# Supplementary material for: Investigation on predominant Leptospira serovars and its distribution in humans and livestock in Thailand, 2010-2015
Source: PLOS journal article supplement (doi:10.1371/journal.pntd.0005228), 2017-02-09
Supplement: S5 (10.1371/journal.pntd.0005228.s005) [file journal.pntd.0005228.s005]

| Label | SPECIES | Region       | Bratislava | Sejroe | Ranarum | Shermani | Tarassovi | MAT |
|-------|---------|--------------|------------|--------|---------|----------|-----------|-----|
| 1     | Human   | Eastern      | 0          | 0      | 0       | 0        | 0         | 0   |
| 2     | Human   | Eastern      | 0          | 0      | 0       | 0        | 0         | 0   |
| 3     | Human   | Central      | 1          | 0      | 0       | 0        | 0         | 1   |
| 4     | Human   | Eastern      | 1          | 0      | 0       | 0        | 0         | 1   |
| 5     | Human   | Southern     | 0          | 0      | 0       | 0        | 0         | 0   |
| 6     | Human   | Southern     | 0          | 0      | 0       | 0        | 0         | 0   |
| 7     | Human   | Southern     | 0          | 1      | 0       | 0        | 0         | 1   |
| 8     | Human   | Southern     | 0          | 0      | 0       | 0        | 0         | 0   |
| 9     | Human   | Southern     | 0          | 0      | 0       | 0        | 0         | 0   |
| 10    | Human   | Central      | 0          | 0      | 0       | 0        | 0         | 0   |
| 11    | Human   | Central      | 0          | 0      | 0       | 1        | 0         | 1   |
| 12    | Human   | Central      | 0          | 0      | 0       | 0        | 0         | 0   |
| 13    | Human   | Central      | 0          | 0      | 0       | 0        | 0         | 0   |
| 14    | Human   | Central      | 0          | 0      | 0       | 0        | 0         | 0   |
| 15    | Human   | Central      | 0          | 0      | 0       | 0        | 0         | 0   |
| 16    | Human   | Northeastern | 0          | 0      | 0       | 0        | 0         | 0   |
| 17    | Human   | Northeastern | 0          | 0      | 0       | 0        | 0         | 0   |
| 18    | Human   | Eastern      | 0          | 0      | 0       | 0        | 0         | 0   |
| 19    | Human   | Central      | 0          | 0      | 0       | 0        | 0         | 0   |
| 20    | Human   | Central      | 0          | 0      | 0       | 0        | 0         | 0   |
| 21    | Human   | Central      | 0          | 0      | 0       | 0        | 0         | 0   |
| 22    | Human   | Central      | 0          | 0      | 0       | 0        | 0         | 0   |
| 23    | Human   | Northeastern | 0          | 0      | 0       | 1        | 0         | 1   |
| 24    | Human   | Northeastern | 0          | 0      | 0       | 1        | 0         | 1   |
| 25    | Human   | Northeastern | 1          | 0      | 0       | 0        | 0         | 1   |
| 26    | Human   | Northeastern | 0          | 0      | 0       | 0        | 0         | 0   |
| 27    | Human   | Northeastern | 0          | 0      | 0       | 1        | 0         | 1   |
| 28    | Human   | Northeastern | 0          | 0      | 0       | 0        | 0         | 0   |
| 29    | Human   | Northeastern | 0          | 0      | 0       | 1        | 0         | 1   |
| 30    | Human   | Northeastern | 0          | 0      | 0       | 1        | 0         | 1   |
| 31    | Human   | Northeastern | 1          | 0      | 0       | 1        | 0         | 1   |
| 32    | Human   | Northeastern | 0          | 0      | 0       | 0        | 0         | 0   |
| 33    | Human   | Northeastern | 0          | 1      | 0       | 0        | 0         | 1   |
| 34    | Human   | Northeastern | 0          | 0      | 0       | 1        | 0         | 1   |
| 35    | Human   | Northeastern | 0          | 0      | 0       | 0        | 1         | 1   |
| 36    | Human   | Northeastern | 0          | 0      | 0       | 0        | 0         | 0   |
| 37    | Human   | Northeastern | 0          | 0      | 0       | 0        | 0         | 1   |
| 38    | Human   | Northeastern | 0          | 0      | 0       | 1        | 0         | 1   |
| 39    | Human   | Northeastern | 1          | 0      | 0       | 0        | 0         | 1   |
| 40    | Human   | Northeastern | 1          | 0      | 0       | 0        | 0         | 1   |
| 41    | Human   | Northeastern | 1          | 0      | 0       | 1        | 0         | 1   |
| 42    | Human   | Northeastern | 0          | 0      | 0       | 1        | 0         | 1   |
| 43    | Human   | Central      | 0          | 0      | 0       | 1        | 0         | 1   |
| 44    | Human   | Central      | 0          | 0      | 0       | 0        | 0         | 0   |
| 45    | Human   | Central      | 0          | 0      | 0       | 0        | 0         | 0   |
| 46    | Human   | Central      | 0          | 0      | 0       | 0        | 0         | 0   |
| 47    | Human   | Central      | 0          | 0      | 0       | 0        | 0         | 0   |

|    |       |              |   |   |   |   |   |   |
|----|-------|--------------|---|---|---|---|---|---|
| 48 | Human | Northern     | 0 | 0 | 0 | 0 | 0 | 0 |
| 49 | Human | Northern     | 0 | 0 | 0 | 0 | 0 | 0 |
| 50 | Human | Northern     | 0 | 0 | 0 | 1 | 0 | 1 |
| 51 | Human | Northern     | 0 | 0 | 0 | 0 | 0 | 0 |
| 52 | Human | Northern     | 0 | 0 | 0 | 0 | 0 | 0 |
| 53 | Human | Northern     | 0 | 0 | 0 | 0 | 0 | 0 |
| 54 | Human | Northern     | 0 | 0 | 0 | 0 | 0 | 0 |
| 55 | Human | Northern     | 0 | 0 | 0 | 0 | 0 | 0 |
| 56 | Human | Northern     | 0 | 0 | 0 | 0 | 0 | 0 |
| 57 | Human | Northern     | 0 | 0 | 0 | 0 | 0 | 0 |
| 58 | Human | Northern     | 0 | 0 | 0 | 0 | 0 | 0 |
| 59 | Human | Northern     | 0 | 0 | 0 | 0 | 0 | 0 |
| 60 | Human | Northern     | 0 | 0 | 0 | 0 | 0 | 0 |
| 61 | Human | Northern     | 0 | 0 | 0 | 0 | 0 | 0 |
| 62 | Human | Northern     | 0 | 0 | 0 | 0 | 0 | 0 |
| 63 | Human | Northern     | 0 | 0 | 0 | 0 | 0 | 0 |
| 64 | Human | Northern     | 0 | 0 | 0 | 0 | 0 | 0 |
| 65 | Human | Northern     | 0 | 0 | 0 | 0 | 0 | 0 |
| 66 | Human | Northern     | 0 | 0 | 0 | 0 | 0 | 0 |
| 67 | Human | Northern     | 0 | 0 | 0 | 1 | 0 | 1 |
| 68 | Human | Northern     | 0 | 0 | 0 | 1 | 0 | 1 |
| 69 | Human | Northern     | 0 | 0 | 0 | 0 | 0 | 0 |
| 70 | Human | Northern     | 0 | 0 | 0 | 1 | 0 | 1 |
| 71 | Human | Northern     | 0 | 0 | 0 | 0 | 0 | 0 |
| 72 | Human | Northern     | 0 | 0 | 0 | 0 | 0 | 0 |
| 73 | Human | Northern     | 0 | 0 | 0 | 0 | 0 | 0 |
| 74 | Human | Northern     | 0 | 0 | 0 | 0 | 0 | 0 |
| 75 | Human | Northern     | 0 | 0 | 0 | 1 | 0 | 1 |
| 76 | Human | Northern     | 0 | 1 | 0 | 0 | 0 | 1 |
| 77 | Human | Northern     | 0 | 0 | 0 | 0 | 0 | 0 |
| 78 | Human | Northern     | 0 | 0 | 0 | 0 | 0 | 0 |
| 79 | Human | Northern     | 0 | 0 | 0 | 0 | 0 | 0 |
| 80 | Human | Northern     | 0 | 0 | 0 | 0 | 0 | 0 |
| 81 | Human | Northern     | 0 | 0 | 0 | 0 | 0 | 0 |
| 82 | Human | Northern     | 0 | 0 | 0 | 0 | 0 | 0 |
| 83 | Human | Northern     | 0 | 0 | 0 | 0 | 0 | 0 |
| 84 | Human | Northern     | 0 | 0 | 0 | 0 | 0 | 0 |
| 85 | Human | Northern     | 0 | 1 | 0 | 1 | 0 | 1 |
| 86 | Human | Northern     | 0 | 0 | 0 | 0 | 0 | 0 |
| 87 | Human | Northern     | 0 | 0 | 0 | 0 | 0 | 0 |
| 88 | Human | Northern     | 0 | 0 | 0 | 0 | 0 | 0 |
| 89 | Human | Northern     | 0 | 0 | 0 | 0 | 0 | 0 |
| 90 | Human | Northern     | 0 | 0 | 0 | 0 | 0 | 0 |
| 91 | Human | Central      | 0 | 0 | 0 | 0 | 0 | 0 |
| 92 | Human | Northeastern | 0 | 0 | 0 | 0 | 0 | 0 |
| 93 | Human | Northeastern | 0 | 0 | 0 | 0 | 0 | 0 |
| 94 | Human | Northeastern | 0 | 0 | 0 | 0 | 0 | 0 |
| 95 | Human | Northeastern | 0 | 0 | 0 | 0 | 0 | 0 |

|     |       |              |   |   |   |   |   |   |
|-----|-------|--------------|---|---|---|---|---|---|
| 96  | Human | Northeastern | 1 | 0 | 0 | 1 | 0 | 1 |
| 97  | Human | Northeastern | 0 | 0 | 0 | 0 | 0 | 0 |
| 98  | Human | Northeastern | 0 | 0 | 0 | 0 | 0 | 0 |
| 99  | Human | Northeastern | 0 | 0 | 0 | 0 | 0 | 0 |
| 100 | Human | Northeastern | 0 | 0 | 0 | 0 | 0 | 0 |
| 101 | Human | Northeastern | 0 | 0 | 0 | 0 | 0 | 0 |
| 102 | Human | Northeastern | 0 | 0 | 0 | 0 | 0 | 0 |
| 103 | Human | Northeastern | 0 | 0 | 0 | 0 | 0 | 0 |
| 104 | Human | Northeastern | 0 | 0 | 0 | 0 | 0 | 0 |
| 105 | Human | Northeastern | 0 | 0 | 0 | 0 | 0 | 0 |
| 106 | Human | Northeastern | 0 | 0 | 0 | 0 | 0 | 0 |
| 107 | Human | Northeastern | 1 | 0 | 0 | 0 | 0 | 1 |
| 108 | Human | Northeastern | 1 | 0 | 0 | 0 | 0 | 1 |
| 109 | Human | Northeastern | 0 | 0 | 0 | 0 | 0 | 0 |
| 110 | Human | Northeastern | 0 | 0 | 0 | 0 | 0 | 0 |
| 111 | Human | Northeastern | 0 | 0 | 0 | 0 | 0 | 0 |
| 112 | Human | Northeastern | 0 | 0 | 0 | 0 | 0 | 0 |
| 113 | Human | Northeastern | 0 | 0 | 0 | 0 | 0 | 0 |
| 114 | Human | Northeastern | 0 | 0 | 0 | 0 | 0 | 0 |
| 115 | Human | Northeastern | 0 | 0 | 0 | 0 | 0 | 0 |
| 116 | Human | Northeastern | 0 | 0 | 0 | 0 | 0 | 1 |
| 117 | Human | Northeastern | 0 | 0 | 0 | 0 | 0 | 0 |
| 118 | Human | Northeastern | 0 | 0 | 0 | 0 | 0 | 0 |
| 119 | Human | Northeastern | 0 | 0 | 0 | 0 | 0 | 0 |
| 120 | Human | Northeastern | 0 | 0 | 0 | 0 | 0 | 0 |
| 121 | Human | Northeastern | 0 | 0 | 0 | 0 | 0 | 0 |
| 122 | Human | Northeastern | 0 | 0 | 0 | 0 | 0 | 0 |
| 123 | Human | Northeastern | 0 | 0 | 0 | 0 | 0 | 0 |
| 124 | Human | Northeastern | 0 | 0 | 0 | 0 | 0 | 0 |
| 125 | Human | Northeastern | 0 | 0 | 0 | 0 | 0 | 0 |
| 126 | Human | Northeastern | 0 | 0 | 0 | 0 | 0 | 0 |
| 127 | Human | Northeastern | 0 | 0 | 0 | 0 | 0 | 0 |
| 128 | Human | Northeastern | 0 | 0 | 0 | 0 | 0 | 0 |
| 129 | Human | Northeastern | 0 | 0 | 0 | 0 | 0 | 0 |
| 130 | Human | Northeastern | 0 | 0 | 0 | 0 | 0 | 0 |
| 131 | Human | Northeastern | 0 | 0 | 0 | 0 | 0 | 0 |
| 132 | Human | Northeastern | 1 | 0 | 0 | 1 | 0 | 1 |
| 133 | Human | Northeastern | 0 | 0 | 0 | 0 | 0 | 0 |
| 134 | Human | Northeastern | 0 | 0 | 0 | 0 | 0 | 0 |
| 135 | Human | Northeastern | 0 | 0 | 0 | 0 | 0 | 0 |
| 136 | Human | Northeastern | 0 | 0 | 0 | 1 | 0 | 1 |
| 137 | Human | Northeastern | 0 | 0 | 0 | 1 | 0 | 1 |
| 138 | Human | Northeastern | 0 | 0 | 0 | 0 | 0 | 0 |
| 139 | Human | Northeastern | 0 | 0 | 0 | 0 | 0 | 0 |
| 140 | Human | Northeastern | 0 | 0 | 0 | 0 | 0 | 0 |
| 141 | Human | Northeastern | 1 | 0 | 0 | 1 | 0 | 1 |
| 142 | Human | Northeastern | 0 | 0 | 0 | 0 | 0 | 0 |
| 143 | Human | Northeastern | 0 | 0 | 0 | 0 | 0 | 0 |

|     |       |              |   |   |   |   |   |   |
|-----|-------|--------------|---|---|---|---|---|---|
| 144 | Human | Northeastern | 0 | 0 | 0 | 0 | 0 | 0 |
| 145 | Human | Northeastern | 0 | 0 | 0 | 0 | 0 | 0 |
| 146 | Human | Northeastern | 0 | 0 | 0 | 0 | 0 | 0 |
| 147 | Human | Northeastern | 0 | 0 | 0 | 1 | 0 | 1 |
| 148 | Human | Southern     | 0 | 0 | 0 | 0 | 0 | 0 |
| 149 | Human | Central      | 0 | 0 | 0 | 0 | 0 | 0 |
| 150 | Human | Central      | 0 | 0 | 0 | 0 | 0 | 0 |
| 151 | Human | Central      | 0 | 0 | 0 | 0 | 0 | 1 |
| 152 | Human | Central      | 0 | 0 | 0 | 0 | 0 | 0 |
| 153 | Human | Eastern      | 0 | 0 | 0 | 0 | 0 | 0 |
| 154 | Human | Central      | 0 | 0 | 0 | 0 | 0 | 0 |
| 155 | Human | Central      | 0 | 0 | 0 | 0 | 0 | 0 |
| 156 | Human | Central      | 0 | 0 | 0 | 0 | 0 | 0 |
| 157 | Human | Central      | 0 | 0 | 0 | 0 | 0 | 0 |
| 158 | Human | Eastern      | 0 | 0 | 0 | 1 | 0 | 1 |
| 159 | Human | Southern     | 0 | 0 | 0 | 0 | 0 | 0 |
| 160 | Human | Central      | 0 | 0 | 0 | 0 | 0 | 0 |
| 161 | Human | Central      | 0 | 0 | 0 | 0 | 0 | 0 |
| 162 | Human | Northeastern | 0 | 0 | 0 | 0 | 0 | 0 |
| 163 | Human | Northeastern | 0 | 0 | 0 | 0 | 0 | 0 |
| 164 | Human | Northeastern | 0 | 0 | 0 | 0 | 0 | 0 |
| 165 | Human | Northeastern | 0 | 0 | 0 | 1 | 0 | 1 |
| 166 | Human | Northeastern | 0 | 0 | 0 | 1 | 0 | 1 |
| 167 | Human | Northeastern | 0 | 0 | 0 | 0 | 0 | 0 |
| 168 | Human | Northeastern | 0 | 0 | 0 | 0 | 0 | 0 |
| 169 | Human | Northeastern | 0 | 0 | 0 | 0 | 0 | 0 |
| 170 | Human | Northeastern | 0 | 0 | 0 | 1 | 0 | 1 |
| 171 | Human | Northeastern | 0 | 0 | 0 | 0 | 0 | 0 |
| 172 | Human | Northeastern | 0 | 0 | 0 | 1 | 0 | 1 |
| 173 | Human | Northeastern | 0 | 0 | 0 | 0 | 0 | 0 |
| 174 | Human | Northeastern | 0 | 0 | 0 | 0 | 0 | 0 |
| 175 | Human | Northeastern | 0 | 0 | 0 | 0 | 0 | 0 |
| 176 | Human | Northeastern | 0 | 0 | 0 | 0 | 0 | 0 |
| 177 | Human | Northeastern | 0 | 0 | 0 | 0 | 0 | 0 |
| 178 | Human | Northeastern | 0 | 0 | 0 | 0 | 0 | 0 |
| 179 | Human | Northeastern | 0 | 0 | 0 | 0 | 0 | 0 |
| 180 | Human | Northeastern | 0 | 0 | 0 | 0 | 0 | 0 |
| 181 | Human | Northeastern | 0 | 0 | 0 | 1 | 0 | 1 |
| 182 | Human | Northeastern | 0 | 0 | 0 | 1 | 0 | 1 |
| 183 | Human | Northeastern | 0 | 0 | 0 | 0 | 0 | 0 |
| 184 | Human | Northeastern | 0 | 0 | 0 | 0 | 0 | 0 |
| 185 | Human | Northeastern | 0 | 0 | 0 | 0 | 0 | 0 |
| 186 | Human | Northeastern | 0 | 0 | 0 | 0 | 0 | 0 |
| 187 | Human | Northeastern | 0 | 1 | 0 | 1 | 0 | 1 |
| 188 | Human | Northeastern | 0 | 0 | 0 | 1 | 0 | 1 |
| 189 | Human | Northeastern | 0 | 0 | 0 | 0 | 0 | 0 |
| 190 | Human | Northeastern | 0 | 0 | 0 | 0 | 0 | 0 |
| 191 | Human | Northeastern | 0 | 0 | 0 | 1 | 0 | 1 |

|     |       |              |   |   |   |   |   |   |
|-----|-------|--------------|---|---|---|---|---|---|
| 192 | Human | Northeastern | 0 | 0 | 0 | 1 | 0 | 1 |
| 193 | Human | Northeastern | 0 | 0 | 0 | 1 | 0 | 1 |
| 194 | Human | Northeastern | 0 | 0 | 0 | 1 | 0 | 1 |
| 195 | Human | Northeastern | 0 | 0 | 0 | 0 | 0 | 0 |
| 196 | Human | Northeastern | 0 | 0 | 0 | 0 | 0 | 0 |
| 197 | Human | Northeastern | 0 | 0 | 0 | 0 | 0 | 0 |
| 198 | Human | Northeastern | 0 | 0 | 0 | 0 | 0 | 0 |
| 199 | Human | Northeastern | 0 | 0 | 0 | 0 | 0 | 0 |
| 200 | Human | Northeastern | 0 | 0 | 0 | 0 | 0 | 0 |
| 201 | Human | Northeastern | 0 | 0 | 0 | 0 | 0 | 0 |
| 202 | Human | Northeastern | 0 | 0 | 0 | 0 | 0 | 0 |
| 203 | Human | Northeastern | 0 | 0 | 0 | 0 | 0 | 0 |
| 204 | Human | Northeastern | 0 | 0 | 0 | 0 | 0 | 0 |
| 205 | Human | Northeastern | 1 | 0 | 0 | 0 | 0 | 1 |
| 206 | Human | Northeastern | 1 | 0 | 0 | 0 | 0 | 1 |
| 207 | Human | Northeastern | 1 | 0 | 0 | 1 | 0 | 1 |
| 208 | Human | Northeastern | 0 | 0 | 0 | 1 | 0 | 1 |
| 209 | Human | Northeastern | 0 | 0 | 0 | 0 | 0 | 0 |
| 210 | Human | Northeastern | 0 | 0 | 0 | 0 | 0 | 0 |
| 211 | Human | Northeastern | 0 | 0 | 0 | 0 | 0 | 0 |
| 212 | Human | Northeastern | 0 | 0 | 0 | 1 | 0 | 1 |
| 213 | Human | Northeastern | 0 | 0 | 0 | 1 | 0 | 1 |
| 214 | Human | Northeastern | 0 | 0 | 0 | 0 | 0 | 0 |
| 215 | Human | Northeastern | 0 | 0 | 0 | 0 | 0 | 0 |
| 216 | Human | Northeastern | 0 | 0 | 0 | 0 | 0 | 0 |
| 217 | Human | Northeastern | 0 | 0 | 0 | 0 | 0 | 0 |
| 218 | Human | Northeastern | 0 | 0 | 0 | 0 | 0 | 0 |
| 219 | Human | Northeastern | 0 | 0 | 0 | 0 | 0 | 0 |
| 220 | Human | Northeastern | 0 | 0 | 0 | 0 | 0 | 0 |
| 221 | Human | Northeastern | 0 | 0 | 0 | 0 | 0 | 0 |
| 222 | Human | Northeastern | 1 | 0 | 0 | 1 | 0 | 1 |
| 223 | Human | Northeastern | 0 | 0 | 0 | 1 | 0 | 1 |
| 224 | Human | Central      | 0 | 0 | 0 | 0 | 0 | 0 |
| 225 | Human | Central      | 0 | 0 | 0 | 0 | 0 | 0 |
| 226 | Human | Central      | 0 | 0 | 0 | 0 | 0 | 0 |
| 227 | Human | Central      | 0 | 0 | 0 | 0 | 0 | 0 |
| 228 | Human | Southern     | 0 | 0 | 0 | 1 | 0 | 1 |
| 229 | Human | Southern     | 0 | 0 | 0 | 1 | 0 | 1 |
| 230 | Human | Southern     | 0 | 0 | 0 | 1 | 0 | 1 |
| 231 | Human | Southern     | 0 | 0 | 0 | 0 | 0 | 1 |
| 232 | Human | Southern     | 0 | 0 | 0 | 1 | 0 | 1 |
| 233 | Human | Central      | 0 | 0 | 0 | 0 | 0 | 0 |
| 234 | Human | Central      | 0 | 0 | 0 | 1 | 0 | 1 |
| 235 | Human | Central      | 0 | 0 | 0 | 0 | 0 | 0 |
| 236 | Human | Central      | 0 | 0 | 0 | 0 | 0 | 0 |
| 237 | Human | Central      | 0 | 0 | 0 | 0 | 0 | 0 |
| 238 | Human | Central      | 0 | 0 | 0 | 0 | 0 | 0 |
| 239 | Human | Central      | 0 | 0 | 0 | 0 | 0 | 0 |

|     |       |          |   |   |   |   |   |   |
|-----|-------|----------|---|---|---|---|---|---|
| 240 | Human | Central  | 0 | 0 | 0 | 0 | 0 | 0 |
| 241 | Human | Central  | 0 | 0 | 0 | 0 | 0 | 0 |
| 242 | Human | Central  | 0 | 0 | 0 | 0 | 0 | 0 |
| 243 | Human | Central  | 0 | 0 | 0 | 0 | 0 | 0 |
| 244 | Human | Central  | 0 | 0 | 0 | 0 | 0 | 0 |
| 245 | Human | Central  | 0 | 0 | 0 | 0 | 0 | 0 |
| 246 | Human | Central  | 0 | 0 | 0 | 1 | 0 | 1 |
| 247 | Human | Central  | 0 | 0 | 0 | 1 | 0 | 1 |
| 248 | Human | Central  | 1 | 0 | 0 | 0 | 0 | 1 |
| 249 | Human | Central  | 0 | 0 | 0 | 1 | 0 | 1 |
| 250 | Human | Central  | 0 | 0 | 0 | 1 | 0 | 1 |
| 251 | Human | Central  | 0 | 0 | 0 | 1 | 0 | 1 |
| 252 | Human | Southern | 0 | 0 | 0 | 1 | 0 | 1 |
| 253 | Human | Southern | 0 | 0 | 0 | 1 | 0 | 1 |
| 254 | Human | Southern | 0 | 0 | 0 | 1 | 0 | 1 |
| 255 | Human | Southern | 0 | 0 | 0 | 1 | 0 | 1 |
| 256 | Human | Southern | 0 | 0 | 0 | 1 | 0 | 1 |
| 257 | Human | Southern | 0 | 0 | 0 | 1 | 0 | 1 |
| 258 | Human | Southern | 0 | 0 | 0 | 1 | 0 | 1 |
| 259 | Human | Southern | 0 | 0 | 0 | 1 | 0 | 1 |
| 260 | Human | Southern | 0 | 0 | 0 | 1 | 0 | 1 |
| 261 | Human | Southern | 0 | 0 | 0 | 1 | 0 | 1 |
| 262 | Human | Southern | 0 | 0 | 0 | 1 | 0 | 1 |
| 263 | Human | Southern | 0 | 0 | 0 | 1 | 0 | 1 |
| 264 | Human | Southern | 0 | 0 | 0 | 1 | 0 | 1 |
| 265 | Human | Southern | 0 | 0 | 0 | 1 | 0 | 1 |
| 266 | Human | Southern | 0 | 0 | 0 | 1 | 0 | 1 |
| 267 | Human | Southern | 0 | 0 | 0 | 1 | 0 | 1 |
| 268 | Human | Southern | 0 | 0 | 0 | 1 | 0 | 1 |
| 269 | Human | Southern | 0 | 0 | 0 | 1 | 0 | 1 |
| 270 | Human | Southern | 0 | 0 | 0 | 1 | 0 | 1 |
| 271 | Human | Southern | 0 | 0 | 0 | 1 | 0 | 1 |
| 272 | Human | Southern | 0 | 0 | 0 | 1 | 0 | 1 |
| 273 | Human | Southern | 0 | 0 | 0 | 1 | 0 | 1 |
| 274 | Human | Southern | 0 | 0 | 0 | 1 | 0 | 1 |
| 275 | Human | Southern | 0 | 0 | 0 | 1 | 0 | 1 |
| 276 | Human | Southern | 0 | 0 | 0 | 1 | 0 | 1 |
| 277 | Human | Southern | 0 | 0 | 0 | 1 | 0 | 1 |
| 278 | Human | Southern | 0 | 0 | 0 | 1 | 0 | 1 |
| 279 | Human | Southern | 0 | 0 | 0 | 1 | 0 | 1 |
| 280 | Human | Southern | 0 | 0 | 0 | 1 | 0 | 1 |
| 281 | Human | Southern | 0 | 0 | 0 | 1 | 0 | 1 |
| 282 | Human | Southern | 0 | 0 | 0 | 1 | 0 | 1 |
| 283 | Human | Southern | 0 | 0 | 0 | 1 | 0 | 1 |
| 284 | Human | Southern | 0 | 0 | 0 | 1 | 0 | 1 |
| 285 | Human | Southern | 0 | 0 | 0 | 1 | 0 | 1 |
| 286 | Human | Southern | 0 | 0 | 0 | 1 | 0 | 1 |
| 287 | Human | Southern | 0 | 0 | 0 | 1 | 0 | 1 |

|     |       |              |   |   |   |   |   |   |
|-----|-------|--------------|---|---|---|---|---|---|
| 288 | Human | Southern     | 0 | 0 | 0 | 1 | 0 | 1 |
| 289 | Human | Southern     | 0 | 0 | 0 | 1 | 0 | 1 |
| 290 | Human | Southern     | 0 | 0 | 0 | 1 | 0 | 1 |
| 291 | Human | Southern     | 0 | 0 | 0 | 1 | 0 | 1 |
| 292 | Human | Southern     | 0 | 0 | 0 | 1 | 0 | 1 |
| 293 | Human | Southern     | 0 | 0 | 0 | 1 | 0 | 1 |
| 294 | Human | Southern     | 0 | 0 | 0 | 1 | 0 | 1 |
| 295 | Human | Southern     | 0 | 0 | 0 | 1 | 0 | 1 |
| 296 | Human | Southern     | 0 | 0 | 0 | 1 | 0 | 1 |
| 297 | Human | Northeastern | 0 | 0 | 0 | 1 | 0 | 1 |
| 298 | Human | Northeastern | 0 | 0 | 0 | 1 | 0 | 1 |
| 299 | Human | Northeastern | 0 | 0 | 0 | 0 | 0 | 0 |
| 300 | Human | Northeastern | 0 | 0 | 0 | 1 | 0 | 1 |
| 301 | Human | Northeastern | 0 | 0 | 0 | 0 | 0 | 0 |
| 302 | Human | Northeastern | 0 | 0 | 0 | 0 | 0 | 1 |
| 303 | Human | Northeastern | 0 | 0 | 0 | 0 | 0 | 0 |
| 304 | Human | Northeastern | 0 | 1 | 0 | 0 | 0 | 1 |
| 305 | Human | Northeastern | 0 | 0 | 0 | 1 | 0 | 1 |
| 306 | Human | Northeastern | 0 | 0 | 0 | 0 | 0 | 0 |
| 307 | Human | Northeastern | 0 | 0 | 0 | 1 | 0 | 1 |
| 308 | Human | Northeastern | 0 | 0 | 0 | 1 | 0 | 1 |
| 309 | Human | Northeastern | 0 | 0 | 0 | 1 | 0 | 1 |
| 310 | Human | Northeastern | 0 | 0 | 0 | 1 | 0 | 1 |
| 311 | Human | Northeastern | 0 | 0 | 0 | 1 | 0 | 1 |
| 312 | Human | Northeastern | 0 | 0 | 0 | 1 | 0 | 1 |
| 313 | Human | Northeastern | 0 | 0 | 0 | 1 | 0 | 1 |
| 314 | Human | Northeastern | 0 | 0 | 0 | 1 | 0 | 1 |
| 315 | Human | Northeastern | 1 | 0 | 0 | 0 | 0 | 1 |
| 316 | Human | Northeastern | 0 | 0 | 0 | 1 | 0 | 1 |
| 317 | Human | Northeastern | 1 | 0 | 0 | 0 | 0 | 1 |
| 318 | Human | Northeastern | 0 | 0 | 0 | 0 | 0 | 0 |
| 319 | Human | Northeastern | 0 | 0 | 0 | 1 | 0 | 1 |
| 320 | Human | Northeastern | 0 | 0 | 0 | 1 | 0 | 1 |
| 321 | Human | Northeastern | 0 | 0 | 0 | 0 | 0 | 0 |
| 322 | Human | Northeastern | 0 | 0 | 0 | 1 | 0 | 1 |
| 323 | Human | Northeastern | 0 | 0 | 0 | 1 | 0 | 1 |
| 324 | Human | Northeastern | 0 | 0 | 0 | 1 | 0 | 1 |
| 325 | Human | Northeastern | 0 | 0 | 0 | 0 | 0 | 0 |
| 326 | Human | Northeastern | 1 | 0 | 0 | 1 | 0 | 1 |
| 327 | Human | Northeastern | 0 | 0 | 0 | 1 | 0 | 1 |
| 328 | Human | Northeastern | 0 | 0 | 0 | 1 | 0 | 1 |
| 329 | Human | Northeastern | 0 | 0 | 0 | 0 | 0 | 0 |
| 330 | Human | Northeastern | 0 | 0 | 0 | 1 | 0 | 1 |
| 331 | Human | Northeastern | 0 | 0 | 0 | 1 | 0 | 1 |
| 332 | Human | Northeastern | 0 | 0 | 0 | 1 | 0 | 1 |
| 333 | Human | Northeastern | 0 | 0 | 0 | 1 | 0 | 1 |
| 334 | Human | Northeastern | 1 | 0 | 0 | 0 | 0 | 1 |
| 335 | Human | Northeastern | 0 | 0 | 0 | 0 | 0 | 0 |

|     |       |              |   |   |   |   |   |   |
|-----|-------|--------------|---|---|---|---|---|---|
| 336 | Human | Northeastern | 0 | 0 | 0 | 1 | 0 | 1 |
| 337 | Human | Northeastern | 0 | 0 | 0 | 0 | 0 | 0 |
| 338 | Human | Northeastern | 0 | 0 | 0 | 0 | 0 | 0 |
| 339 | Human | Northeastern | 0 | 0 | 0 | 1 | 0 | 1 |
| 340 | Human | Northeastern | 0 | 0 | 0 | 1 | 0 | 1 |
| 341 | Human | Northeastern | 0 | 0 | 0 | 0 | 0 | 0 |
| 342 | Human | Northeastern | 1 | 0 | 0 | 0 | 0 | 1 |
| 343 | Human | Northeastern | 0 | 0 | 0 | 0 | 0 | 0 |
| 344 | Human | Northeastern | 0 | 0 | 0 | 1 | 0 | 1 |
| 345 | Human | Northeastern | 0 | 0 | 0 | 0 | 0 | 0 |
| 346 | Human | Northeastern | 0 | 0 | 0 | 0 | 0 | 1 |
| 347 | Human | Northeastern | 0 | 0 | 0 | 0 | 0 | 0 |
| 348 | Human | Northeastern | 0 | 1 | 0 | 0 | 0 | 1 |
| 349 | Human | Northeastern | 0 | 0 | 0 | 0 | 0 | 0 |
| 350 | Human | Northeastern | 0 | 0 | 0 | 1 | 0 | 1 |
| 351 | Human | Central      | 0 | 0 | 0 | 0 | 0 | 0 |
| 352 | Human | Central      | 0 | 0 | 0 | 0 | 0 | 0 |
| 353 | Human | Central      | 0 | 0 | 0 | 0 | 0 | 0 |
| 354 | Human | Central      | 0 | 0 | 0 | 0 | 0 | 0 |
| 355 | Human | Central      | 1 | 0 | 0 | 0 | 0 | 1 |
| 356 | Human | Central      | 0 | 0 | 0 | 0 | 0 | 0 |
| 357 | Human | Central      | 1 | 0 | 0 | 0 | 0 | 1 |
| 358 | Human | Central      | 0 | 0 | 0 | 0 | 0 | 0 |
| 359 | Human | Central      | 0 | 0 | 0 | 0 | 0 | 0 |
| 360 | Human | Northern     | 0 | 0 | 0 | 1 | 0 | 1 |
| 361 | Human | Northern     | 0 | 0 | 0 | 1 | 0 | 1 |
| 362 | Human | Northern     | 0 | 0 | 0 | 0 | 0 | 0 |
| 363 | Human | Northern     | 0 | 0 | 0 | 0 | 0 | 0 |
| 364 | Human | Northern     | 0 | 0 | 0 | 0 | 0 | 0 |
| 365 | Human | Northern     | 0 | 0 | 0 | 0 | 0 | 0 |
| 366 | Human | Northern     | 0 | 0 | 0 | 0 | 0 | 0 |
| 367 | Human | Northern     | 0 | 0 | 0 | 0 | 0 | 0 |
| 368 | Human | Northern     | 0 | 0 | 0 | 0 | 0 | 0 |
| 369 | Human | Northern     | 0 | 0 | 0 | 0 | 0 | 0 |
| 370 | Human | Northern     | 0 | 0 | 0 | 0 | 0 | 0 |
| 371 | Human | Northern     | 0 | 0 | 0 | 1 | 0 | 1 |
| 372 | Human | Northern     | 0 | 0 | 0 | 0 | 0 | 0 |
| 373 | Human | Northern     | 0 | 0 | 0 | 0 | 0 | 0 |
| 374 | Human | Northern     | 0 | 0 | 0 | 0 | 0 | 0 |
| 375 | Human | Northern     | 0 | 0 | 0 | 0 | 0 | 0 |
| 376 | Human | Northern     | 0 | 0 | 0 | 0 | 0 | 0 |
| 377 | Human | Northern     | 0 | 0 | 0 | 0 | 0 | 0 |
| 378 | Human | Northern     | 0 | 0 | 0 | 0 | 0 | 0 |
| 379 | Human | Northern     | 0 | 0 | 0 | 0 | 0 | 0 |
| 380 | Human | Northern     | 0 | 0 | 0 | 0 | 0 | 0 |
| 381 | Human | Northern     | 0 | 0 | 0 | 0 | 0 | 0 |
| 382 | Human | Northern     | 0 | 0 | 0 | 0 | 0 | 0 |
| 383 | Human | Northern     | 0 | 0 | 0 | 0 | 0 | 0 |



|     |       |          |   |   |   |   |   |   |
|-----|-------|----------|---|---|---|---|---|---|
| 384 | Human | Northern | 0 | 0 | 0 | 0 | 0 | 0 |
| 385 | Human | Northern | 0 | 0 | 0 | 0 | 0 | 0 |
| 386 | Human | Northern | 0 | 0 | 0 | 0 | 0 | 0 |
| 387 | Human | Northern | 0 | 0 | 0 | 0 | 0 | 0 |
| 388 | Human | Northern | 0 | 0 | 0 | 0 | 0 | 0 |
| 389 | Human | Northern | 0 | 0 | 0 | 0 | 0 | 0 |
| 390 | Human | Northern | 0 | 0 | 0 | 0 | 0 | 0 |
| 391 | Human | Northern | 0 | 0 | 0 | 0 | 0 | 0 |
| 392 | Human | Northern | 0 | 0 | 0 | 0 | 0 | 0 |
| 393 | Human | Northern | 0 | 0 | 0 | 0 | 0 | 0 |
| 394 | Human | Northern | 0 | 0 | 0 | 0 | 0 | 0 |
| 395 | Human | Northern | 0 | 0 | 0 | 0 | 0 | 0 |
| 396 | Human | Northern | 0 | 0 | 0 | 0 | 0 | 0 |
| 397 | Human | Northern | 1 | 1 | 0 | 1 | 0 | 1 |
| 398 | Human | Northern | 0 | 0 | 0 | 0 | 0 | 0 |
| 399 | Human | Northern | 0 | 0 | 0 | 0 | 0 | 0 |
| 400 | Human | Northern | 0 | 0 | 0 | 0 | 0 | 0 |
| 401 | Human | Northern | 0 | 0 | 0 | 0 | 0 | 0 |
| 402 | Human | Northern | 0 | 0 | 0 | 0 | 0 | 0 |
| 403 | Human | Northern | 0 | 0 | 0 | 0 | 0 | 0 |
| 404 | Human | Northern | 0 | 0 | 0 | 0 | 0 | 0 |
| 405 | Human | Northern | 0 | 0 | 0 | 0 | 0 | 0 |
| 406 | Human | Northern | 0 | 0 | 0 | 0 | 0 | 0 |
| 407 | Human | Northern | 0 | 0 | 0 | 0 | 0 | 0 |
| 408 | Human | Northern | 0 | 0 | 0 | 0 | 0 | 0 |
| 409 | Human | Northern | 0 | 0 | 0 | 1 | 0 | 1 |
| 410 | Human | Northern | 0 | 0 | 0 | 0 | 0 | 0 |
| 411 | Human | Northern | 0 | 0 | 0 | 0 | 0 | 0 |
| 412 | Human | Northern | 0 | 0 | 0 | 0 | 0 | 0 |
| 413 | Human | Northern | 0 | 0 | 0 | 0 | 0 | 0 |
| 414 | Human | Northern | 0 | 0 | 0 | 0 | 0 | 0 |
| 415 | Human | Northern | 0 | 0 | 0 | 0 | 0 | 0 |
| 416 | Human | Northern | 0 | 0 | 0 | 0 | 0 | 0 |
| 417 | Human | Northern | 0 | 0 | 0 | 0 | 0 | 0 |
| 418 | Human | Northern | 0 | 0 | 0 | 0 | 0 | 0 |
| 419 | Human | Northern | 0 | 0 | 0 | 0 | 0 | 0 |
| 420 | Human | Northern | 0 | 0 | 0 | 0 | 0 | 0 |
| 421 | Human | Northern | 0 | 0 | 0 | 0 | 0 | 0 |
| 422 | Human | Northern | 0 | 0 | 0 | 0 | 0 | 0 |
| 423 | Human | Northern | 0 | 0 | 0 | 0 | 0 | 0 |
| 424 | Human | Northern | 0 | 0 | 0 | 1 | 0 | 1 |
| 425 | Human | Northern | 0 | 0 | 0 | 1 | 0 | 1 |
| 426 | Human | Northern | 0 | 0 | 0 | 0 | 0 | 0 |
| 427 | Human | Northern | 0 | 0 | 0 | 0 | 0 | 0 |
| 428 | Human | Northern | 0 | 0 | 0 | 0 | 0 | 0 |
| 429 | Human | Northern | 0 | 0 | 0 | 0 | 0 | 0 |
| 430 | Human | Northern | 0 | 0 | 0 | 0 | 0 | 0 |
| 431 | Human | Northern | 0 | 0 | 0 | 0 | 0 | 0 |

|     |       |          |   |   |   |   |   |   |
|-----|-------|----------|---|---|---|---|---|---|
| 432 | Human | Northern | 0 | 0 | 0 | 0 | 0 | 0 |
| 433 | Human | Northern | 0 | 0 | 0 | 0 | 0 | 0 |
| 434 | Human | Northern | 0 | 0 | 0 | 0 | 0 | 0 |
| 435 | Human | Northern | 0 | 0 | 0 | 0 | 0 | 0 |
| 436 | Human | Northern | 0 | 0 | 0 | 0 | 0 | 0 |
| 437 | Human | Northern | 1 | 0 | 0 | 0 | 0 | 1 |
| 438 | Human | Northern | 0 | 0 | 0 | 0 | 0 | 0 |
| 439 | Human | Northern | 0 | 0 | 0 | 0 | 0 | 0 |
| 440 | Human | Northern | 0 | 0 | 0 | 0 | 0 | 0 |
| 441 | Human | Northern | 0 | 0 | 0 | 0 | 0 | 0 |
| 442 | Human | Northern | 0 | 0 | 0 | 0 | 0 | 0 |
| 443 | Human | Northern | 0 | 0 | 0 | 1 | 0 | 1 |
| 444 | Human | Northern | 0 | 0 | 0 | 0 | 0 | 0 |
| 445 | Human | Northern | 0 | 0 | 0 | 1 | 0 | 1 |
| 446 | Human | Northern | 0 | 0 | 0 | 0 | 0 | 0 |
| 447 | Human | Northern | 0 | 0 | 0 | 0 | 0 | 0 |
| 448 | Human | Northern | 0 | 0 | 0 | 0 | 0 | 0 |
| 449 | Human | Northern | 0 | 0 | 0 | 0 | 0 | 0 |
| 450 | Human | Northern | 0 | 0 | 0 | 0 | 0 | 0 |
| 451 | Human | Northern | 0 | 0 | 0 | 0 | 0 | 0 |
| 452 | Human | Northern | 0 | 0 | 0 | 0 | 0 | 0 |
| 453 | Human | Northern | 0 | 0 | 0 | 0 | 0 | 0 |
| 454 | Human | Northern | 0 | 0 | 0 | 0 | 0 | 0 |
| 455 | Human | Northern | 0 | 0 | 0 | 0 | 0 | 0 |
| 456 | Human | Northern | 0 | 0 | 0 | 0 | 0 | 0 |
| 457 | Human | Northern | 0 | 0 | 0 | 0 | 0 | 0 |
| 458 | Human | Northern | 0 | 0 | 0 | 0 | 0 | 0 |
| 459 | Human | Northern | 0 | 0 | 0 | 0 | 0 | 0 |
| 460 | Human | Northern | 0 | 0 | 0 | 0 | 0 | 0 |
| 461 | Human | Northern | 0 | 0 | 0 | 0 | 0 | 0 |
| 462 | Human | Northern | 0 | 0 | 0 | 0 | 0 | 0 |
| 463 | Human | Northern | 0 | 0 | 0 | 0 | 0 | 1 |
| 464 | Human | Northern | 0 | 0 | 0 | 0 | 0 | 1 |
| 465 | Human | Northern | 0 | 0 | 0 | 0 | 0 | 0 |
| 466 | Human | Northern | 0 | 0 | 0 | 0 | 0 | 0 |
| 467 | Human | Northern | 0 | 0 | 0 | 0 | 0 | 0 |
| 468 | Human | Northern | 0 | 0 | 0 | 0 | 0 | 0 |
| 469 | Human | Northern | 0 | 0 | 0 | 0 | 0 | 0 |
| 470 | Human | Northern | 0 | 0 | 0 | 0 | 0 | 0 |
| 471 | Human | Northern | 0 | 0 | 0 | 0 | 0 | 0 |
| 472 | Human | Northern | 0 | 0 | 0 | 0 | 0 | 0 |
| 473 | Human | Northern | 0 | 0 | 0 | 0 | 0 | 0 |
| 474 | Human | Northern | 0 | 0 | 0 | 0 | 0 | 0 |
| 475 | Human | Northern | 0 | 0 | 0 | 0 | 0 | 0 |
| 476 | Human | Northern | 0 | 0 | 0 | 0 | 0 | 0 |
| 477 | Human | Northern | 0 | 0 | 0 | 0 | 0 | 0 |
| 478 | Human | Northern | 0 | 0 | 0 | 0 | 0 | 0 |
| 479 | Human | Northern | 0 | 0 | 0 | 0 | 0 | 0 |

|     |       |              |   |   |   |   |   |   |
|-----|-------|--------------|---|---|---|---|---|---|
| 480 | Human | Northern     | 0 | 0 | 0 | 0 | 0 | 0 |
| 481 | Human | Northern     | 0 | 0 | 0 | 0 | 0 | 0 |
| 482 | Human | Northern     | 0 | 0 | 0 | 0 | 0 | 0 |
| 483 | Human | Northern     | 0 | 0 | 0 | 0 | 0 | 0 |
| 484 | Human | Northern     | 0 | 0 | 0 | 0 | 0 | 0 |
| 485 | Human | Northern     | 0 | 0 | 0 | 0 | 0 | 0 |
| 486 | Human | Northern     | 0 | 0 | 0 | 0 | 0 | 0 |
| 487 | Human | Northern     | 0 | 0 | 0 | 0 | 0 | 0 |
| 488 | Human | Northern     | 0 | 0 | 0 | 0 | 0 | 0 |
| 489 | Human | Northern     | 0 | 0 | 0 | 0 | 0 | 0 |
| 490 | Human | Northern     | 0 | 0 | 0 | 0 | 0 | 0 |
| 491 | Human | Northern     | 0 | 0 | 0 | 0 | 0 | 0 |
| 492 | Human | Northern     | 0 | 0 | 0 | 0 | 0 | 0 |
| 493 | Human | Northern     | 0 | 0 | 0 | 1 | 0 | 1 |
| 494 | Human | Northern     | 0 | 0 | 0 | 0 | 0 | 0 |
| 495 | Human | Northern     | 0 | 0 | 0 | 0 | 0 | 0 |
| 496 | Human | Northern     | 0 | 0 | 0 | 0 | 0 | 0 |
| 497 | Human | Northern     | 0 | 0 | 0 | 0 | 0 | 0 |
| 498 | Human | Northern     | 0 | 0 | 0 | 0 | 0 | 0 |
| 499 | Human | Northern     | 0 | 0 | 0 | 0 | 0 | 0 |
| 500 | Human | Northern     | 0 | 0 | 0 | 0 | 0 | 0 |
| 501 | Human | Northern     | 0 | 0 | 0 | 0 | 0 | 0 |
| 502 | Human | Northern     | 0 | 0 | 0 | 0 | 0 | 0 |
| 503 | Human | Northern     | 0 | 0 | 0 | 0 | 0 | 0 |
| 504 | Human | Northern     | 0 | 0 | 0 | 0 | 0 | 0 |
| 505 | Human | Central      | 0 | 0 | 0 | 0 | 0 | 0 |
| 506 | Human | Central      | 0 | 0 | 0 | 0 | 0 | 0 |
| 507 | Human | Northern     | 0 | 0 | 0 | 1 | 0 | 1 |
| 508 | Human | Central      | 0 | 0 | 0 | 0 | 0 | 0 |
| 509 | Human | Central      | 0 | 0 | 0 | 0 | 0 | 0 |
| 510 | Human | Central      | 0 | 0 | 0 | 0 | 0 | 0 |
| 511 | Human | Central      | 0 | 0 | 0 | 0 | 0 | 0 |
| 512 | Human | Central      | 0 | 0 | 0 | 0 | 0 | 0 |
| 513 | Human | Eastern      | 0 | 0 | 0 | 0 | 0 | 0 |
| 514 | Human | Central      | 0 | 0 | 0 | 0 | 0 | 0 |
| 515 | Human | Central      | 0 | 0 | 0 | 0 | 0 | 0 |
| 516 | Human | Northern     | 0 | 0 | 0 | 0 | 0 | 0 |
| 517 | Human | Eastern      | 0 | 0 | 0 | 0 | 0 | 0 |
| 518 | Human | Central      | 0 | 0 | 0 | 0 | 0 | 0 |
| 519 | Human | Central      | 0 | 0 | 0 | 0 | 0 | 1 |
| 520 | Human | Central      | 0 | 0 | 0 | 0 | 0 | 0 |
| 521 | Human | Central      | 0 | 0 | 0 | 0 | 0 | 1 |
| 522 | Human | Northeastern | 1 | 1 | 0 | 1 | 0 | 1 |
| 523 | Human | Northeastern | 1 | 0 | 0 | 0 | 0 | 1 |
| 524 | Human | Northeastern | 0 | 0 | 0 | 0 | 0 | 0 |
| 525 | Human | Northeastern | 0 | 0 | 0 | 0 | 0 | 0 |
| 526 | Human | Northeastern | 0 | 0 | 0 | 0 | 0 | 0 |
| 527 | Human | Northeastern | 0 | 0 | 0 | 0 | 0 | 0 |

|     |       |              |   |   |   |   |   |   |
|-----|-------|--------------|---|---|---|---|---|---|
| 528 | Human | Northeastern | 0 | 0 | 0 | 0 | 0 | 0 |
| 529 | Human | Northeastern | 1 | 0 | 0 | 0 | 0 | 1 |
| 530 | Human | Eastern      | 0 | 0 | 0 | 0 | 0 | 0 |
| 531 | Human | Central      | 0 | 0 | 0 | 0 | 0 | 0 |
| 532 | Human | Central      | 0 | 0 | 0 | 0 | 0 | 0 |
| 533 | Human | Northern     | 0 | 0 | 0 | 0 | 0 | 0 |
| 534 | Human | Northern     | 0 | 0 | 0 | 0 | 0 | 0 |
| 535 | Human | Eastern      | 0 | 0 | 0 | 0 | 0 | 0 |
| 536 | Human | Central      | 0 | 0 | 0 | 0 | 0 | 0 |
| 537 | Human | Central      | 0 | 0 | 0 | 0 | 0 | 0 |
| 538 | Human | Northern     | 0 | 0 | 0 | 0 | 0 | 0 |
| 539 | Human | Northern     | 0 | 0 | 0 | 0 | 0 | 1 |
| 540 | Human | Eastern      | 0 | 0 | 0 | 0 | 0 | 0 |
| 541 | Human | Central      | 0 | 0 | 0 | 0 | 0 | 0 |
| 542 | Human | Eastern      | 0 | 0 | 0 | 0 | 0 | 0 |
| 543 | Human | Northern     | 1 | 0 | 0 | 0 | 0 | 1 |
| 544 | Human | Northern     | 0 | 0 | 0 | 1 | 0 | 1 |
| 545 | Human | Eastern      | 0 | 0 | 0 | 0 | 0 | 0 |
| 546 | Human | Northeastern | 0 | 0 | 0 | 1 | 0 | 1 |
| 547 | Human | Northeastern | 0 | 0 | 0 | 0 | 0 | 0 |
| 548 | Human | Northeastern | 0 | 0 | 0 | 0 | 0 | 1 |
| 549 | Human | Northeastern | 0 | 0 | 0 | 0 | 0 | 1 |
| 550 | Human | Northeastern | 0 | 0 | 0 | 1 | 0 | 1 |
| 551 | Human | Northeastern | 1 | 0 | 0 | 1 | 0 | 1 |
| 552 | Human | Central      | 0 | 0 | 0 | 0 | 0 | 0 |
| 553 | Human | Northern     | 0 | 0 | 0 | 0 | 0 | 0 |
| 554 | Human | Northeastern | 0 | 0 | 0 | 0 | 0 | 0 |
| 555 | Human | Central      | 0 | 0 | 0 | 0 | 0 | 0 |
| 556 | Human | Northeastern | 0 | 0 | 0 | 0 | 0 | 0 |
| 557 | Human | Northeastern | 1 | 0 | 0 | 0 | 0 | 1 |
| 558 | Human | Northeastern | 0 | 0 | 0 | 0 | 0 | 0 |
| 559 | Human | Northeastern | 0 | 0 | 0 | 0 | 0 | 0 |
| 560 | Human | Northeastern | 0 | 0 | 0 | 0 | 0 | 0 |
| 561 | Human | Northeastern | 0 | 0 | 0 | 0 | 0 | 0 |
| 562 | Human | Northeastern | 0 | 0 | 0 | 0 | 0 | 0 |
| 563 | Human | Northeastern | 0 | 0 | 0 | 1 | 0 | 1 |
| 564 | Human | Northeastern | 0 | 0 | 0 | 0 | 0 | 0 |
| 565 | Human | Northeastern | 0 | 0 | 0 | 1 | 0 | 1 |
| 566 | Human | Northeastern | 0 | 0 | 0 | 0 | 0 | 0 |
| 567 | Human | Northeastern | 0 | 0 | 0 | 0 | 0 | 0 |
| 568 | Human | Northeastern | 0 | 0 | 0 | 0 | 0 | 0 |
| 569 | Human | Northeastern | 0 | 0 | 0 | 0 | 0 | 0 |
| 570 | Human | Northeastern | 1 | 0 | 0 | 0 | 0 | 1 |
| 571 | Human | Northeastern | 0 | 0 | 0 | 0 | 0 | 1 |
| 572 | Human | Northeastern | 1 | 0 | 0 | 0 | 0 | 1 |
| 573 | Human | Northern     | 0 | 0 | 0 | 0 | 0 | 0 |
| 574 | Human | Central      | 0 | 0 | 0 | 0 | 0 | 0 |
| 575 | Human | Central      | 0 | 0 | 0 | 0 | 0 | 0 |

|     |       |              |   |   |   |   |   |   |
|-----|-------|--------------|---|---|---|---|---|---|
| 576 | Human | Northern     | 0 | 0 | 0 | 0 | 0 | 0 |
| 577 | Human | Central      | 0 | 0 | 0 | 0 | 0 | 0 |
| 578 | Human | Northeastern | 0 | 0 | 0 | 0 | 0 | 0 |
| 579 | Human | Northern     | 0 | 0 | 0 | 0 | 0 | 0 |
| 580 | Human | Central      | 0 | 0 | 0 | 0 | 0 | 0 |
| 581 | Human | Central      | 0 | 0 | 0 | 0 | 0 | 0 |
| 582 | Human | Eastern      | 0 | 0 | 0 | 1 | 0 | 1 |
| 583 | Human | Southern     | 0 | 0 | 0 | 0 | 0 | 0 |
| 584 | Human | Central      | 0 | 0 | 0 | 0 | 0 | 0 |
| 585 | Human | Northern     | 0 | 0 | 0 | 1 | 0 | 1 |
| 586 | Human | Northern     | 1 | 0 | 0 | 0 | 0 | 1 |
| 587 | Human | Northern     | 1 | 0 | 0 | 0 | 0 | 1 |
| 588 | Human | Northern     | 0 | 0 | 0 | 0 | 0 | 0 |
| 589 | Human | Northern     | 0 | 0 | 0 | 0 | 0 | 0 |
| 590 | Human | Northern     | 0 | 0 | 0 | 0 | 0 | 0 |
| 591 | Human | Northern     | 0 | 0 | 0 | 0 | 0 | 0 |
| 592 | Human | Northern     | 0 | 0 | 0 | 1 | 0 | 1 |
| 593 | Human | Northern     | 0 | 0 | 0 | 1 | 0 | 1 |
| 594 | Human | Northern     | 0 | 0 | 0 | 0 | 0 | 0 |
| 595 | Human | Northern     | 0 | 0 | 0 | 0 | 0 | 0 |
| 596 | Human | Northern     | 0 | 1 | 0 | 0 | 0 | 1 |
| 597 | Human | Northern     | 0 | 0 | 0 | 0 | 0 | 0 |
| 598 | Human | Central      | 1 | 0 | 0 | 1 | 0 | 1 |
| 599 | Human | Central      | 0 | 0 | 0 | 0 | 0 | 0 |
| 600 | Human | Central      | 0 | 0 | 0 | 0 | 0 | 0 |
| 601 | Human | Northern     | 0 | 0 | 0 | 0 | 0 | 0 |
| 602 | Human | Northern     | 0 | 0 | 0 | 0 | 0 | 0 |
| 603 | Human | Northern     | 0 | 0 | 0 | 0 | 0 | 0 |
| 604 | Human | Northern     | 0 | 0 | 0 | 1 | 0 | 1 |
| 605 | Human | Northern     | 0 | 0 | 0 | 1 | 0 | 1 |
| 606 | Human | Northern     | 0 | 0 | 0 | 0 | 0 | 0 |
| 607 | Human | Northern     | 0 | 0 | 0 | 0 | 0 | 0 |
| 608 | Human | Northern     | 1 | 0 | 0 | 0 | 0 | 1 |
| 609 | Human | Northern     | 0 | 0 | 0 | 0 | 0 | 0 |
| 610 | Human | Northern     | 0 | 0 | 0 | 0 | 0 | 0 |
| 611 | Human | Northern     | 0 | 0 | 0 | 0 | 0 | 0 |
| 612 | Human | Northern     | 0 | 0 | 0 | 0 | 0 | 0 |
| 613 | Human | Northern     | 0 | 0 | 0 | 0 | 0 | 0 |
| 614 | Human | Northern     | 0 | 0 | 0 | 0 | 0 | 0 |
| 615 | Human | Northern     | 0 | 0 | 0 | 0 | 0 | 0 |
| 616 | Human | Northern     | 0 | 0 | 0 | 0 | 0 | 0 |
| 617 | Human | Northern     | 0 | 0 | 0 | 0 | 0 | 0 |
| 618 | Human | Northern     | 0 | 0 | 0 | 0 | 0 | 0 |
| 619 | Human | Northern     | 0 | 0 | 0 | 0 | 0 | 0 |
| 620 | Human | Northern     | 0 | 0 | 0 | 0 | 0 | 0 |
| 621 | Human | Northern     | 0 | 0 | 0 | 0 | 0 | 0 |
| 622 | Human | Southern     | 0 | 0 | 0 | 1 | 0 | 1 |
| 623 | Human | Northern     | 0 | 0 | 0 | 0 | 0 | 0 |

|     |       |              |   |   |   |   |   |   |
|-----|-------|--------------|---|---|---|---|---|---|
| 624 | Human | Northern     | 1 | 0 | 0 | 0 | 0 | 1 |
| 625 | Human | Northern     | 0 | 0 | 0 | 0 | 0 | 0 |
| 626 | Human | Northern     | 0 | 0 | 0 | 1 | 0 | 1 |
| 627 | Human | Southern     | 0 | 0 | 0 | 0 | 0 | 0 |
| 628 | Human | Central      | 0 | 0 | 0 | 0 | 0 | 0 |
| 629 | Human | Central      | 0 | 0 | 0 | 0 | 0 | 0 |
| 630 | Human | Central      | 0 | 0 | 0 | 0 | 0 | 0 |
| 631 | Human | Southern     | 0 | 0 | 0 | 0 | 0 | 0 |
| 632 | Human | Northeastern | 0 | 0 | 0 | 1 | 0 | 1 |
| 633 | Human | Northeastern | 0 | 0 | 0 | 0 | 0 | 0 |
| 634 | Human | Northeastern | 0 | 1 | 0 | 1 | 0 | 1 |
| 635 | Human | Northeastern | 0 | 0 | 0 | 0 | 0 | 0 |
| 636 | Human | Northeastern | 0 | 0 | 0 | 0 | 0 | 1 |
| 637 | Human | Northeastern | 0 | 0 | 0 | 0 | 0 | 0 |
| 638 | Human | Northeastern | 0 | 0 | 0 | 0 | 0 | 0 |
| 639 | Human | Northeastern | 0 | 0 | 0 | 0 | 0 | 0 |
| 640 | Human | Eastern      | 0 | 0 | 0 | 0 | 0 | 0 |
| 641 | Human | Central      | 0 | 0 | 0 | 0 | 0 | 0 |
| 642 | Human | Central      | 0 | 0 | 0 | 0 | 0 | 0 |
| 643 | Human | Southern     | 0 | 0 | 0 | 0 | 0 | 0 |
| 644 | Human | Northern     | 0 | 0 | 0 | 0 | 0 | 0 |
| 645 | Human | Northern     | 0 | 0 | 0 | 1 | 0 | 1 |
| 646 | Human | Northern     | 1 | 0 | 0 | 0 | 0 | 1 |
| 647 | Human | Eastern      | 0 | 0 | 0 | 0 | 0 | 0 |
| 648 | Human | Southern     | 0 | 0 | 0 | 0 | 1 | 1 |
| 649 | Human | Southern     | 0 | 0 | 0 | 0 | 1 | 1 |
| 650 | Human | Southern     | 0 | 0 | 0 | 0 | 1 | 1 |
| 651 | Human | Southern     | 0 | 0 | 0 | 0 | 1 | 1 |
| 652 | Human | Southern     | 0 | 0 | 0 | 0 | 0 | 1 |
| 653 | Human | Southern     | 0 | 0 | 0 | 0 | 1 | 1 |
| 654 | Human | Southern     | 0 | 0 | 0 | 0 | 1 | 1 |
| 655 | Human | Southern     | 0 | 0 | 0 | 0 | 1 | 1 |
| 656 | Human | Southern     | 0 | 0 | 0 | 1 | 1 | 1 |
| 657 | Human | Southern     | 0 | 0 | 0 | 0 | 1 | 1 |
| 658 | Human | Southern     | 0 | 0 | 0 | 0 | 0 | 1 |
| 659 | Human | Southern     | 0 | 0 | 0 | 0 | 0 | 1 |
| 660 | Human | Southern     | 0 | 0 | 0 | 0 | 0 | 0 |
| 661 | Human | Southern     | 0 | 0 | 0 | 0 | 1 | 1 |
| 662 | Human | Southern     | 0 | 0 | 0 | 0 | 1 | 1 |
| 663 | Human | Southern     | 0 | 0 | 0 | 0 | 1 | 1 |
| 664 | Human | Southern     | 0 | 0 | 0 | 0 | 1 | 1 |
| 665 | Human | Southern     | 0 | 0 | 0 | 0 | 0 | 0 |
| 666 | Human | Eastern      | 0 | 0 | 0 | 0 | 0 | 0 |
| 667 | Human | Northeastern | 0 | 0 | 0 | 0 | 0 | 0 |
| 668 | Human | Southern     | 0 | 0 | 0 | 0 | 0 | 0 |
| 669 | Human | Southern     | 0 | 0 | 0 | 0 | 0 | 0 |
| 670 | Human | Eastern      | 0 | 0 | 0 | 0 | 0 | 0 |
| 671 | Human | Eastern      | 0 | 0 | 0 | 0 | 0 | 0 |

|     |       |              |   |   |   |   |   |   |
|-----|-------|--------------|---|---|---|---|---|---|
| 672 | Human | Eastern      | 0 | 0 | 0 | 0 | 0 | 0 |
| 673 | Human | Central      | 0 | 0 | 0 | 0 | 0 | 0 |
| 674 | Human | Northeastern | 0 | 0 | 0 | 1 | 0 | 1 |
| 675 | Human | Northeastern | 0 | 0 | 0 | 0 | 0 | 0 |
| 676 | Human | Eastern      | 0 | 0 | 0 | 0 | 0 | 0 |
| 677 | Human | Eastern      | 0 | 0 | 0 | 0 | 0 | 0 |
| 678 | Human | Eastern      | 0 | 0 | 0 | 0 | 0 | 0 |
| 679 | Human | Northeastern | 0 | 0 | 0 | 0 | 0 | 0 |
| 680 | Human | Northeastern | 1 | 0 | 0 | 0 | 0 | 1 |
| 681 | Human | Northeastern | 0 | 0 | 0 | 0 | 0 | 0 |
| 682 | Human | Northeastern | 0 | 0 | 0 | 0 | 0 | 0 |
| 683 | Human | Southern     | 0 | 0 | 0 | 0 | 0 | 0 |
| 684 | Human | Northeastern | 0 | 0 | 0 | 0 | 0 | 0 |
| 685 | Human | Eastern      | 0 | 0 | 0 | 0 | 0 | 0 |
| 686 | Human | Eastern      | 0 | 0 | 0 | 0 | 0 | 0 |
| 687 | Human | Eastern      | 0 | 0 | 0 | 0 | 0 | 0 |
| 688 | Human | Southern     | 0 | 0 | 0 | 0 | 0 | 0 |
| 689 | Human | Northeastern | 1 | 0 | 0 | 0 | 0 | 1 |
| 690 | Human | Northeastern | 0 | 0 | 0 | 1 | 0 | 1 |
| 691 | Human | Southern     | 0 | 0 | 0 | 0 | 0 | 0 |
| 692 | Human | Southern     | 0 | 0 | 0 | 1 | 0 | 1 |
| 693 | Human | Southern     | 0 | 0 | 0 | 1 | 0 | 1 |
| 694 | Human | Southern     | 0 | 0 | 0 | 1 | 0 | 1 |
| 695 | Human | Southern     | 0 | 0 | 0 | 0 | 0 | 0 |
| 696 | Human | Central      | 0 | 0 | 0 | 0 | 0 | 0 |
| 697 | Human | Northeastern | 0 | 0 | 0 | 1 | 0 | 1 |
| 698 | Human | Eastern      | 0 | 0 | 0 | 1 | 0 | 1 |
| 699 | Human | Southern     | 0 | 0 | 0 | 1 | 0 | 1 |
| 700 | Human | Central      | 0 | 0 | 0 | 0 | 0 | 0 |
| 701 | Human | Central      | 0 | 0 | 0 | 0 | 0 | 0 |
| 702 | Human | Central      | 0 | 0 | 0 | 0 | 0 | 0 |
| 703 | Human | Southern     | 0 | 0 | 0 | 0 | 0 | 0 |
| 704 | Human | Southern     | 0 | 0 | 0 | 0 | 0 | 0 |
| 705 | Human | Southern     | 0 | 0 | 0 | 0 | 0 | 0 |
| 706 | Human | Southern     | 0 | 0 | 0 | 0 | 0 | 0 |
| 707 | Human | Southern     | 1 | 0 | 0 | 0 | 0 | 1 |
| 708 | Human | Southern     | 0 | 0 | 0 | 0 | 0 | 0 |
| 709 | Human | Central      | 0 | 0 | 0 | 0 | 0 | 0 |
| 710 | Human | Southern     | 0 | 0 | 0 | 0 | 0 | 0 |
| 711 | Human | Southern     | 0 | 0 | 0 | 0 | 0 | 0 |
| 712 | Human | Southern     | 0 | 0 | 0 | 1 | 0 | 1 |
| 713 | Human | Southern     | 0 | 0 | 0 | 1 | 0 | 1 |
| 714 | Human | Southern     | 0 | 0 | 0 | 0 | 0 | 0 |
| 715 | Human | Central      | 0 | 0 | 0 | 0 | 0 | 0 |
| 716 | Human | Northeastern | 0 | 0 | 0 | 0 | 0 | 0 |
| 717 | Human | Northeastern | 0 | 0 | 0 | 0 | 0 | 0 |
| 718 | Human | Northeastern | 0 | 0 | 0 | 0 | 0 | 0 |
| 719 | Human | Northeastern | 0 | 0 | 0 | 0 | 0 | 0 |

|     |       |              |   |   |   |   |   |   |
|-----|-------|--------------|---|---|---|---|---|---|
| 720 | Human | Eastern      | 0 | 0 | 0 | 0 | 0 | 0 |
| 721 | Human | Eastern      | 0 | 0 | 0 | 0 | 0 | 0 |
| 722 | Human | Central      | 0 | 0 | 0 | 1 | 0 | 1 |
| 723 | Human | Northeastern | 0 | 0 | 0 | 0 | 0 | 0 |
| 724 | Human | Eastern      | 0 | 0 | 0 | 0 | 0 | 0 |
| 725 | Human | Eastern      | 0 | 0 | 0 | 0 | 0 | 0 |
| 726 | Human | Central      | 0 | 0 | 0 | 1 | 0 | 1 |
| 727 | Human | Central      | 0 | 0 | 0 | 1 | 0 | 1 |
| 728 | Human | Central      | 0 | 0 | 0 | 1 | 0 | 1 |
| 729 | Human | Central      | 0 | 0 | 0 | 1 | 0 | 1 |
| 730 | Human | Central      | 0 | 0 | 0 | 0 | 0 | 0 |
| 731 | Human | Central      | 0 | 0 | 0 | 0 | 0 | 0 |
| 732 | Human | Southern     | 0 | 0 | 0 | 0 | 0 | 0 |
| 733 | Human | Southern     | 0 | 0 | 0 | 0 | 0 | 0 |
| 734 | Human | Southern     | 0 | 0 | 0 | 0 | 0 | 0 |
| 735 | Human | Southern     | 0 | 0 | 0 | 0 | 0 | 0 |
| 736 | Human | Southern     | 0 | 0 | 0 | 1 | 0 | 1 |
| 737 | Human | Southern     | 0 | 0 | 0 | 0 | 0 | 0 |
| 738 | Human | Southern     | 0 | 0 | 0 | 0 | 0 | 0 |
| 739 | Human | Southern     | 0 | 0 | 0 | 0 | 0 | 0 |
| 740 | Human | Eastern      | 0 | 0 | 0 | 0 | 0 | 0 |
| 741 | Human | Eastern      | 0 | 0 | 0 | 0 | 0 | 0 |
| 742 | Human | Northeastern | 0 | 0 | 0 | 1 | 0 | 1 |
| 743 | Human | Northeastern | 0 | 0 | 0 | 1 | 0 | 1 |
| 744 | Human | Northeastern | 0 | 0 | 0 | 0 | 0 | 0 |
| 745 | Human | Northeastern | 0 | 0 | 0 | 0 | 0 | 0 |
| 746 | Human | Northeastern | 0 | 0 | 0 | 1 | 0 | 1 |
| 747 | Human | Northeastern | 1 | 0 | 0 | 0 | 0 | 1 |
| 748 | Human | Northern     | 0 | 0 | 0 | 0 | 0 | 0 |
| 749 | Human | Northern     | 0 | 0 | 0 | 0 | 0 | 0 |
| 750 | Human | Northern     | 0 | 0 | 0 | 0 | 0 | 0 |
| 751 | Human | Northern     | 0 | 0 | 0 | 0 | 0 | 0 |
| 752 | Human | Northern     | 0 | 0 | 0 | 0 | 0 | 0 |
| 753 | Human | Northern     | 0 | 0 | 0 | 0 | 0 | 0 |
| 754 | Human | Northern     | 0 | 0 | 0 | 0 | 0 | 0 |
| 755 | Human | Northern     | 0 | 0 | 0 | 0 | 0 | 0 |
| 756 | Human | Northern     | 0 | 0 | 0 | 0 | 0 | 0 |
| 757 | Human | Northern     | 0 | 0 | 0 | 0 | 0 | 0 |
| 758 | Human | Northern     | 0 | 0 | 0 | 0 | 0 | 0 |
| 759 | Human | Northern     | 0 | 0 | 0 | 0 | 0 | 0 |
| 760 | Human | Northern     | 0 | 0 | 0 | 0 | 0 | 0 |
| 761 | Human | Northern     | 0 | 0 | 0 | 0 | 0 | 0 |
| 762 | Human | Northern     | 0 | 0 | 0 | 0 | 0 | 0 |
| 763 | Human | Northern     | 0 | 0 | 0 | 0 | 0 | 0 |
| 764 | Human | Northern     | 0 | 0 | 0 | 0 | 0 | 0 |
| 765 | Human | Northern     | 0 | 0 | 0 | 0 | 0 | 0 |
| 766 | Human | Northern     | 0 | 0 | 0 | 0 | 0 | 0 |
| 767 | Human | Northern     | 0 | 0 | 0 | 0 | 0 | 0 |



|     |       |              |   |   |   |   |   |   |
|-----|-------|--------------|---|---|---|---|---|---|
| 768 | Human | Northern     | 0 | 0 | 0 | 0 | 0 | 0 |
| 769 | Human | Northern     | 0 | 0 | 0 | 0 | 0 | 0 |
| 770 | Human | Northern     | 0 | 0 | 0 | 0 | 0 | 0 |
| 771 | Human | Central      | 0 | 0 | 0 | 0 | 0 | 0 |
| 772 | Human | Eastern      | 0 | 0 | 0 | 0 | 0 | 0 |
| 773 | Human | Central      | 0 | 0 | 0 | 0 | 0 | 0 |
| 774 | Human | Southern     | 0 | 0 | 0 | 0 | 0 | 0 |
| 775 | Human | Southern     | 0 | 0 | 0 | 0 | 0 | 0 |
| 776 | Human | Central      | 0 | 0 | 0 | 0 | 0 | 0 |
| 777 | Human | Eastern      | 0 | 0 | 0 | 0 | 0 | 0 |
| 778 | Human | Central      | 0 | 0 | 0 | 0 | 0 | 0 |
| 779 | Human | Central      | 0 | 0 | 0 | 0 | 0 | 0 |
| 780 | Human | Northeastern | 0 | 0 | 0 | 0 | 0 | 0 |
| 781 | Human | Northeastern | 0 | 0 | 0 | 0 | 0 | 0 |
| 782 | Human | Northeastern | 0 | 0 | 0 | 0 | 0 | 0 |
| 783 | Human | Northeastern | 0 | 0 | 0 | 1 | 0 | 1 |
| 784 | Human | Northeastern | 0 | 0 | 0 | 0 | 0 | 0 |
| 785 | Human | Central      | 0 | 0 | 0 | 0 | 0 | 0 |
| 786 | Human | Southern     | 0 | 0 | 0 | 0 | 0 | 0 |
| 787 | Human | Northeastern | 0 | 0 | 0 | 0 | 0 | 0 |
| 788 | Human | Northeastern | 0 | 0 | 0 | 0 | 0 | 0 |
| 789 | Human | Northeastern | 0 | 0 | 0 | 0 | 0 | 0 |
| 790 | Human | Central      | 0 | 0 | 0 | 0 | 0 | 0 |
| 791 | Human | Central      | 0 | 0 | 0 | 1 | 0 | 1 |
| 792 | Human | Central      | 0 | 0 | 0 | 1 | 0 | 1 |
| 793 | Human | Central      | 0 | 0 | 0 | 0 | 0 | 0 |
| 794 | Human | Northeastern | 0 | 0 | 0 | 0 | 0 | 0 |
| 795 | Human | Northeastern | 0 | 0 | 0 | 0 | 0 | 0 |
| 796 | Human | Northeastern | 0 | 0 | 0 | 0 | 0 | 0 |
| 797 | Human | Central      | 0 | 0 | 0 | 0 | 0 | 0 |
| 798 | Human | Central      | 0 | 0 | 0 | 0 | 0 | 0 |
| 799 | Human | Central      | 0 | 0 | 0 | 0 | 0 | 0 |
| 800 | Human | Southern     | 0 | 0 | 0 | 0 | 0 | 0 |
| 801 | Human | Southern     | 0 | 0 | 0 | 0 | 0 | 0 |
| 802 | Human | Eastern      | 0 | 0 | 0 | 0 | 0 | 0 |
| 803 | Human | Central      | 0 | 0 | 0 | 0 | 0 | 0 |
| 804 | Human | Central      | 0 | 0 | 0 | 0 | 0 | 0 |
| 805 | Human | Southern     | 0 | 0 | 0 | 0 | 0 | 0 |
| 806 | Human | Central      | 0 | 0 | 0 | 0 | 0 | 0 |
| 807 | Human | Central      | 0 | 0 | 0 | 0 | 0 | 0 |
| 808 | Human | Central      | 1 | 0 | 0 | 0 | 0 | 1 |
| 809 | Human | Central      | 0 | 0 | 0 | 0 | 0 | 0 |
| 810 | Human | Central      | 0 | 0 | 0 | 0 | 0 | 0 |
| 811 | Human | Central      | 0 | 0 | 0 | 0 | 0 | 1 |
| 812 | Human | Central      | 1 | 0 | 0 | 0 | 0 | 1 |
| 813 | Human | Central      | 0 | 0 | 0 | 0 | 0 | 0 |
| 814 | Human | Central      | 1 | 0 | 0 | 0 | 0 | 1 |
| 815 | Human | Central      | 0 | 0 | 0 | 0 | 0 | 0 |

|     |       |              |   |   |   |   |   |   |
|-----|-------|--------------|---|---|---|---|---|---|
| 816 | Human | Central      | 0 | 0 | 0 | 0 | 0 | 0 |
| 817 | Human | Central      | 1 | 0 | 0 | 1 | 0 | 1 |
| 818 | Human | Central      | 0 | 0 | 0 | 0 | 0 | 1 |
| 819 | Human | Central      | 0 | 0 | 0 | 0 | 0 | 0 |
| 820 | Human | Central      | 0 | 0 | 0 | 0 | 0 | 0 |
| 821 | Human | Central      | 0 | 0 | 0 | 0 | 0 | 0 |
| 822 | Human | Central      | 0 | 0 | 0 | 0 | 0 | 1 |
| 823 | Human | Central      | 0 | 0 | 0 | 0 | 0 | 0 |
| 824 | Human | Central      | 0 | 0 | 0 | 0 | 0 | 1 |
| 825 | Human | Central      | 0 | 0 | 0 | 0 | 0 | 1 |
| 826 | Human | Central      | 0 | 0 | 0 | 1 | 0 | 1 |
| 827 | Human | Central      | 0 | 0 | 0 | 1 | 0 | 1 |
| 828 | Human | Central      | 0 | 0 | 0 | 1 | 0 | 1 |
| 829 | Human | Central      | 0 | 0 | 0 | 0 | 0 | 0 |
| 830 | Human | Central      | 1 | 0 | 0 | 1 | 0 | 1 |
| 831 | Human | Central      | 0 | 0 | 0 | 0 | 0 | 0 |
| 832 | Human | Central      | 0 | 0 | 0 | 0 | 0 | 0 |
| 833 | Human | Central      | 0 | 0 | 0 | 0 | 0 | 0 |
| 834 | Human | Central      | 0 | 0 | 0 | 0 | 0 | 1 |
| 835 | Human | Central      | 0 | 0 | 0 | 0 | 0 | 0 |
| 836 | Human | Central      | 0 | 0 | 0 | 0 | 0 | 0 |
| 837 | Human | Central      | 0 | 0 | 0 | 0 | 0 | 0 |
| 838 | Human | Central      | 1 | 0 | 0 | 0 | 0 | 1 |
| 839 | Human | Central      | 0 | 0 | 0 | 0 | 0 | 0 |
| 840 | Human | Central      | 0 | 0 | 0 | 0 | 0 | 1 |
| 841 | Human | Central      | 0 | 0 | 0 | 1 | 0 | 1 |
| 842 | Human | Central      | 0 | 0 | 0 | 1 | 0 | 1 |
| 843 | Human | Central      | 0 | 0 | 0 | 0 | 0 | 0 |
| 844 | Human | Central      | 0 | 0 | 0 | 0 | 0 | 1 |
| 845 | Human | Central      | 0 | 0 | 0 | 0 | 0 | 1 |
| 846 | Human | Central      | 0 | 0 | 0 | 0 | 0 | 1 |
| 847 | Human | Northeastern | 0 | 0 | 0 | 1 | 0 | 1 |
| 848 | Human | Northeastern | 1 | 0 | 0 | 0 | 0 | 1 |
| 849 | Human | Northeastern | 0 | 0 | 0 | 0 | 0 | 0 |
| 850 | Human | Northeastern | 0 | 0 | 0 | 1 | 0 | 1 |
| 851 | Human | Northeastern | 0 | 0 | 0 | 0 | 0 | 0 |
| 852 | Human | Northeastern | 0 | 0 | 0 | 0 | 0 | 0 |
| 853 | Human | Northeastern | 0 | 0 | 0 | 0 | 0 | 0 |
| 854 | Human | Northeastern | 0 | 0 | 0 | 0 | 0 | 0 |
| 855 | Human | Northeastern | 0 | 0 | 0 | 0 | 0 | 0 |
| 856 | Human | Northeastern | 0 | 0 | 0 | 0 | 0 | 0 |
| 857 | Human | Southern     | 0 | 0 | 0 | 0 | 0 | 0 |
| 858 | Human | Central      | 0 | 0 | 0 | 0 | 0 | 0 |
| 859 | Human | Central      | 0 | 0 | 0 | 0 | 0 | 0 |
| 860 | Human | Central      | 0 | 0 | 0 | 0 | 0 | 0 |
| 861 | Human | Central      | 0 | 0 | 0 | 0 | 0 | 0 |
| 862 | Human | Central      | 0 | 0 | 0 | 0 | 0 | 0 |
| 863 | Human | Central      | 0 | 0 | 0 | 0 | 0 | 0 |

|     |       |         |   |   |   |   |   |   |
|-----|-------|---------|---|---|---|---|---|---|
| 864 | Human | Central | 0 | 0 | 0 | 0 | 0 | 0 |
| 865 | Human | Central | 0 | 0 | 0 | 0 | 0 | 0 |
| 866 | Human | Central | 0 | 0 | 0 | 1 | 0 | 1 |
| 867 | Human | Central | 0 | 0 | 0 | 0 | 0 | 1 |
| 868 | Human | Central | 0 | 0 | 0 | 0 | 0 | 1 |
| 869 | Human | Central | 0 | 0 | 0 | 0 | 0 | 0 |
| 870 | Human | Central | 0 | 0 | 0 | 0 | 0 | 0 |
| 871 | Human | Central | 0 | 0 | 0 | 0 | 0 | 0 |
| 872 | Human | Central | 0 | 0 | 0 | 0 | 0 | 0 |
| 873 | Human | Central | 0 | 0 | 0 | 0 | 0 | 0 |
| 874 | Human | Central | 0 | 0 | 0 | 1 | 0 | 1 |
| 875 | Human | Central | 0 | 0 | 0 | 0 | 0 | 0 |
| 876 | Human | Central | 0 | 0 | 0 | 0 | 0 | 0 |
| 877 | Human | Central | 0 | 0 | 0 | 0 | 0 | 0 |
| 878 | Human | Central | 0 | 0 | 0 | 0 | 0 | 0 |
| 879 | Human | Central | 0 | 0 | 0 | 0 | 0 | 0 |
| 880 | Human | Central | 0 | 0 | 0 | 0 | 0 | 0 |
| 881 | Human | Central | 0 | 0 | 0 | 0 | 0 | 0 |
| 882 | Human | Central | 0 | 0 | 0 | 0 | 0 | 0 |
| 883 | Human | Central | 0 | 0 | 0 | 0 | 0 | 0 |
| 884 | Human | Central | 0 | 0 | 0 | 0 | 0 | 0 |
| 885 | Human | Central | 0 | 0 | 0 | 0 | 0 | 0 |
| 886 | Human | Central | 0 | 0 | 0 | 0 | 0 | 0 |
| 887 | Human | Central | 0 | 0 | 0 | 0 | 0 | 0 |
| 888 | Human | Central | 0 | 0 | 0 | 0 | 0 | 0 |
| 889 | Human | Central | 0 | 0 | 0 | 1 | 0 | 1 |
| 890 | Human | Central | 0 | 0 | 0 | 1 | 0 | 1 |
| 891 | Human | Central | 0 | 0 | 0 | 1 | 0 | 1 |
| 892 | Human | Central | 0 | 0 | 0 | 1 | 0 | 1 |
| 893 | Human | Central | 0 | 0 | 0 | 0 | 0 | 0 |
| 894 | Human | Central | 0 | 0 | 0 | 0 | 0 | 0 |
| 895 | Human | Central | 0 | 0 | 0 | 0 | 0 | 0 |
| 896 | Human | Central | 0 | 0 | 0 | 0 | 0 | 0 |
| 897 | Human | Central | 0 | 0 | 0 | 0 | 0 | 0 |
| 898 | Human | Central | 0 | 0 | 0 | 1 | 0 | 1 |
| 899 | Human | Central | 0 | 0 | 0 | 0 | 0 | 0 |
| 900 | Human | Central | 0 | 0 | 0 | 0 | 0 | 0 |
| 901 | Human | Central | 0 | 0 | 0 | 0 | 0 | 0 |
| 902 | Human | Central | 0 | 0 | 0 | 0 | 0 | 0 |
| 903 | Human | Central | 0 | 0 | 0 | 0 | 0 | 0 |
| 904 | Human | Central | 0 | 0 | 0 | 0 | 0 | 0 |
| 905 | Human | Central | 0 | 0 | 0 | 0 | 0 | 0 |
| 906 | Human | Central | 0 | 0 | 0 | 0 | 0 | 0 |
| 907 | Human | Central | 0 | 0 | 0 | 0 | 0 | 0 |
| 908 | Human | Central | 0 | 0 | 0 | 0 | 0 | 0 |
| 909 | Human | Central | 0 | 0 | 0 | 0 | 0 | 0 |
| 910 | Human | Central | 0 | 0 | 0 | 0 | 0 | 0 |
| 911 | Human | Central | 0 | 0 | 0 | 0 | 0 | 0 |

|     |       |         |   |   |   |   |   |   |
|-----|-------|---------|---|---|---|---|---|---|
| 912 | Human | Central | 0 | 0 | 0 | 1 | 0 | 1 |
| 913 | Human | Central | 0 | 0 | 0 | 0 | 0 | 0 |
| 914 | Human | Central | 0 | 0 | 0 | 0 | 0 | 0 |
| 915 | Human | Central | 0 | 0 | 0 | 0 | 0 | 0 |
| 916 | Human | Central | 0 | 0 | 0 | 0 | 0 | 0 |
| 917 | Human | Central | 0 | 0 | 0 | 1 | 0 | 1 |
| 918 | Human | Central | 0 | 0 | 0 | 1 | 0 | 1 |
| 919 | Human | Central | 0 | 0 | 0 | 0 | 0 | 0 |
| 920 | Human | Central | 0 | 0 | 0 | 1 | 0 | 1 |
| 921 | Human | Central | 0 | 0 | 0 | 0 | 0 | 0 |
| 922 | Human | Central | 0 | 0 | 0 | 0 | 0 | 1 |
| 923 | Human | Central | 0 | 0 | 0 | 0 | 0 | 0 |
| 924 | Human | Central | 0 | 0 | 0 | 0 | 0 | 1 |
| 925 | Human | Central | 0 | 0 | 0 | 0 | 0 | 0 |
| 926 | Human | Central | 0 | 0 | 0 | 1 | 0 | 1 |
| 927 | Human | Central | 0 | 0 | 0 | 1 | 0 | 1 |
| 928 | Human | Central | 0 | 0 | 0 | 0 | 0 | 1 |
| 929 | Human | Central | 0 | 0 | 0 | 1 | 0 | 1 |
| 930 | Human | Central | 0 | 0 | 0 | 1 | 0 | 1 |
| 931 | Human | Central | 0 | 0 | 0 | 0 | 0 | 0 |
| 932 | Human | Central | 0 | 0 | 0 | 0 | 0 | 0 |
| 933 | Human | Central | 0 | 0 | 0 | 0 | 0 | 1 |
| 934 | Human | Central | 0 | 0 | 0 | 0 | 0 | 1 |
| 935 | Human | Central | 0 | 0 | 0 | 1 | 0 | 1 |
| 936 | Human | Central | 0 | 0 | 0 | 1 | 0 | 1 |
| 937 | Human | Central | 0 | 0 | 0 | 0 | 0 | 0 |
| 938 | Human | Central | 0 | 0 | 0 | 0 | 0 | 1 |
| 939 | Human | Central | 0 | 0 | 0 | 0 | 0 | 0 |
| 940 | Human | Central | 0 | 0 | 0 | 1 | 0 | 1 |
| 941 | Human | Central | 0 | 1 | 0 | 0 | 0 | 1 |
| 942 | Human | Central | 0 | 1 | 0 | 1 | 0 | 1 |
| 943 | Human | Central | 0 | 0 | 0 | 0 | 0 | 0 |
| 944 | Human | Central | 0 | 0 | 0 | 0 | 0 | 0 |
| 945 | Human | Central | 0 | 0 | 0 | 0 | 0 | 0 |
| 946 | Human | Central | 0 | 0 | 0 | 0 | 0 | 0 |
| 947 | Human | Central | 0 | 0 | 0 | 0 | 0 | 0 |
| 948 | Human | Central | 0 | 0 | 0 | 0 | 0 | 0 |
| 949 | Human | Central | 0 | 0 | 0 | 0 | 0 | 0 |
| 950 | Human | Central | 0 | 0 | 0 | 0 | 0 | 0 |
| 951 | Human | Central | 0 | 0 | 0 | 0 | 0 | 0 |
| 952 | Human | Central | 0 | 0 | 0 | 0 | 0 | 0 |
| 953 | Human | Central | 0 | 0 | 0 | 0 | 0 | 0 |
| 954 | Human | Central | 0 | 0 | 0 | 0 | 0 | 0 |
| 955 | Human | Central | 0 | 0 | 0 | 0 | 0 | 0 |
| 956 | Human | Central | 0 | 0 | 0 | 0 | 0 | 0 |
| 957 | Human | Central | 0 | 0 | 0 | 0 | 0 | 0 |
| 958 | Human | Central | 0 | 0 | 0 | 1 | 0 | 1 |
| 959 | Human | Central | 0 | 0 | 0 | 0 | 0 | 0 |

|      |       |              |   |   |   |   |   |   |
|------|-------|--------------|---|---|---|---|---|---|
| 960  | Human | Central      | 0 | 0 | 0 | 0 | 0 | 0 |
| 961  | Human | Central      | 0 | 0 | 0 | 0 | 0 | 0 |
| 962  | Human | Central      | 0 | 0 | 0 | 1 | 0 | 1 |
| 963  | Human | Central      | 1 | 0 | 0 | 1 | 0 | 1 |
| 964  | Human | Central      | 1 | 0 | 0 | 1 | 0 | 1 |
| 965  | Human | Central      | 0 | 0 | 0 | 0 | 0 | 0 |
| 966  | Human | Central      | 0 | 0 | 0 | 0 | 0 | 0 |
| 967  | Human | Central      | 0 | 0 | 0 | 1 | 0 | 1 |
| 968  | Human | Central      | 0 | 0 | 0 | 1 | 0 | 1 |
| 969  | Human | Central      | 0 | 0 | 0 | 0 | 0 | 0 |
| 970  | Human | Central      | 0 | 0 | 0 | 0 | 0 | 0 |
| 971  | Human | Central      | 0 | 0 | 0 | 0 | 0 | 0 |
| 972  | Human | Central      | 0 | 0 | 0 | 0 | 0 | 0 |
| 973  | Human | Central      | 0 | 0 | 0 | 0 | 0 | 0 |
| 974  | Human | Central      | 0 | 0 | 0 | 1 | 0 | 1 |
| 975  | Human | Central      | 0 | 0 | 0 | 0 | 0 | 0 |
| 976  | Human | Central      | 0 | 0 | 0 | 0 | 0 | 0 |
| 977  | Human | Central      | 0 | 0 | 0 | 0 | 0 | 0 |
| 978  | Human | Central      | 0 | 0 | 0 | 0 | 0 | 0 |
| 979  | Human | Central      | 0 | 0 | 0 | 0 | 0 | 0 |
| 980  | Human | Central      | 0 | 0 | 0 | 0 | 0 | 0 |
| 981  | Human | Central      | 0 | 0 | 0 | 0 | 0 | 0 |
| 982  | Human | Central      | 1 | 0 | 0 | 0 | 0 | 1 |
| 983  | Human | Central      | 0 | 0 | 0 | 0 | 0 | 0 |
| 984  | Human | Central      | 0 | 0 | 0 | 0 | 0 | 0 |
| 985  | Human | Central      | 0 | 0 | 0 | 0 | 0 | 0 |
| 986  | Human | Central      | 0 | 0 | 0 | 0 | 0 | 1 |
| 987  | Human | Central      | 0 | 0 | 0 | 0 | 0 | 0 |
| 988  | Human | Central      | 0 | 0 | 0 | 0 | 0 | 0 |
| 989  | Human | Central      | 0 | 0 | 0 | 1 | 0 | 1 |
| 990  | Human | Central      | 0 | 0 | 0 | 1 | 0 | 1 |
| 991  | Human | Central      | 0 | 0 | 0 | 0 | 0 | 0 |
| 992  | Human | Central      | 0 | 0 | 0 | 0 | 0 | 0 |
| 993  | Human | Central      | 0 | 0 | 0 | 0 | 0 | 0 |
| 994  | Human | Central      | 1 | 0 | 0 | 1 | 0 | 1 |
| 995  | Human | Central      | 1 | 0 | 0 | 1 | 0 | 1 |
| 996  | Human | Central      | 0 | 0 | 0 | 0 | 0 | 1 |
| 997  | Human | Central      | 0 | 0 | 0 | 0 | 0 | 0 |
| 998  | Human | Central      | 0 | 0 | 0 | 0 | 0 | 0 |
| 999  | Human | Central      | 0 | 0 | 0 | 0 | 0 | 0 |
| 1000 | Human | Central      | 0 | 0 | 0 | 0 | 0 | 0 |
| 1001 | Human | Central      | 0 | 0 | 0 | 0 | 0 | 0 |
| 1002 | Human | Central      | 0 | 0 | 0 | 0 | 0 | 0 |
| 1003 | Human | Central      | 0 | 0 | 0 | 1 | 0 | 1 |
| 1004 | Human | Central      | 0 | 0 | 0 | 1 | 0 | 1 |
| 1005 | Human | Central      | 0 | 0 | 0 | 0 | 0 | 0 |
| 1006 | Human | Central      | 0 | 0 | 0 | 1 | 0 | 1 |
| 1007 | Human | Northeastern | 0 | 0 | 0 | 0 | 0 | 0 |

|      |       |              |   |   |   |   |   |   |
|------|-------|--------------|---|---|---|---|---|---|
| 1008 | Human | Central      | 0 | 0 | 0 | 0 | 0 | 0 |
| 1009 | Human | Central      | 0 | 0 | 0 | 0 | 0 | 0 |
| 1010 | Human | Central      | 0 | 0 | 0 | 0 | 0 | 0 |
| 1011 | Human | Northeastern | 0 | 0 | 0 | 0 | 0 | 0 |
| 1012 | Human | Northeastern | 0 | 0 | 0 | 0 | 0 | 0 |
| 1013 | Human | Northeastern | 0 | 0 | 0 | 1 | 0 | 1 |
| 1014 | Human | Central      | 0 | 0 | 0 | 0 | 0 | 0 |
| 1015 | Human | Northern     | 1 | 0 | 0 | 0 | 0 | 1 |
| 1016 | Human | Northern     | 0 | 0 | 0 | 0 | 0 | 0 |
| 1017 | Human | Northern     | 0 | 0 | 0 | 0 | 0 | 0 |
| 1018 | Human | Northern     | 0 | 0 | 0 | 0 | 0 | 0 |
| 1019 | Human | Northern     | 0 | 0 | 0 | 0 | 0 | 0 |
| 1020 | Human | Northern     | 0 | 0 | 0 | 0 | 0 | 0 |
| 1021 | Human | Northern     | 0 | 0 | 0 | 0 | 0 | 0 |
| 1022 | Human | Northern     | 0 | 0 | 0 | 0 | 0 | 0 |
| 1023 | Human | Northern     | 0 | 0 | 0 | 0 | 0 | 0 |
| 1024 | Human | Northern     | 0 | 0 | 0 | 0 | 0 | 0 |
| 1025 | Human | Northern     | 0 | 0 | 0 | 0 | 0 | 0 |
| 1026 | Human | Central      | 0 | 0 | 0 | 0 | 0 | 0 |
| 1027 | Human | Central      | 0 | 0 | 0 | 0 | 0 | 0 |
| 1028 | Human | Southern     | 0 | 0 | 0 | 0 | 0 | 0 |
| 1029 | Human | Southern     | 0 | 0 | 0 | 0 | 0 | 0 |
| 1030 | Human | Southern     | 0 | 0 | 0 | 0 | 0 | 0 |
| 1031 | Human | Northeastern | 0 | 0 | 0 | 0 | 0 | 0 |
| 1032 | Human | Southern     | 0 | 0 | 0 | 0 | 0 | 0 |
| 1033 | Human | Southern     | 0 | 0 | 0 | 0 | 0 | 0 |
| 1034 | Human | Central      | 0 | 0 | 0 | 0 | 0 | 0 |
| 1035 | Human | Southern     | 0 | 0 | 0 | 0 | 0 | 0 |
| 1036 | Human | Southern     | 0 | 0 | 0 | 0 | 0 | 0 |
| 1037 | Human | Southern     | 0 | 0 | 0 | 0 | 0 | 0 |
| 1038 | Human | Southern     | 0 | 0 | 0 | 0 | 0 | 0 |
| 1039 | Human | Southern     | 0 | 0 | 0 | 0 | 0 | 0 |
| 1040 | Human | Southern     | 0 | 0 | 0 | 0 | 0 | 0 |
| 1041 | Human | Southern     | 0 | 0 | 0 | 0 | 0 | 0 |
| 1042 | Human | Southern     | 0 | 0 | 0 | 0 | 0 | 0 |
| 1043 | Human | Southern     | 0 | 0 | 0 | 0 | 0 | 0 |
| 1044 | Human | Southern     | 0 | 0 | 0 | 0 | 0 | 0 |
| 1045 | Human | Southern     | 0 | 0 | 0 | 0 | 0 | 0 |
| 1046 | Human | Southern     | 0 | 0 | 0 | 0 | 0 | 0 |
| 1047 | Human | Southern     | 0 | 0 | 0 | 0 | 0 | 0 |
| 1048 | Human | Southern     | 0 | 0 | 0 | 0 | 0 | 0 |
| 1049 | Human | Southern     | 0 | 0 | 0 | 0 | 0 | 0 |
| 1050 | Human | Southern     | 0 | 0 | 0 | 0 | 0 | 0 |
| 1051 | Human | Southern     | 0 | 0 | 0 | 1 | 0 | 1 |
| 1052 | Human | Southern     | 0 | 0 | 0 | 1 | 0 | 1 |
| 1053 | Human | Southern     | 0 | 0 | 0 | 0 | 0 | 0 |
| 1054 | Human | Southern     | 0 | 0 | 0 | 0 | 0 | 0 |
| 1055 | Human | Southern     | 0 | 0 | 0 | 0 | 0 | 0 |

|      |       |              |   |   |   |   |   |   |
|------|-------|--------------|---|---|---|---|---|---|
| 1056 | Human | Southern     | 0 | 0 | 0 | 0 | 0 | 0 |
| 1057 | Human | Southern     | 0 | 0 | 0 | 1 | 0 | 1 |
| 1058 | Human | Southern     | 0 | 0 | 0 | 0 | 0 | 0 |
| 1059 | Human | Central      | 0 | 0 | 0 | 0 | 0 | 0 |
| 1060 | Human | Central      | 0 | 0 | 0 | 0 | 0 | 0 |
| 1061 | Human | Southern     | 0 | 0 | 0 | 0 | 0 | 0 |
| 1062 | Human | Northeastern | 0 | 0 | 0 | 0 | 0 | 0 |
| 1063 | Human | Northeastern | 0 | 0 | 0 | 0 | 0 | 0 |
| 1064 | Human | Northeastern | 0 | 0 | 0 | 0 | 0 | 0 |
| 1065 | Human | Northeastern | 0 | 0 | 0 | 1 | 0 | 1 |
| 1066 | Human | Northeastern | 0 | 0 | 0 | 0 | 0 | 0 |
| 1067 | Human | Northeastern | 0 | 0 | 0 | 0 | 0 | 0 |
| 1068 | Human | Northeastern | 0 | 0 | 0 | 0 | 0 | 0 |
| 1069 | Human | Central      | 0 | 0 | 0 | 0 | 0 | 0 |
| 1070 | Human | Southern     | 0 | 0 | 0 | 0 | 0 | 0 |
| 1071 | Human | Northeastern | 0 | 0 | 0 | 0 | 0 | 0 |
| 1072 | Human | Northern     | 0 | 0 | 0 | 0 | 0 | 0 |
| 1073 | Human | Northern     | 0 | 0 | 0 | 0 | 0 | 1 |
| 1074 | Human | Northern     | 0 | 0 | 0 | 0 | 0 | 0 |
| 1075 | Human | Northern     | 0 | 0 | 0 | 0 | 0 | 0 |
| 1076 | Human | Northern     | 0 | 0 | 0 | 0 | 0 | 0 |
| 1077 | Human | Northern     | 0 | 0 | 0 | 0 | 0 | 0 |
| 1078 | Human | Northeastern | 0 | 0 | 0 | 0 | 0 | 0 |
| 1079 | Human | Northeastern | 0 | 0 | 0 | 0 | 0 | 1 |
| 1080 | Human | Northeastern | 0 | 0 | 0 | 0 | 0 | 0 |
| 1081 | Human | Northeastern | 0 | 0 | 0 | 0 | 0 | 0 |
| 1082 | Human | Northern     | 0 | 0 | 0 | 0 | 0 | 0 |
| 1083 | Human | Northern     | 0 | 0 | 0 | 0 | 0 | 0 |
| 1084 | Human | Northern     | 0 | 0 | 0 | 0 | 0 | 0 |
| 1085 | Human | Northern     | 0 | 0 | 0 | 0 | 0 | 0 |
| 1086 | Human | Northern     | 0 | 0 | 0 | 0 | 0 | 0 |
| 1087 | Human | Northern     | 0 | 0 | 0 | 0 | 0 | 0 |
| 1088 | Human | Northern     | 0 | 0 | 0 | 0 | 0 | 0 |
| 1089 | Human | Northern     | 0 | 0 | 0 | 0 | 0 | 0 |
| 1090 | Human | Northern     | 0 | 0 | 0 | 0 | 0 | 0 |
| 1091 | Human | Northern     | 0 | 0 | 0 | 0 | 0 | 0 |
| 1092 | Human | Northern     | 0 | 0 | 0 | 0 | 0 | 0 |
| 1093 | Human | Northern     | 0 | 0 | 0 | 0 | 0 | 0 |
| 1094 | Human | Northern     | 0 | 0 | 0 | 0 | 0 | 0 |
| 1095 | Human | Northern     | 0 | 0 | 0 | 0 | 0 | 0 |
| 1096 | Human | Northern     | 0 | 0 | 0 | 0 | 0 | 0 |
| 1097 | Human | Northern     | 0 | 0 | 0 | 0 | 0 | 0 |
| 1098 | Human | Northern     | 0 | 0 | 0 | 0 | 0 | 0 |
| 1099 | Human | Northern     | 0 | 0 | 0 | 0 | 0 | 0 |
| 1100 | Human | Northeastern | 1 | 0 | 0 | 0 | 0 | 1 |
| 1101 | Human | Northeastern | 1 | 0 | 0 | 0 | 0 | 1 |
| 1102 | Human | Northeastern | 0 | 0 | 0 | 0 | 0 | 0 |
| 1103 | Human | Northeastern | 0 | 0 | 0 | 0 | 0 | 0 |

|      |       |              |   |   |   |   |   |   |
|------|-------|--------------|---|---|---|---|---|---|
| 1104 | Human | Northeastern | 0 | 0 | 0 | 0 | 0 | 0 |
| 1105 | Human | Northeastern | 0 | 0 | 0 | 0 | 0 | 0 |
| 1106 | Human | Northeastern | 0 | 0 | 0 | 0 | 0 | 0 |
| 1107 | Human | Northeastern | 0 | 0 | 0 | 0 | 0 | 0 |
| 1108 | Human | Northeastern | 0 | 0 | 0 | 0 | 0 | 0 |
| 1109 | Human | Northeastern | 0 | 0 | 0 | 0 | 0 | 0 |
| 1110 | Human | Northeastern | 0 | 0 | 0 | 0 | 0 | 0 |
| 1111 | Human | Northeastern | 0 | 0 | 0 | 0 | 0 | 0 |
| 1112 | Human | Northeastern | 0 | 0 | 0 | 0 | 0 | 0 |
| 1113 | Human | Northeastern | 0 | 0 | 0 | 0 | 0 | 0 |
| 1114 | Human | Northeastern | 0 | 0 | 0 | 0 | 0 | 0 |
| 1115 | Human | Northeastern | 0 | 0 | 0 | 1 | 0 | 1 |
| 1116 | Human | Northeastern | 0 | 0 | 0 | 0 | 0 | 0 |
| 1117 | Human | Northeastern | 0 | 0 | 0 | 0 | 0 | 0 |
| 1118 | Human | Northern     | 0 | 0 | 0 | 0 | 0 | 0 |
| 1119 | Human | Northern     | 0 | 0 | 0 | 0 | 0 | 0 |
| 1120 | Human | Northern     | 0 | 0 | 0 | 0 | 0 | 0 |
| 1121 | Human | Northern     | 0 | 0 | 0 | 0 | 0 | 0 |
| 1122 | Human | Northern     | 0 | 0 | 0 | 0 | 0 | 0 |
| 1123 | Human | Northern     | 0 | 0 | 0 | 0 | 0 | 0 |
| 1124 | Human | Northern     | 0 | 0 | 0 | 0 | 0 | 0 |
| 1125 | Human | Northern     | 0 | 0 | 0 | 0 | 0 | 0 |
| 1126 | Human | Northern     | 0 | 0 | 0 | 0 | 0 | 0 |
| 1127 | Human | Northern     | 0 | 0 | 0 | 0 | 0 | 0 |
| 1128 | Human | Southern     | 0 | 0 | 0 | 0 | 0 | 0 |
| 1129 | Human | Central      | 0 | 0 | 0 | 0 | 0 | 0 |
| 1130 | Human | Eastern      | 0 | 0 | 0 | 0 | 0 | 0 |
| 1131 | Human | Central      | 0 | 0 | 0 | 0 | 0 | 0 |
| 1132 | Human | Southern     | 0 | 0 | 0 | 0 | 0 | 0 |
| 1133 | Human | Southern     | 0 | 0 | 0 | 0 | 0 | 0 |
| 1134 | Human | Southern     | 0 | 0 | 0 | 0 | 0 | 0 |
| 1135 | Human | Northern     | 0 | 0 | 0 | 0 | 0 | 0 |
| 1136 | Human | Central      | 0 | 0 | 0 | 0 | 0 | 0 |
| 1137 | Human | Central      | 0 | 0 | 0 | 0 | 0 | 0 |
| 1138 | Human | Central      | 0 | 0 | 0 | 0 | 0 | 0 |
| 1139 | Human | Northeastern | 0 | 0 | 0 | 0 | 0 | 0 |
| 1140 | Human | Northeastern | 0 | 0 | 0 | 1 | 0 | 1 |
| 1141 | Human | Northeastern | 0 | 0 | 0 | 0 | 0 | 0 |
| 1142 | Human | Northeastern | 0 | 0 | 0 | 0 | 0 | 0 |
| 1143 | Human | Northeastern | 0 | 0 | 0 | 0 | 0 | 0 |
| 1144 | Human | Northeastern | 0 | 0 | 0 | 0 | 0 | 0 |
| 1145 | Human | Northeastern | 0 | 0 | 0 | 0 | 0 | 0 |
| 1146 | Human | Northeastern | 0 | 0 | 0 | 1 | 0 | 1 |
| 1147 | Human | Northeastern | 0 | 0 | 0 | 0 | 0 | 0 |
| 1148 | Human | Central      | 0 | 0 | 0 | 0 | 0 | 0 |
| 1149 | Human | Central      | 0 | 0 | 0 | 0 | 0 | 0 |
| 1150 | Human | Central      | 0 | 0 | 0 | 0 | 0 | 0 |
| 1151 | Human | Central      | 0 | 0 | 0 | 0 | 0 | 0 |



|      |       |              |   |   |   |   |   |   |
|------|-------|--------------|---|---|---|---|---|---|
| 1152 | Human | Central      | 0 | 0 | 0 | 0 | 0 | 0 |
| 1153 | Human | Eastern      | 0 | 0 | 0 | 0 | 0 | 0 |
| 1154 | Human | Southern     | 0 | 1 | 0 | 1 | 0 | 1 |
| 1155 | Human | Southern     | 0 | 0 | 0 | 0 | 0 | 0 |
| 1156 | Human | Central      | 0 | 0 | 0 | 0 | 0 | 0 |
| 1157 | Human | Southern     | 0 | 0 | 0 | 0 | 0 | 0 |
| 1158 | Human | Southern     | 0 | 0 | 0 | 0 | 0 | 0 |
| 1159 | Human | Central      | 0 | 0 | 0 | 0 | 0 | 0 |
| 1160 | Human | Eastern      | 0 | 0 | 0 | 0 | 0 | 0 |
| 1161 | Human | Southern     | 0 | 0 | 0 | 0 | 0 | 0 |
| 1162 | Human | Northeastern | 0 | 0 | 0 | 0 | 0 | 0 |
| 1163 | Human | Central      | 0 | 0 | 0 | 0 | 0 | 0 |
| 1164 | Human | Northeastern | 0 | 0 | 0 | 0 | 0 | 0 |
| 1165 | Human | Northeastern | 0 | 0 | 0 | 0 | 0 | 0 |
| 1166 | Human | Northeastern | 0 | 0 | 0 | 0 | 0 | 0 |
| 1167 | Human | Northeastern | 0 | 0 | 0 | 0 | 0 | 0 |
| 1168 | Human | Northeastern | 0 | 0 | 0 | 0 | 0 | 0 |
| 1169 | Human | Northeastern | 0 | 0 | 0 | 0 | 0 | 0 |
| 1170 | Human | Northeastern | 0 | 0 | 0 | 0 | 0 | 0 |
| 1171 | Human | Northeastern | 0 | 0 | 0 | 0 | 0 | 0 |
| 1172 | Human | Northeastern | 0 | 0 | 0 | 1 | 0 | 1 |
| 1173 | Human | Northeastern | 0 | 0 | 0 | 0 | 0 | 0 |
| 1174 | Human | Northeastern | 0 | 0 | 0 | 0 | 0 | 0 |
| 1175 | Human | Eastern      | 0 | 0 | 0 | 0 | 0 | 0 |
| 1176 | Human | Eastern      | 0 | 1 | 0 | 1 | 0 | 1 |
| 1177 | Human | Eastern      | 0 | 0 | 0 | 1 | 0 | 1 |
| 1178 | Human | Eastern      | 0 | 0 | 0 | 0 | 0 | 1 |
| 1179 | Human | Eastern      | 0 | 0 | 0 | 0 | 0 | 0 |
| 1180 | Human | Eastern      | 0 | 0 | 0 | 1 | 0 | 1 |
| 1181 | Human | Eastern      | 1 | 0 | 0 | 0 | 0 | 1 |
| 1182 | Human | Eastern      | 1 | 0 | 0 | 0 | 0 | 1 |
| 1183 | Human | Eastern      | 0 | 0 | 0 | 0 | 0 | 1 |
| 1184 | Human | Eastern      | 1 | 0 | 0 | 0 | 0 | 1 |
| 1185 | Human | Eastern      | 0 | 1 | 0 | 1 | 0 | 1 |
| 1186 | Human | Eastern      | 0 | 1 | 0 | 1 | 0 | 1 |
| 1187 | Human | Northern     | 0 | 1 | 0 | 0 | 0 | 1 |
| 1188 | Human | Northern     | 0 | 1 | 0 | 0 | 0 | 1 |
| 1189 | Human | Northern     | 0 | 0 | 0 | 0 | 0 | 0 |
| 1190 | Human | Northern     | 0 | 0 | 0 | 1 | 0 | 1 |
| 1191 | Human | Northern     | 0 | 0 | 0 | 0 | 0 | 0 |
| 1192 | Human | Northern     | 0 | 0 | 0 | 1 | 0 | 1 |
| 1193 | Human | Northern     | 0 | 0 | 0 | 0 | 0 | 0 |
| 1194 | Human | Northern     | 0 | 1 | 0 | 0 | 0 | 1 |
| 1195 | Human | Northern     | 1 | 0 | 0 | 0 | 0 | 1 |
| 1196 | Human | Northern     | 1 | 0 | 0 | 0 | 0 | 1 |
| 1197 | Human | Northern     | 0 | 1 | 0 | 0 | 0 | 1 |
| 1198 | Human | Northern     | 0 | 0 | 0 | 0 | 0 | 1 |
| 1199 | Human | Northern     | 0 | 0 | 0 | 0 | 0 | 0 |

|      |       |              |   |   |   |   |   |   |
|------|-------|--------------|---|---|---|---|---|---|
| 1200 | Human | Northern     | 0 | 0 | 0 | 1 | 0 | 1 |
| 1201 | Human | Northern     | 0 | 0 | 0 | 0 | 0 | 0 |
| 1202 | Human | Northern     | 0 | 0 | 0 | 1 | 0 | 1 |
| 1203 | Human | Northern     | 0 | 0 | 0 | 1 | 0 | 1 |
| 1204 | Human | Northern     | 0 | 0 | 0 | 1 | 0 | 1 |
| 1205 | Human | Northern     | 0 | 0 | 0 | 1 | 0 | 1 |
| 1206 | Human | Northern     | 0 | 0 | 0 | 1 | 0 | 1 |
| 1207 | Human | Northern     | 0 | 0 | 0 | 0 | 0 | 0 |
| 1208 | Human | Northern     | 0 | 0 | 0 | 0 | 0 | 0 |
| 1209 | Human | Northern     | 0 | 0 | 0 | 1 | 0 | 1 |
| 1210 | Human | Northern     | 1 | 0 | 0 | 0 | 0 | 1 |
| 1211 | Human | Northern     | 0 | 0 | 1 | 0 | 0 | 1 |
| 1212 | Human | Northern     | 0 | 0 | 1 | 0 | 0 | 1 |
| 1213 | Human | Northern     | 0 | 0 | 0 | 0 | 0 | 0 |
| 1214 | Human | Northern     | 0 | 0 | 0 | 0 | 0 | 0 |
| 1215 | Human | Southern     | 0 | 0 | 0 | 0 | 0 | 0 |
| 1216 | Human | Southern     | 0 | 0 | 0 | 0 | 0 | 0 |
| 1217 | Human | Southern     | 0 | 0 | 0 | 0 | 0 | 0 |
| 1218 | Human | Southern     | 0 | 0 | 0 | 0 | 0 | 0 |
| 1219 | Human | Southern     | 0 | 0 | 0 | 0 | 0 | 0 |
| 1220 | Human | Southern     | 0 | 0 | 0 | 0 | 0 | 0 |
| 1221 | Human | Southern     | 0 | 0 | 0 | 0 | 0 | 0 |
| 1222 | Human | Southern     | 0 | 0 | 0 | 0 | 0 | 0 |
| 1223 | Human | Southern     | 0 | 0 | 0 | 0 | 0 | 0 |
| 1224 | Human | Southern     | 0 | 0 | 0 | 0 | 0 | 0 |
| 1225 | Human | Southern     | 0 | 0 | 0 | 0 | 0 | 0 |
| 1226 | Human | Southern     | 0 | 0 | 0 | 0 | 0 | 0 |
| 1227 | Human | Southern     | 0 | 0 | 0 | 0 | 0 | 0 |
| 1228 | Human | Southern     | 0 | 0 | 0 | 0 | 0 | 0 |
| 1229 | Human | Southern     | 0 | 0 | 0 | 0 | 0 | 0 |
| 1230 | Human | Southern     | 0 | 0 | 0 | 0 | 0 | 0 |
| 1231 | Human | Southern     | 0 | 0 | 0 | 0 | 0 | 0 |
| 1232 | Human | Southern     | 0 | 0 | 0 | 1 | 0 | 1 |
| 1233 | Human | Southern     | 0 | 0 | 0 | 0 | 0 | 0 |
| 1234 | Human | Southern     | 0 | 0 | 0 | 0 | 0 | 0 |
| 1235 | Human | Southern     | 0 | 0 | 0 | 0 | 0 | 0 |
| 1236 | Human | Southern     | 0 | 0 | 0 | 1 | 0 | 1 |
| 1237 | Human | Northeastern | 0 | 0 | 0 | 0 | 0 | 0 |
| 1238 | Human | Northeastern | 0 | 0 | 0 | 0 | 0 | 0 |
| 1239 | Human | Northeastern | 0 | 0 | 0 | 0 | 0 | 0 |
| 1240 | Human | Northeastern | 0 | 0 | 0 | 0 | 0 | 0 |
| 1241 | Human | Northeastern | 0 | 0 | 0 | 0 | 0 | 0 |
| 1242 | Human | Northeastern | 0 | 0 | 0 | 0 | 0 | 0 |
| 1243 | Human | Northeastern | 0 | 0 | 0 | 0 | 0 | 0 |
| 1244 | Human | Northeastern | 0 | 0 | 0 | 0 | 0 | 0 |
| 1245 | Human | Northeastern | 0 | 0 | 0 | 0 | 0 | 0 |
| 1246 | Human | Northeastern | 0 | 0 | 0 | 0 | 0 | 0 |
| 1247 | Human | Northeastern | 0 | 0 | 0 | 0 | 0 | 0 |

|      |       |              |   |   |   |   |   |   |
|------|-------|--------------|---|---|---|---|---|---|
| 1248 | Human | Northeastern | 1 | 0 | 0 | 0 | 0 | 1 |
| 1249 | Human | Northeastern | 0 | 0 | 0 | 0 | 0 | 0 |
| 1250 | Human | Northeastern | 0 | 0 | 0 | 1 | 0 | 1 |
| 1251 | Human | Northeastern | 0 | 0 | 0 | 0 | 0 | 0 |
| 1252 | Human | Northeastern | 0 | 0 | 0 | 0 | 0 | 0 |
| 1253 | Human | Northeastern | 0 | 0 | 0 | 0 | 0 | 0 |
| 1254 | Human | Northeastern | 0 | 0 | 0 | 0 | 0 | 0 |
| 1255 | Human | Northeastern | 0 | 0 | 0 | 0 | 0 | 0 |
| 1256 | Human | Central      | 0 | 0 | 0 | 0 | 0 | 0 |
| 1257 | Human | Southern     | 0 | 0 | 0 | 0 | 0 | 0 |
| 1258 | Human | Northeastern | 0 | 0 | 0 | 0 | 0 | 0 |
| 1259 | Human | Central      | 0 | 0 | 0 | 0 | 0 | 0 |
| 1260 | Human | Central      | 0 | 0 | 0 | 0 | 0 | 1 |
| 1261 | Human | Central      | 0 | 0 | 0 | 0 | 0 | 0 |
| 1262 | Human | Central      | 0 | 0 | 0 | 0 | 0 | 1 |
| 1263 | Human | Central      | 0 | 0 | 0 | 0 | 0 | 0 |
| 1264 | Human | Central      | 0 | 0 | 0 | 0 | 0 | 0 |
| 1265 | Human | Northern     | 0 | 0 | 0 | 0 | 0 | 0 |
| 1266 | Human | Northeastern | 0 | 0 | 0 | 1 | 0 | 1 |
| 1267 | Human | Northeastern | 0 | 0 | 0 | 0 | 0 | 0 |
| 1268 | Human | Northeastern | 0 | 0 | 0 | 0 | 0 | 0 |
| 1269 | Human | Northeastern | 0 | 0 | 0 | 1 | 0 | 1 |
| 1270 | Human | Northeastern | 0 | 0 | 0 | 0 | 0 | 0 |
| 1271 | Human | Northeastern | 0 | 0 | 0 | 0 | 0 | 0 |
| 1272 | Human | Northeastern | 0 | 0 | 0 | 0 | 0 | 0 |
| 1273 | Human | Central      | 0 | 0 | 0 | 0 | 0 | 0 |
| 1274 | Human | Central      | 0 | 0 | 0 | 0 | 0 | 0 |
| 1275 | Human | Central      | 0 | 0 | 0 | 0 | 0 | 0 |
| 1276 | Human | Central      | 0 | 0 | 0 | 0 | 0 | 0 |
| 1277 | Human | Southern     | 0 | 0 | 0 | 0 | 0 | 0 |
| 1278 | Human | Southern     | 0 | 0 | 0 | 0 | 0 | 0 |
| 1279 | Human | Southern     | 0 | 0 | 0 | 0 | 0 | 0 |
| 1280 | Human | Southern     | 1 | 0 | 0 | 0 | 0 | 1 |
| 1281 | Human | Southern     | 0 | 0 | 0 | 0 | 0 | 0 |
| 1282 | Human | Southern     | 0 | 0 | 0 | 1 | 0 | 1 |
| 1283 | Human | Southern     | 0 | 0 | 0 | 0 | 0 | 0 |
| 1284 | Human | Southern     | 0 | 0 | 0 | 0 | 0 | 0 |
| 1285 | Human | Central      | 0 | 0 | 0 | 0 | 0 | 0 |
| 1286 | Human | Central      | 0 | 0 | 0 | 0 | 0 | 0 |
| 1287 | Human | Central      | 0 | 0 | 0 | 0 | 0 | 0 |
| 1288 | Human | Northeastern | 0 | 0 | 0 | 0 | 0 | 0 |
| 1289 | Human | Northeastern | 0 | 0 | 0 | 0 | 0 | 0 |
| 1290 | Human | Northeastern | 0 | 0 | 0 | 0 | 0 | 0 |
| 1291 | Human | Central      | 0 | 0 | 0 | 0 | 0 | 0 |
| 1292 | Human | Central      | 0 | 0 | 0 | 0 | 0 | 0 |
| 1293 | Human | Central      | 0 | 0 | 0 | 0 | 0 | 0 |
| 1294 | Human | Central      | 0 | 0 | 0 | 0 | 0 | 0 |
| 1295 | Human | Central      | 0 | 0 | 0 | 0 | 0 | 0 |

|      |       |              |   |   |   |   |   |   |
|------|-------|--------------|---|---|---|---|---|---|
| 1296 | Human | Central      | 0 | 0 | 0 | 0 | 0 | 0 |
| 1297 | Human | Central      | 0 | 0 | 0 | 0 | 0 | 0 |
| 1298 | Human | Central      | 0 | 0 | 0 | 0 | 0 | 0 |
| 1299 | Human | Central      | 0 | 0 | 0 | 0 | 0 | 0 |
| 1300 | Human | Central      | 0 | 0 | 0 | 0 | 0 | 0 |
| 1301 | Human | Central      | 0 | 0 | 0 | 0 | 0 | 0 |
| 1302 | Human | Northeastern | 0 | 0 | 0 | 0 | 0 | 0 |
| 1303 | Human | Southern     | 0 | 0 | 0 | 0 | 0 | 0 |
| 1304 | Human | Central      | 0 | 0 | 0 | 0 | 0 | 0 |
| 1305 | Human | Central      | 0 | 0 | 0 | 0 | 0 | 0 |
| 1306 | Human | Central      | 0 | 0 | 0 | 0 | 0 | 0 |
| 1307 | Human | Central      | 0 | 0 | 0 | 0 | 0 | 0 |
| 1308 | Human | Central      | 0 | 0 | 0 | 0 | 0 | 0 |
| 1309 | Human | Central      | 0 | 0 | 0 | 0 | 0 | 0 |
| 1310 | Human | Central      | 0 | 0 | 0 | 0 | 0 | 0 |
| 1311 | Human | Central      | 0 | 0 | 0 | 0 | 0 | 0 |
| 1312 | Human | Central      | 0 | 0 | 0 | 0 | 0 | 0 |
| 1313 | Human | Central      | 0 | 0 | 0 | 0 | 0 | 0 |
| 1314 | Human | Central      | 0 | 0 | 0 | 0 | 0 | 0 |
| 1315 | Human | Central      | 0 | 0 | 0 | 0 | 0 | 0 |
| 1316 | Human | Central      | 0 | 0 | 0 | 0 | 0 | 0 |
| 1317 | Human | Central      | 0 | 0 | 0 | 0 | 0 | 0 |
| 1318 | Human | Central      | 0 | 0 | 0 | 0 | 0 | 0 |
| 1319 | Human | Central      | 0 | 0 | 0 | 0 | 0 | 0 |
| 1320 | Human | Northern     | 0 | 0 | 0 | 0 | 0 | 0 |
| 1321 | Human | Northern     | 0 | 0 | 0 | 0 | 0 | 0 |
| 1322 | Human | Northern     | 0 | 0 | 0 | 0 | 0 | 0 |
| 1323 | Human | Northern     | 1 | 0 | 0 | 0 | 0 | 1 |
| 1324 | Human | Northern     | 0 | 0 | 0 | 0 | 0 | 0 |
| 1325 | Human | Northern     | 0 | 0 | 0 | 1 | 0 | 1 |
| 1326 | Human | Northern     | 0 | 0 | 0 | 0 | 0 | 0 |
| 1327 | Human | Northern     | 0 | 0 | 0 | 1 | 0 | 1 |
| 1328 | Human | Northern     | 0 | 0 | 0 | 0 | 0 | 0 |
| 1329 | Human | Northern     | 0 | 0 | 0 | 0 | 0 | 0 |
| 1330 | Human | Northern     | 0 | 0 | 0 | 0 | 0 | 0 |
| 1331 | Human | Northern     | 0 | 0 | 0 | 0 | 0 | 1 |
| 1332 | Human | Northern     | 0 | 0 | 0 | 0 | 0 | 0 |
| 1333 | Human | Northern     | 0 | 0 | 0 | 0 | 0 | 0 |
| 1334 | Human | Northern     | 0 | 0 | 0 | 0 | 0 | 0 |
| 1335 | Human | Northern     | 0 | 0 | 0 | 1 | 0 | 1 |
| 1336 | Human | Northeastern | 0 | 0 | 0 | 0 | 0 | 0 |
| 1337 | Human | Northeastern | 0 | 0 | 0 | 1 | 0 | 1 |
| 1338 | Human | Northeastern | 0 | 0 | 0 | 0 | 0 | 0 |
| 1339 | Human | Northeastern | 0 | 0 | 0 | 1 | 0 | 1 |
| 1340 | Human | Northeastern | 0 | 0 | 0 | 0 | 0 | 0 |
| 1341 | Human | Eastern      | 0 | 0 | 0 | 0 | 0 | 0 |
| 1342 | Human | Eastern      | 0 | 0 | 0 | 1 | 0 | 1 |
| 1343 | Human | Eastern      | 0 | 0 | 0 | 0 | 0 | 0 |

|      |       |              |   |   |   |   |   |   |
|------|-------|--------------|---|---|---|---|---|---|
| 1344 | Human | Eastern      | 0 | 0 | 0 | 0 | 0 | 0 |
| 1345 | Human | Eastern      | 0 | 0 | 0 | 0 | 0 | 0 |
| 1346 | Human | Eastern      | 0 | 0 | 0 | 0 | 0 | 0 |
| 1347 | Human | Eastern      | 0 | 0 | 0 | 1 | 0 | 1 |
| 1348 | Human | Eastern      | 0 | 0 | 0 | 1 | 0 | 1 |
| 1349 | Human | Central      | 0 | 0 | 0 | 0 | 0 | 0 |
| 1350 | Human | Central      | 0 | 0 | 0 | 0 | 0 | 0 |
| 1351 | Human | Northern     | 0 | 0 | 0 | 0 | 0 | 0 |
| 1352 | Human | Northern     | 0 | 0 | 0 | 0 | 0 | 0 |
| 1353 | Human | Northern     | 0 | 0 | 0 | 0 | 0 | 0 |
| 1354 | Human | Northern     | 1 | 0 | 0 | 0 | 0 | 1 |
| 1355 | Human | Northern     | 0 | 0 | 0 | 0 | 0 | 0 |
| 1356 | Human | Northern     | 0 | 0 | 0 | 0 | 0 | 0 |
| 1357 | Human | Northern     | 0 | 0 | 0 | 1 | 0 | 1 |
| 1358 | Human | Northern     | 1 | 0 | 0 | 1 | 0 | 1 |
| 1359 | Human | Northern     | 0 | 0 | 0 | 0 | 0 | 0 |
| 1360 | Human | Northern     | 0 | 0 | 0 | 1 | 0 | 1 |
| 1361 | Human | Northern     | 0 | 0 | 0 | 0 | 0 | 0 |
| 1362 | Human | Northern     | 0 | 0 | 0 | 0 | 0 | 0 |
| 1363 | Human | Northern     | 0 | 0 | 0 | 1 | 0 | 1 |
| 1364 | Human | Northern     | 0 | 0 | 0 | 1 | 0 | 1 |
| 1365 | Human | Northern     | 0 | 0 | 0 | 0 | 0 | 0 |
| 1366 | Human | Northern     | 0 | 0 | 0 | 0 | 0 | 0 |
| 1367 | Human | Southern     | 0 | 0 | 0 | 0 | 0 | 0 |
| 1368 | Human | Southern     | 0 | 0 | 0 | 0 | 0 | 0 |
| 1369 | Human | Southern     | 0 | 0 | 0 | 0 | 0 | 0 |
| 1370 | Human | Southern     | 0 | 0 | 0 | 1 | 0 | 1 |
| 1371 | Human | Southern     | 0 | 0 | 0 | 0 | 0 | 0 |
| 1372 | Human | Southern     | 0 | 0 | 0 | 1 | 0 | 1 |
| 1373 | Human | Southern     | 0 | 0 | 0 | 0 | 0 | 0 |
| 1374 | Human | Southern     | 0 | 1 | 0 | 1 | 0 | 1 |
| 1375 | Human | Southern     | 0 | 0 | 0 | 0 | 0 | 0 |
| 1376 | Human | Southern     | 0 | 0 | 0 | 0 | 0 | 0 |
| 1377 | Human | Southern     | 0 | 0 | 0 | 0 | 0 | 0 |
| 1378 | Human | Southern     | 0 | 0 | 0 | 0 | 0 | 0 |
| 1379 | Human | Southern     | 0 | 0 | 0 | 0 | 0 | 0 |
| 1380 | Human | Southern     | 0 | 0 | 0 | 0 | 0 | 0 |
| 1381 | Human | Southern     | 0 | 0 | 0 | 0 | 0 | 0 |
| 1382 | Human | Northeastern | 0 | 0 | 0 | 0 | 0 | 0 |
| 1383 | Human | Northeastern | 0 | 0 | 0 | 1 | 0 | 1 |
| 1384 | Human | Northeastern | 0 | 0 | 0 | 1 | 0 | 1 |
| 1385 | Human | Northeastern | 0 | 0 | 0 | 1 | 0 | 1 |
| 1386 | Human | Northeastern | 0 | 0 | 0 | 0 | 0 | 0 |
| 1387 | Human | Northeastern | 0 | 0 | 0 | 0 | 0 | 0 |
| 1388 | Human | Northeastern | 0 | 0 | 0 | 0 | 0 | 0 |
| 1389 | Human | Northeastern | 0 | 0 | 0 | 0 | 0 | 0 |
| 1390 | Human | Northeastern | 0 | 0 | 0 | 0 | 0 | 0 |
| 1391 | Human | Northeastern | 0 | 0 | 0 | 0 | 0 | 0 |

|      |       |              |   |   |   |   |   |   |
|------|-------|--------------|---|---|---|---|---|---|
| 1392 | Human | Northeastern | 0 | 0 | 0 | 0 | 0 | 0 |
| 1393 | Human | Northeastern | 0 | 0 | 0 | 0 | 0 | 1 |
| 1394 | Human | Northeastern | 0 | 0 | 0 | 0 | 0 | 0 |
| 1395 | Human | Northeastern | 0 | 0 | 0 | 0 | 0 | 0 |
| 1396 | Human | Northeastern | 0 | 0 | 0 | 0 | 0 | 0 |
| 1397 | Human | Northeastern | 0 | 0 | 0 | 0 | 0 | 0 |
| 1398 | Human | Northeastern | 0 | 0 | 0 | 0 | 0 | 0 |
| 1399 | Human | Northeastern | 0 | 0 | 0 | 0 | 0 | 0 |
| 1400 | Human | Northeastern | 0 | 0 | 0 | 0 | 0 | 0 |
| 1401 | Human | Northeastern | 0 | 0 | 0 | 0 | 0 | 0 |
| 1402 | Human | Northeastern | 0 | 0 | 0 | 0 | 0 | 0 |
| 1403 | Human | Northeastern | 0 | 0 | 0 | 0 | 0 | 0 |
| 1404 | Human | Northeastern | 0 | 0 | 0 | 0 | 0 | 0 |
| 1405 | Human | Northeastern | 0 | 0 | 0 | 0 | 0 | 0 |
| 1406 | Human | Northeastern | 0 | 0 | 0 | 0 | 0 | 0 |
| 1407 | Human | Northeastern | 0 | 0 | 0 | 0 | 0 | 0 |
| 1408 | Human | Northeastern | 0 | 0 | 0 | 1 | 0 | 1 |
| 1409 | Human | Northeastern | 0 | 0 | 0 | 0 | 0 | 1 |
| 1410 | Human | Northeastern | 0 | 0 | 0 | 0 | 0 | 0 |
| 1411 | Human | Northeastern | 0 | 0 | 0 | 1 | 0 | 1 |
| 1412 | Human | Northeastern | 0 | 0 | 0 | 0 | 0 | 0 |
| 1413 | Human | Eastern      | 0 | 0 | 0 | 0 | 0 | 0 |
| 1414 | Human | Northeastern | 0 | 0 | 0 | 0 | 0 | 0 |
| 1415 | Human | Northeastern | 0 | 0 | 0 | 0 | 0 | 0 |
| 1416 | Human | Northeastern | 0 | 0 | 0 | 0 | 0 | 0 |
| 1417 | Human | Northeastern | 0 | 0 | 0 | 1 | 0 | 1 |
| 1418 | Human | Northeastern | 0 | 0 | 0 | 1 | 0 | 1 |
| 1419 | Human | Northeastern | 0 | 0 | 0 | 0 | 0 | 0 |
| 1420 | Human | Northeastern | 0 | 0 | 0 | 1 | 0 | 1 |
| 1421 | Human | Northeastern | 0 | 0 | 0 | 1 | 0 | 1 |
| 1422 | Human | Central      | 0 | 0 | 0 | 0 | 0 | 0 |
| 1423 | Human | Southern     | 0 | 0 | 0 | 0 | 0 | 0 |
| 1424 | Human | Central      | 0 | 0 | 0 | 0 | 0 | 0 |
| 1425 | Human | Central      | 0 | 0 | 0 | 0 | 0 | 0 |
| 1426 | Human | Central      | 0 | 0 | 0 | 0 | 0 | 0 |
| 1427 | Human | Central      | 0 | 0 | 0 | 0 | 0 | 0 |
| 1428 | Human | Central      | 0 | 0 | 0 | 0 | 0 | 0 |
| 1429 | Human | Central      | 0 | 0 | 0 | 0 | 0 | 0 |
| 1430 | Human | Central      | 0 | 0 | 0 | 0 | 0 | 0 |
| 1431 | Human | Central      | 0 | 0 | 0 | 0 | 0 | 0 |
| 1432 | Human | Central      | 0 | 0 | 0 | 0 | 0 | 0 |
| 1433 | Human | Central      | 0 | 0 | 0 | 0 | 0 | 0 |
| 1434 | Human | Central      | 0 | 0 | 0 | 0 | 0 | 0 |
| 1435 | Human | Central      | 0 | 0 | 0 | 0 | 0 | 0 |
| 1436 | Human | Central      | 0 | 0 | 0 | 0 | 0 | 0 |
| 1437 | Human | Central      | 0 | 0 | 0 | 0 | 0 | 0 |
| 1438 | Human | Central      | 0 | 0 | 0 | 0 | 0 | 0 |
| 1439 | Human | Central      | 0 | 0 | 0 | 0 | 0 | 0 |

|      |       |              |   |   |   |   |   |   |
|------|-------|--------------|---|---|---|---|---|---|
| 1440 | Human | Central      | 0 | 0 | 0 | 0 | 0 | 0 |
| 1441 | Human | Central      | 0 | 0 | 0 | 0 | 0 | 0 |
| 1442 | Human | Central      | 0 | 0 | 0 | 0 | 0 | 0 |
| 1443 | Human | Central      | 0 | 0 | 0 | 0 | 0 | 0 |
| 1444 | Human | Central      | 0 | 0 | 0 | 0 | 0 | 0 |
| 1445 | Human | Central      | 0 | 0 | 0 | 1 | 0 | 1 |
| 1446 | Human | Northeastern | 0 | 0 | 0 | 0 | 0 | 0 |
| 1447 | Human | Northeastern | 0 | 0 | 0 | 0 | 0 | 0 |
| 1448 | Human | Northeastern | 0 | 0 | 0 | 0 | 0 | 0 |
| 1449 | Human | Central      | 0 | 0 | 0 | 0 | 0 | 0 |
| 1450 | Human | Central      | 0 | 0 | 0 | 0 | 0 | 0 |
| 1451 | Human | Northern     | 0 | 0 | 0 | 0 | 0 | 0 |
| 1452 | Human | Central      | 0 | 0 | 0 | 0 | 0 | 0 |
| 1453 | Human | Central      | 0 | 0 | 0 | 0 | 0 | 0 |
| 1454 | Human | Eastern      | 0 | 0 | 0 | 0 | 0 | 0 |
| 1455 | Human | Southern     | 0 | 0 | 0 | 0 | 0 | 0 |
| 1456 | Human | Southern     | 0 | 0 | 0 | 0 | 0 | 0 |
| 1457 | Human | Central      | 0 | 0 | 0 | 0 | 0 | 0 |
| 1458 | Human | Central      | 0 | 0 | 0 | 0 | 0 | 0 |
| 1459 | Human | Northeastern | 0 | 1 | 0 | 1 | 0 | 1 |
| 1460 | Human | Northeastern | 0 | 0 | 0 | 0 | 0 | 0 |
| 1461 | Human | Northeastern | 0 | 0 | 0 | 0 | 0 | 0 |
| 1462 | Human | Northeastern | 1 | 0 | 0 | 0 | 0 | 1 |
| 1463 | Human | Northeastern | 0 | 0 | 0 | 0 | 0 | 0 |
| 1464 | Human | Central      | 0 | 0 | 0 | 0 | 0 | 0 |
| 1465 | Human | Northeastern | 0 | 0 | 0 | 1 | 0 | 1 |
| 1466 | Human | Northeastern | 0 | 0 | 0 | 0 | 0 | 0 |
| 1467 | Human | Northeastern | 1 | 0 | 0 | 0 | 0 | 1 |
| 1468 | Human | Northeastern | 1 | 0 | 0 | 1 | 0 | 1 |
| 1469 | Human | Northeastern | 1 | 0 | 0 | 1 | 0 | 1 |
| 1470 | Human | Northeastern | 1 | 0 | 0 | 0 | 0 | 1 |
| 1471 | Human | Northeastern | 0 | 0 | 0 | 0 | 0 | 1 |
| 1472 | Human | Northeastern | 0 | 0 | 0 | 1 | 0 | 1 |
| 1473 | Human | Northeastern | 0 | 0 | 0 | 0 | 0 | 1 |
| 1474 | Human | Northeastern | 1 | 0 | 0 | 1 | 0 | 1 |
| 1475 | Human | Northeastern | 0 | 0 | 0 | 1 | 0 | 1 |
| 1476 | Human | Northeastern | 0 | 0 | 0 | 0 | 0 | 0 |
| 1477 | Human | Northeastern | 0 | 0 | 0 | 1 | 0 | 1 |
| 1478 | Human | Northeastern | 0 | 0 | 0 | 0 | 0 | 0 |
| 1479 | Human | Northeastern | 0 | 0 | 0 | 0 | 0 | 0 |
| 1480 | Human | Northeastern | 0 | 0 | 0 | 1 | 0 | 1 |
| 1481 | Human | Northeastern | 0 | 0 | 0 | 0 | 0 | 0 |
| 1482 | Human | Northeastern | 0 | 0 | 0 | 1 | 0 | 1 |
| 1483 | Human | Northeastern | 0 | 0 | 0 | 1 | 0 | 1 |
| 1484 | Human | Northeastern | 1 | 0 | 0 | 1 | 0 | 1 |
| 1485 | Human | Northeastern | 1 | 0 | 0 | 1 | 0 | 1 |
| 1486 | Human | Northeastern | 0 | 0 | 0 | 1 | 0 | 1 |
| 1487 | Human | Northeastern | 1 | 0 | 0 | 0 | 0 | 1 |

|      |       |              |   |   |   |   |   |   |
|------|-------|--------------|---|---|---|---|---|---|
| 1488 | Human | Northeastern | 0 | 0 | 0 | 0 | 0 | 0 |
| 1489 | Human | Northeastern | 0 | 0 | 0 | 1 | 0 | 1 |
| 1490 | Human | Northeastern | 0 | 0 | 0 | 1 | 0 | 1 |
| 1491 | Human | Northeastern | 0 | 0 | 0 | 1 | 0 | 1 |
| 1492 | Human | Northeastern | 0 | 0 | 0 | 1 | 0 | 1 |
| 1493 | Human | Northeastern | 0 | 0 | 0 | 1 | 0 | 1 |
| 1494 | Human | Northeastern | 0 | 0 | 0 | 1 | 0 | 1 |
| 1495 | Human | Northeastern | 0 | 0 | 0 | 1 | 0 | 1 |
| 1496 | Human | Northeastern | 0 | 0 | 0 | 0 | 0 | 1 |
| 1497 | Human | Northeastern | 0 | 0 | 0 | 1 | 0 | 1 |
| 1498 | Human | Northeastern | 0 | 0 | 0 | 1 | 0 | 1 |
| 1499 | Human | Northeastern | 0 | 0 | 0 | 1 | 0 | 1 |
| 1500 | Human | Northeastern | 0 | 0 | 0 | 1 | 0 | 1 |
| 1501 | Human | Northeastern | 0 | 0 | 0 | 1 | 0 | 1 |
| 1502 | Human | Northeastern | 0 | 0 | 0 | 1 | 0 | 1 |
| 1503 | Human | Northeastern | 1 | 0 | 0 | 1 | 0 | 1 |
| 1504 | Human | Northeastern | 0 | 0 | 0 | 1 | 0 | 1 |
| 1505 | Human | Northeastern | 0 | 0 | 0 | 1 | 0 | 1 |
| 1506 | Human | Northeastern | 0 | 0 | 0 | 1 | 0 | 1 |
| 1507 | Human | Northeastern | 0 | 0 | 0 | 1 | 0 | 1 |
| 1508 | Human | Northeastern | 1 | 0 | 0 | 1 | 0 | 1 |
| 1509 | Human | Northeastern | 0 | 0 | 0 | 1 | 0 | 1 |
| 1510 | Human | Northeastern | 1 | 0 | 0 | 1 | 0 | 1 |
| 1511 | Human | Northeastern | 0 | 0 | 0 | 0 | 0 | 1 |
| 1512 | Human | Northeastern | 0 | 0 | 0 | 0 | 0 | 0 |
| 1513 | Human | Northeastern | 0 | 0 | 0 | 0 | 0 | 0 |
| 1514 | Human | Northeastern | 0 | 0 | 0 | 1 | 0 | 1 |
| 1515 | Human | Northeastern | 0 | 0 | 0 | 0 | 0 | 0 |
| 1516 | Human | Northeastern | 0 | 0 | 0 | 1 | 0 | 1 |
| 1517 | Human | Northeastern | 0 | 0 | 0 | 1 | 0 | 1 |
| 1518 | Human | Northeastern | 1 | 0 | 0 | 1 | 0 | 1 |
| 1519 | Human | Northeastern | 0 | 0 | 0 | 0 | 0 | 0 |
| 1520 | Human | Northeastern | 0 | 0 | 0 | 1 | 0 | 1 |
| 1521 | Human | Northeastern | 0 | 0 | 0 | 1 | 0 | 1 |
| 1522 | Human | Northeastern | 0 | 0 | 0 | 1 | 0 | 1 |
| 1523 | Human | Northeastern | 0 | 0 | 0 | 0 | 0 | 0 |
| 1524 | Human | Northeastern | 0 | 0 | 0 | 1 | 0 | 1 |
| 1525 | Human | Northeastern | 0 | 1 | 0 | 1 | 0 | 1 |
| 1526 | Human | Northeastern | 0 | 0 | 0 | 0 | 0 | 0 |
| 1527 | Human | Northeastern | 0 | 1 | 0 | 0 | 0 | 1 |
| 1528 | Human | Northeastern | 0 | 0 | 0 | 1 | 0 | 1 |
| 1529 | Human | Northeastern | 0 | 0 | 0 | 0 | 0 | 0 |
| 1530 | Human | Central      | 0 | 0 | 0 | 0 | 0 | 0 |
| 1531 | Human | Eastern      | 0 | 0 | 0 | 0 | 0 | 0 |
| 1532 | Human | Central      | 0 | 0 | 0 | 0 | 0 | 0 |
| 1533 | Human | Central      | 0 | 0 | 0 | 0 | 0 | 0 |
| 1534 | Human | Central      | 0 | 0 | 0 | 0 | 0 | 0 |
| 1535 | Human | Central      | 0 | 0 | 0 | 0 | 0 | 0 |



|      |       |              |   |   |   |   |   |   |
|------|-------|--------------|---|---|---|---|---|---|
| 1536 | Human | Central      | 0 | 0 | 0 | 0 | 0 | 0 |
| 1537 | Human | Central      | 0 | 0 | 0 | 0 | 0 | 0 |
| 1538 | Human | Central      | 0 | 0 | 0 | 0 | 0 | 0 |
| 1539 | Human | Northern     | 0 | 0 | 0 | 0 | 0 | 0 |
| 1540 | Human | Southern     | 0 | 0 | 0 | 0 | 0 | 0 |
| 1541 | Human | Southern     | 0 | 0 | 0 | 0 | 0 | 0 |
| 1542 | Human | Southern     | 0 | 0 | 0 | 0 | 0 | 0 |
| 1543 | Human | Central      | 0 | 0 | 0 | 0 | 0 | 0 |
| 1544 | Human | Central      | 0 | 0 | 0 | 0 | 0 | 0 |
| 1545 | Human | Central      | 0 | 0 | 0 | 0 | 0 | 0 |
| 1546 | Human | Central      | 0 | 0 | 0 | 0 | 0 | 0 |
| 1547 | Human | Central      | 0 | 0 | 0 | 0 | 0 | 0 |
| 1548 | Human | Central      | 0 | 0 | 0 | 0 | 0 | 0 |
| 1549 | Human | Northeastern | 0 | 0 | 0 | 0 | 0 | 0 |
| 1550 | Human | Central      | 0 | 0 | 0 | 0 | 0 | 0 |
| 1551 | Human | Central      | 0 | 0 | 0 | 0 | 0 | 0 |
| 1552 | Human | Central      | 0 | 0 | 0 | 0 | 0 | 0 |
| 1553 | Human | Central      | 0 | 0 | 0 | 0 | 0 | 0 |
| 1554 | Human | Central      | 0 | 0 | 0 | 0 | 0 | 0 |
| 1555 | Human | Eastern      | 0 | 0 | 0 | 0 | 0 | 0 |
| 1556 | Human | Central      | 0 | 0 | 0 | 0 | 0 | 0 |
| 1557 | Human | Central      | 0 | 0 | 0 | 0 | 0 | 0 |
| 1558 | Human | Northeastern | 0 | 0 | 0 | 0 | 0 | 0 |
| 1559 | Human | Northeastern | 0 | 0 | 0 | 0 | 0 | 0 |
| 1560 | Human | Northeastern | 0 | 0 | 0 | 0 | 0 | 0 |
| 1561 | Human | Northeastern | 0 | 0 | 0 | 0 | 0 | 0 |
| 1562 | Human | Northeastern | 0 | 0 | 0 | 0 | 0 | 0 |
| 1563 | Human | Northeastern | 0 | 0 | 0 | 0 | 0 | 0 |
| 1564 | Human | Eastern      | 0 | 0 | 0 | 0 | 0 | 0 |
| 1565 | Human | Central      | 0 | 0 | 0 | 0 | 0 | 0 |
| 1566 | Human | Central      | 0 | 0 | 0 | 0 | 0 | 0 |
| 1567 | Human | Eastern      | 0 | 0 | 0 | 0 | 0 | 0 |
| 1568 | Human | Central      | 0 | 0 | 0 | 0 | 0 | 0 |
| 1569 | Human | Central      | 0 | 0 | 0 | 0 | 0 | 0 |
| 1570 | Human | Central      | 0 | 0 | 0 | 0 | 0 | 0 |
| 1571 | Human | Central      | 0 | 0 | 0 | 0 | 0 | 0 |
| 1572 | Human | Central      | 0 | 0 | 0 | 0 | 0 | 0 |
| 1573 | Human | Central      | 0 | 0 | 0 | 0 | 0 | 0 |
| 1574 | Human | Central      | 0 | 0 | 0 | 0 | 0 | 0 |
| 1575 | Human | Central      | 0 | 0 | 0 | 0 | 0 | 0 |
| 1576 | Human | Central      | 0 | 0 | 0 | 0 | 0 | 0 |
| 1577 | Human | Central      | 0 | 0 | 0 | 0 | 0 | 0 |
| 1578 | Human | Central      | 0 | 0 | 0 | 0 | 0 | 0 |
| 1579 | Human | Central      | 0 | 0 | 0 | 0 | 0 | 0 |
| 1580 | Human | Central      | 0 | 0 | 0 | 0 | 0 | 0 |
| 1581 | Human | Central      | 0 | 0 | 0 | 0 | 0 | 0 |
| 1582 | Human | Northeastern | 0 | 0 | 0 | 0 | 0 | 0 |
| 1583 | Human | Northeastern | 0 | 0 | 0 | 0 | 0 | 0 |

|      |       |              |   |   |   |   |   |   |
|------|-------|--------------|---|---|---|---|---|---|
| 1584 | Human | Central      | 0 | 0 | 0 | 0 | 0 | 0 |
| 1585 | Human | Central      | 0 | 0 | 0 | 0 | 0 | 0 |
| 1586 | Human | Southern     | 0 | 0 | 0 | 0 | 0 | 0 |
| 1587 | Human | Central      | 0 | 0 | 0 | 0 | 0 | 0 |
| 1588 | Human | Central      | 0 | 0 | 0 | 0 | 0 | 0 |
| 1589 | Human | Central      | 0 | 0 | 0 | 0 | 0 | 0 |
| 1590 | Human | Central      | 0 | 0 | 0 | 0 | 0 | 0 |
| 1591 | Human | Northeastern | 0 | 0 | 0 | 0 | 0 | 0 |
| 1592 | Human | Northeastern | 0 | 0 | 0 | 0 | 0 | 1 |
| 1593 | Human | Northeastern | 0 | 0 | 0 | 0 | 0 | 0 |
| 1594 | Human | Northeastern | 0 | 0 | 0 | 0 | 0 | 0 |
| 1595 | Human | Northeastern | 0 | 0 | 0 | 0 | 0 | 1 |
| 1596 | Human | Central      | 0 | 0 | 0 | 0 | 0 | 0 |
| 1597 | Human | Central      | 0 | 0 | 0 | 0 | 0 | 0 |
| 1598 | Human | Central      | 0 | 0 | 0 | 0 | 0 | 0 |
| 1599 | Human | Central      | 0 | 0 | 0 | 0 | 0 | 0 |
| 1600 | Human | Eastern      | 0 | 0 | 0 | 0 | 0 | 0 |
| 1601 | Human | Central      | 0 | 0 | 0 | 0 | 0 | 0 |
| 1602 | Human | Northern     | 0 | 0 | 0 | 0 | 0 | 0 |
| 1603 | Human | Central      | 0 | 0 | 0 | 0 | 0 | 0 |
| 1604 | Human | Northeastern | 0 | 0 | 0 | 0 | 0 | 0 |
| 1605 | Human | Northeastern | 0 | 0 | 0 | 0 | 0 | 0 |
| 1606 | Human | Northeastern | 0 | 0 | 0 | 0 | 0 | 0 |
| 1607 | Human | Northeastern | 0 | 0 | 0 | 0 | 0 | 0 |
| 1608 | Human | Northeastern | 0 | 0 | 0 | 0 | 0 | 0 |
| 1609 | Human | Northern     | 0 | 0 | 0 | 0 | 0 | 0 |
| 1610 | Human | Northern     | 0 | 0 | 0 | 0 | 0 | 0 |
| 1611 | Human | Central      | 0 | 0 | 0 | 0 | 0 | 0 |
| 1612 | Human | Central      | 0 | 0 | 0 | 0 | 0 | 0 |
| 1613 | Human | Central      | 0 | 0 | 0 | 0 | 0 | 0 |
| 1614 | Human | Central      | 0 | 0 | 0 | 0 | 0 | 0 |
| 1615 | Human | Northeastern | 0 | 0 | 0 | 0 | 0 | 0 |
| 1616 | Human | Central      | 0 | 0 | 0 | 0 | 0 | 0 |
| 1617 | Human | Central      | 0 | 0 | 0 | 0 | 0 | 0 |
| 1618 | Human | Northeastern | 0 | 0 | 0 | 0 | 0 | 0 |
| 1619 | Human | Eastern      | 0 | 0 | 0 | 0 | 0 | 0 |
| 1620 | Human | Central      | 0 | 0 | 0 | 0 | 0 | 0 |
| 1621 | Human | Central      | 0 | 0 | 0 | 0 | 0 | 0 |
| 1622 | Human | Central      | 0 | 0 | 0 | 0 | 0 | 0 |
| 1623 | Human | Eastern      | 0 | 0 | 0 | 0 | 0 | 0 |
| 1624 | Human | Eastern      | 0 | 0 | 0 | 0 | 0 | 0 |
| 1625 | Human | Central      | 0 | 0 | 0 | 0 | 0 | 0 |
| 1626 | Human | Eastern      | 0 | 0 | 0 | 0 | 0 | 0 |
| 1627 | Human | Central      | 0 | 0 | 0 | 0 | 0 | 0 |
| 1628 | Human | Central      | 0 | 0 | 0 | 0 | 0 | 0 |
| 1629 | Human | Central      | 0 | 0 | 0 | 0 | 0 | 0 |
| 1630 | Human | Central      | 0 | 0 | 0 | 0 | 0 | 0 |
| 1631 | Human | Southern     | 0 | 0 | 0 | 0 | 0 | 0 |

|      |       |              |   |   |   |   |   |   |
|------|-------|--------------|---|---|---|---|---|---|
| 1632 | Human | Southern     | 0 | 0 | 0 | 0 | 0 | 0 |
| 1633 | Human | Central      | 0 | 0 | 0 | 0 | 0 | 0 |
| 1634 | Human | Central      | 0 | 0 | 0 | 0 | 0 | 0 |
| 1635 | Human | Central      | 0 | 0 | 0 | 0 | 0 | 0 |
| 1636 | Human | Central      | 0 | 0 | 0 | 0 | 0 | 0 |
| 1637 | Human | Central      | 0 | 0 | 0 | 0 | 0 | 0 |
| 1638 | Human | Central      | 0 | 0 | 0 | 0 | 0 | 0 |
| 1639 | Human | Central      | 0 | 0 | 0 | 0 | 0 | 0 |
| 1640 | Human | Central      | 0 | 0 | 0 | 0 | 0 | 0 |
| 1641 | Human | Eastern      | 0 | 0 | 0 | 0 | 0 | 0 |
| 1642 | Human | Central      | 0 | 0 | 0 | 0 | 0 | 0 |
| 1643 | Human | Eastern      | 0 | 0 | 0 | 0 | 0 | 0 |
| 1644 | Human | Central      | 0 | 0 | 0 | 0 | 0 | 0 |
| 1645 | Human | Southern     | 0 | 0 | 0 | 1 | 0 | 1 |
| 1646 | Human | Central      | 0 | 0 | 0 | 0 | 0 | 0 |
| 1647 | Human | Central      | 0 | 0 | 0 | 0 | 0 | 0 |
| 1648 | Human | Central      | 0 | 0 | 0 | 0 | 0 | 0 |
| 1649 | Human | Eastern      | 0 | 0 | 0 | 0 | 0 | 0 |
| 1650 | Human | Central      | 0 | 0 | 0 | 0 | 0 | 0 |
| 1651 | Human | Central      | 0 | 0 | 0 | 0 | 0 | 0 |
| 1652 | Human | Central      | 0 | 0 | 0 | 0 | 0 | 0 |
| 1653 | Human | Eastern      | 0 | 0 | 0 | 0 | 0 | 0 |
| 1654 | Human | Central      | 0 | 0 | 0 | 0 | 0 | 0 |
| 1655 | Human | Eastern      | 0 | 0 | 0 | 0 | 0 | 0 |
| 1656 | Human | Southern     | 0 | 0 | 0 | 0 | 0 | 0 |
| 1657 | Human | Southern     | 0 | 0 | 0 | 0 | 0 | 0 |
| 1658 | Human | Southern     | 0 | 0 | 0 | 0 | 0 | 0 |
| 1659 | Human | Central      | 0 | 0 | 0 | 0 | 0 | 0 |
| 1660 | Human | Central      | 0 | 0 | 0 | 0 | 0 | 0 |
| 1661 | Human | Central      | 0 | 0 | 0 | 0 | 0 | 0 |
| 1662 | Human | Northeastern | 0 | 0 | 0 | 0 | 0 | 0 |
| 1663 | Human | Northeastern | 0 | 0 | 0 | 1 | 0 | 1 |
| 1664 | Human | Northeastern | 0 | 0 | 0 | 1 | 0 | 1 |
| 1665 | Human | Northeastern | 1 | 0 | 0 | 0 | 0 | 1 |
| 1666 | Human | Northeastern | 0 | 0 | 0 | 0 | 0 | 0 |
| 1667 | Human | Northeastern | 0 | 0 | 0 | 1 | 0 | 1 |
| 1668 | Human | Central      | 0 | 0 | 0 | 0 | 0 | 0 |
| 1669 | Human | Central      | 0 | 0 | 0 | 0 | 0 | 0 |
| 1670 | Human | Central      | 0 | 0 | 0 | 0 | 0 | 0 |
| 1671 | Human | Central      | 0 | 0 | 0 | 0 | 0 | 0 |
| 1672 | Human | Central      | 0 | 0 | 0 | 0 | 0 | 0 |
| 1673 | Human | Central      | 0 | 0 | 0 | 0 | 0 | 0 |
| 1674 | Human | Central      | 0 | 0 | 0 | 0 | 0 | 0 |
| 1675 | Human | Eastern      | 0 | 0 | 0 | 0 | 0 | 0 |
| 1676 | Human | Central      | 0 | 0 | 0 | 0 | 0 | 0 |
| 1677 | Human | Central      | 0 | 0 | 0 | 0 | 0 | 0 |
| 1678 | Human | Northeastern | 0 | 0 | 0 | 0 | 0 | 0 |
| 1679 | Human | Central      | 0 | 0 | 0 | 0 | 0 | 0 |

|      |       |              |   |   |   |   |   |   |
|------|-------|--------------|---|---|---|---|---|---|
| 1680 | Human | Northeastern | 0 | 0 | 0 | 0 | 0 | 0 |
| 1681 | Human | Central      | 0 | 0 | 0 | 0 | 0 | 0 |
| 1682 | Human | Central      | 0 | 0 | 0 | 0 | 0 | 0 |
| 1683 | Human | Central      | 0 | 0 | 0 | 0 | 0 | 0 |
| 1684 | Human | Central      | 0 | 0 | 0 | 0 | 0 | 0 |
| 1685 | Human | Central      | 0 | 0 | 0 | 0 | 0 | 0 |
| 1686 | Human | Northeastern | 0 | 0 | 0 | 0 | 0 | 0 |
| 1687 | Human | Central      | 0 | 0 | 0 | 1 | 0 | 1 |
| 1688 | Human | Central      | 0 | 0 | 0 | 0 | 0 | 0 |
| 1689 | Human | Central      | 0 | 0 | 0 | 0 | 0 | 0 |
| 1690 | Human | Northeastern | 0 | 0 | 0 | 0 | 0 | 0 |
| 1691 | Human | Central      | 0 | 0 | 0 | 0 | 0 | 0 |
| 1692 | Human | Central      | 0 | 0 | 0 | 0 | 0 | 0 |
| 1693 | Human | Central      | 0 | 0 | 0 | 0 | 0 | 0 |
| 1694 | Human | Northeastern | 0 | 0 | 0 | 0 | 0 | 0 |
| 1695 | Human | Central      | 0 | 0 | 0 | 0 | 0 | 0 |
| 1696 | Human | Central      | 0 | 0 | 0 | 0 | 0 | 0 |
| 1697 | Human | Central      | 0 | 0 | 0 | 0 | 0 | 0 |
| 1698 | Human | Central      | 0 | 0 | 0 | 0 | 0 | 0 |
| 1699 | Human | Central      | 0 | 0 | 0 | 0 | 0 | 0 |
| 1700 | Human | Central      | 0 | 0 | 0 | 0 | 0 | 0 |
| 1701 | Human | Central      | 0 | 0 | 0 | 0 | 0 | 0 |
| 1702 | Human | Central      | 0 | 0 | 0 | 0 | 0 | 0 |
| 1703 | Human | Central      | 0 | 0 | 0 | 0 | 0 | 0 |
| 1704 | Human | Central      | 0 | 0 | 0 | 0 | 0 | 0 |
| 1705 | Human | Northeastern | 0 | 0 | 0 | 0 | 0 | 0 |
| 1706 | Human | Central      | 0 | 0 | 0 | 0 | 0 | 0 |
| 1707 | Human | Central      | 0 | 0 | 0 | 0 | 0 | 0 |
| 1708 | Human | Central      | 0 | 0 | 0 | 0 | 0 | 0 |
| 1709 | Human | Central      | 0 | 0 | 0 | 0 | 0 | 0 |
| 1710 | Human | Central      | 0 | 0 | 0 | 0 | 0 | 0 |
| 1711 | Human | Central      | 0 | 0 | 0 | 0 | 0 | 0 |
| 1712 | Human | Central      | 0 | 0 | 0 | 0 | 0 | 0 |
| 1713 | Human | Central      | 0 | 0 | 0 | 0 | 0 | 0 |
| 1714 | Human | Eastern      | 0 | 0 | 0 | 0 | 0 | 0 |
| 1715 | Human | Central      | 0 | 0 | 0 | 0 | 0 | 0 |
| 1716 | Human | Central      | 0 | 0 | 0 | 0 | 0 | 0 |
| 1717 | Human | Eastern      | 0 | 0 | 0 | 0 | 0 | 0 |
| 1718 | Human | Eastern      | 0 | 0 | 0 | 0 | 0 | 0 |
| 1719 | Human | Central      | 0 | 0 | 0 | 0 | 0 | 0 |
| 1720 | Human | Central      | 0 | 0 | 0 | 0 | 0 | 0 |
| 1721 | Human | Northeastern | 0 | 0 | 0 | 0 | 0 | 0 |
| 1722 | Human | Central      | 0 | 0 | 0 | 0 | 0 | 0 |
| 1723 | Human | Eastern      | 0 | 0 | 0 | 0 | 0 | 0 |
| 1724 | Human | Central      | 0 | 0 | 0 | 0 | 0 | 0 |
| 1725 | Human | Central      | 0 | 0 | 0 | 0 | 0 | 0 |
| 1726 | Human | Central      | 0 | 0 | 0 | 0 | 0 | 0 |
| 1727 | Human | Central      | 0 | 0 | 0 | 0 | 0 | 0 |

|      |       |              |   |   |   |   |   |   |
|------|-------|--------------|---|---|---|---|---|---|
| 1728 | Human | Central      | 0 | 0 | 0 | 0 | 0 | 0 |
| 1729 | Human | Northeastern | 0 | 0 | 0 | 0 | 0 | 0 |
| 1730 | Human | Northeastern | 0 | 0 | 0 | 0 | 0 | 0 |
| 1731 | Human | Northeastern | 0 | 0 | 0 | 0 | 0 | 0 |
| 1732 | Human | Northeastern | 0 | 0 | 0 | 0 | 0 | 0 |
| 1733 | Human | Central      | 0 | 0 | 0 | 0 | 0 | 0 |
| 1734 | Human | Northeastern | 0 | 0 | 0 | 0 | 0 | 0 |
| 1735 | Human | Central      | 0 | 0 | 0 | 0 | 0 | 0 |
| 1736 | Human | Southern     | 0 | 0 | 0 | 0 | 0 | 0 |
| 1737 | Human | Central      | 0 | 0 | 0 | 0 | 0 | 0 |
| 1738 | Human | Central      | 0 | 0 | 0 | 0 | 0 | 0 |
| 1739 | Human | Central      | 0 | 0 | 0 | 0 | 0 | 0 |
| 1740 | Human | Central      | 0 | 0 | 0 | 0 | 0 | 0 |
| 1741 | Human | Central      | 0 | 0 | 0 | 0 | 0 | 0 |
| 1742 | Human | Central      | 0 | 0 | 0 | 0 | 0 | 0 |
| 1743 | Human | Central      | 0 | 0 | 0 | 0 | 0 | 0 |
| 1744 | Human | Central      | 0 | 0 | 0 | 0 | 0 | 0 |
| 1745 | Human | Eastern      | 0 | 0 | 0 | 0 | 0 | 0 |
| 1746 | Human | Central      | 0 | 0 | 0 | 0 | 0 | 0 |
| 1747 | Human | Central      | 0 | 0 | 0 | 0 | 0 | 0 |
| 1748 | Human | Central      | 0 | 0 | 0 | 0 | 0 | 0 |
| 1749 | Human | Northeastern | 0 | 0 | 0 | 0 | 0 | 0 |
| 1750 | Human | Central      | 0 | 0 | 0 | 0 | 0 | 0 |
| 1751 | Human | Eastern      | 0 | 0 | 0 | 0 | 0 | 0 |
| 1752 | Human | Central      | 0 | 0 | 0 | 0 | 0 | 0 |
| 1753 | Human | Central      | 0 | 0 | 0 | 0 | 0 | 0 |
| 1754 | Human | Eastern      | 0 | 0 | 0 | 0 | 0 | 0 |
| 1755 | Human | Central      | 0 | 0 | 0 | 0 | 0 | 0 |
| 1756 | Human | Central      | 0 | 0 | 0 | 0 | 0 | 0 |
| 1757 | Human | Central      | 0 | 0 | 0 | 0 | 0 | 0 |
| 1758 | Human | Central      | 0 | 0 | 0 | 0 | 0 | 0 |
| 1759 | Human | Central      | 0 | 0 | 0 | 0 | 0 | 0 |
| 1760 | Human | Central      | 0 | 0 | 0 | 0 | 0 | 0 |
| 1761 | Human | Central      | 0 | 0 | 0 | 0 | 0 | 0 |
| 1762 | Human | Central      | 0 | 0 | 0 | 0 | 0 | 0 |
| 1763 | Human | Central      | 0 | 0 | 0 | 0 | 0 | 0 |
| 1764 | Human | Central      | 0 | 0 | 0 | 0 | 0 | 0 |
| 1765 | Human | Central      | 0 | 0 | 0 | 0 | 0 | 0 |
| 1766 | Human | Northeastern | 0 | 0 | 0 | 0 | 0 | 0 |
| 1767 | Human | Central      | 0 | 0 | 0 | 0 | 0 | 0 |
| 1768 | Human | Central      | 0 | 0 | 0 | 0 | 0 | 0 |
| 1769 | Human | Central      | 0 | 0 | 0 | 0 | 0 | 0 |
| 1770 | Human | Central      | 0 | 0 | 0 | 0 | 0 | 0 |
| 1771 | Human | Central      | 0 | 0 | 0 | 0 | 0 | 0 |
| 1772 | Human | Central      | 0 | 0 | 0 | 0 | 0 | 0 |
| 1773 | Human | Central      | 0 | 0 | 0 | 0 | 0 | 0 |
| 1774 | Human | Central      | 0 | 0 | 0 | 1 | 0 | 1 |
| 1775 | Human | Central      | 0 | 0 | 0 | 0 | 0 | 0 |

|      |       |              |   |   |   |   |   |   |
|------|-------|--------------|---|---|---|---|---|---|
| 1776 | Human | Central      | 0 | 0 | 0 | 0 | 0 | 0 |
| 1777 | Human | Central      | 0 | 0 | 0 | 0 | 0 | 0 |
| 1778 | Human | Central      | 0 | 0 | 0 | 0 | 0 | 0 |
| 1779 | Human | Central      | 0 | 0 | 0 | 0 | 0 | 0 |
| 1780 | Human | Southern     | 0 | 0 | 0 | 0 | 0 | 0 |
| 1781 | Human | Central      | 0 | 0 | 0 | 0 | 0 | 0 |
| 1782 | Human | Central      | 0 | 0 | 0 | 0 | 0 | 0 |
| 1783 | Human | Central      | 0 | 0 | 0 | 0 | 0 | 0 |
| 1784 | Human | Eastern      | 0 | 0 | 0 | 0 | 0 | 0 |
| 1785 | Human | Central      | 0 | 0 | 0 | 0 | 0 | 0 |
| 1786 | Human | Central      | 0 | 0 | 0 | 0 | 0 | 0 |
| 1787 | Human | Central      | 0 | 0 | 0 | 0 | 0 | 0 |
| 1788 | Human | Central      | 0 | 0 | 0 | 0 | 0 | 0 |
| 1789 | Human | Eastern      | 0 | 0 | 0 | 0 | 0 | 0 |
| 1790 | Human | Southern     | 0 | 0 | 0 | 0 | 0 | 0 |
| 1791 | Human | Southern     | 0 | 0 | 0 | 0 | 0 | 0 |
| 1792 | Human | Eastern      | 0 | 0 | 0 | 0 | 0 | 0 |
| 1793 | Human | Central      | 0 | 0 | 0 | 0 | 0 | 0 |
| 1794 | Human | Central      | 0 | 0 | 0 | 0 | 0 | 0 |
| 1795 | Human | Northeastern | 0 | 0 | 0 | 0 | 0 | 0 |
| 1796 | Human | Central      | 0 | 0 | 0 | 0 | 0 | 0 |
| 1797 | Human | Central      | 0 | 0 | 0 | 0 | 0 | 0 |
| 1798 | Human | Central      | 0 | 0 | 0 | 0 | 0 | 0 |
| 1799 | Human | Eastern      | 0 | 0 | 0 | 0 | 0 | 0 |
| 1800 | Human | Central      | 0 | 0 | 0 | 0 | 0 | 0 |
| 1801 | Human | Central      | 0 | 0 | 0 | 0 | 0 | 0 |
| 1802 | Human | Central      | 0 | 0 | 0 | 0 | 0 | 0 |
| 1803 | Human | Central      | 0 | 0 | 0 | 0 | 0 | 0 |
| 1804 | Human | Central      | 0 | 0 | 0 | 0 | 0 | 0 |
| 1805 | Human | Central      | 0 | 0 | 0 | 0 | 0 | 0 |
| 1806 | Human | Central      | 0 | 0 | 0 | 0 | 0 | 0 |
| 1807 | Human | Central      | 0 | 0 | 0 | 0 | 0 | 0 |
| 1808 | Human | Eastern      | 0 | 0 | 0 | 0 | 0 | 0 |
| 1809 | Human | Central      | 0 | 0 | 0 | 0 | 0 | 0 |
| 1810 | Human | Southern     | 0 | 0 | 0 | 0 | 0 | 0 |
| 1811 | Human | Southern     | 0 | 0 | 0 | 0 | 0 | 0 |
| 1812 | Human | Southern     | 0 | 0 | 0 | 0 | 0 | 0 |
| 1813 | Human | Northeastern | 0 | 0 | 0 | 0 | 0 | 0 |
| 1814 | Human | Central      | 0 | 0 | 0 | 0 | 0 | 0 |
| 1815 | Human | Central      | 0 | 0 | 0 | 0 | 0 | 0 |
| 1816 | Human | Central      | 0 | 0 | 0 | 0 | 0 | 0 |
| 1817 | Human | Central      | 0 | 0 | 0 | 0 | 0 | 0 |
| 1818 | Human | Central      | 0 | 0 | 0 | 0 | 0 | 0 |
| 1819 | Human | Eastern      | 0 | 0 | 0 | 1 | 0 | 1 |
| 1820 | Human | Central      | 0 | 0 | 0 | 1 | 0 | 1 |
| 1821 | Human | Central      | 0 | 0 | 0 | 0 | 0 | 0 |
| 1822 | Human | Central      | 0 | 0 | 0 | 0 | 0 | 0 |
| 1823 | Human | Eastern      | 0 | 0 | 0 | 0 | 0 | 0 |

|      |       |              |   |   |   |   |   |   |
|------|-------|--------------|---|---|---|---|---|---|
| 1824 | Human | Eastern      | 0 | 0 | 0 | 0 | 0 | 0 |
| 1825 | Human | Central      | 0 | 0 | 0 | 0 | 0 | 0 |
| 1826 | Human | Central      | 0 | 0 | 0 | 0 | 0 | 0 |
| 1827 | Human | Southern     | 0 | 0 | 0 | 0 | 0 | 0 |
| 1828 | Human | Central      | 0 | 0 | 0 | 0 | 0 | 0 |
| 1829 | Human | Central      | 0 | 0 | 0 | 0 | 0 | 0 |
| 1830 | Human | Central      | 0 | 0 | 0 | 0 | 0 | 0 |
| 1831 | Human | Central      | 0 | 0 | 0 | 0 | 0 | 0 |
| 1832 | Human | Central      | 0 | 0 | 0 | 0 | 0 | 0 |
| 1833 | Human | Central      | 0 | 0 | 0 | 0 | 0 | 0 |
| 1834 | Human | Central      | 0 | 0 | 0 | 0 | 0 | 0 |
| 1835 | Human | Central      | 0 | 0 | 0 | 0 | 0 | 0 |
| 1836 | Human | Central      | 0 | 0 | 0 | 0 | 0 | 0 |
| 1837 | Human | Eastern      | 0 | 0 | 0 | 0 | 0 | 0 |
| 1838 | Human | Eastern      | 0 | 0 | 0 | 0 | 0 | 0 |
| 1839 | Human | Central      | 0 | 0 | 0 | 0 | 0 | 0 |
| 1840 | Human | Central      | 0 | 0 | 0 | 0 | 0 | 0 |
| 1841 | Human | Central      | 0 | 0 | 0 | 0 | 0 | 0 |
| 1842 | Human | Central      | 0 | 0 | 0 | 0 | 0 | 0 |
| 1843 | Human | Central      | 0 | 0 | 0 | 0 | 0 | 0 |
| 1844 | Human | Central      | 0 | 0 | 0 | 0 | 0 | 0 |
| 1845 | Human | Central      | 0 | 0 | 0 | 0 | 0 | 0 |
| 1846 | Human | Southern     | 0 | 0 | 0 | 0 | 0 | 0 |
| 1847 | Human | Southern     | 0 | 0 | 0 | 0 | 0 | 0 |
| 1848 | Human | Central      | 0 | 0 | 0 | 0 | 0 | 0 |
| 1849 | Human | Eastern      | 0 | 0 | 0 | 0 | 0 | 0 |
| 1850 | Human | Central      | 0 | 0 | 0 | 0 | 0 | 0 |
| 1851 | Human | Central      | 0 | 0 | 0 | 0 | 0 | 0 |
| 1852 | Human | Central      | 0 | 0 | 0 | 0 | 0 | 0 |
| 1853 | Human | Northeastern | 0 | 0 | 0 | 0 | 0 | 0 |
| 1854 | Human | Central      | 0 | 0 | 0 | 0 | 0 | 0 |
| 1855 | Human | Central      | 0 | 0 | 0 | 0 | 0 | 0 |
| 1856 | Human | Central      | 0 | 0 | 0 | 0 | 0 | 0 |
| 1857 | Human | Central      | 0 | 0 | 0 | 0 | 0 | 0 |
| 1858 | Human | Central      | 0 | 0 | 0 | 0 | 0 | 0 |
| 1859 | Human | Central      | 0 | 0 | 0 | 0 | 0 | 0 |
| 1860 | Human | Eastern      | 0 | 0 | 0 | 0 | 0 | 0 |
| 1861 | Human | Central      | 0 | 0 | 0 | 0 | 0 | 0 |
| 1862 | Human | Central      | 0 | 0 | 0 | 0 | 0 | 0 |
| 1863 | Human | Eastern      | 0 | 0 | 0 | 0 | 0 | 0 |
| 1864 | Human | Central      | 0 | 0 | 0 | 0 | 0 | 0 |
| 1865 | Human | Central      | 0 | 0 | 0 | 0 | 0 | 0 |
| 1866 | Human | Central      | 0 | 0 | 0 | 0 | 0 | 0 |
| 1867 | Human | Central      | 0 | 0 | 0 | 0 | 0 | 0 |
| 1868 | Human | Central      | 0 | 0 | 0 | 0 | 0 | 0 |
| 1869 | Human | Eastern      | 0 | 0 | 0 | 0 | 0 | 0 |
| 1870 | Human | Central      | 0 | 0 | 0 | 0 | 0 | 0 |
| 1871 | Human | Central      | 0 | 0 | 0 | 0 | 0 | 0 |

|      |       |              |   |   |   |   |   |   |
|------|-------|--------------|---|---|---|---|---|---|
| 1872 | Human | Central      | 0 | 0 | 0 | 0 | 0 | 0 |
| 1873 | Human | Southern     | 0 | 0 | 0 | 1 | 0 | 1 |
| 1874 | Human | Central      | 0 | 0 | 0 | 0 | 0 | 0 |
| 1875 | Human | Central      | 0 | 0 | 0 | 0 | 0 | 0 |
| 1876 | Human | Central      | 0 | 0 | 0 | 0 | 0 | 0 |
| 1877 | Human | Central      | 0 | 0 | 0 | 0 | 0 | 0 |
| 1878 | Human | Eastern      | 0 | 0 | 0 | 0 | 0 | 0 |
| 1879 | Human | Central      | 0 | 0 | 0 | 0 | 0 | 0 |
| 1880 | Human | Central      | 0 | 0 | 0 | 0 | 0 | 0 |
| 1881 | Human | Southern     | 0 | 0 | 0 | 0 | 0 | 0 |
| 1882 | Human | Central      | 0 | 0 | 0 | 0 | 0 | 0 |
| 1883 | Human | Central      | 0 | 0 | 0 | 0 | 0 | 0 |
| 1884 | Human | Central      | 0 | 0 | 0 | 0 | 0 | 0 |
| 1885 | Human | Central      | 0 | 0 | 0 | 0 | 0 | 0 |
| 1886 | Human | Northeastern | 0 | 0 | 0 | 0 | 0 | 0 |
| 1887 | Human | Eastern      | 1 | 0 | 0 | 1 | 0 | 1 |
| 1888 | Human | Central      | 0 | 0 | 0 | 0 | 0 | 0 |
| 1889 | Human | Central      | 0 | 0 | 0 | 0 | 0 | 0 |
| 1890 | Human | Central      | 0 | 0 | 0 | 0 | 0 | 0 |
| 1891 | Human | Central      | 0 | 0 | 0 | 0 | 0 | 0 |
| 1892 | Human | Central      | 0 | 0 | 0 | 0 | 0 | 0 |
| 1893 | Human | Central      | 0 | 0 | 0 | 0 | 0 | 0 |
| 1894 | Human | Central      | 0 | 0 | 0 | 0 | 0 | 0 |
| 1895 | Human | Central      | 0 | 0 | 0 | 0 | 0 | 0 |
| 1896 | Human | Eastern      | 0 | 0 | 0 | 0 | 0 | 0 |
| 1897 | Human | Central      | 0 | 0 | 0 | 0 | 0 | 0 |
| 1898 | Human | Central      | 0 | 0 | 0 | 0 | 0 | 0 |
| 1899 | Human | Central      | 0 | 0 | 0 | 0 | 0 | 0 |
| 1900 | Human | Central      | 0 | 0 | 0 | 0 | 0 | 0 |
| 1901 | Human | Central      | 0 | 0 | 0 | 0 | 0 | 0 |
| 1902 | Human | Northeastern | 0 | 0 | 0 | 0 | 0 | 0 |
| 1903 | Human | Central      | 0 | 0 | 0 | 0 | 0 | 0 |
| 1904 | Human | Central      | 0 | 0 | 0 | 0 | 0 | 0 |
| 1905 | Human | Eastern      | 0 | 0 | 0 | 0 | 0 | 0 |
| 1906 | Human | Eastern      | 0 | 0 | 0 | 0 | 0 | 0 |
| 1907 | Human | Central      | 0 | 0 | 0 | 0 | 0 | 0 |
| 1908 | Human | Central      | 0 | 0 | 0 | 0 | 0 | 0 |
| 1909 | Human | Central      | 0 | 0 | 0 | 0 | 0 | 0 |
| 1910 | Human | Central      | 0 | 0 | 0 | 0 | 0 | 0 |
| 1911 | Human | Eastern      | 0 | 0 | 0 | 0 | 0 | 0 |
| 1912 | Human | Central      | 0 | 0 | 0 | 0 | 0 | 0 |
| 1913 | Human | Central      | 0 | 0 | 0 | 0 | 0 | 0 |
| 1914 | Human | Central      | 0 | 0 | 0 | 0 | 0 | 0 |
| 1915 | Human | Central      | 0 | 0 | 0 | 0 | 0 | 0 |
| 1916 | Human | Central      | 0 | 0 | 0 | 0 | 0 | 0 |
| 1917 | Human | Central      | 0 | 0 | 0 | 0 | 0 | 0 |
| 1918 | Human | Central      | 0 | 0 | 0 | 0 | 0 | 0 |
| 1919 | Human | Central      | 0 | 0 | 0 | 0 | 0 | 0 |



|      |       |              |   |   |   |   |   |   |
|------|-------|--------------|---|---|---|---|---|---|
| 1920 | Human | Central      | 0 | 0 | 0 | 0 | 0 | 0 |
| 1921 | Human | Central      | 0 | 0 | 0 | 0 | 0 | 0 |
| 1922 | Human | Central      | 0 | 0 | 0 | 0 | 0 | 0 |
| 1923 | Human | Central      | 0 | 0 | 0 | 0 | 0 | 0 |
| 1924 | Human | Central      | 0 | 0 | 0 | 0 | 0 | 0 |
| 1925 | Human | Central      | 0 | 0 | 0 | 0 | 0 | 0 |
| 1926 | Human | Northern     | 0 | 0 | 0 | 0 | 0 | 0 |
| 1927 | Human | Central      | 0 | 0 | 0 | 0 | 0 | 0 |
| 1928 | Human | Central      | 0 | 0 | 0 | 0 | 0 | 0 |
| 1929 | Human | Central      | 0 | 0 | 0 | 0 | 0 | 0 |
| 1930 | Human | Central      | 0 | 0 | 0 | 0 | 0 | 0 |
| 1931 | Human | Central      | 0 | 0 | 0 | 0 | 0 | 0 |
| 1932 | Human | Central      | 0 | 0 | 0 | 0 | 0 | 0 |
| 1933 | Human | Central      | 0 | 0 | 0 | 0 | 0 | 0 |
| 1934 | Human | Eastern      | 0 | 0 | 0 | 0 | 0 | 0 |
| 1935 | Human | Central      | 0 | 0 | 0 | 0 | 0 | 0 |
| 1936 | Human | Eastern      | 0 | 0 | 0 | 0 | 0 | 0 |
| 1937 | Human | Central      | 0 | 0 | 0 | 0 | 0 | 0 |
| 1938 | Human | Eastern      | 0 | 0 | 0 | 0 | 0 | 0 |
| 1939 | Human | Eastern      | 0 | 0 | 0 | 0 | 0 | 0 |
| 1940 | Human | Central      | 0 | 0 | 0 | 0 | 0 | 0 |
| 1941 | Human | Central      | 0 | 0 | 0 | 0 | 0 | 0 |
| 1942 | Human | Central      | 0 | 0 | 0 | 0 | 0 | 0 |
| 1943 | Human | Central      | 0 | 0 | 0 | 0 | 0 | 0 |
| 1944 | Human | Central      | 0 | 0 | 0 | 0 | 0 | 0 |
| 1945 | Human | Central      | 0 | 0 | 0 | 0 | 0 | 0 |
| 1946 | Human | Central      | 0 | 0 | 0 | 0 | 0 | 0 |
| 1947 | Human | Central      | 0 | 0 | 0 | 0 | 0 | 0 |
| 1948 | Human | Central      | 0 | 0 | 0 | 0 | 0 | 0 |
| 1949 | Human | Central      | 0 | 0 | 0 | 0 | 0 | 0 |
| 1950 | Human | Central      | 0 | 0 | 0 | 0 | 0 | 0 |
| 1951 | Human | Central      | 0 | 0 | 0 | 0 | 0 | 0 |
| 1952 | Human | Central      | 0 | 0 | 0 | 0 | 0 | 0 |
| 1953 | Human | Central      | 0 | 0 | 0 | 0 | 0 | 0 |
| 1954 | Human | Central      | 0 | 0 | 0 | 0 | 0 | 0 |
| 1955 | Human | Northeastern | 0 | 0 | 0 | 0 | 0 | 0 |
| 1956 | Human | Northern     | 0 | 0 | 0 | 0 | 0 | 0 |
| 1957 | Human | Central      | 0 | 0 | 0 | 0 | 0 | 0 |
| 1958 | Human | Central      | 0 | 0 | 0 | 0 | 0 | 0 |
| 1959 | Human | Central      | 0 | 0 | 0 | 0 | 0 | 0 |
| 1960 | Human | Central      | 0 | 0 | 0 | 0 | 0 | 0 |
| 1961 | Human | Central      | 0 | 0 | 0 | 0 | 0 | 0 |
| 1962 | Human | Central      | 0 | 0 | 0 | 0 | 0 | 0 |
| 1963 | Human | Central      | 0 | 0 | 0 | 0 | 0 | 0 |
| 1964 | Human | Central      | 0 | 0 | 0 | 0 | 0 | 0 |
| 1965 | Human | Central      | 0 | 0 | 0 | 0 | 0 | 0 |
| 1966 | Human | Eastern      | 0 | 0 | 0 | 0 | 0 | 0 |
| 1967 | Human | Central      | 0 | 0 | 0 | 0 | 0 | 0 |

|      |        |              |   |   |   |   |   |   |
|------|--------|--------------|---|---|---|---|---|---|
| 1968 | Human  | Northern     | 0 | 0 | 0 | 0 | 0 | 0 |
| 1969 | Human  | Central      | 0 | 0 | 0 | 0 | 0 | 0 |
| 1970 | Human  | Central      | 0 | 0 | 0 | 0 | 0 | 0 |
| 1971 | Human  | Central      | 0 | 0 | 0 | 0 | 0 | 0 |
| 1972 | Human  | Eastern      | 0 | 0 | 0 | 0 | 0 | 0 |
| 1973 | Human  | Eastern      | 0 | 0 | 0 | 0 | 0 | 0 |
| 1974 | Human  | Central      | 0 | 0 | 0 | 0 | 0 | 0 |
| 1975 | Human  | Central      | 0 | 0 | 0 | 0 | 0 | 0 |
| 1976 | Human  | Central      | 0 | 0 | 0 | 0 | 0 | 0 |
| 1977 | Human  | Eastern      | 0 | 0 | 0 | 0 | 0 | 0 |
| 1978 | Human  | Central      | 0 | 0 | 0 | 0 | 0 | 0 |
| 1979 | Human  | Eastern      | 0 | 0 | 0 | 0 | 0 | 0 |
| 1980 | Human  | Northeastern | 0 | 0 | 0 | 0 | 0 | 0 |
| 1981 | Human  | Central      | 0 | 0 | 0 | 0 | 0 | 0 |
| 1982 | Human  | Central      | 0 | 0 | 0 | 0 | 0 | 0 |
| 1983 | Human  | Central      | 0 | 0 | 0 | 0 | 0 | 0 |
| 1984 | Human  | Central      | 0 | 0 | 0 | 0 | 0 | 0 |
| 1985 | Human  | Central      | 0 | 0 | 0 | 0 | 0 | 0 |
| 1986 | Human  | Central      | 0 | 0 | 0 | 0 | 0 | 0 |
| 1987 | Human  | Central      | 0 | 0 | 0 | 0 | 0 | 0 |
| 1988 | Human  | Central      | 0 | 0 | 0 | 0 | 0 | 0 |
| 1989 | Human  | Central      | 0 | 0 | 0 | 0 | 0 | 0 |
| 1990 | Human  | Northeastern | 0 | 0 | 0 | 0 | 0 | 0 |
| 1991 | Cattle | Central      | 0 | 0 | 0 | 0 | 0 | 0 |
| 1992 | Cattle | Central      | 0 | 0 | 0 | 0 | 0 | 0 |
| 1993 | Cattle | Central      | 0 | 0 | 0 | 0 | 0 | 0 |
| 1994 | Cattle | Central      | 0 | 0 | 0 | 0 | 0 | 0 |
| 1995 | Cattle | Central      | 0 | 0 | 0 | 0 | 0 | 0 |
| 1996 | Cattle | Central      | 0 | 0 | 0 | 0 | 0 | 0 |
| 1997 | Cattle | Central      | 0 | 0 | 0 | 0 | 0 | 0 |
| 1998 | Cattle | Central      | 0 | 0 | 0 | 0 | 0 | 0 |
| 1999 | Cattle | Central      | 0 | 0 | 0 | 0 | 0 | 0 |
| 2000 | Cattle | Central      | 0 | 0 | 0 | 0 | 0 | 0 |
| 2001 | Cattle | Central      | 0 | 0 | 0 | 1 | 0 | 1 |
| 2002 | Cattle | Central      | 0 | 0 | 0 | 1 | 0 | 1 |
| 2003 | Cattle | Central      | 0 | 0 | 0 | 0 | 0 | 0 |
| 2004 | Cattle | Central      | 0 | 0 | 0 | 0 | 0 | 0 |
| 2005 | Cattle | Central      | 0 | 0 | 0 | 0 | 0 | 0 |
| 2006 | Cattle | Central      | 0 | 0 | 0 | 0 | 0 | 0 |
| 2007 | Cattle | Central      | 0 | 0 | 0 | 0 | 0 | 0 |
| 2008 | Cattle | Central      | 0 | 0 | 0 | 1 | 0 | 1 |
| 2009 | Cattle | Central      | 0 | 0 | 0 | 1 | 0 | 1 |
| 2010 | Cattle | Central      | 0 | 0 | 0 | 0 | 0 | 0 |
| 2011 | Cattle | Central      | 0 | 0 | 0 | 0 | 0 | 0 |
| 2012 | Cattle | Central      | 0 | 0 | 0 | 0 | 0 | 0 |
| 2013 | Cattle | Central      | 0 | 0 | 0 | 1 | 0 | 1 |
| 2014 | Cattle | Central      | 0 | 0 | 0 | 0 | 0 | 0 |
| 2015 | Cattle | Central      | 0 | 0 | 0 | 0 | 0 | 0 |

|      |        |         |   |   |   |   |   |   |
|------|--------|---------|---|---|---|---|---|---|
| 2016 | Cattle | Central | 0 | 0 | 0 | 0 | 0 | 0 |
| 2017 | Cattle | Central | 0 | 0 | 0 | 0 | 0 | 0 |
| 2018 | Cattle | Central | 0 | 0 | 0 | 0 | 0 | 0 |
| 2019 | Cattle | Central | 0 | 0 | 0 | 0 | 0 | 0 |
| 2020 | Cattle | Central | 0 | 0 | 0 | 0 | 0 | 0 |
| 2021 | Cattle | Central | 0 | 0 | 0 | 0 | 0 | 0 |
| 2022 | Cattle | Central | 0 | 0 | 1 | 1 | 0 | 1 |
| 2023 | Cattle | Central | 0 | 0 | 1 | 1 | 0 | 1 |
| 2024 | Cattle | Central | 0 | 0 | 0 | 0 | 0 | 0 |
| 2025 | Cattle | Central | 0 | 0 | 0 | 0 | 0 | 0 |
| 2026 | Cattle | Central | 0 | 0 | 1 | 1 | 0 | 1 |
| 2027 | Cattle | Central | 0 | 0 | 0 | 0 | 0 | 0 |
| 2028 | Cattle | Central | 0 | 0 | 0 | 0 | 0 | 0 |
| 2029 | Cattle | Central | 0 | 0 | 0 | 0 | 0 | 0 |
| 2030 | Cattle | Central | 0 | 0 | 0 | 0 | 0 | 0 |
| 2031 | Cattle | Central | 0 | 0 | 0 | 0 | 0 | 0 |
| 2032 | Cattle | Central | 0 | 0 | 0 | 0 | 0 | 0 |
| 2033 | Cattle | Central | 0 | 0 | 0 | 0 | 0 | 0 |
| 2034 | Cattle | Central | 0 | 0 | 0 | 1 | 0 | 1 |
| 2035 | Cattle | Central | 0 | 0 | 0 | 1 | 0 | 1 |
| 2036 | Cattle | Central | 0 | 0 | 0 | 0 | 0 | 0 |
| 2037 | Cattle | Central | 0 | 0 | 1 | 1 | 0 | 1 |
| 2038 | Cattle | Central | 0 | 0 | 0 | 0 | 0 | 0 |
| 2039 | Cattle | Central | 0 | 0 | 0 | 1 | 0 | 1 |
| 2040 | Cattle | Central | 0 | 0 | 1 | 1 | 0 | 1 |
| 2041 | Cattle | Central | 0 | 0 | 0 | 1 | 0 | 1 |
| 2042 | Cattle | Central | 0 | 0 | 0 | 1 | 0 | 1 |
| 2043 | Cattle | Central | 0 | 0 | 0 | 0 | 0 | 0 |
| 2044 | Cattle | Central | 0 | 0 | 0 | 0 | 0 | 0 |
| 2045 | Cattle | Central | 0 | 0 | 0 | 0 | 0 | 0 |
| 2046 | Cattle | Central | 0 | 0 | 0 | 0 | 0 | 0 |
| 2047 | Cattle | Central | 0 | 0 | 0 | 0 | 0 | 0 |
| 2048 | Cattle | Central | 0 | 0 | 0 | 0 | 0 | 0 |
| 2049 | Cattle | Central | 0 | 0 | 0 | 0 | 0 | 0 |
| 2050 | Cattle | Central | 0 | 0 | 0 | 0 | 0 | 0 |
| 2051 | Cattle | Central | 0 | 0 | 0 | 0 | 0 | 0 |
| 2052 | Cattle | Central | 0 | 0 | 0 | 0 | 0 | 0 |
| 2053 | Cattle | Central | 0 | 0 | 0 | 0 | 0 | 0 |
| 2054 | Cattle | Central | 0 | 0 | 0 | 0 | 0 | 0 |
| 2055 | Cattle | Central | 0 | 0 | 0 | 0 | 0 | 0 |
| 2056 | Cattle | Central | 0 | 0 | 0 | 0 | 0 | 0 |
| 2057 | Cattle | Central | 0 | 0 | 0 | 0 | 0 | 0 |
| 2058 | Cattle | Central | 0 | 0 | 0 | 0 | 0 | 0 |
| 2059 | Cattle | Central | 0 | 0 | 0 | 0 | 0 | 0 |
| 2060 | Cattle | Central | 0 | 0 | 0 | 0 | 0 | 0 |
| 2061 | Cattle | Central | 0 | 0 | 0 | 0 | 0 | 0 |
| 2062 | Cattle | Central | 0 | 0 | 0 | 0 | 0 | 0 |
| 2063 | Cattle | Central | 0 | 0 | 0 | 0 | 0 | 0 |

|      |        |              |   |   |   |   |   |   |
|------|--------|--------------|---|---|---|---|---|---|
| 2064 | Cattle | Central      | 0 | 0 | 0 | 0 | 0 | 0 |
| 2065 | Cattle | Central      | 0 | 0 | 0 | 0 | 0 | 0 |
| 2066 | Cattle | Central      | 0 | 0 | 0 | 0 | 0 | 0 |
| 2067 | Cattle | Central      | 0 | 0 | 0 | 0 | 1 | 1 |
| 2068 | Cattle | Central      | 0 | 0 | 0 | 0 | 0 | 0 |
| 2069 | Cattle | Central      | 0 | 0 | 0 | 0 | 0 | 0 |
| 2070 | Cattle | Central      | 0 | 0 | 0 | 1 | 0 | 1 |
| 2071 | Cattle | Central      | 0 | 0 | 0 | 0 | 0 | 0 |
| 2072 | Cattle | Central      | 0 | 0 | 0 | 0 | 0 | 0 |
| 2073 | Cattle | Central      | 0 | 0 | 0 | 0 | 0 | 0 |
| 2074 | Cattle | Central      | 0 | 0 | 0 | 0 | 0 | 0 |
| 2075 | Cattle | Central      | 0 | 0 | 0 | 0 | 0 | 0 |
| 2076 | Cattle | Central      | 0 | 0 | 0 | 0 | 0 | 0 |
| 2077 | Cattle | Central      | 0 | 0 | 0 | 0 | 0 | 0 |
| 2078 | Cattle | Central      | 0 | 0 | 0 | 0 | 0 | 0 |
| 2079 | Cattle | Central      | 0 | 0 | 0 | 0 | 0 | 0 |
| 2080 | Cattle | Central      | 0 | 0 | 0 | 0 | 0 | 0 |
| 2081 | Cattle | Central      | 0 | 0 | 0 | 0 | 0 | 0 |
| 2082 | Cattle | Central      | 0 | 0 | 0 | 0 | 0 | 0 |
| 2083 | Cattle | Central      | 0 | 0 | 0 | 0 | 0 | 0 |
| 2084 | Cattle | Central      | 0 | 0 | 0 | 0 | 0 | 0 |
| 2085 | Cattle | Central      | 0 | 0 | 0 | 0 | 0 | 0 |
| 2086 | Cattle | Central      | 0 | 0 | 0 | 0 | 0 | 0 |
| 2087 | Cattle | Central      | 0 | 0 | 0 | 0 | 0 | 0 |
| 2088 | Cattle | Central      | 0 | 0 | 0 | 0 | 0 | 0 |
| 2089 | Cattle | Central      | 0 | 0 | 0 | 0 | 0 | 0 |
| 2090 | Cattle | Central      | 0 | 0 | 0 | 0 | 0 | 0 |
| 2091 | Cattle | Central      | 0 | 0 | 0 | 0 | 0 | 0 |
| 2092 | Cattle | Central      | 0 | 0 | 0 | 0 | 0 | 0 |
| 2093 | Cattle | Central      | 0 | 0 | 0 | 0 | 0 | 0 |
| 2094 | Cattle | Central      | 0 | 0 | 0 | 0 | 0 | 0 |
| 2095 | Cattle | Central      | 0 | 0 | 0 | 0 | 0 | 0 |
| 2096 | Cattle | Central      | 0 | 0 | 0 | 0 | 0 | 0 |
| 2097 | Cattle | Central      | 0 | 0 | 0 | 0 | 0 | 0 |
| 2098 | Cattle | Central      | 0 | 0 | 0 | 0 | 0 | 0 |
| 2099 | Cattle | Central      | 0 | 0 | 0 | 0 | 0 | 0 |
| 2100 | Cattle | Central      | 0 | 0 | 0 | 0 | 0 | 0 |
| 2101 | Cattle | Central      | 0 | 0 | 0 | 0 | 0 | 0 |
| 2102 | Cattle | Central      | 0 | 0 | 0 | 0 | 0 | 0 |
| 2103 | Cattle | Central      | 0 | 0 | 0 | 0 | 0 | 0 |
| 2104 | Cattle | Central      | 0 | 0 | 0 | 0 | 0 | 0 |
| 2105 | Cattle | Central      | 0 | 0 | 0 | 0 | 0 | 0 |
| 2106 | Cattle | Central      | 0 | 0 | 0 | 0 | 0 | 0 |
| 2107 | Cattle | Central      | 0 | 0 | 0 | 0 | 0 | 0 |
| 2108 | Cattle | Central      | 0 | 0 | 0 | 0 | 0 | 0 |
| 2109 | Cattle | Northeastern | 0 | 0 | 0 | 0 | 0 | 0 |
| 2110 | Cattle | Northeastern | 0 | 0 | 0 | 0 | 0 | 0 |
| 2111 | Cattle | Northeastern | 0 | 0 | 0 | 0 | 0 | 0 |

|      |        |              |   |   |   |   |   |   |
|------|--------|--------------|---|---|---|---|---|---|
| 2112 | Cattle | Northeastern | 0 | 0 | 0 | 0 | 0 | 0 |
| 2113 | Cattle | Northeastern | 0 | 0 | 0 | 0 | 0 | 0 |
| 2114 | Cattle | Northeastern | 0 | 0 | 0 | 0 | 0 | 0 |
| 2115 | Cattle | Northeastern | 0 | 0 | 0 | 0 | 0 | 0 |
| 2116 | Cattle | Northeastern | 0 | 0 | 0 | 0 | 0 | 0 |
| 2117 | Cattle | Northeastern | 0 | 0 | 0 | 0 | 0 | 0 |
| 2118 | Cattle | Northeastern | 0 | 0 | 0 | 0 | 0 | 0 |
| 2119 | Cattle | Northeastern | 0 | 0 | 0 | 0 | 0 | 0 |
| 2120 | Cattle | Northeastern | 0 | 0 | 0 | 0 | 0 | 0 |
| 2121 | Cattle | Northeastern | 0 | 0 | 0 | 0 | 0 | 0 |
| 2122 | Cattle | Northeastern | 0 | 0 | 0 | 0 | 0 | 0 |
| 2123 | Cattle | Northeastern | 0 | 0 | 0 | 0 | 0 | 0 |
| 2124 | Cattle | Northeastern | 0 | 0 | 0 | 0 | 0 | 0 |
| 2125 | Cattle | Northeastern | 0 | 0 | 0 | 0 | 0 | 0 |
| 2126 | Cattle | Northeastern | 0 | 0 | 0 | 0 | 0 | 0 |
| 2127 | Cattle | Northeastern | 0 | 0 | 0 | 0 | 0 | 0 |
| 2128 | Cattle | Northeastern | 0 | 0 | 0 | 0 | 0 | 0 |
| 2129 | Cattle | Northeastern | 0 | 0 | 0 | 0 | 0 | 0 |
| 2130 | Cattle | Northeastern | 0 | 0 | 0 | 0 | 0 | 0 |
| 2131 | Cattle | Northeastern | 0 | 0 | 0 | 0 | 0 | 0 |
| 2132 | Cattle | Northeastern | 0 | 0 | 0 | 0 | 0 | 0 |
| 2133 | Cattle | Northeastern | 0 | 0 | 0 | 0 | 0 | 0 |
| 2134 | Cattle | Northeastern | 0 | 0 | 0 | 0 | 0 | 0 |
| 2135 | Cattle | Northeastern | 0 | 0 | 0 | 0 | 0 | 0 |
| 2136 | Cattle | Northeastern | 0 | 0 | 0 | 0 | 0 | 0 |
| 2137 | Cattle | Northeastern | 0 | 0 | 0 | 0 | 0 | 0 |
| 2138 | Cattle | Northeastern | 0 | 0 | 0 | 0 | 0 | 0 |
| 2139 | Cattle | Northeastern | 0 | 0 | 0 | 0 | 0 | 0 |
| 2140 | Cattle | Northeastern | 0 | 0 | 0 | 0 | 0 | 0 |
| 2141 | Cattle | Northeastern | 0 | 0 | 0 | 0 | 0 | 0 |
| 2142 | Cattle | Northeastern | 0 | 0 | 0 | 0 | 0 | 0 |
| 2143 | Cattle | Northeastern | 0 | 0 | 0 | 0 | 0 | 0 |
| 2144 | Cattle | Northeastern | 0 | 0 | 0 | 0 | 0 | 0 |
| 2145 | Cattle | Northeastern | 0 | 0 | 0 | 0 | 0 | 0 |
| 2146 | Cattle | Northeastern | 0 | 0 | 0 | 0 | 0 | 0 |
| 2147 | Cattle | Northeastern | 0 | 0 | 0 | 0 | 0 | 0 |
| 2148 | Cattle | Northeastern | 0 | 0 | 0 | 0 | 0 | 0 |
| 2149 | Cattle | Northeastern | 0 | 0 | 0 | 0 | 0 | 0 |
| 2150 | Cattle | Northeastern | 0 | 0 | 0 | 0 | 0 | 0 |
| 2151 | Cattle | Northeastern | 0 | 0 | 0 | 0 | 0 | 0 |
| 2152 | Cattle | Northeastern | 0 | 0 | 0 | 0 | 0 | 0 |
| 2153 | Cattle | Northeastern | 0 | 0 | 0 | 0 | 0 | 0 |
| 2154 | Cattle | Northeastern | 0 | 0 | 0 | 0 | 0 | 0 |
| 2155 | Cattle | Northeastern | 0 | 1 | 0 | 0 | 0 | 1 |
| 2156 | Cattle | Northeastern | 0 | 0 | 0 | 0 | 0 | 0 |
| 2157 | Cattle | Northeastern | 0 | 0 | 0 | 0 | 0 | 0 |
| 2158 | Cattle | Northeastern | 0 | 0 | 0 | 0 | 0 | 0 |
| 2159 | Cattle | Northeastern | 0 | 0 | 0 | 0 | 0 | 0 |

|      |        |              |   |   |   |   |   |   |
|------|--------|--------------|---|---|---|---|---|---|
| 2160 | Cattle | Northeastern | 0 | 0 | 0 | 0 | 0 | 0 |
| 2161 | Cattle | Northeastern | 0 | 0 | 0 | 0 | 0 | 0 |
| 2162 | Cattle | Northeastern | 0 | 0 | 0 | 0 | 0 | 0 |
| 2163 | Cattle | Northeastern | 0 | 0 | 0 | 0 | 0 | 0 |
| 2164 | Cattle | Northeastern | 0 | 0 | 0 | 0 | 0 | 0 |
| 2165 | Cattle | Northeastern | 0 | 0 | 0 | 0 | 0 | 0 |
| 2166 | Cattle | Northeastern | 0 | 0 | 0 | 0 | 0 | 0 |
| 2167 | Cattle | Northeastern | 0 | 0 | 0 | 0 | 0 | 0 |
| 2168 | Cattle | Northeastern | 0 | 0 | 0 | 0 | 0 | 0 |
| 2169 | Cattle | Northeastern | 0 | 0 | 0 | 0 | 0 | 0 |
| 2170 | Cattle | Northeastern | 0 | 0 | 0 | 0 | 0 | 0 |
| 2171 | Cattle | Northeastern | 0 | 0 | 0 | 0 | 0 | 0 |
| 2172 | Cattle | Northeastern | 0 | 0 | 0 | 0 | 0 | 0 |
| 2173 | Cattle | Northeastern | 0 | 0 | 0 | 0 | 0 | 0 |
| 2174 | Cattle | Northeastern | 0 | 0 | 0 | 0 | 0 | 0 |
| 2175 | Cattle | Northeastern | 0 | 1 | 0 | 0 | 0 | 1 |
| 2176 | Cattle | Northeastern | 0 | 0 | 0 | 1 | 0 | 1 |
| 2177 | Cattle | Northeastern | 0 | 0 | 0 | 0 | 0 | 0 |
| 2178 | Cattle | Northeastern | 0 | 0 | 0 | 0 | 0 | 0 |
| 2179 | Cattle | Northeastern | 0 | 0 | 0 | 0 | 0 | 0 |
| 2180 | Cattle | Northeastern | 0 | 0 | 0 | 0 | 0 | 0 |
| 2181 | Cattle | Northeastern | 0 | 0 | 0 | 0 | 0 | 0 |
| 2182 | Cattle | Northeastern | 0 | 0 | 0 | 0 | 0 | 0 |
| 2183 | Cattle | Northeastern | 0 | 0 | 0 | 0 | 0 | 0 |
| 2184 | Cattle | Northeastern | 0 | 0 | 0 | 0 | 0 | 0 |
| 2185 | Cattle | Northeastern | 0 | 0 | 0 | 0 | 0 | 0 |
| 2186 | Cattle | Northeastern | 0 | 0 | 0 | 0 | 0 | 0 |
| 2187 | Cattle | Northeastern | 0 | 0 | 0 | 0 | 0 | 0 |
| 2188 | Cattle | Northeastern | 0 | 0 | 0 | 0 | 0 | 0 |
| 2189 | Cattle | Northeastern | 0 | 0 | 0 | 0 | 0 | 0 |
| 2190 | Cattle | Northeastern | 0 | 0 | 0 | 0 | 0 | 0 |
| 2191 | Cattle | Northeastern | 0 | 0 | 0 | 0 | 0 | 0 |
| 2192 | Cattle | Northeastern | 0 | 0 | 0 | 0 | 0 | 0 |
| 2193 | Cattle | Northeastern | 0 | 0 | 0 | 0 | 0 | 0 |
| 2194 | Cattle | Northeastern | 0 | 0 | 0 | 0 | 0 | 0 |
| 2195 | Cattle | Northeastern | 0 | 0 | 0 | 0 | 0 | 0 |
| 2196 | Cattle | Northeastern | 0 | 0 | 0 | 0 | 0 | 0 |
| 2197 | Cattle | Northeastern | 0 | 0 | 0 | 0 | 0 | 0 |
| 2198 | Cattle | Northeastern | 0 | 0 | 0 | 0 | 0 | 0 |
| 2199 | Cattle | Northeastern | 0 | 0 | 0 | 0 | 0 | 0 |
| 2200 | Cattle | Northeastern | 0 | 0 | 0 | 0 | 0 | 0 |
| 2201 | Cattle | Northeastern | 0 | 0 | 0 | 0 | 0 | 0 |
| 2202 | Cattle | Central      | 0 | 0 | 0 | 0 | 0 | 0 |
| 2203 | Cattle | Central      | 0 | 0 | 0 | 0 | 0 | 0 |
| 2204 | Cattle | Central      | 0 | 0 | 0 | 0 | 0 | 0 |
| 2205 | Cattle | Central      | 0 | 0 | 0 | 0 | 0 | 0 |
| 2206 | Cattle | Central      | 0 | 0 | 0 | 0 | 0 | 0 |
| 2207 | Cattle | Central      | 0 | 0 | 0 | 0 | 0 | 0 |

|      |        |         |   |   |   |   |   |   |
|------|--------|---------|---|---|---|---|---|---|
| 2208 | Cattle | Central | 0 | 0 | 0 | 0 | 0 | 0 |
| 2209 | Cattle | Central | 0 | 0 | 0 | 0 | 0 | 0 |
| 2210 | Cattle | Central | 0 | 0 | 0 | 0 | 0 | 0 |
| 2211 | Cattle | Central | 0 | 0 | 0 | 0 | 0 | 0 |
| 2212 | Cattle | Central | 0 | 0 | 0 | 0 | 0 | 0 |
| 2213 | Cattle | Central | 0 | 0 | 0 | 0 | 0 | 0 |
| 2214 | Cattle | Central | 0 | 0 | 0 | 0 | 0 | 0 |
| 2215 | Cattle | Central | 0 | 0 | 0 | 0 | 0 | 0 |
| 2216 | Cattle | Central | 0 | 0 | 0 | 0 | 0 | 0 |
| 2217 | Cattle | Central | 0 | 0 | 0 | 0 | 0 | 0 |
| 2218 | Cattle | Central | 0 | 0 | 0 | 0 | 0 | 0 |
| 2219 | Cattle | Central | 0 | 0 | 0 | 0 | 0 | 0 |
| 2220 | Cattle | Central | 0 | 0 | 0 | 0 | 0 | 0 |
| 2221 | Cattle | Central | 0 | 0 | 0 | 0 | 0 | 0 |
| 2222 | Cattle | Central | 0 | 0 | 0 | 0 | 0 | 0 |
| 2223 | Cattle | Central | 0 | 0 | 0 | 0 | 0 | 0 |
| 2224 | Cattle | Central | 0 | 0 | 0 | 0 | 0 | 0 |
| 2225 | Cattle | Central | 0 | 0 | 0 | 0 | 0 | 0 |
| 2226 | Cattle | Central | 0 | 0 | 0 | 0 | 0 | 0 |
| 2227 | Cattle | Central | 0 | 0 | 0 | 0 | 0 | 0 |
| 2228 | Cattle | Central | 0 | 0 | 0 | 0 | 0 | 0 |
| 2229 | Cattle | Central | 0 | 0 | 0 | 0 | 0 | 0 |
| 2230 | Cattle | Central | 0 | 0 | 0 | 0 | 0 | 0 |
| 2231 | Cattle | Central | 0 | 0 | 0 | 0 | 0 | 0 |
| 2232 | Cattle | Central | 0 | 0 | 0 | 0 | 0 | 0 |
| 2233 | Cattle | Central | 0 | 0 | 0 | 0 | 1 | 1 |
| 2234 | Cattle | Central | 0 | 0 | 0 | 0 | 0 | 0 |
| 2235 | Cattle | Central | 0 | 0 | 0 | 0 | 0 | 0 |
| 2236 | Cattle | Central | 0 | 0 | 0 | 0 | 0 | 0 |
| 2237 | Cattle | Central | 0 | 0 | 0 | 0 | 0 | 0 |
| 2238 | Cattle | Central | 0 | 0 | 0 | 0 | 0 | 0 |
| 2239 | Cattle | Central | 0 | 0 | 0 | 0 | 0 | 0 |
| 2240 | Cattle | Central | 0 | 0 | 0 | 0 | 0 | 0 |
| 2241 | Cattle | Central | 0 | 0 | 0 | 0 | 0 | 0 |
| 2242 | Cattle | Central | 0 | 0 | 0 | 0 | 0 | 0 |
| 2243 | Cattle | Central | 0 | 0 | 0 | 0 | 0 | 0 |
| 2244 | Cattle | Central | 0 | 0 | 0 | 0 | 0 | 0 |
| 2245 | Cattle | Central | 0 | 0 | 0 | 0 | 0 | 0 |
| 2246 | Cattle | Central | 0 | 0 | 0 | 0 | 0 | 0 |
| 2247 | Cattle | Central | 0 | 0 | 0 | 0 | 0 | 0 |
| 2248 | Cattle | Central | 0 | 0 | 0 | 0 | 0 | 0 |
| 2249 | Cattle | Central | 0 | 0 | 0 | 0 | 0 | 0 |
| 2250 | Cattle | Central | 0 | 0 | 0 | 0 | 0 | 0 |
| 2251 | Cattle | Central | 0 | 0 | 0 | 0 | 0 | 0 |
| 2252 | Cattle | Central | 0 | 0 | 0 | 0 | 0 | 0 |
| 2253 | Cattle | Central | 0 | 0 | 0 | 0 | 0 | 0 |
| 2254 | Cattle | Central | 0 | 0 | 0 | 0 | 0 | 0 |
| 2255 | Cattle | Central | 0 | 0 | 0 | 0 | 0 | 0 |

|      |        |         |   |   |   |   |   |   |
|------|--------|---------|---|---|---|---|---|---|
| 2256 | Cattle | Central | 0 | 0 | 0 | 0 | 0 | 0 |
| 2257 | Cattle | Central | 0 | 0 | 0 | 0 | 0 | 0 |
| 2258 | Cattle | Central | 0 | 0 | 0 | 0 | 0 | 0 |
| 2259 | Cattle | Central | 0 | 0 | 0 | 0 | 0 | 0 |
| 2260 | Cattle | Central | 0 | 0 | 0 | 0 | 0 | 0 |
| 2261 | Cattle | Central | 0 | 0 | 0 | 0 | 0 | 0 |
| 2262 | Cattle | Central | 0 | 0 | 0 | 0 | 0 | 0 |
| 2263 | Cattle | Central | 0 | 0 | 0 | 0 | 0 | 0 |
| 2264 | Cattle | Central | 0 | 0 | 0 | 0 | 0 | 0 |
| 2265 | Cattle | Central | 0 | 0 | 0 | 0 | 0 | 0 |
| 2266 | Cattle | Central | 0 | 0 | 0 | 0 | 0 | 0 |
| 2267 | Cattle | Central | 0 | 0 | 0 | 0 | 0 | 0 |
| 2268 | Cattle | Central | 0 | 0 | 0 | 0 | 0 | 0 |
| 2269 | Cattle | Central | 0 | 0 | 0 | 0 | 0 | 0 |
| 2270 | Cattle | Central | 0 | 0 | 0 | 0 | 0 | 0 |
| 2271 | Cattle | Central | 0 | 0 | 0 | 0 | 0 | 0 |
| 2272 | Cattle | Central | 0 | 0 | 0 | 0 | 0 | 0 |
| 2273 | Cattle | Central | 0 | 0 | 0 | 0 | 0 | 0 |
| 2274 | Cattle | Central | 0 | 0 | 0 | 0 | 0 | 0 |
| 2275 | Cattle | Central | 0 | 0 | 0 | 0 | 0 | 0 |
| 2276 | Cattle | Central | 0 | 0 | 0 | 1 | 0 | 1 |
| 2277 | Cattle | Central | 0 | 0 | 0 | 1 | 1 | 1 |
| 2278 | Cattle | Central | 0 | 0 | 0 | 0 | 0 | 0 |
| 2279 | Cattle | Central | 0 | 0 | 0 | 0 | 0 | 0 |
| 2280 | Cattle | Central | 0 | 0 | 0 | 0 | 0 | 0 |
| 2281 | Cattle | Central | 0 | 0 | 0 | 0 | 0 | 0 |
| 2282 | Cattle | Central | 0 | 0 | 0 | 0 | 0 | 0 |
| 2283 | Cattle | Central | 0 | 0 | 0 | 0 | 0 | 0 |
| 2284 | Cattle | Central | 0 | 0 | 0 | 0 | 0 | 0 |
| 2285 | Cattle | Central | 0 | 0 | 0 | 0 | 0 | 0 |
| 2286 | Cattle | Central | 0 | 0 | 0 | 0 | 0 | 0 |
| 2287 | Cattle | Central | 0 | 0 | 0 | 0 | 0 | 0 |
| 2288 | Cattle | Central | 0 | 0 | 0 | 0 | 0 | 0 |
| 2289 | Cattle | Central | 0 | 0 | 0 | 0 | 0 | 0 |
| 2290 | Cattle | Central | 0 | 0 | 0 | 0 | 0 | 0 |
| 2291 | Cattle | Central | 0 | 0 | 0 | 0 | 0 | 0 |
| 2292 | Cattle | Central | 0 | 0 | 0 | 0 | 0 | 0 |
| 2293 | Cattle | Central | 0 | 0 | 0 | 0 | 0 | 0 |
| 2294 | Cattle | Central | 0 | 0 | 0 | 0 | 0 | 0 |
| 2295 | Cattle | Central | 0 | 0 | 0 | 0 | 0 | 0 |
| 2296 | Cattle | Central | 0 | 0 | 0 | 0 | 0 | 0 |
| 2297 | Cattle | Central | 0 | 0 | 0 | 0 | 0 | 0 |
| 2298 | Cattle | Central | 0 | 0 | 0 | 0 | 1 | 1 |
| 2299 | Cattle | Central | 0 | 0 | 0 | 0 | 0 | 0 |
| 2300 | Cattle | Central | 0 | 0 | 0 | 0 | 0 | 0 |
| 2301 | Cattle | Central | 0 | 0 | 0 | 0 | 0 | 0 |
| 2302 | Cattle | Central | 0 | 0 | 0 | 0 | 0 | 0 |
| 2303 | Cattle | Central | 0 | 0 | 0 | 1 | 0 | 1 |



|      |        |              |   |   |   |   |   |   |
|------|--------|--------------|---|---|---|---|---|---|
| 2304 | Cattle | Central      | 0 | 0 | 0 | 0 | 0 | 0 |
| 2305 | Cattle | Central      | 0 | 0 | 0 | 0 | 0 | 0 |
| 2306 | Cattle | Central      | 0 | 0 | 1 | 1 | 0 | 1 |
| 2307 | Cattle | Central      | 0 | 0 | 0 | 1 | 0 | 1 |
| 2308 | Cattle | Central      | 0 | 0 | 0 | 0 | 0 | 0 |
| 2309 | Cattle | Central      | 0 | 0 | 0 | 0 | 0 | 0 |
| 2310 | Cattle | Central      | 0 | 0 | 0 | 0 | 0 | 0 |
| 2311 | Cattle | Central      | 0 | 0 | 0 | 0 | 0 | 0 |
| 2312 | Cattle | Central      | 0 | 0 | 0 | 1 | 0 | 1 |
| 2313 | Cattle | Central      | 0 | 0 | 0 | 0 | 0 | 0 |
| 2314 | Cattle | Central      | 0 | 0 | 1 | 0 | 0 | 1 |
| 2315 | Cattle | Central      | 0 | 0 | 1 | 1 | 0 | 1 |
| 2316 | Cattle | Central      | 0 | 0 | 1 | 1 | 0 | 1 |
| 2317 | Cattle | Central      | 0 | 0 | 1 | 0 | 0 | 1 |
| 2318 | Cattle | Central      | 0 | 0 | 1 | 0 | 0 | 1 |
| 2319 | Cattle | Central      | 0 | 0 | 1 | 0 | 0 | 1 |
| 2320 | Cattle | Central      | 0 | 0 | 0 | 0 | 0 | 0 |
| 2321 | Cattle | Central      | 0 | 0 | 0 | 0 | 0 | 0 |
| 2322 | Cattle | Central      | 0 | 0 | 1 | 0 | 0 | 1 |
| 2323 | Cattle | Central      | 0 | 0 | 0 | 0 | 0 | 0 |
| 2324 | Cattle | Central      | 0 | 0 | 0 | 0 | 0 | 0 |
| 2325 | Cattle | Central      | 0 | 0 | 0 | 0 | 0 | 0 |
| 2326 | Cattle | Central      | 0 | 0 | 0 | 0 | 0 | 0 |
| 2327 | Cattle | Central      | 0 | 0 | 0 | 0 | 0 | 0 |
| 2328 | Cattle | Central      | 0 | 0 | 0 | 0 | 0 | 0 |
| 2329 | Cattle | Central      | 0 | 0 | 0 | 0 | 0 | 0 |
| 2330 | Cattle | Central      | 0 | 0 | 0 | 0 | 0 | 0 |
| 2331 | Cattle | Central      | 0 | 0 | 0 | 0 | 0 | 0 |
| 2332 | Cattle | Central      | 0 | 0 | 0 | 0 | 0 | 0 |
| 2333 | Cattle | Southern     | 0 | 0 | 0 | 1 | 0 | 1 |
| 2334 | Cattle | Southern     | 0 | 0 | 0 | 0 | 0 | 0 |
| 2335 | Cattle | Southern     | 0 | 0 | 1 | 1 | 1 | 1 |
| 2336 | Cattle | Southern     | 0 | 0 | 1 | 0 | 0 | 1 |
| 2337 | Cattle | Southern     | 0 | 0 | 0 | 0 | 0 | 0 |
| 2338 | Cattle | Southern     | 0 | 0 | 0 | 0 | 0 | 0 |
| 2339 | Cattle | Southern     | 0 | 0 | 0 | 0 | 0 | 0 |
| 2340 | Cattle | Southern     | 0 | 0 | 0 | 0 | 0 | 0 |
| 2341 | Cattle | Southern     | 0 | 0 | 0 | 0 | 0 | 0 |
| 2342 | Cattle | Southern     | 0 | 0 | 0 | 0 | 0 | 0 |
| 2343 | Cattle | Southern     | 0 | 0 | 0 | 0 | 0 | 0 |
| 2344 | Cattle | Southern     | 0 | 0 | 0 | 0 | 0 | 0 |
| 2345 | Cattle | Southern     | 0 | 0 | 0 | 0 | 0 | 0 |
| 2346 | Cattle | Northeastern | 0 | 0 | 0 | 0 | 0 | 0 |
| 2347 | Cattle | Northeastern | 0 | 0 | 0 | 0 | 0 | 0 |
| 2348 | Cattle | Northeastern | 0 | 0 | 0 | 0 | 0 | 0 |
| 2349 | Cattle | Northeastern | 0 | 0 | 0 | 0 | 0 | 0 |
| 2350 | Cattle | Northeastern | 0 | 0 | 0 | 0 | 0 | 0 |
| 2351 | Cattle | Northeastern | 0 | 0 | 0 | 1 | 0 | 1 |

|      |        |              |   |   |   |   |   |   |
|------|--------|--------------|---|---|---|---|---|---|
| 2352 | Cattle | Northeastern | 0 | 0 | 0 | 1 | 0 | 1 |
| 2353 | Cattle | Northeastern | 1 | 0 | 0 | 0 | 0 | 1 |
| 2354 | Cattle | Northeastern | 0 | 0 | 0 | 0 | 0 | 0 |
| 2355 | Cattle | Northeastern | 0 | 0 | 0 | 0 | 1 | 1 |
| 2356 | Cattle | Northeastern | 0 | 0 | 0 | 0 | 1 | 1 |
| 2357 | Cattle | Northeastern | 0 | 0 | 0 | 0 | 1 | 1 |
| 2358 | Cattle | Northeastern | 0 | 0 | 0 | 0 | 0 | 0 |
| 2359 | Cattle | Northeastern | 0 | 0 | 0 | 0 | 0 | 0 |
| 2360 | Cattle | Northeastern | 0 | 0 | 0 | 0 | 0 | 0 |
| 2361 | Cattle | Northeastern | 0 | 0 | 0 | 0 | 0 | 0 |
| 2362 | Cattle | Northeastern | 0 | 0 | 0 | 0 | 0 | 0 |
| 2363 | Cattle | Northeastern | 0 | 0 | 0 | 0 | 0 | 0 |
| 2364 | Cattle | Northeastern | 0 | 0 | 0 | 0 | 0 | 0 |
| 2365 | Cattle | Central      | 0 | 0 | 0 | 0 | 0 | 0 |
| 2366 | Cattle | Central      | 0 | 0 | 0 | 0 | 0 | 0 |
| 2367 | Cattle | Central      | 0 | 0 | 0 | 0 | 0 | 0 |
| 2368 | Cattle | Central      | 0 | 0 | 0 | 0 | 0 | 0 |
| 2369 | Cattle | Central      | 0 | 0 | 0 | 0 | 0 | 0 |
| 2370 | Cattle | Central      | 0 | 0 | 0 | 0 | 0 | 0 |
| 2371 | Cattle | Central      | 0 | 0 | 0 | 1 | 0 | 1 |
| 2372 | Cattle | Central      | 0 | 0 | 0 | 0 | 0 | 0 |
| 2373 | Cattle | Central      | 0 | 0 | 0 | 0 | 0 | 0 |
| 2374 | Cattle | Central      | 0 | 0 | 0 | 0 | 0 | 0 |
| 2375 | Cattle | Central      | 0 | 0 | 0 | 1 | 0 | 1 |
| 2376 | Cattle | Central      | 0 | 0 | 0 | 0 | 0 | 0 |
| 2377 | Cattle | Central      | 0 | 0 | 0 | 0 | 0 | 0 |
| 2378 | Cattle | Central      | 0 | 0 | 0 | 0 | 0 | 0 |
| 2379 | Cattle | Central      | 0 | 0 | 0 | 0 | 0 | 0 |
| 2380 | Cattle | Central      | 0 | 0 | 0 | 0 | 0 | 0 |
| 2381 | Cattle | Central      | 0 | 0 | 0 | 0 | 0 | 0 |
| 2382 | Cattle | Central      | 0 | 0 | 0 | 0 | 0 | 0 |
| 2383 | Cattle | Central      | 0 | 0 | 0 | 0 | 0 | 0 |
| 2384 | Cattle | Central      | 0 | 0 | 0 | 0 | 0 | 0 |
| 2385 | Cattle | Central      | 0 | 0 | 0 | 0 | 0 | 0 |
| 2386 | Cattle | Central      | 0 | 0 | 0 | 0 | 0 | 0 |
| 2387 | Cattle | Central      | 0 | 0 | 0 | 0 | 0 | 0 |
| 2388 | Cattle | Central      | 0 | 0 | 0 | 0 | 0 | 0 |
| 2389 | Cattle | Central      | 0 | 0 | 0 | 0 | 0 | 0 |
| 2390 | Cattle | Central      | 0 | 0 | 0 | 0 | 0 | 0 |
| 2391 | Cattle | Central      | 0 | 0 | 0 | 0 | 0 | 0 |
| 2392 | Cattle | Central      | 0 | 0 | 0 | 0 | 0 | 0 |
| 2393 | Cattle | Central      | 0 | 0 | 0 | 0 | 0 | 0 |
| 2394 | Cattle | Central      | 0 | 0 | 0 | 0 | 0 | 0 |
| 2395 | Cattle | Central      | 0 | 0 | 0 | 0 | 0 | 0 |
| 2396 | Cattle | Central      | 0 | 0 | 0 | 0 | 0 | 0 |
| 2397 | Cattle | Central      | 0 | 0 | 0 | 0 | 0 | 0 |
| 2398 | Cattle | Central      | 0 | 0 | 0 | 0 | 0 | 0 |
| 2399 | Cattle | Central      | 0 | 0 | 0 | 0 | 0 | 0 |

|      |        |         |   |   |   |   |   |   |
|------|--------|---------|---|---|---|---|---|---|
| 2400 | Cattle | Central | 0 | 0 | 0 | 0 | 0 | 0 |
| 2401 | Cattle | Central | 0 | 0 | 0 | 0 | 0 | 0 |
| 2402 | Cattle | Central | 0 | 0 | 0 | 0 | 0 | 0 |
| 2403 | Cattle | Central | 0 | 0 | 0 | 0 | 0 | 0 |
| 2404 | Cattle | Central | 0 | 0 | 0 | 0 | 0 | 0 |
| 2405 | Cattle | Central | 0 | 0 | 0 | 0 | 0 | 0 |
| 2406 | Cattle | Central | 0 | 0 | 0 | 0 | 0 | 0 |
| 2407 | Cattle | Central | 0 | 0 | 0 | 0 | 0 | 0 |
| 2408 | Cattle | Central | 0 | 0 | 0 | 0 | 0 | 0 |
| 2409 | Cattle | Central | 0 | 0 | 0 | 0 | 0 | 0 |
| 2410 | Cattle | Central | 0 | 0 | 0 | 0 | 0 | 0 |
| 2411 | Cattle | Central | 0 | 0 | 0 | 0 | 0 | 0 |
| 2412 | Cattle | Central | 0 | 0 | 0 | 0 | 0 | 0 |
| 2413 | Cattle | Central | 0 | 0 | 0 | 0 | 0 | 0 |
| 2414 | Cattle | Central | 0 | 0 | 0 | 0 | 0 | 0 |
| 2415 | Cattle | Central | 0 | 0 | 0 | 0 | 0 | 0 |
| 2416 | Cattle | Central | 0 | 0 | 0 | 0 | 0 | 0 |
| 2417 | Cattle | Central | 0 | 0 | 0 | 0 | 0 | 0 |
| 2418 | Cattle | Central | 1 | 0 | 0 | 0 | 0 | 1 |
| 2419 | Cattle | Central | 0 | 0 | 0 | 0 | 0 | 0 |
| 2420 | Cattle | Central | 0 | 0 | 0 | 1 | 0 | 1 |
| 2421 | Cattle | Central | 0 | 0 | 0 | 0 | 0 | 0 |
| 2422 | Cattle | Central | 0 | 0 | 0 | 0 | 0 | 0 |
| 2423 | Cattle | Central | 0 | 0 | 0 | 0 | 0 | 0 |
| 2424 | Cattle | Central | 0 | 0 | 0 | 0 | 0 | 0 |
| 2425 | Cattle | Central | 0 | 0 | 0 | 0 | 0 | 0 |
| 2426 | Cattle | Central | 0 | 0 | 0 | 0 | 0 | 0 |
| 2427 | Cattle | Central | 0 | 0 | 0 | 0 | 0 | 0 |
| 2428 | Cattle | Central | 0 | 0 | 0 | 0 | 0 | 0 |
| 2429 | Cattle | Central | 0 | 0 | 0 | 0 | 0 | 0 |
| 2430 | Cattle | Central | 0 | 0 | 0 | 0 | 0 | 0 |
| 2431 | Cattle | Central | 0 | 0 | 0 | 0 | 0 | 0 |
| 2432 | Cattle | Central | 0 | 0 | 0 | 0 | 0 | 0 |
| 2433 | Cattle | Central | 0 | 0 | 0 | 1 | 0 | 1 |
| 2434 | Cattle | Central | 0 | 0 | 0 | 0 | 0 | 0 |
| 2435 | Cattle | Central | 0 | 0 | 0 | 0 | 0 | 0 |
| 2436 | Cattle | Central | 0 | 0 | 0 | 0 | 0 | 0 |
| 2437 | Cattle | Central | 0 | 0 | 0 | 0 | 0 | 0 |
| 2438 | Cattle | Central | 0 | 0 | 0 | 0 | 0 | 0 |
| 2439 | Cattle | Central | 0 | 0 | 0 | 0 | 0 | 0 |
| 2440 | Cattle | Central | 0 | 0 | 1 | 0 | 0 | 1 |
| 2441 | Cattle | Central | 0 | 0 | 0 | 0 | 0 | 0 |
| 2442 | Cattle | Central | 0 | 0 | 1 | 1 | 0 | 1 |
| 2443 | Cattle | Central | 0 | 0 | 0 | 1 | 0 | 1 |
| 2444 | Cattle | Central | 0 | 0 | 0 | 0 | 0 | 0 |
| 2445 | Cattle | Central | 0 | 0 | 0 | 0 | 0 | 0 |
| 2446 | Cattle | Central | 0 | 0 | 0 | 0 | 0 | 0 |
| 2447 | Cattle | Central | 0 | 0 | 0 | 0 | 0 | 0 |

|      |        |         |   |   |   |   |   |   |
|------|--------|---------|---|---|---|---|---|---|
| 2448 | Cattle | Central | 0 | 0 | 0 | 0 | 0 | 0 |
| 2449 | Cattle | Central | 0 | 0 | 1 | 0 | 0 | 1 |
| 2450 | Cattle | Central | 0 | 0 | 1 | 0 | 0 | 1 |
| 2451 | Cattle | Central | 0 | 0 | 1 | 0 | 0 | 1 |
| 2452 | Cattle | Central | 0 | 0 | 1 | 0 | 0 | 1 |
| 2453 | Cattle | Central | 0 | 0 | 1 | 0 | 0 | 1 |
| 2454 | Cattle | Central | 0 | 0 | 0 | 0 | 0 | 0 |
| 2455 | Cattle | Central | 0 | 0 | 0 | 0 | 0 | 0 |
| 2456 | Cattle | Central | 0 | 0 | 0 | 0 | 0 | 0 |
| 2457 | Cattle | Central | 0 | 0 | 1 | 1 | 0 | 1 |
| 2458 | Cattle | Central | 0 | 0 | 1 | 1 | 0 | 1 |
| 2459 | Cattle | Central | 0 | 0 | 0 | 0 | 0 | 0 |
| 2460 | Cattle | Central | 0 | 0 | 0 | 0 | 0 | 0 |
| 2461 | Cattle | Central | 0 | 0 | 1 | 0 | 0 | 1 |
| 2462 | Cattle | Central | 0 | 0 | 0 | 0 | 0 | 0 |
| 2463 | Cattle | Central | 0 | 0 | 0 | 0 | 0 | 0 |
| 2464 | Cattle | Central | 0 | 0 | 0 | 0 | 0 | 0 |
| 2465 | Cattle | Central | 0 | 0 | 0 | 0 | 0 | 0 |
| 2466 | Cattle | Central | 0 | 0 | 1 | 1 | 0 | 1 |
| 2467 | Cattle | Central | 0 | 0 | 1 | 0 | 0 | 1 |
| 2468 | Cattle | Central | 0 | 0 | 0 | 0 | 0 | 0 |
| 2469 | Cattle | Central | 0 | 0 | 1 | 0 | 0 | 1 |
| 2470 | Cattle | Central | 0 | 0 | 1 | 0 | 0 | 1 |
| 2471 | Cattle | Central | 0 | 0 | 0 | 0 | 0 | 0 |
| 2472 | Cattle | Central | 0 | 0 | 0 | 0 | 0 | 0 |
| 2473 | Cattle | Central | 0 | 0 | 1 | 0 | 0 | 1 |
| 2474 | Cattle | Central | 0 | 0 | 0 | 0 | 0 | 0 |
| 2475 | Cattle | Central | 0 | 0 | 1 | 0 | 0 | 1 |
| 2476 | Cattle | Central | 0 | 0 | 1 | 0 | 0 | 1 |
| 2477 | Cattle | Central | 0 | 0 | 0 | 0 | 0 | 0 |
| 2478 | Cattle | Central | 0 | 0 | 0 | 0 | 0 | 0 |
| 2479 | Cattle | Central | 0 | 0 | 1 | 1 | 0 | 1 |
| 2480 | Cattle | Central | 0 | 0 | 0 | 0 | 0 | 0 |
| 2481 | Cattle | Central | 0 | 0 | 0 | 0 | 0 | 0 |
| 2482 | Cattle | Central | 0 | 0 | 0 | 0 | 0 | 0 |
| 2483 | Cattle | Central | 0 | 0 | 0 | 0 | 0 | 0 |
| 2484 | Cattle | Central | 0 | 0 | 1 | 0 | 0 | 1 |
| 2485 | Cattle | Central | 0 | 0 | 1 | 0 | 0 | 1 |
| 2486 | Cattle | Central | 0 | 0 | 0 | 0 | 0 | 0 |
| 2487 | Cattle | Central | 0 | 1 | 0 | 1 | 0 | 1 |
| 2488 | Cattle | Central | 0 | 0 | 0 | 0 | 0 | 0 |
| 2489 | Cattle | Central | 0 | 0 | 1 | 1 | 1 | 1 |
| 2490 | Cattle | Central | 0 | 0 | 0 | 0 | 0 | 0 |
| 2491 | Cattle | Central | 0 | 0 | 0 | 0 | 0 | 0 |
| 2492 | Cattle | Central | 0 | 0 | 0 | 1 | 0 | 1 |
| 2493 | Cattle | Central | 0 | 0 | 1 | 1 | 0 | 1 |
| 2494 | Cattle | Central | 0 | 0 | 0 | 1 | 0 | 1 |
| 2495 | Cattle | Central | 0 | 0 | 0 | 1 | 0 | 1 |

|      |        |         |   |   |   |   |   |   |
|------|--------|---------|---|---|---|---|---|---|
| 2496 | Cattle | Central | 0 | 0 | 1 | 1 | 0 | 1 |
| 2497 | Cattle | Central | 0 | 0 | 1 | 0 | 0 | 1 |
| 2498 | Cattle | Central | 0 | 0 | 0 | 0 | 0 | 0 |
| 2499 | Cattle | Central | 0 | 0 | 0 | 1 | 1 | 1 |
| 2500 | Cattle | Central | 0 | 0 | 1 | 1 | 0 | 1 |
| 2501 | Cattle | Central | 0 | 0 | 0 | 0 | 0 | 0 |
| 2502 | Cattle | Central | 0 | 0 | 0 | 0 | 0 | 0 |
| 2503 | Cattle | Central | 0 | 0 | 0 | 0 | 0 | 0 |
| 2504 | Cattle | Central | 0 | 0 | 0 | 0 | 0 | 0 |
| 2505 | Cattle | Central | 0 | 0 | 0 | 0 | 0 | 0 |
| 2506 | Cattle | Central | 0 | 0 | 0 | 0 | 0 | 0 |
| 2507 | Cattle | Central | 0 | 0 | 0 | 0 | 0 | 0 |
| 2508 | Cattle | Central | 0 | 0 | 0 | 1 | 0 | 1 |
| 2509 | Cattle | Central | 0 | 0 | 0 | 1 | 0 | 1 |
| 2510 | Cattle | Central | 0 | 0 | 0 | 1 | 0 | 1 |
| 2511 | Cattle | Central | 0 | 0 | 0 | 0 | 0 | 0 |
| 2512 | Cattle | Central | 0 | 0 | 0 | 0 | 0 | 0 |
| 2513 | Cattle | Central | 0 | 0 | 0 | 0 | 0 | 0 |
| 2514 | Cattle | Central | 0 | 0 | 0 | 1 | 0 | 1 |
| 2515 | Cattle | Central | 0 | 0 | 0 | 0 | 0 | 1 |
| 2516 | Cattle | Central | 0 | 0 | 0 | 0 | 0 | 0 |
| 2517 | Cattle | Central | 0 | 0 | 0 | 0 | 0 | 0 |
| 2518 | Cattle | Central | 0 | 0 | 0 | 0 | 0 | 0 |
| 2519 | Cattle | Central | 0 | 0 | 0 | 0 | 0 | 0 |
| 2520 | Cattle | Central | 0 | 0 | 0 | 0 | 0 | 0 |
| 2521 | Cattle | Central | 0 | 0 | 0 | 0 | 0 | 0 |
| 2522 | Cattle | Central | 0 | 0 | 0 | 0 | 0 | 0 |
| 2523 | Cattle | Central | 0 | 0 | 0 | 0 | 0 | 0 |
| 2524 | Cattle | Central | 0 | 0 | 0 | 0 | 0 | 0 |
| 2525 | Cattle | Central | 0 | 0 | 0 | 0 | 0 | 0 |
| 2526 | Cattle | Central | 0 | 0 | 0 | 0 | 0 | 0 |
| 2527 | Cattle | Central | 0 | 0 | 1 | 0 | 0 | 1 |
| 2528 | Cattle | Central | 0 | 0 | 0 | 0 | 0 | 0 |
| 2529 | Cattle | Central | 0 | 0 | 0 | 0 | 0 | 0 |
| 2530 | Cattle | Central | 0 | 0 | 0 | 0 | 0 | 0 |
| 2531 | Cattle | Central | 0 | 0 | 0 | 0 | 0 | 0 |
| 2532 | Cattle | Central | 0 | 0 | 0 | 0 | 0 | 0 |
| 2533 | Cattle | Central | 0 | 0 | 1 | 0 | 0 | 1 |
| 2534 | Cattle | Central | 0 | 0 | 0 | 0 | 0 | 0 |
| 2535 | Cattle | Central | 0 | 0 | 0 | 0 | 0 | 0 |
| 2536 | Cattle | Central | 0 | 0 | 0 | 0 | 0 | 0 |
| 2537 | Cattle | Central | 0 | 0 | 0 | 1 | 0 | 1 |
| 2538 | Cattle | Central | 0 | 0 | 1 | 1 | 0 | 1 |
| 2539 | Cattle | Central | 0 | 0 | 1 | 1 | 0 | 1 |
| 2540 | Cattle | Central | 0 | 0 | 0 | 0 | 0 | 0 |
| 2541 | Cattle | Central | 0 | 0 | 0 | 0 | 0 | 0 |
| 2542 | Cattle | Central | 0 | 0 | 0 | 0 | 0 | 0 |
| 2543 | Cattle | Central | 0 | 0 | 0 | 1 | 0 | 1 |

|      |        |         |   |   |   |   |   |   |
|------|--------|---------|---|---|---|---|---|---|
| 2544 | Cattle | Central | 0 | 0 | 0 | 0 | 0 | 0 |
| 2545 | Cattle | Central | 0 | 0 | 0 | 0 | 0 | 0 |
| 2546 | Cattle | Central | 0 | 0 | 0 | 0 | 0 | 0 |
| 2547 | Cattle | Central | 0 | 0 | 0 | 0 | 0 | 0 |
| 2548 | Cattle | Central | 0 | 0 | 0 | 0 | 0 | 0 |
| 2549 | Cattle | Central | 0 | 0 | 0 | 0 | 0 | 0 |
| 2550 | Cattle | Central | 0 | 0 | 0 | 0 | 0 | 0 |
| 2551 | Cattle | Central | 0 | 0 | 0 | 0 | 0 | 0 |
| 2552 | Cattle | Central | 0 | 0 | 0 | 0 | 0 | 0 |
| 2553 | Cattle | Central | 0 | 0 | 0 | 0 | 0 | 0 |
| 2554 | Cattle | Central | 0 | 0 | 0 | 0 | 0 | 0 |
| 2555 | Cattle | Central | 0 | 0 | 0 | 0 | 0 | 0 |
| 2556 | Cattle | Central | 0 | 0 | 0 | 0 | 0 | 0 |
| 2557 | Cattle | Central | 0 | 0 | 0 | 0 | 0 | 0 |
| 2558 | Cattle | Central | 0 | 0 | 0 | 0 | 0 | 0 |
| 2559 | Cattle | Central | 0 | 0 | 0 | 0 | 0 | 0 |
| 2560 | Cattle | Central | 0 | 0 | 0 | 0 | 0 | 0 |
| 2561 | Cattle | Central | 0 | 0 | 0 | 0 | 0 | 0 |
| 2562 | Cattle | Central | 1 | 0 | 1 | 1 | 0 | 1 |
| 2563 | Cattle | Central | 0 | 0 | 0 | 0 | 0 | 0 |
| 2564 | Cattle | Central | 0 | 0 | 0 | 1 | 0 | 1 |
| 2565 | Cattle | Central | 0 | 0 | 0 | 1 | 0 | 1 |
| 2566 | Cattle | Central | 1 | 0 | 1 | 1 | 0 | 1 |
| 2567 | Cattle | Central | 0 | 0 | 0 | 1 | 0 | 1 |
| 2568 | Cattle | Central | 0 | 0 | 0 | 1 | 0 | 1 |
| 2569 | Cattle | Central | 0 | 0 | 0 | 0 | 0 | 0 |
| 2570 | Cattle | Central | 0 | 0 | 0 | 0 | 0 | 0 |
| 2571 | Cattle | Central | 0 | 0 | 0 | 0 | 0 | 0 |
| 2572 | Cattle | Central | 1 | 0 | 1 | 1 | 0 | 1 |
| 2573 | Cattle | Central | 0 | 0 | 1 | 0 | 0 | 1 |
| 2574 | Cattle | Central | 0 | 0 | 0 | 0 | 0 | 0 |
| 2575 | Cattle | Central | 0 | 0 | 0 | 0 | 0 | 0 |
| 2576 | Cattle | Central | 0 | 0 | 0 | 0 | 0 | 0 |
| 2577 | Cattle | Central | 0 | 0 | 0 | 0 | 0 | 0 |
| 2578 | Cattle | Central | 0 | 0 | 0 | 0 | 0 | 0 |
| 2579 | Cattle | Central | 0 | 0 | 1 | 0 | 0 | 1 |
| 2580 | Cattle | Central | 0 | 0 | 0 | 0 | 0 | 0 |
| 2581 | Cattle | Central | 0 | 0 | 0 | 0 | 0 | 0 |
| 2582 | Cattle | Central | 0 | 0 | 0 | 0 | 0 | 0 |
| 2583 | Cattle | Central | 0 | 0 | 0 | 0 | 0 | 0 |
| 2584 | Cattle | Central | 0 | 0 | 0 | 0 | 0 | 0 |
| 2585 | Cattle | Central | 0 | 0 | 0 | 0 | 0 | 0 |
| 2586 | Cattle | Central | 0 | 0 | 0 | 0 | 0 | 0 |
| 2587 | Cattle | Central | 0 | 0 | 0 | 0 | 0 | 0 |
| 2588 | Cattle | Central | 0 | 0 | 1 | 0 | 0 | 1 |
| 2589 | Cattle | Central | 0 | 0 | 1 | 0 | 0 | 1 |
| 2590 | Cattle | Central | 0 | 0 | 1 | 0 | 0 | 1 |
| 2591 | Cattle | Central | 0 | 0 | 0 | 0 | 0 | 0 |

|      |        |         |   |   |   |   |   |   |
|------|--------|---------|---|---|---|---|---|---|
| 2592 | Cattle | Central | 0 | 0 | 1 | 0 | 0 | 1 |
| 2593 | Cattle | Central | 0 | 0 | 1 | 0 | 0 | 1 |
| 2594 | Cattle | Central | 0 | 0 | 0 | 0 | 0 | 0 |
| 2595 | Cattle | Central | 0 | 0 | 0 | 0 | 0 | 0 |
| 2596 | Cattle | Central | 0 | 0 | 0 | 0 | 0 | 0 |
| 2597 | Cattle | Central | 0 | 0 | 0 | 0 | 0 | 0 |
| 2598 | Cattle | Central | 0 | 0 | 0 | 0 | 0 | 0 |
| 2599 | Cattle | Central | 0 | 0 | 0 | 0 | 0 | 0 |
| 2600 | Cattle | Central | 0 | 0 | 0 | 0 | 0 | 0 |
| 2601 | Cattle | Central | 0 | 0 | 0 | 0 | 0 | 0 |
| 2602 | Cattle | Central | 0 | 0 | 0 | 0 | 0 | 0 |
| 2603 | Cattle | Central | 0 | 0 | 0 | 0 | 0 | 0 |
| 2604 | Cattle | Central | 0 | 0 | 0 | 0 | 0 | 0 |
| 2605 | Cattle | Central | 0 | 0 | 0 | 0 | 0 | 0 |
| 2606 | Cattle | Central | 0 | 0 | 0 | 0 | 0 | 0 |
| 2607 | Cattle | Central | 0 | 0 | 0 | 0 | 0 | 0 |
| 2608 | Cattle | Central | 0 | 0 | 1 | 0 | 0 | 1 |
| 2609 | Cattle | Central | 0 | 0 | 1 | 0 | 0 | 1 |
| 2610 | Cattle | Central | 0 | 0 | 0 | 0 | 0 | 0 |
| 2611 | Cattle | Central | 0 | 0 | 0 | 1 | 0 | 1 |
| 2612 | Cattle | Central | 0 | 0 | 0 | 1 | 0 | 1 |
| 2613 | Cattle | Central | 0 | 0 | 0 | 1 | 0 | 1 |
| 2614 | Cattle | Central | 0 | 0 | 1 | 1 | 0 | 1 |
| 2615 | Cattle | Central | 0 | 0 | 1 | 1 | 0 | 1 |
| 2616 | Cattle | Central | 0 | 0 | 0 | 1 | 0 | 1 |
| 2617 | Cattle | Central | 0 | 0 | 0 | 0 | 0 | 0 |
| 2618 | Cattle | Central | 0 | 0 | 0 | 1 | 0 | 1 |
| 2619 | Cattle | Central | 0 | 0 | 1 | 1 | 0 | 1 |
| 2620 | Cattle | Central | 0 | 0 | 1 | 1 | 0 | 1 |
| 2621 | Cattle | Central | 0 | 0 | 0 | 1 | 1 | 1 |
| 2622 | Cattle | Central | 0 | 0 | 1 | 1 | 0 | 1 |
| 2623 | Cattle | Central | 0 | 0 | 0 | 1 | 1 | 1 |
| 2624 | Cattle | Central | 0 | 0 | 0 | 1 | 0 | 1 |
| 2625 | Cattle | Central | 0 | 0 | 1 | 1 | 0 | 1 |
| 2626 | Cattle | Central | 0 | 0 | 0 | 1 | 0 | 1 |
| 2627 | Cattle | Central | 0 | 0 | 0 | 1 | 0 | 1 |
| 2628 | Cattle | Central | 0 | 0 | 0 | 1 | 0 | 1 |
| 2629 | Cattle | Central | 0 | 0 | 0 | 1 | 0 | 1 |
| 2630 | Cattle | Central | 0 | 0 | 0 | 1 | 0 | 1 |
| 2631 | Cattle | Central | 0 | 0 | 0 | 1 | 0 | 1 |
| 2632 | Cattle | Central | 0 | 0 | 1 | 1 | 1 | 1 |
| 2633 | Cattle | Central | 0 | 0 | 0 | 1 | 0 | 1 |
| 2634 | Cattle | Central | 0 | 0 | 1 | 1 | 0 | 1 |
| 2635 | Cattle | Central | 0 | 0 | 0 | 1 | 1 | 1 |
| 2636 | Cattle | Central | 0 | 0 | 0 | 1 | 1 | 1 |
| 2637 | Cattle | Central | 0 | 0 | 0 | 1 | 0 | 1 |
| 2638 | Cattle | Central | 0 | 0 | 1 | 1 | 1 | 1 |
| 2639 | Cattle | Central | 0 | 0 | 1 | 1 | 0 | 1 |

|      |        |         |   |   |   |   |   |   |
|------|--------|---------|---|---|---|---|---|---|
| 2640 | Cattle | Central | 0 | 0 | 1 | 1 | 0 | 1 |
| 2641 | Cattle | Central | 0 | 0 | 0 | 1 | 0 | 1 |
| 2642 | Cattle | Central | 0 | 0 | 0 | 1 | 0 | 1 |
| 2643 | Cattle | Central | 0 | 0 | 0 | 1 | 0 | 1 |
| 2644 | Cattle | Central | 0 | 0 | 0 | 1 | 0 | 1 |
| 2645 | Cattle | Central | 0 | 0 | 0 | 1 | 0 | 1 |
| 2646 | Cattle | Central | 0 | 0 | 0 | 1 | 0 | 1 |
| 2647 | Cattle | Central | 0 | 0 | 0 | 1 | 0 | 1 |
| 2648 | Cattle | Central | 0 | 0 | 0 | 1 | 0 | 1 |
| 2649 | Cattle | Central | 0 | 0 | 0 | 1 | 0 | 1 |
| 2650 | Cattle | Central | 0 | 0 | 1 | 1 | 0 | 1 |
| 2651 | Cattle | Central | 0 | 0 | 1 | 1 | 0 | 1 |
| 2652 | Cattle | Central | 0 | 0 | 0 | 1 | 0 | 1 |
| 2653 | Cattle | Central | 0 | 0 | 0 | 1 | 0 | 1 |
| 2654 | Cattle | Central | 0 | 0 | 0 | 1 | 0 | 1 |
| 2655 | Cattle | Central | 0 | 0 | 1 | 1 | 0 | 1 |
| 2656 | Cattle | Central | 0 | 0 | 0 | 1 | 0 | 1 |
| 2657 | Cattle | Central | 0 | 0 | 0 | 1 | 0 | 1 |
| 2658 | Cattle | Central | 0 | 0 | 0 | 1 | 0 | 1 |
| 2659 | Cattle | Central | 0 | 0 | 0 | 0 | 0 | 0 |
| 2660 | Cattle | Central | 0 | 0 | 0 | 1 | 0 | 1 |
| 2661 | Cattle | Central | 0 | 0 | 0 | 0 | 0 | 0 |
| 2662 | Cattle | Central | 0 | 0 | 0 | 0 | 0 | 0 |
| 2663 | Cattle | Central | 0 | 0 | 0 | 0 | 0 | 0 |
| 2664 | Cattle | Central | 0 | 0 | 0 | 0 | 0 | 0 |
| 2665 | Cattle | Central | 0 | 0 | 0 | 0 | 0 | 0 |
| 2666 | Cattle | Central | 0 | 0 | 0 | 0 | 0 | 0 |
| 2667 | Cattle | Central | 0 | 0 | 0 | 0 | 0 | 0 |
| 2668 | Cattle | Central | 0 | 0 | 0 | 0 | 0 | 0 |
| 2669 | Cattle | Central | 0 | 0 | 0 | 0 | 0 | 0 |
| 2670 | Cattle | Central | 0 | 0 | 0 | 0 | 0 | 0 |
| 2671 | Cattle | Central | 0 | 0 | 0 | 1 | 0 | 1 |
| 2672 | Cattle | Central | 0 | 0 | 0 | 0 | 0 | 0 |
| 2673 | Cattle | Central | 0 | 0 | 0 | 1 | 0 | 1 |
| 2674 | Cattle | Central | 0 | 0 | 0 | 0 | 0 | 0 |
| 2675 | Cattle | Central | 0 | 0 | 0 | 1 | 0 | 1 |
| 2676 | Cattle | Central | 0 | 0 | 0 | 1 | 0 | 1 |
| 2677 | Cattle | Central | 0 | 0 | 0 | 0 | 0 | 0 |
| 2678 | Cattle | Central | 0 | 0 | 0 | 1 | 1 | 1 |
| 2679 | Cattle | Central | 0 | 0 | 0 | 1 | 0 | 1 |
| 2680 | Cattle | Central | 0 | 0 | 0 | 1 | 0 | 1 |
| 2681 | Cattle | Central | 0 | 0 | 0 | 0 | 0 | 0 |
| 2682 | Cattle | Central | 0 | 0 | 0 | 1 | 0 | 1 |
| 2683 | Cattle | Central | 0 | 0 | 0 | 1 | 0 | 1 |
| 2684 | Cattle | Central | 0 | 0 | 0 | 1 | 0 | 1 |
| 2685 | Cattle | Central | 0 | 0 | 0 | 1 | 0 | 1 |
| 2686 | Cattle | Central | 0 | 0 | 1 | 1 | 0 | 1 |
| 2687 | Cattle | Central | 0 | 0 | 0 | 1 | 0 | 1 |



|      |        |              |   |   |   |   |   |   |
|------|--------|--------------|---|---|---|---|---|---|
| 2688 | Cattle | Central      | 0 | 0 | 0 | 1 | 0 | 1 |
| 2689 | Cattle | Central      | 0 | 0 | 1 | 1 | 0 | 1 |
| 2690 | Cattle | Central      | 0 | 0 | 0 | 1 | 0 | 1 |
| 2691 | Cattle | Central      | 0 | 1 | 0 | 1 | 0 | 1 |
| 2692 | Cattle | Central      | 0 | 0 | 0 | 1 | 0 | 1 |
| 2693 | Cattle | Central      | 0 | 0 | 0 | 1 | 0 | 1 |
| 2694 | Cattle | Central      | 0 | 0 | 1 | 1 | 0 | 1 |
| 2695 | Cattle | Central      | 0 | 0 | 0 | 1 | 0 | 1 |
| 2696 | Cattle | Central      | 0 | 0 | 0 | 0 | 0 | 0 |
| 2697 | Cattle | Central      | 0 | 0 | 0 | 1 | 0 | 1 |
| 2698 | Cattle | Central      | 0 | 0 | 0 | 1 | 0 | 1 |
| 2699 | Cattle | Central      | 0 | 0 | 0 | 1 | 0 | 1 |
| 2700 | Cattle | Central      | 0 | 0 | 0 | 0 | 0 | 0 |
| 2701 | Cattle | Central      | 0 | 0 | 1 | 1 | 0 | 1 |
| 2702 | Cattle | Central      | 0 | 0 | 0 | 1 | 0 | 1 |
| 2703 | Cattle | Central      | 0 | 0 | 0 | 0 | 0 | 0 |
| 2704 | Cattle | Central      | 0 | 0 | 0 | 0 | 0 | 0 |
| 2705 | Cattle | Central      | 0 | 0 | 0 | 0 | 0 | 0 |
| 2706 | Cattle | Central      | 0 | 0 | 0 | 1 | 0 | 1 |
| 2707 | Cattle | Central      | 0 | 0 | 0 | 0 | 0 | 0 |
| 2708 | Cattle | Central      | 0 | 0 | 0 | 0 | 0 | 0 |
| 2709 | Cattle | Central      | 0 | 0 | 0 | 0 | 0 | 0 |
| 2710 | Cattle | Central      | 0 | 0 | 0 | 0 | 0 | 0 |
| 2711 | Cattle | Central      | 0 | 0 | 1 | 1 | 0 | 1 |
| 2712 | Cattle | Central      | 0 | 0 | 0 | 1 | 0 | 1 |
| 2713 | Cattle | Central      | 0 | 0 | 0 | 1 | 0 | 1 |
| 2714 | Cattle | Central      | 0 | 0 | 0 | 1 | 0 | 1 |
| 2715 | Cattle | Central      | 0 | 0 | 0 | 1 | 0 | 1 |
| 2716 | Cattle | Central      | 0 | 0 | 0 | 0 | 0 | 0 |
| 2717 | Cattle | Central      | 0 | 0 | 0 | 1 | 0 | 1 |
| 2718 | Cattle | Central      | 0 | 0 | 0 | 0 | 0 | 0 |
| 2719 | Cattle | Central      | 0 | 0 | 0 | 0 | 0 | 0 |
| 2720 | Cattle | Central      | 0 | 0 | 0 | 0 | 0 | 0 |
| 2721 | Cattle | Central      | 0 | 0 | 0 | 1 | 0 | 1 |
| 2722 | Cattle | Central      | 0 | 0 | 0 | 1 | 0 | 1 |
| 2723 | Cattle | Central      | 0 | 0 | 0 | 1 | 0 | 1 |
| 2724 | Cattle | Northeastern | 0 | 0 | 1 | 1 | 0 | 1 |
| 2725 | Cattle | Northeastern | 0 | 0 | 0 | 1 | 0 | 1 |
| 2726 | Cattle | Northeastern | 0 | 0 | 0 | 1 | 0 | 1 |
| 2727 | Cattle | Northeastern | 0 | 0 | 0 | 0 | 0 | 0 |
| 2728 | Cattle | Northeastern | 0 | 0 | 0 | 0 | 0 | 0 |
| 2729 | Cattle | Northeastern | 0 | 0 | 0 | 0 | 0 | 0 |
| 2730 | Cattle | Eastern      | 0 | 0 | 0 | 0 | 0 | 0 |
| 2731 | Cattle | Eastern      | 0 | 0 | 0 | 0 | 0 | 1 |
| 2732 | Cattle | Eastern      | 0 | 0 | 0 | 1 | 0 | 1 |
| 2733 | Cattle | Eastern      | 0 | 0 | 0 | 0 | 0 | 0 |
| 2734 | Cattle | Eastern      | 0 | 0 | 0 | 0 | 0 | 1 |
| 2735 | Cattle | Central      | 0 | 0 | 0 | 1 | 0 | 1 |

|      |        |          |   |   |   |   |   |   |
|------|--------|----------|---|---|---|---|---|---|
| 2736 | Cattle | Central  | 0 | 0 | 0 | 0 | 0 | 0 |
| 2737 | Cattle | Central  | 0 | 0 | 0 | 1 | 0 | 1 |
| 2738 | Cattle | Central  | 0 | 1 | 0 | 1 | 0 | 1 |
| 2739 | Cattle | Central  | 0 | 0 | 0 | 0 | 0 | 0 |
| 2740 | Cattle | Central  | 0 | 0 | 0 | 1 | 0 | 1 |
| 2741 | Cattle | Central  | 0 | 1 | 0 | 0 | 0 | 1 |
| 2742 | Cattle | Central  | 0 | 0 | 0 | 0 | 0 | 0 |
| 2743 | Cattle | Central  | 0 | 0 | 0 | 1 | 0 | 1 |
| 2744 | Cattle | Central  | 0 | 0 | 0 | 0 | 0 | 0 |
| 2745 | Cattle | Central  | 0 | 0 | 0 | 0 | 0 | 0 |
| 2746 | Cattle | Central  | 0 | 0 | 0 | 0 | 0 | 0 |
| 2747 | Cattle | Central  | 0 | 0 | 0 | 0 | 0 | 0 |
| 2748 | Cattle | Central  | 0 | 0 | 0 | 1 | 0 | 1 |
| 2749 | Cattle | Central  | 0 | 0 | 0 | 1 | 0 | 1 |
| 2750 | Cattle | Central  | 0 | 0 | 0 | 1 | 0 | 1 |
| 2751 | Cattle | Central  | 0 | 1 | 0 | 0 | 0 | 1 |
| 2752 | Cattle | Central  | 0 | 0 | 0 | 0 | 0 | 0 |
| 2753 | Cattle | Central  | 0 | 0 | 0 | 0 | 0 | 0 |
| 2754 | Cattle | Central  | 0 | 0 | 0 | 0 | 0 | 0 |
| 2755 | Cattle | Central  | 0 | 0 | 0 | 0 | 0 | 0 |
| 2756 | Cattle | Central  | 0 | 0 | 0 | 0 | 0 | 0 |
| 2757 | Cattle | Central  | 0 | 0 | 0 | 0 | 0 | 0 |
| 2758 | Cattle | Central  | 0 | 0 | 0 | 0 | 0 | 0 |
| 2759 | Cattle | Central  | 0 | 0 | 0 | 0 | 0 | 0 |
| 2760 | Cattle | Central  | 0 | 1 | 0 | 1 | 0 | 1 |
| 2761 | Cattle | Central  | 0 | 0 | 0 | 0 | 0 | 0 |
| 2762 | Cattle | Central  | 0 | 0 | 0 | 0 | 0 | 0 |
| 2763 | Cattle | Central  | 0 | 0 | 0 | 0 | 0 | 0 |
| 2764 | Cattle | Central  | 0 | 0 | 0 | 1 | 0 | 1 |
| 2765 | Cattle | Central  | 0 | 0 | 0 | 0 | 0 | 0 |
| 2766 | Cattle | Central  | 0 | 0 | 0 | 0 | 0 | 0 |
| 2767 | Cattle | Central  | 0 | 0 | 0 | 0 | 0 | 0 |
| 2768 | Cattle | Central  | 0 | 0 | 0 | 0 | 0 | 0 |
| 2769 | Cattle | Central  | 0 | 0 | 0 | 0 | 0 | 0 |
| 2770 | Cattle | Central  | 0 | 0 | 0 | 0 | 0 | 0 |
| 2771 | Cattle | Central  | 0 | 0 | 0 | 0 | 0 | 0 |
| 2772 | Cattle | Central  | 0 | 0 | 0 | 0 | 0 | 0 |
| 2773 | Cattle | Southern | 0 | 0 | 0 | 0 | 0 | 0 |
| 2774 | Cattle | Southern | 0 | 0 | 0 | 1 | 0 | 1 |
| 2775 | Cattle | Southern | 0 | 0 | 0 | 0 | 0 | 0 |
| 2776 | Cattle | Southern | 0 | 0 | 0 | 0 | 0 | 0 |
| 2777 | Cattle | Southern | 0 | 0 | 0 | 0 | 0 | 0 |
| 2778 | Cattle | Southern | 0 | 0 | 0 | 0 | 0 | 0 |
| 2779 | Cattle | Southern | 1 | 0 | 0 | 1 | 0 | 1 |
| 2780 | Cattle | Southern | 0 | 0 | 0 | 1 | 0 | 1 |
| 2781 | Cattle | Southern | 0 | 0 | 0 | 1 | 0 | 1 |
| 2782 | Cattle | Southern | 0 | 0 | 0 | 1 | 0 | 1 |
| 2783 | Cattle | Southern | 0 | 0 | 0 | 0 | 0 | 0 |

|      |        |          |   |   |   |   |   |   |
|------|--------|----------|---|---|---|---|---|---|
| 2784 | Cattle | Southern | 0 | 0 | 0 | 0 | 0 | 0 |
| 2785 | Cattle | Southern | 0 | 0 | 0 | 1 | 0 | 1 |
| 2786 | Cattle | Southern | 0 | 0 | 0 | 0 | 0 | 0 |
| 2787 | Cattle | Southern | 0 | 0 | 0 | 0 | 0 | 0 |
| 2788 | Cattle | Southern | 0 | 0 | 0 | 1 | 0 | 1 |
| 2789 | Cattle | Southern | 0 | 0 | 0 | 0 | 0 | 0 |
| 2790 | Cattle | Southern | 0 | 0 | 0 | 0 | 0 | 0 |
| 2791 | Cattle | Southern | 0 | 0 | 0 | 1 | 0 | 1 |
| 2792 | Cattle | Southern | 0 | 0 | 0 | 0 | 0 | 0 |
| 2793 | Cattle | Southern | 0 | 0 | 0 | 1 | 0 | 1 |
| 2794 | Cattle | Southern | 0 | 0 | 0 | 0 | 0 | 0 |
| 2795 | Cattle | Southern | 0 | 0 | 0 | 0 | 0 | 0 |
| 2796 | Cattle | Southern | 0 | 0 | 0 | 1 | 0 | 1 |
| 2797 | Cattle | Southern | 0 | 0 | 0 | 0 | 0 | 1 |
| 2798 | Cattle | Southern | 0 | 0 | 0 | 1 | 0 | 1 |
| 2799 | Cattle | Southern | 0 | 0 | 0 | 0 | 0 | 0 |
| 2800 | Cattle | Southern | 0 | 0 | 0 | 0 | 0 | 0 |
| 2801 | Cattle | Southern | 0 | 0 | 0 | 0 | 0 | 0 |
| 2802 | Cattle | Southern | 0 | 0 | 0 | 0 | 0 | 0 |
| 2803 | Cattle | Central  | 0 | 0 | 0 | 1 | 0 | 1 |
| 2804 | Cattle | Central  | 0 | 0 | 0 | 0 | 0 | 0 |
| 2805 | Cattle | Central  | 0 | 0 | 0 | 1 | 0 | 1 |
| 2806 | Cattle | Central  | 0 | 0 | 0 | 1 | 0 | 1 |
| 2807 | Cattle | Central  | 0 | 0 | 0 | 1 | 0 | 1 |
| 2808 | Cattle | Central  | 0 | 0 | 0 | 1 | 0 | 1 |
| 2809 | Cattle | Central  | 0 | 0 | 0 | 1 | 1 | 1 |
| 2810 | Cattle | Central  | 0 | 0 | 0 | 0 | 0 | 0 |
| 2811 | Cattle | Central  | 0 | 0 | 0 | 1 | 0 | 1 |
| 2812 | Cattle | Central  | 0 | 0 | 0 | 1 | 0 | 1 |
| 2813 | Cattle | Central  | 0 | 0 | 0 | 1 | 0 | 1 |
| 2814 | Cattle | Central  | 0 | 0 | 0 | 1 | 0 | 1 |
| 2815 | Cattle | Central  | 0 | 0 | 0 | 1 | 0 | 1 |
| 2816 | Cattle | Central  | 0 | 0 | 0 | 1 | 0 | 1 |
| 2817 | Cattle | Central  | 0 | 0 | 0 | 1 | 1 | 1 |
| 2818 | Cattle | Central  | 0 | 0 | 0 | 1 | 1 | 1 |
| 2819 | Cattle | Central  | 0 | 0 | 0 | 1 | 1 | 1 |
| 2820 | Cattle | Central  | 0 | 0 | 0 | 1 | 1 | 1 |
| 2821 | Cattle | Central  | 0 | 0 | 1 | 1 | 1 | 1 |
| 2822 | Cattle | Central  | 0 | 0 | 1 | 1 | 1 | 1 |
| 2823 | Cattle | Central  | 0 | 0 | 1 | 1 | 1 | 1 |
| 2824 | Cattle | Central  | 0 | 0 | 0 | 0 | 1 | 1 |
| 2825 | Cattle | Central  | 0 | 0 | 1 | 1 | 0 | 1 |
| 2826 | Cattle | Central  | 0 | 0 | 1 | 1 | 0 | 1 |
| 2827 | Cattle | Central  | 0 | 0 | 1 | 1 | 0 | 1 |
| 2828 | Cattle | Central  | 0 | 0 | 1 | 1 | 0 | 1 |
| 2829 | Cattle | Central  | 0 | 0 | 1 | 1 | 0 | 1 |
| 2830 | Cattle | Central  | 0 | 0 | 1 | 1 | 1 | 1 |
| 2831 | Cattle | Central  | 0 | 0 | 1 | 1 | 0 | 1 |

|      |        |          |   |   |   |   |   |   |
|------|--------|----------|---|---|---|---|---|---|
| 2832 | Cattle | Central  | 0 | 0 | 1 | 1 | 0 | 1 |
| 2833 | Cattle | Central  | 0 | 0 | 1 | 1 | 0 | 1 |
| 2834 | Cattle | Central  | 0 | 0 | 1 | 1 | 1 | 1 |
| 2835 | Cattle | Central  | 0 | 1 | 1 | 1 | 0 | 1 |
| 2836 | Cattle | Central  | 0 | 0 | 1 | 1 | 0 | 1 |
| 2837 | Cattle | Central  | 0 | 0 | 1 | 1 | 0 | 1 |
| 2838 | Cattle | Central  | 0 | 0 | 1 | 1 | 0 | 1 |
| 2839 | Cattle | Central  | 0 | 0 | 1 | 1 | 0 | 1 |
| 2840 | Cattle | Central  | 0 | 0 | 1 | 0 | 0 | 1 |
| 2841 | Cattle | Central  | 0 | 0 | 0 | 1 | 0 | 1 |
| 2842 | Cattle | Central  | 0 | 0 | 1 | 1 | 0 | 1 |
| 2843 | Cattle | Central  | 0 | 0 | 1 | 1 | 0 | 1 |
| 2844 | Cattle | Central  | 0 | 0 | 1 | 1 | 0 | 1 |
| 2845 | Cattle | Southern | 0 | 0 | 0 | 0 | 0 | 0 |
| 2846 | Cattle | Southern | 0 | 0 | 0 | 0 | 0 | 0 |
| 2847 | Cattle | Northern | 0 | 0 | 0 | 0 | 0 | 0 |
| 2848 | Cattle | Northern | 0 | 0 | 0 | 0 | 0 | 1 |
| 2849 | Cattle | Northern | 0 | 0 | 0 | 0 | 0 | 0 |
| 2850 | Cattle | Northern | 0 | 0 | 0 | 1 | 0 | 1 |
| 2851 | Cattle | Northern | 0 | 0 | 0 | 0 | 0 | 0 |
| 2852 | Cattle | Northern | 0 | 0 | 0 | 0 | 0 | 0 |
| 2853 | Cattle | Northern | 0 | 0 | 0 | 0 | 0 | 0 |
| 2854 | Cattle | Northern | 0 | 0 | 0 | 0 | 0 | 0 |
| 2855 | Cattle | Northern | 0 | 0 | 0 | 0 | 0 | 0 |
| 2856 | Cattle | Northern | 0 | 0 | 0 | 0 | 0 | 0 |
| 2857 | Cattle | Northern | 0 | 0 | 0 | 0 | 0 | 0 |
| 2858 | Cattle | Northern | 0 | 0 | 0 | 0 | 0 | 0 |
| 2859 | Cattle | Northern | 0 | 0 | 0 | 0 | 0 | 0 |
| 2860 | Cattle | Northern | 0 | 0 | 0 | 0 | 0 | 0 |
| 2861 | Cattle | Northern | 0 | 0 | 0 | 0 | 0 | 0 |
| 2862 | Cattle | Northern | 0 | 0 | 0 | 0 | 0 | 0 |
| 2863 | Cattle | Northern | 0 | 0 | 0 | 0 | 0 | 0 |
| 2864 | Cattle | Northern | 0 | 0 | 0 | 0 | 0 | 0 |
| 2865 | Cattle | Northern | 0 | 0 | 0 | 0 | 0 | 0 |
| 2866 | Cattle | Northern | 0 | 0 | 0 | 0 | 0 | 0 |
| 2867 | Cattle | Northern | 0 | 0 | 0 | 0 | 0 | 0 |
| 2868 | Cattle | Northern | 0 | 0 | 0 | 0 | 0 | 0 |
| 2869 | Cattle | Northern | 0 | 0 | 0 | 0 | 0 | 0 |
| 2870 | Cattle | Northern | 0 | 0 | 0 | 0 | 0 | 0 |
| 2871 | Cattle | Northern | 0 | 0 | 0 | 0 | 0 | 0 |
| 2872 | Cattle | Northern | 0 | 0 | 0 | 0 | 0 | 0 |
| 2873 | Cattle | Northern | 0 | 0 | 0 | 0 | 0 | 0 |
| 2874 | Cattle | Northern | 0 | 0 | 0 | 0 | 0 | 0 |
| 2875 | Cattle | Northern | 0 | 0 | 0 | 0 | 0 | 0 |
| 2876 | Cattle | Northern | 0 | 0 | 0 | 0 | 0 | 0 |
| 2877 | Cattle | Northern | 0 | 0 | 0 | 0 | 0 | 0 |
| 2878 | Cattle | Northern | 0 | 0 | 0 | 0 | 0 | 0 |
| 2879 | Cattle | Northern | 0 | 0 | 0 | 0 | 0 | 0 |

|      |        |          |   |   |   |   |   |   |
|------|--------|----------|---|---|---|---|---|---|
| 2880 | Cattle | Northern | 0 | 0 | 0 | 0 | 0 | 0 |
| 2881 | Cattle | Northern | 0 | 0 | 0 | 0 | 0 | 0 |
| 2882 | Cattle | Northern | 0 | 0 | 0 | 0 | 0 | 0 |
| 2883 | Cattle | Northern | 0 | 0 | 0 | 0 | 0 | 0 |
| 2884 | Cattle | Northern | 0 | 0 | 0 | 0 | 0 | 0 |
| 2885 | Cattle | Northern | 0 | 0 | 0 | 0 | 0 | 0 |
| 2886 | Cattle | Northern | 0 | 0 | 0 | 0 | 0 | 0 |
| 2887 | Cattle | Northern | 0 | 0 | 0 | 0 | 0 | 0 |
| 2888 | Cattle | Northern | 0 | 0 | 0 | 0 | 0 | 0 |
| 2889 | Cattle | Northern | 0 | 0 | 0 | 0 | 0 | 0 |
| 2890 | Cattle | Northern | 0 | 0 | 0 | 0 | 0 | 0 |
| 2891 | Cattle | Northern | 0 | 0 | 0 | 0 | 0 | 0 |
| 2892 | Cattle | Northern | 0 | 0 | 0 | 0 | 0 | 0 |
| 2893 | Cattle | Northern | 0 | 0 | 0 | 0 | 0 | 0 |
| 2894 | Cattle | Northern | 0 | 0 | 0 | 0 | 0 | 0 |
| 2895 | Cattle | Northern | 0 | 0 | 0 | 0 | 0 | 0 |
| 2896 | Cattle | Northern | 0 | 0 | 0 | 0 | 0 | 0 |
| 2897 | Cattle | Northern | 0 | 0 | 0 | 0 | 0 | 0 |
| 2898 | Cattle | Northern | 0 | 0 | 1 | 1 | 0 | 1 |
| 2899 | Cattle | Northern | 0 | 0 | 0 | 0 | 0 | 0 |
| 2900 | Cattle | Northern | 0 | 0 | 0 | 0 | 0 | 0 |
| 2901 | Cattle | Northern | 0 | 0 | 0 | 0 | 0 | 0 |
| 2902 | Cattle | Northern | 0 | 0 | 0 | 0 | 0 | 0 |
| 2903 | Cattle | Northern | 0 | 0 | 0 | 0 | 0 | 0 |
| 2904 | Cattle | Northern | 0 | 0 | 0 | 0 | 0 | 0 |
| 2905 | Cattle | Northern | 0 | 0 | 0 | 0 | 0 | 0 |
| 2906 | Cattle | Northern | 0 | 0 | 0 | 0 | 0 | 0 |
| 2907 | Cattle | Northern | 0 | 0 | 0 | 0 | 0 | 0 |
| 2908 | Cattle | Northern | 0 | 0 | 0 | 0 | 0 | 0 |
| 2909 | Cattle | Northern | 0 | 0 | 0 | 0 | 0 | 0 |
| 2910 | Cattle | Northern | 0 | 0 | 0 | 0 | 0 | 0 |
| 2911 | Cattle | Northern | 0 | 0 | 0 | 0 | 0 | 0 |
| 2912 | Cattle | Northern | 0 | 0 | 0 | 0 | 0 | 0 |
| 2913 | Cattle | Northern | 0 | 0 | 0 | 0 | 0 | 0 |
| 2914 | Cattle | Northern | 0 | 0 | 0 | 0 | 0 | 0 |
| 2915 | Cattle | Northern | 0 | 0 | 0 | 0 | 0 | 0 |
| 2916 | Cattle | Northern | 0 | 0 | 0 | 0 | 0 | 0 |
| 2917 | Cattle | Northern | 0 | 0 | 0 | 0 | 0 | 0 |
| 2918 | Cattle | Northern | 0 | 0 | 0 | 0 | 0 | 0 |
| 2919 | Cattle | Northern | 0 | 0 | 0 | 0 | 0 | 0 |
| 2920 | Cattle | Northern | 0 | 0 | 0 | 0 | 0 | 0 |
| 2921 | Cattle | Northern | 0 | 0 | 0 | 0 | 0 | 0 |
| 2922 | Cattle | Northern | 0 | 0 | 0 | 0 | 0 | 0 |
| 2923 | Cattle | Northern | 0 | 0 | 0 | 0 | 0 | 0 |
| 2924 | Cattle | Northern | 0 | 0 | 0 | 0 | 0 | 0 |
| 2925 | Cattle | Northern | 0 | 0 | 0 | 0 | 0 | 0 |
| 2926 | Cattle | Northern | 0 | 0 | 0 | 0 | 0 | 0 |
| 2927 | Cattle | Northern | 0 | 0 | 0 | 0 | 0 | 0 |

|      |        |          |   |   |   |   |   |   |
|------|--------|----------|---|---|---|---|---|---|
| 2928 | Cattle | Northern | 0 | 0 | 0 | 0 | 0 | 0 |
| 2929 | Cattle | Northern | 0 | 0 | 0 | 0 | 0 | 0 |
| 2930 | Cattle | Northern | 0 | 0 | 0 | 0 | 0 | 0 |
| 2931 | Cattle | Northern | 0 | 0 | 0 | 0 | 0 | 0 |
| 2932 | Cattle | Northern | 0 | 0 | 0 | 0 | 0 | 0 |
| 2933 | Cattle | Northern | 0 | 0 | 0 | 0 | 0 | 0 |
| 2934 | Cattle | Northern | 0 | 0 | 0 | 0 | 0 | 0 |
| 2935 | Cattle | Northern | 0 | 0 | 0 | 0 | 0 | 0 |
| 2936 | Cattle | Northern | 0 | 0 | 0 | 0 | 0 | 0 |
| 2937 | Cattle | Northern | 0 | 0 | 0 | 0 | 0 | 0 |
| 2938 | Cattle | Northern | 0 | 0 | 0 | 1 | 0 | 1 |
| 2939 | Cattle | Northern | 0 | 0 | 0 | 0 | 0 | 0 |
| 2940 | Cattle | Northern | 0 | 0 | 0 | 0 | 0 | 0 |
| 2941 | Cattle | Northern | 0 | 0 | 0 | 0 | 0 | 0 |
| 2942 | Cattle | Northern | 0 | 0 | 0 | 0 | 0 | 0 |
| 2943 | Cattle | Northern | 0 | 0 | 0 | 0 | 0 | 0 |
| 2944 | Cattle | Northern | 0 | 0 | 0 | 0 | 0 | 0 |
| 2945 | Cattle | Northern | 0 | 0 | 0 | 0 | 0 | 0 |
| 2946 | Cattle | Northern | 0 | 0 | 0 | 0 | 0 | 0 |
| 2947 | Cattle | Northern | 0 | 0 | 0 | 0 | 0 | 0 |
| 2948 | Cattle | Northern | 0 | 0 | 0 | 0 | 0 | 0 |
| 2949 | Cattle | Northern | 0 | 0 | 0 | 0 | 0 | 0 |
| 2950 | Cattle | Northern | 0 | 0 | 0 | 0 | 0 | 0 |
| 2951 | Cattle | Northern | 0 | 0 | 0 | 0 | 0 | 0 |
| 2952 | Cattle | Northern | 0 | 0 | 0 | 0 | 0 | 0 |
| 2953 | Cattle | Northern | 0 | 0 | 0 | 0 | 0 | 0 |
| 2954 | Cattle | Northern | 0 | 0 | 0 | 0 | 0 | 0 |
| 2955 | Cattle | Northern | 0 | 0 | 0 | 0 | 0 | 0 |
| 2956 | Cattle | Northern | 0 | 0 | 0 | 0 | 0 | 0 |
| 2957 | Cattle | Northern | 0 | 0 | 0 | 0 | 0 | 0 |
| 2958 | Cattle | Northern | 0 | 0 | 0 | 0 | 0 | 0 |
| 2959 | Cattle | Northern | 0 | 0 | 0 | 0 | 0 | 0 |
| 2960 | Cattle | Northern | 0 | 0 | 0 | 0 | 0 | 0 |
| 2961 | Cattle | Northern | 0 | 0 | 0 | 0 | 0 | 0 |
| 2962 | Cattle | Northern | 0 | 0 | 0 | 0 | 0 | 0 |
| 2963 | Cattle | Northern | 0 | 0 | 0 | 1 | 0 | 1 |
| 2964 | Cattle | Northern | 0 | 0 | 0 | 0 | 0 | 0 |
| 2965 | Cattle | Northern | 0 | 0 | 0 | 0 | 0 | 0 |
| 2966 | Cattle | Northern | 0 | 0 | 0 | 0 | 0 | 0 |
| 2967 | Cattle | Northern | 0 | 0 | 0 | 0 | 0 | 0 |
| 2968 | Cattle | Northern | 0 | 0 | 0 | 0 | 0 | 0 |
| 2969 | Cattle | Northern | 0 | 0 | 0 | 0 | 0 | 0 |
| 2970 | Cattle | Northern | 0 | 0 | 0 | 0 | 0 | 0 |
| 2971 | Cattle | Northern | 0 | 0 | 0 | 0 | 0 | 0 |
| 2972 | Cattle | Northern | 0 | 0 | 0 | 0 | 0 | 0 |
| 2973 | Cattle | Northern | 0 | 0 | 0 | 0 | 0 | 0 |
| 2974 | Cattle | Northern | 0 | 0 | 0 | 0 | 0 | 0 |
| 2975 | Cattle | Northern | 0 | 0 | 0 | 0 | 0 | 0 |

|      |        |          |   |   |   |   |   |   |
|------|--------|----------|---|---|---|---|---|---|
| 2976 | Cattle | Northern | 0 | 0 | 0 | 0 | 0 | 0 |
| 2977 | Cattle | Northern | 0 | 0 | 0 | 0 | 0 | 0 |
| 2978 | Cattle | Northern | 0 | 0 | 0 | 0 | 0 | 0 |
| 2979 | Cattle | Northern | 0 | 0 | 0 | 0 | 0 | 0 |
| 2980 | Cattle | Northern | 0 | 0 | 0 | 0 | 0 | 0 |
| 2981 | Cattle | Northern | 0 | 0 | 0 | 0 | 0 | 0 |
| 2982 | Cattle | Northern | 0 | 0 | 0 | 0 | 0 | 0 |
| 2983 | Cattle | Northern | 0 | 0 | 0 | 0 | 0 | 0 |
| 2984 | Cattle | Northern | 0 | 0 | 0 | 0 | 0 | 0 |
| 2985 | Cattle | Northern | 0 | 0 | 0 | 0 | 0 | 0 |
| 2986 | Cattle | Northern | 0 | 0 | 0 | 0 | 0 | 0 |
| 2987 | Cattle | Northern | 0 | 0 | 0 | 0 | 0 | 0 |
| 2988 | Cattle | Northern | 0 | 0 | 0 | 0 | 0 | 0 |
| 2989 | Cattle | Northern | 0 | 0 | 0 | 0 | 0 | 0 |
| 2990 | Cattle | Northern | 0 | 0 | 0 | 0 | 0 | 0 |
| 2991 | Cattle | Northern | 0 | 0 | 0 | 0 | 0 | 0 |
| 2992 | Cattle | Northern | 0 | 0 | 0 | 0 | 0 | 0 |
| 2993 | Cattle | Northern | 0 | 0 | 0 | 0 | 0 | 0 |
| 2994 | Cattle | Central  | 0 | 0 | 0 | 0 | 0 | 0 |
| 2995 | Cattle | Central  | 0 | 0 | 0 | 0 | 0 | 0 |
| 2996 | Cattle | Central  | 0 | 0 | 0 | 0 | 0 | 0 |
| 2997 | Cattle | Central  | 0 | 0 | 0 | 0 | 0 | 0 |
| 2998 | Cattle | Central  | 0 | 0 | 0 | 0 | 0 | 0 |
| 2999 | Cattle | Central  | 0 | 0 | 0 | 0 | 0 | 0 |
| 3000 | Cattle | Central  | 0 | 0 | 0 | 1 | 0 | 1 |
| 3001 | Cattle | Central  | 0 | 0 | 0 | 1 | 0 | 1 |
| 3002 | Cattle | Central  | 0 | 0 | 0 | 0 | 0 | 0 |
| 3003 | Cattle | Central  | 0 | 0 | 0 | 0 | 0 | 0 |
| 3004 | Cattle | Central  | 0 | 0 | 0 | 0 | 0 | 0 |
| 3005 | Cattle | Central  | 0 | 0 | 0 | 0 | 0 | 0 |
| 3006 | Cattle | Central  | 0 | 0 | 0 | 0 | 0 | 0 |
| 3007 | Cattle | Central  | 0 | 0 | 0 | 0 | 0 | 0 |
| 3008 | Cattle | Central  | 0 | 0 | 0 | 0 | 0 | 0 |
| 3009 | Cattle | Central  | 0 | 0 | 0 | 1 | 0 | 1 |
| 3010 | Cattle | Central  | 0 | 0 | 0 | 0 | 0 | 0 |
| 3011 | Cattle | Central  | 0 | 0 | 0 | 0 | 0 | 0 |
| 3012 | Cattle | Central  | 0 | 0 | 0 | 0 | 0 | 0 |
| 3013 | Cattle | Central  | 0 | 0 | 0 | 0 | 0 | 0 |
| 3014 | Cattle | Central  | 0 | 0 | 0 | 0 | 0 | 0 |
| 3015 | Cattle | Central  | 0 | 0 | 0 | 0 | 0 | 0 |
| 3016 | Cattle | Central  | 0 | 0 | 0 | 0 | 0 | 0 |
| 3017 | Cattle | Central  | 0 | 0 | 0 | 0 | 0 | 0 |
| 3018 | Cattle | Central  | 0 | 0 | 0 | 0 | 0 | 0 |
| 3019 | Cattle | Central  | 0 | 0 | 0 | 0 | 0 | 0 |
| 3020 | Cattle | Central  | 0 | 0 | 0 | 0 | 0 | 0 |
| 3021 | Cattle | Central  | 0 | 0 | 0 | 0 | 0 | 0 |
| 3022 | Cattle | Central  | 0 | 0 | 0 | 0 | 0 | 0 |
| 3023 | Cattle | Central  | 0 | 0 | 0 | 0 | 0 | 0 |

|      |        |         |   |   |   |   |   |   |
|------|--------|---------|---|---|---|---|---|---|
| 3024 | Cattle | Central | 0 | 0 | 0 | 1 | 0 | 1 |
| 3025 | Cattle | Central | 0 | 0 | 0 | 0 | 0 | 0 |
| 3026 | Cattle | Central | 0 | 0 | 0 | 0 | 0 | 0 |
| 3027 | Cattle | Central | 0 | 0 | 0 | 0 | 0 | 0 |
| 3028 | Cattle | Central | 0 | 0 | 0 | 0 | 0 | 0 |
| 3029 | Cattle | Central | 0 | 0 | 1 | 0 | 0 | 1 |
| 3030 | Cattle | Central | 0 | 0 | 0 | 0 | 0 | 0 |
| 3031 | Cattle | Central | 0 | 0 | 0 | 0 | 0 | 0 |
| 3032 | Cattle | Central | 0 | 0 | 0 | 0 | 0 | 0 |
| 3033 | Cattle | Central | 0 | 0 | 0 | 0 | 0 | 0 |
| 3034 | Cattle | Central | 0 | 0 | 0 | 0 | 0 | 0 |
| 3035 | Cattle | Central | 0 | 0 | 0 | 0 | 0 | 0 |
| 3036 | Cattle | Central | 0 | 0 | 0 | 0 | 0 | 0 |
| 3037 | Cattle | Central | 0 | 0 | 0 | 0 | 0 | 0 |
| 3038 | Cattle | Central | 0 | 0 | 0 | 0 | 0 | 0 |
| 3039 | Cattle | Central | 0 | 0 | 0 | 0 | 0 | 0 |
| 3040 | Cattle | Central | 0 | 0 | 0 | 0 | 0 | 0 |
| 3041 | Cattle | Central | 0 | 0 | 0 | 0 | 0 | 0 |
| 3042 | Cattle | Central | 0 | 0 | 0 | 0 | 0 | 0 |
| 3043 | Cattle | Central | 0 | 0 | 0 | 0 | 0 | 0 |
| 3044 | Cattle | Central | 0 | 0 | 0 | 0 | 0 | 0 |
| 3045 | Cattle | Central | 0 | 0 | 0 | 0 | 0 | 0 |
| 3046 | Cattle | Central | 0 | 0 | 0 | 0 | 0 | 0 |
| 3047 | Cattle | Central | 0 | 0 | 0 | 0 | 0 | 0 |
| 3048 | Cattle | Central | 0 | 0 | 0 | 0 | 0 | 0 |
| 3049 | Cattle | Central | 0 | 0 | 0 | 0 | 0 | 0 |
| 3050 | Cattle | Central | 0 | 0 | 0 | 0 | 0 | 0 |
| 3051 | Cattle | Central | 0 | 0 | 0 | 0 | 0 | 0 |
| 3052 | Cattle | Central | 0 | 0 | 0 | 0 | 0 | 0 |
| 3053 | Cattle | Central | 0 | 0 | 0 | 0 | 0 | 0 |
| 3054 | Cattle | Central | 0 | 0 | 0 | 0 | 0 | 0 |
| 3055 | Cattle | Central | 0 | 0 | 0 | 0 | 0 | 0 |
| 3056 | Cattle | Central | 0 | 0 | 0 | 0 | 0 | 0 |
| 3057 | Cattle | Central | 0 | 0 | 0 | 0 | 0 | 0 |
| 3058 | Cattle | Central | 0 | 0 | 0 | 0 | 0 | 0 |
| 3059 | Cattle | Central | 0 | 0 | 0 | 0 | 0 | 0 |
| 3060 | Cattle | Central | 0 | 0 | 0 | 0 | 0 | 0 |
| 3061 | Cattle | Central | 0 | 0 | 0 | 0 | 0 | 0 |
| 3062 | Cattle | Central | 0 | 0 | 0 | 0 | 0 | 0 |
| 3063 | Cattle | Central | 0 | 0 | 0 | 0 | 0 | 0 |
| 3064 | Cattle | Central | 0 | 0 | 0 | 0 | 0 | 0 |
| 3065 | Cattle | Central | 0 | 0 | 0 | 0 | 0 | 0 |
| 3066 | Cattle | Central | 0 | 0 | 0 | 0 | 0 | 0 |
| 3067 | Cattle | Central | 0 | 0 | 0 | 0 | 0 | 0 |
| 3068 | Cattle | Central | 0 | 0 | 0 | 0 | 0 | 0 |
| 3069 | Cattle | Central | 0 | 0 | 0 | 0 | 0 | 0 |
| 3070 | Cattle | Central | 0 | 0 | 0 | 0 | 0 | 0 |
| 3071 | Cattle | Central | 0 | 0 | 0 | 0 | 0 | 0 |



|      |        |         |   |   |   |   |   |   |
|------|--------|---------|---|---|---|---|---|---|
| 3072 | Cattle | Central | 0 | 0 | 0 | 0 | 0 | 0 |
| 3073 | Cattle | Central | 0 | 0 | 0 | 0 | 0 | 0 |
| 3074 | Cattle | Central | 0 | 0 | 0 | 0 | 0 | 0 |
| 3075 | Cattle | Central | 0 | 0 | 0 | 0 | 0 | 0 |
| 3076 | Cattle | Central | 0 | 0 | 0 | 0 | 0 | 0 |
| 3077 | Cattle | Central | 0 | 0 | 0 | 0 | 0 | 0 |
| 3078 | Cattle | Central | 0 | 0 | 0 | 0 | 0 | 0 |
| 3079 | Cattle | Central | 0 | 0 | 0 | 0 | 0 | 0 |
| 3080 | Cattle | Central | 0 | 0 | 0 | 0 | 0 | 0 |
| 3081 | Cattle | Central | 0 | 0 | 0 | 0 | 0 | 0 |
| 3082 | Cattle | Central | 0 | 0 | 0 | 1 | 0 | 1 |
| 3083 | Cattle | Central | 0 | 0 | 0 | 0 | 0 | 0 |
| 3084 | Cattle | Central | 0 | 0 | 0 | 1 | 0 | 1 |
| 3085 | Cattle | Central | 0 | 1 | 0 | 0 | 0 | 1 |
| 3086 | Cattle | Central | 0 | 0 | 0 | 0 | 0 | 0 |
| 3087 | Cattle | Central | 0 | 0 | 0 | 0 | 0 | 0 |
| 3088 | Cattle | Central | 0 | 0 | 0 | 0 | 0 | 1 |
| 3089 | Cattle | Central | 0 | 0 | 0 | 0 | 0 | 0 |
| 3090 | Cattle | Central | 1 | 0 | 0 | 0 | 0 | 1 |
| 3091 | Cattle | Central | 0 | 0 | 0 | 0 | 0 | 0 |
| 3092 | Cattle | Central | 0 | 0 | 0 | 0 | 0 | 0 |
| 3093 | Cattle | Central | 0 | 0 | 0 | 0 | 0 | 0 |
| 3094 | Cattle | Central | 0 | 0 | 0 | 0 | 0 | 0 |
| 3095 | Cattle | Central | 0 | 0 | 0 | 0 | 0 | 0 |
| 3096 | Cattle | Central | 0 | 0 | 0 | 0 | 0 | 1 |
| 3097 | Cattle | Central | 0 | 0 | 0 | 0 | 0 | 0 |
| 3098 | Cattle | Central | 0 | 0 | 0 | 0 | 0 | 0 |
| 3099 | Cattle | Central | 0 | 0 | 0 | 0 | 0 | 0 |
| 3100 | Cattle | Central | 0 | 0 | 0 | 0 | 0 | 1 |
| 3101 | Cattle | Central | 0 | 0 | 0 | 0 | 0 | 0 |
| 3102 | Cattle | Central | 0 | 0 | 0 | 0 | 0 | 0 |
| 3103 | Cattle | Central | 0 | 0 | 0 | 0 | 0 | 0 |
| 3104 | Cattle | Central | 0 | 0 | 0 | 0 | 0 | 1 |
| 3105 | Cattle | Central | 0 | 0 | 0 | 0 | 0 | 0 |
| 3106 | Cattle | Central | 0 | 0 | 0 | 0 | 0 | 0 |
| 3107 | Cattle | Central | 0 | 0 | 0 | 0 | 0 | 0 |
| 3108 | Cattle | Central | 0 | 0 | 0 | 0 | 0 | 0 |
| 3109 | Cattle | Central | 0 | 0 | 0 | 0 | 1 | 1 |
| 3110 | Cattle | Central | 0 | 0 | 0 | 0 | 0 | 0 |
| 3111 | Cattle | Central | 0 | 0 | 0 | 0 | 0 | 0 |
| 3112 | Cattle | Central | 0 | 0 | 0 | 0 | 0 | 0 |
| 3113 | Cattle | Central | 0 | 0 | 0 | 0 | 0 | 0 |
| 3114 | Cattle | Central | 0 | 0 | 0 | 0 | 0 | 0 |
| 3115 | Cattle | Central | 0 | 0 | 0 | 0 | 0 | 0 |
| 3116 | Cattle | Central | 0 | 0 | 0 | 1 | 0 | 1 |
| 3117 | Cattle | Central | 0 | 0 | 0 | 0 | 0 | 0 |
| 3118 | Cattle | Central | 0 | 0 | 0 | 0 | 0 | 0 |
| 3119 | Cattle | Central | 0 | 0 | 0 | 0 | 0 | 0 |

|      |        |         |   |   |   |   |   |   |
|------|--------|---------|---|---|---|---|---|---|
| 3120 | Cattle | Central | 0 | 0 | 0 | 0 | 0 | 0 |
| 3121 | Cattle | Central | 0 | 0 | 0 | 0 | 0 | 0 |
| 3122 | Cattle | Central | 0 | 0 | 0 | 0 | 0 | 0 |
| 3123 | Cattle | Central | 0 | 0 | 0 | 0 | 0 | 0 |
| 3124 | Cattle | Central | 0 | 0 | 0 | 0 | 0 | 0 |
| 3125 | Cattle | Central | 0 | 0 | 0 | 0 | 0 | 0 |
| 3126 | Cattle | Central | 0 | 0 | 0 | 0 | 0 | 0 |
| 3127 | Cattle | Central | 0 | 0 | 0 | 0 | 0 | 0 |
| 3128 | Cattle | Central | 0 | 0 | 0 | 0 | 0 | 0 |
| 3129 | Cattle | Central | 0 | 0 | 0 | 0 | 0 | 0 |
| 3130 | Cattle | Central | 0 | 0 | 0 | 0 | 0 | 0 |
| 3131 | Cattle | Central | 0 | 0 | 0 | 0 | 0 | 0 |
| 3132 | Cattle | Central | 0 | 0 | 0 | 0 | 0 | 0 |
| 3133 | Cattle | Central | 0 | 0 | 0 | 0 | 0 | 0 |
| 3134 | Cattle | Central | 0 | 0 | 0 | 0 | 0 | 0 |
| 3135 | Cattle | Central | 0 | 0 | 0 | 0 | 0 | 0 |
| 3136 | Cattle | Central | 0 | 0 | 0 | 0 | 0 | 0 |
| 3137 | Cattle | Central | 0 | 0 | 0 | 0 | 0 | 0 |
| 3138 | Cattle | Central | 0 | 0 | 0 | 0 | 0 | 0 |
| 3139 | Cattle | Central | 0 | 0 | 0 | 0 | 0 | 0 |
| 3140 | Cattle | Central | 0 | 0 | 0 | 0 | 0 | 1 |
| 3141 | Cattle | Central | 0 | 0 | 0 | 0 | 0 | 0 |
| 3142 | Cattle | Central | 0 | 0 | 0 | 0 | 0 | 0 |
| 3143 | Cattle | Central | 0 | 0 | 0 | 0 | 0 | 1 |
| 3144 | Cattle | Central | 0 | 0 | 0 | 0 | 0 | 0 |
| 3145 | Cattle | Central | 0 | 0 | 0 | 1 | 0 | 1 |
| 3146 | Cattle | Central | 0 | 0 | 0 | 0 | 0 | 0 |
| 3147 | Cattle | Central | 0 | 0 | 0 | 0 | 0 | 0 |
| 3148 | Cattle | Central | 0 | 0 | 0 | 0 | 0 | 0 |
| 3149 | Cattle | Central | 0 | 0 | 0 | 0 | 0 | 0 |
| 3150 | Cattle | Central | 0 | 0 | 0 | 0 | 0 | 0 |
| 3151 | Cattle | Central | 0 | 0 | 0 | 0 | 0 | 0 |
| 3152 | Cattle | Central | 0 | 0 | 0 | 0 | 0 | 0 |
| 3153 | Cattle | Central | 0 | 0 | 0 | 0 | 0 | 0 |
| 3154 | Cattle | Central | 0 | 0 | 0 | 0 | 0 | 0 |
| 3155 | Cattle | Central | 0 | 0 | 0 | 0 | 0 | 0 |
| 3156 | Cattle | Central | 0 | 0 | 0 | 0 | 0 | 0 |
| 3157 | Cattle | Central | 0 | 0 | 0 | 0 | 0 | 0 |
| 3158 | Cattle | Central | 0 | 0 | 0 | 0 | 0 | 0 |
| 3159 | Cattle | Central | 0 | 0 | 0 | 0 | 0 | 0 |
| 3160 | Cattle | Central | 0 | 0 | 0 | 0 | 0 | 0 |
| 3161 | Cattle | Central | 0 | 0 | 0 | 0 | 0 | 0 |
| 3162 | Cattle | Central | 0 | 0 | 0 | 0 | 0 | 0 |
| 3163 | Cattle | Central | 0 | 0 | 0 | 0 | 0 | 0 |
| 3164 | Cattle | Central | 0 | 0 | 0 | 0 | 0 | 0 |
| 3165 | Cattle | Central | 0 | 0 | 0 | 0 | 0 | 0 |
| 3166 | Cattle | Central | 0 | 0 | 0 | 0 | 0 | 0 |
| 3167 | Cattle | Central | 0 | 0 | 0 | 0 | 0 | 0 |

|      |        |         |   |   |   |   |   |   |
|------|--------|---------|---|---|---|---|---|---|
| 3168 | Cattle | Central | 0 | 0 | 0 | 0 | 0 | 0 |
| 3169 | Cattle | Central | 0 | 0 | 0 | 0 | 0 | 0 |
| 3170 | Cattle | Central | 0 | 0 | 0 | 0 | 0 | 0 |
| 3171 | Cattle | Central | 0 | 0 | 0 | 0 | 0 | 0 |
| 3172 | Cattle | Central | 0 | 0 | 0 | 0 | 0 | 0 |
| 3173 | Cattle | Central | 0 | 0 | 0 | 0 | 0 | 0 |
| 3174 | Cattle | Central | 0 | 0 | 0 | 0 | 0 | 0 |
| 3175 | Cattle | Central | 0 | 0 | 0 | 0 | 0 | 0 |
| 3176 | Cattle | Central | 0 | 0 | 0 | 0 | 0 | 0 |
| 3177 | Cattle | Central | 0 | 0 | 0 | 0 | 0 | 0 |
| 3178 | Cattle | Central | 0 | 0 | 0 | 0 | 0 | 0 |
| 3179 | Cattle | Central | 0 | 0 | 0 | 0 | 0 | 0 |
| 3180 | Cattle | Central | 0 | 0 | 0 | 0 | 0 | 0 |
| 3181 | Cattle | Central | 0 | 0 | 0 | 0 | 0 | 0 |
| 3182 | Cattle | Central | 0 | 0 | 0 | 0 | 0 | 0 |
| 3183 | Cattle | Central | 0 | 0 | 0 | 0 | 0 | 0 |
| 3184 | Cattle | Central | 0 | 0 | 0 | 0 | 0 | 0 |
| 3185 | Cattle | Central | 0 | 0 | 0 | 0 | 0 | 0 |
| 3186 | Cattle | Central | 0 | 0 | 0 | 0 | 0 | 0 |
| 3187 | Cattle | Central | 0 | 0 | 0 | 0 | 0 | 0 |
| 3188 | Cattle | Central | 0 | 0 | 0 | 0 | 0 | 0 |
| 3189 | Cattle | Central | 0 | 0 | 0 | 0 | 0 | 0 |
| 3190 | Cattle | Central | 0 | 0 | 0 | 0 | 0 | 0 |
| 3191 | Cattle | Central | 0 | 0 | 0 | 0 | 0 | 0 |
| 3192 | Cattle | Central | 0 | 0 | 0 | 0 | 0 | 0 |
| 3193 | Cattle | Central | 0 | 0 | 0 | 0 | 0 | 0 |
| 3194 | Cattle | Central | 0 | 0 | 0 | 0 | 0 | 0 |
| 3195 | Cattle | Central | 0 | 0 | 0 | 0 | 0 | 0 |
| 3196 | Cattle | Central | 0 | 0 | 0 | 0 | 0 | 0 |
| 3197 | Cattle | Central | 0 | 0 | 0 | 0 | 0 | 0 |
| 3198 | Cattle | Central | 0 | 0 | 0 | 0 | 0 | 0 |
| 3199 | Cattle | Central | 0 | 0 | 0 | 0 | 0 | 0 |
| 3200 | Cattle | Central | 0 | 0 | 0 | 0 | 0 | 0 |
| 3201 | Cattle | Central | 0 | 0 | 0 | 0 | 0 | 0 |
| 3202 | Cattle | Central | 0 | 0 | 0 | 0 | 0 | 0 |
| 3203 | Cattle | Central | 0 | 0 | 0 | 0 | 0 | 0 |
| 3204 | Cattle | Central | 0 | 0 | 0 | 0 | 0 | 0 |
| 3205 | Cattle | Central | 0 | 0 | 0 | 0 | 0 | 0 |
| 3206 | Cattle | Central | 0 | 0 | 0 | 0 | 0 | 0 |
| 3207 | Cattle | Central | 0 | 0 | 0 | 0 | 0 | 0 |
| 3208 | Cattle | Central | 0 | 0 | 0 | 0 | 0 | 0 |
| 3209 | Cattle | Central | 0 | 0 | 0 | 0 | 0 | 0 |
| 3210 | Cattle | Central | 0 | 0 | 0 | 0 | 0 | 0 |
| 3211 | Cattle | Central | 0 | 0 | 0 | 0 | 0 | 0 |
| 3212 | Cattle | Central | 0 | 0 | 0 | 0 | 0 | 0 |
| 3213 | Cattle | Central | 0 | 0 | 0 | 0 | 0 | 0 |
| 3214 | Cattle | Central | 0 | 0 | 0 | 0 | 0 | 0 |
| 3215 | Cattle | Central | 0 | 0 | 0 | 0 | 0 | 0 |

|      |        |          |   |   |   |   |   |   |
|------|--------|----------|---|---|---|---|---|---|
| 3216 | Cattle | Central  | 0 | 0 | 0 | 0 | 0 | 0 |
| 3217 | Cattle | Central  | 0 | 0 | 0 | 0 | 0 | 0 |
| 3218 | Cattle | Central  | 0 | 0 | 0 | 0 | 0 | 0 |
| 3219 | Cattle | Central  | 0 | 0 | 0 | 0 | 0 | 0 |
| 3220 | Cattle | Central  | 0 | 0 | 0 | 0 | 0 | 0 |
| 3221 | Cattle | Central  | 0 | 0 | 0 | 0 | 0 | 0 |
| 3222 | Cattle | Central  | 0 | 0 | 0 | 0 | 0 | 0 |
| 3223 | Cattle | Central  | 0 | 0 | 0 | 0 | 0 | 0 |
| 3224 | Cattle | Central  | 0 | 0 | 0 | 0 | 0 | 0 |
| 3225 | Cattle | Central  | 0 | 0 | 0 | 0 | 0 | 0 |
| 3226 | Cattle | Northern | 0 | 0 | 0 | 0 | 0 | 0 |
| 3227 | Cattle | Northern | 0 | 0 | 0 | 0 | 0 | 0 |
| 3228 | Cattle | Northern | 0 | 0 | 0 | 0 | 0 | 0 |
| 3229 | Cattle | Northern | 0 | 0 | 0 | 0 | 0 | 0 |
| 3230 | Cattle | Northern | 0 | 0 | 0 | 0 | 0 | 0 |
| 3231 | Cattle | Northern | 0 | 0 | 0 | 0 | 0 | 0 |
| 3232 | Cattle | Northern | 0 | 0 | 0 | 0 | 0 | 0 |
| 3233 | Cattle | Northern | 0 | 0 | 0 | 0 | 0 | 0 |
| 3234 | Cattle | Northern | 0 | 0 | 0 | 0 | 0 | 0 |
| 3235 | Cattle | Northern | 0 | 0 | 0 | 0 | 0 | 0 |
| 3236 | Cattle | Northern | 0 | 0 | 0 | 0 | 0 | 0 |
| 3237 | Cattle | Northern | 0 | 0 | 0 | 0 | 0 | 0 |
| 3238 | Cattle | Northern | 0 | 0 | 0 | 0 | 0 | 0 |
| 3239 | Cattle | Northern | 0 | 0 | 0 | 0 | 0 | 0 |
| 3240 | Cattle | Northern | 0 | 0 | 0 | 0 | 0 | 0 |
| 3241 | Cattle | Northern | 0 | 0 | 0 | 0 | 0 | 0 |
| 3242 | Cattle | Northern | 0 | 0 | 0 | 0 | 0 | 0 |
| 3243 | Cattle | Northern | 0 | 0 | 0 | 0 | 0 | 0 |
| 3244 | Cattle | Northern | 0 | 0 | 0 | 0 | 0 | 0 |
| 3245 | Cattle | Northern | 0 | 0 | 0 | 0 | 0 | 0 |
| 3246 | Cattle | Northern | 0 | 0 | 0 | 0 | 0 | 0 |
| 3247 | Cattle | Northern | 0 | 0 | 0 | 0 | 0 | 0 |
| 3248 | Cattle | Northern | 0 | 0 | 0 | 0 | 0 | 0 |
| 3249 | Cattle | Northern | 0 | 0 | 0 | 0 | 0 | 0 |
| 3250 | Cattle | Northern | 0 | 0 | 0 | 0 | 0 | 0 |
| 3251 | Cattle | Northern | 0 | 0 | 0 | 0 | 0 | 0 |
| 3252 | Cattle | Northern | 0 | 0 | 0 | 0 | 0 | 0 |
| 3253 | Cattle | Northern | 0 | 0 | 0 | 0 | 0 | 0 |
| 3254 | Cattle | Northern | 0 | 0 | 0 | 0 | 0 | 0 |
| 3255 | Cattle | Northern | 0 | 0 | 0 | 0 | 0 | 0 |
| 3256 | Cattle | Northern | 0 | 0 | 0 | 0 | 0 | 0 |
| 3257 | Cattle | Northern | 0 | 0 | 0 | 0 | 0 | 0 |
| 3258 | Cattle | Northern | 0 | 0 | 0 | 0 | 0 | 0 |
| 3259 | Cattle | Northern | 0 | 0 | 0 | 0 | 0 | 0 |
| 3260 | Cattle | Northern | 0 | 0 | 0 | 0 | 0 | 0 |
| 3261 | Cattle | Northern | 0 | 0 | 0 | 0 | 0 | 0 |
| 3262 | Cattle | Northern | 0 | 0 | 0 | 0 | 0 | 0 |
| 3263 | Cattle | Northern | 0 | 0 | 0 | 0 | 0 | 0 |

|      |        |          |   |   |   |   |   |   |
|------|--------|----------|---|---|---|---|---|---|
| 3264 | Cattle | Northern | 0 | 0 | 0 | 0 | 0 | 0 |
| 3265 | Cattle | Northern | 0 | 0 | 0 | 0 | 0 | 0 |
| 3266 | Cattle | Northern | 0 | 0 | 0 | 0 | 0 | 0 |
| 3267 | Cattle | Northern | 0 | 0 | 0 | 0 | 0 | 0 |
| 3268 | Cattle | Northern | 0 | 0 | 0 | 0 | 0 | 0 |
| 3269 | Cattle | Northern | 0 | 0 | 0 | 0 | 0 | 0 |
| 3270 | Cattle | Northern | 0 | 0 | 0 | 0 | 0 | 0 |
| 3271 | Cattle | Northern | 0 | 0 | 0 | 0 | 0 | 0 |
| 3272 | Cattle | Northern | 0 | 0 | 0 | 0 | 0 | 0 |
| 3273 | Cattle | Northern | 0 | 0 | 0 | 0 | 0 | 0 |
| 3274 | Cattle | Northern | 0 | 0 | 0 | 0 | 0 | 0 |
| 3275 | Cattle | Northern | 0 | 0 | 0 | 0 | 0 | 0 |
| 3276 | Cattle | Northern | 0 | 0 | 0 | 0 | 0 | 0 |
| 3277 | Cattle | Northern | 0 | 0 | 0 | 0 | 0 | 0 |
| 3278 | Cattle | Northern | 0 | 0 | 0 | 0 | 0 | 0 |
| 3279 | Cattle | Northern | 0 | 1 | 0 | 0 | 0 | 1 |
| 3280 | Cattle | Northern | 0 | 0 | 0 | 0 | 0 | 0 |
| 3281 | Cattle | Northern | 0 | 0 | 0 | 0 | 0 | 0 |
| 3282 | Cattle | Northern | 0 | 0 | 0 | 0 | 0 | 0 |
| 3283 | Cattle | Northern | 0 | 0 | 0 | 0 | 0 | 0 |
| 3284 | Cattle | Northern | 0 | 0 | 0 | 0 | 0 | 0 |
| 3285 | Cattle | Northern | 0 | 0 | 0 | 0 | 0 | 0 |
| 3286 | Cattle | Northern | 0 | 0 | 0 | 0 | 0 | 0 |
| 3287 | Cattle | Northern | 0 | 0 | 0 | 0 | 0 | 0 |
| 3288 | Cattle | Northern | 0 | 0 | 0 | 0 | 0 | 0 |
| 3289 | Cattle | Northern | 0 | 0 | 0 | 0 | 0 | 0 |
| 3290 | Cattle | Northern | 0 | 0 | 0 | 0 | 0 | 0 |
| 3291 | Cattle | Northern | 0 | 0 | 0 | 0 | 0 | 0 |
| 3292 | Cattle | Northern | 0 | 0 | 0 | 0 | 0 | 0 |
| 3293 | Cattle | Northern | 0 | 0 | 0 | 0 | 0 | 0 |
| 3294 | Cattle | Northern | 0 | 0 | 0 | 0 | 0 | 0 |
| 3295 | Cattle | Northern | 0 | 0 | 0 | 0 | 0 | 0 |
| 3296 | Cattle | Northern | 0 | 0 | 0 | 0 | 0 | 0 |
| 3297 | Cattle | Northern | 0 | 0 | 0 | 0 | 0 | 0 |
| 3298 | Cattle | Northern | 0 | 0 | 0 | 0 | 0 | 0 |
| 3299 | Cattle | Northern | 0 | 0 | 0 | 0 | 0 | 0 |
| 3300 | Cattle | Northern | 0 | 0 | 0 | 0 | 0 | 0 |
| 3301 | Cattle | Northern | 0 | 0 | 0 | 0 | 0 | 0 |
| 3302 | Cattle | Northern | 0 | 0 | 0 | 0 | 0 | 0 |
| 3303 | Cattle | Northern | 0 | 0 | 0 | 0 | 0 | 0 |
| 3304 | Cattle | Northern | 0 | 0 | 0 | 0 | 0 | 0 |
| 3305 | Cattle | Northern | 0 | 0 | 0 | 0 | 0 | 0 |
| 3306 | Cattle | Northern | 0 | 0 | 0 | 0 | 0 | 0 |
| 3307 | Cattle | Northern | 0 | 0 | 0 | 0 | 0 | 0 |
| 3308 | Cattle | Northern | 0 | 0 | 0 | 0 | 0 | 0 |
| 3309 | Cattle | Northern | 0 | 0 | 0 | 0 | 0 | 0 |
| 3310 | Cattle | Northern | 0 | 0 | 0 | 0 | 0 | 0 |
| 3311 | Cattle | Northern | 0 | 0 | 0 | 0 | 0 | 0 |

|      |        |          |   |   |   |   |   |   |
|------|--------|----------|---|---|---|---|---|---|
| 3312 | Cattle | Northern | 0 | 0 | 0 | 0 | 0 | 0 |
| 3313 | Cattle | Northern | 0 | 0 | 0 | 0 | 0 | 0 |
| 3314 | Cattle | Northern | 0 | 0 | 0 | 0 | 0 | 0 |
| 3315 | Cattle | Northern | 0 | 0 | 0 | 0 | 0 | 0 |
| 3316 | Cattle | Northern | 0 | 0 | 0 | 0 | 0 | 0 |
| 3317 | Cattle | Northern | 0 | 0 | 0 | 0 | 0 | 0 |
| 3318 | Cattle | Northern | 0 | 0 | 0 | 0 | 0 | 0 |
| 3319 | Cattle | Northern | 0 | 0 | 0 | 0 | 0 | 0 |
| 3320 | Cattle | Northern | 0 | 0 | 0 | 0 | 0 | 0 |
| 3321 | Cattle | Northern | 0 | 0 | 0 | 0 | 0 | 0 |
| 3322 | Cattle | Northern | 0 | 0 | 0 | 0 | 0 | 0 |
| 3323 | Cattle | Northern | 0 | 0 | 0 | 0 | 0 | 0 |
| 3324 | Cattle | Northern | 0 | 0 | 0 | 0 | 0 | 0 |
| 3325 | Cattle | Northern | 0 | 0 | 0 | 0 | 0 | 0 |
| 3326 | Cattle | Northern | 0 | 0 | 0 | 0 | 0 | 0 |
| 3327 | Cattle | Northern | 0 | 0 | 0 | 0 | 0 | 0 |
| 3328 | Cattle | Northern | 0 | 0 | 0 | 0 | 0 | 0 |
| 3329 | Cattle | Northern | 0 | 0 | 0 | 0 | 0 | 0 |
| 3330 | Cattle | Northern | 0 | 0 | 0 | 0 | 0 | 0 |
| 3331 | Cattle | Northern | 0 | 0 | 0 | 0 | 0 | 0 |
| 3332 | Cattle | Northern | 0 | 0 | 0 | 0 | 0 | 0 |
| 3333 | Cattle | Northern | 0 | 0 | 0 | 0 | 0 | 0 |
| 3334 | Cattle | Northern | 0 | 0 | 0 | 0 | 0 | 0 |
| 3335 | Cattle | Northern | 0 | 0 | 0 | 0 | 0 | 0 |
| 3336 | Cattle | Northern | 0 | 0 | 0 | 0 | 0 | 0 |
| 3337 | Cattle | Northern | 0 | 0 | 0 | 0 | 0 | 0 |
| 3338 | Cattle | Northern | 0 | 0 | 0 | 0 | 0 | 0 |
| 3339 | Cattle | Northern | 0 | 0 | 0 | 0 | 0 | 0 |
| 3340 | Cattle | Northern | 0 | 0 | 0 | 0 | 0 | 0 |
| 3341 | Cattle | Northern | 0 | 0 | 0 | 0 | 0 | 0 |
| 3342 | Cattle | Northern | 0 | 0 | 0 | 0 | 0 | 0 |
| 3343 | Cattle | Northern | 0 | 0 | 0 | 0 | 0 | 0 |
| 3344 | Cattle | Northern | 0 | 0 | 0 | 0 | 0 | 0 |
| 3345 | Cattle | Northern | 0 | 0 | 0 | 0 | 0 | 0 |
| 3346 | Cattle | Northern | 0 | 0 | 0 | 0 | 0 | 0 |
| 3347 | Cattle | Northern | 0 | 0 | 0 | 0 | 0 | 0 |
| 3348 | Cattle | Northern | 0 | 0 | 0 | 0 | 0 | 0 |
| 3349 | Cattle | Northern | 0 | 0 | 0 | 0 | 0 | 0 |
| 3350 | Cattle | Northern | 0 | 0 | 0 | 0 | 0 | 0 |
| 3351 | Cattle | Northern | 0 | 0 | 0 | 0 | 0 | 0 |
| 3352 | Cattle | Northern | 0 | 0 | 0 | 0 | 0 | 0 |
| 3353 | Cattle | Northern | 0 | 0 | 0 | 0 | 0 | 0 |
| 3354 | Cattle | Northern | 0 | 0 | 0 | 0 | 0 | 0 |
| 3355 | Cattle | Northern | 0 | 0 | 0 | 0 | 0 | 0 |
| 3356 | Cattle | Northern | 0 | 0 | 0 | 0 | 0 | 0 |
| 3357 | Cattle | Northern | 0 | 0 | 0 | 0 | 0 | 0 |
| 3358 | Cattle | Northern | 0 | 0 | 0 | 0 | 0 | 0 |
| 3359 | Cattle | Northern | 0 | 0 | 0 | 0 | 0 | 0 |

|      |        |          |   |   |   |   |   |   |
|------|--------|----------|---|---|---|---|---|---|
| 3360 | Cattle | Northern | 0 | 0 | 0 | 0 | 0 | 0 |
| 3361 | Cattle | Northern | 0 | 0 | 0 | 0 | 0 | 0 |
| 3362 | Cattle | Northern | 0 | 0 | 0 | 0 | 0 | 0 |
| 3363 | Cattle | Northern | 0 | 0 | 0 | 0 | 0 | 0 |
| 3364 | Cattle | Northern | 0 | 0 | 0 | 0 | 0 | 0 |
| 3365 | Cattle | Northern | 0 | 0 | 0 | 0 | 0 | 0 |
| 3366 | Cattle | Northern | 0 | 0 | 0 | 0 | 0 | 0 |
| 3367 | Cattle | Northern | 0 | 0 | 0 | 0 | 0 | 0 |
| 3368 | Cattle | Northern | 0 | 0 | 0 | 0 | 0 | 0 |
| 3369 | Cattle | Northern | 0 | 0 | 0 | 0 | 0 | 0 |
| 3370 | Cattle | Northern | 0 | 0 | 0 | 0 | 0 | 0 |
| 3371 | Cattle | Northern | 0 | 0 | 0 | 0 | 0 | 0 |
| 3372 | Cattle | Northern | 0 | 0 | 0 | 0 | 0 | 0 |
| 3373 | Cattle | Northern | 0 | 0 | 0 | 0 | 0 | 0 |
| 3374 | Cattle | Northern | 0 | 0 | 0 | 0 | 0 | 0 |
| 3375 | Cattle | Northern | 0 | 0 | 0 | 0 | 0 | 0 |
| 3376 | Cattle | Northern | 0 | 0 | 0 | 0 | 0 | 0 |
| 3377 | Cattle | Northern | 0 | 0 | 0 | 0 | 0 | 0 |
| 3378 | Cattle | Northern | 0 | 0 | 0 | 0 | 0 | 0 |
| 3379 | Cattle | Northern | 0 | 0 | 0 | 0 | 0 | 0 |
| 3380 | Cattle | Northern | 0 | 0 | 0 | 0 | 0 | 0 |
| 3381 | Cattle | Northern | 0 | 0 | 0 | 0 | 0 | 0 |
| 3382 | Cattle | Northern | 0 | 0 | 0 | 0 | 0 | 0 |
| 3383 | Cattle | Northern | 0 | 0 | 0 | 0 | 0 | 0 |
| 3384 | Cattle | Northern | 0 | 0 | 0 | 0 | 0 | 0 |
| 3385 | Cattle | Northern | 0 | 0 | 0 | 0 | 0 | 0 |
| 3386 | Cattle | Northern | 0 | 0 | 0 | 0 | 0 | 0 |
| 3387 | Cattle | Northern | 0 | 0 | 0 | 0 | 0 | 0 |
| 3388 | Cattle | Northern | 0 | 0 | 0 | 0 | 0 | 0 |
| 3389 | Cattle | Northern | 0 | 0 | 0 | 0 | 0 | 0 |
| 3390 | Cattle | Northern | 0 | 0 | 0 | 0 | 0 | 0 |
| 3391 | Cattle | Northern | 0 | 0 | 0 | 0 | 0 | 0 |
| 3392 | Cattle | Northern | 0 | 0 | 0 | 0 | 0 | 0 |
| 3393 | Cattle | Northern | 0 | 0 | 0 | 0 | 0 | 0 |
| 3394 | Cattle | Northern | 0 | 0 | 0 | 0 | 0 | 0 |
| 3395 | Cattle | Northern | 0 | 0 | 0 | 0 | 0 | 0 |
| 3396 | Cattle | Northern | 0 | 0 | 0 | 0 | 0 | 0 |
| 3397 | Cattle | Northern | 0 | 0 | 0 | 0 | 0 | 0 |
| 3398 | Cattle | Northern | 0 | 0 | 0 | 0 | 0 | 0 |
| 3399 | Cattle | Northern | 0 | 0 | 0 | 0 | 0 | 0 |
| 3400 | Cattle | Northern | 0 | 0 | 0 | 0 | 0 | 0 |
| 3401 | Cattle | Northern | 0 | 0 | 0 | 0 | 0 | 0 |
| 3402 | Cattle | Northern | 0 | 0 | 0 | 0 | 0 | 0 |
| 3403 | Cattle | Northern | 0 | 0 | 0 | 0 | 0 | 0 |
| 3404 | Cattle | Northern | 0 | 0 | 0 | 0 | 0 | 0 |
| 3405 | Cattle | Northern | 0 | 0 | 0 | 0 | 0 | 0 |
| 3406 | Cattle | Northern | 0 | 0 | 0 | 0 | 0 | 0 |
| 3407 | Cattle | Northern | 0 | 0 | 0 | 0 | 0 | 0 |

|      |        |              |   |   |   |   |   |   |
|------|--------|--------------|---|---|---|---|---|---|
| 3408 | Cattle | Northern     | 0 | 0 | 0 | 0 | 0 | 0 |
| 3409 | Cattle | Northern     | 0 | 0 | 0 | 0 | 0 | 0 |
| 3410 | Cattle | Northern     | 0 | 0 | 0 | 0 | 0 | 0 |
| 3411 | Cattle | Northern     | 0 | 0 | 0 | 0 | 0 | 0 |
| 3412 | Cattle | Northern     | 0 | 0 | 0 | 0 | 0 | 0 |
| 3413 | Cattle | Northern     | 0 | 0 | 0 | 0 | 0 | 0 |
| 3414 | Cattle | Northern     | 0 | 0 | 0 | 0 | 0 | 0 |
| 3415 | Cattle | Northern     | 0 | 0 | 0 | 0 | 0 | 0 |
| 3416 | Cattle | Northern     | 0 | 0 | 0 | 0 | 0 | 0 |
| 3417 | Cattle | Northern     | 0 | 0 | 0 | 0 | 0 | 0 |
| 3418 | Cattle | Northern     | 0 | 0 | 0 | 0 | 0 | 0 |
| 3419 | Cattle | Northern     | 0 | 0 | 0 | 0 | 0 | 0 |
| 3420 | Cattle | Northern     | 0 | 0 | 0 | 0 | 0 | 0 |
| 3421 | Cattle | Northern     | 0 | 0 | 0 | 0 | 0 | 0 |
| 3422 | Cattle | Northern     | 0 | 0 | 0 | 0 | 0 | 0 |
| 3423 | Cattle | Northern     | 0 | 0 | 0 | 0 | 0 | 0 |
| 3424 | Cattle | Northern     | 0 | 0 | 0 | 0 | 0 | 0 |
| 3425 | Cattle | Northern     | 0 | 0 | 0 | 0 | 0 | 0 |
| 3426 | Cattle | Northern     | 0 | 0 | 0 | 0 | 0 | 0 |
| 3427 | Cattle | Northern     | 0 | 0 | 0 | 0 | 0 | 0 |
| 3428 | Cattle | Northern     | 0 | 0 | 0 | 0 | 0 | 0 |
| 3429 | Cattle | Northern     | 0 | 0 | 0 | 0 | 0 | 0 |
| 3430 | Cattle | Northern     | 0 | 0 | 0 | 0 | 0 | 0 |
| 3431 | Cattle | Northern     | 0 | 0 | 0 | 0 | 0 | 0 |
| 3432 | Cattle | Northern     | 0 | 0 | 0 | 0 | 0 | 0 |
| 3433 | Cattle | Northern     | 0 | 0 | 0 | 0 | 0 | 0 |
| 3434 | Cattle | Northern     | 0 | 0 | 0 | 0 | 0 | 0 |
| 3435 | Cattle | Northern     | 0 | 0 | 0 | 0 | 0 | 0 |
| 3436 | Cattle | Northern     | 0 | 0 | 0 | 0 | 0 | 0 |
| 3437 | Cattle | Northern     | 0 | 0 | 0 | 0 | 0 | 0 |
| 3438 | Cattle | Northern     | 0 | 0 | 0 | 0 | 0 | 0 |
| 3439 | Cattle | Northern     | 0 | 0 | 0 | 0 | 0 | 0 |
| 3440 | Cattle | Northern     | 0 | 0 | 0 | 0 | 0 | 0 |
| 3441 | Cattle | Northern     | 0 | 0 | 0 | 0 | 0 | 0 |
| 3442 | Cattle | Northern     | 0 | 0 | 0 | 0 | 0 | 0 |
| 3443 | Cattle | Northern     | 0 | 0 | 0 | 0 | 0 | 0 |
| 3444 | Cattle | Northern     | 0 | 0 | 0 | 0 | 0 | 0 |
| 3445 | Cattle | Northern     | 0 | 0 | 0 | 0 | 0 | 0 |
| 3446 | Cattle | Northern     | 0 | 0 | 0 | 0 | 0 | 0 |
| 3447 | Cattle | Northern     | 0 | 0 | 0 | 0 | 0 | 0 |
| 3448 | Cattle | Northern     | 0 | 0 | 0 | 0 | 0 | 0 |
| 3449 | Cattle | Northern     | 0 | 0 | 0 | 0 | 0 | 0 |
| 3450 | Cattle | Northern     | 0 | 0 | 0 | 0 | 0 | 0 |
| 3451 | Cattle | Northern     | 0 | 0 | 0 | 0 | 0 | 0 |
| 3452 | Cattle | Northeastern | 0 | 0 | 0 | 0 | 0 | 0 |
| 3453 | Cattle | Northeastern | 0 | 0 | 0 | 0 | 0 | 0 |
| 3454 | Cattle | Northeastern | 0 | 0 | 0 | 0 | 0 | 0 |
| 3455 | Cattle | Southern     | 0 | 0 | 0 | 0 | 0 | 0 |



|      |        |              |   |   |   |   |   |   |
|------|--------|--------------|---|---|---|---|---|---|
| 3456 | Cattle | Northeastern | 0 | 0 | 0 | 0 | 0 | 0 |
| 3457 | Cattle | Northeastern | 0 | 0 | 0 | 0 | 0 | 0 |
| 3458 | Cattle | Northeastern | 0 | 0 | 0 | 0 | 0 | 0 |
| 3459 | Cattle | Northeastern | 0 | 0 | 0 | 0 | 0 | 0 |
| 3460 | Cattle | Northeastern | 0 | 0 | 0 | 0 | 0 | 0 |
| 3461 | Cattle | Northeastern | 0 | 0 | 0 | 0 | 0 | 0 |
| 3462 | Cattle | Northeastern | 0 | 0 | 0 | 0 | 0 | 0 |
| 3463 | Cattle | Northeastern | 0 | 0 | 0 | 0 | 0 | 0 |
| 3464 | Cattle | Northeastern | 0 | 0 | 0 | 0 | 0 | 0 |
| 3465 | Cattle | Northeastern | 0 | 0 | 0 | 0 | 0 | 0 |
| 3466 | Cattle | Northeastern | 0 | 0 | 0 | 0 | 0 | 0 |
| 3467 | Cattle | Northeastern | 0 | 0 | 0 | 0 | 0 | 0 |
| 3468 | Cattle | Northeastern | 0 | 0 | 0 | 0 | 0 | 0 |
| 3469 | Cattle | Northeastern | 0 | 0 | 0 | 0 | 0 | 0 |
| 3470 | Cattle | Northeastern | 0 | 0 | 0 | 0 | 0 | 0 |
| 3471 | Cattle | Northeastern | 0 | 0 | 0 | 0 | 0 | 0 |
| 3472 | Cattle | Northeastern | 0 | 0 | 0 | 0 | 0 | 0 |
| 3473 | Cattle | Northeastern | 0 | 0 | 0 | 0 | 0 | 0 |
| 3474 | Cattle | Northeastern | 0 | 0 | 0 | 0 | 0 | 0 |
| 3475 | Cattle | Northeastern | 0 | 0 | 0 | 0 | 0 | 0 |
| 3476 | Cattle | Northeastern | 0 | 0 | 0 | 0 | 0 | 0 |
| 3477 | Cattle | Northeastern | 0 | 0 | 0 | 0 | 0 | 0 |
| 3478 | Cattle | Central      | 0 | 0 | 0 | 0 | 0 | 0 |
| 3479 | Cattle | Central      | 0 | 0 | 0 | 0 | 0 | 0 |
| 3480 | Cattle | Central      | 0 | 0 | 0 | 0 | 0 | 0 |
| 3481 | Cattle | Central      | 0 | 0 | 0 | 0 | 0 | 0 |
| 3482 | Cattle | Central      | 0 | 0 | 0 | 0 | 0 | 0 |
| 3483 | Cattle | Central      | 0 | 0 | 0 | 0 | 0 | 0 |
| 3484 | Cattle | Central      | 0 | 0 | 0 | 0 | 0 | 0 |
| 3485 | Cattle | Central      | 0 | 0 | 0 | 0 | 0 | 0 |
| 3486 | Cattle | Central      | 0 | 0 | 0 | 0 | 0 | 0 |
| 3487 | Cattle | Central      | 0 | 0 | 0 | 0 | 0 | 0 |
| 3488 | Cattle | Central      | 0 | 0 | 0 | 0 | 0 | 0 |
| 3489 | Cattle | Central      | 0 | 0 | 0 | 0 | 0 | 0 |
| 3490 | Cattle | Central      | 0 | 0 | 0 | 0 | 0 | 0 |
| 3491 | Cattle | Central      | 0 | 0 | 0 | 0 | 0 | 0 |
| 3492 | Cattle | Central      | 0 | 0 | 0 | 0 | 0 | 0 |
| 3493 | Cattle | Central      | 0 | 0 | 0 | 0 | 0 | 0 |
| 3494 | Cattle | Central      | 0 | 0 | 0 | 0 | 0 | 0 |
| 3495 | Cattle | Central      | 0 | 0 | 0 | 0 | 0 | 0 |
| 3496 | Cattle | Central      | 0 | 0 | 0 | 0 | 0 | 0 |
| 3497 | Cattle | Central      | 0 | 0 | 0 | 0 | 0 | 0 |
| 3498 | Cattle | Central      | 0 | 0 | 0 | 0 | 0 | 0 |
| 3499 | Cattle | Central      | 0 | 0 | 0 | 0 | 0 | 0 |
| 3500 | Cattle | Central      | 0 | 0 | 0 | 0 | 0 | 0 |
| 3501 | Cattle | Central      | 0 | 0 | 0 | 0 | 0 | 0 |
| 3502 | Cattle | Central      | 0 | 0 | 0 | 0 | 0 | 0 |
| 3503 | Cattle | Central      | 0 | 0 | 0 | 0 | 0 | 0 |

|      |        |         |   |   |   |   |   |   |
|------|--------|---------|---|---|---|---|---|---|
| 3504 | Cattle | Central | 0 | 0 | 0 | 0 | 0 | 0 |
| 3505 | Cattle | Central | 0 | 0 | 0 | 0 | 0 | 0 |
| 3506 | Cattle | Central | 0 | 0 | 0 | 0 | 0 | 0 |
| 3507 | Cattle | Central | 0 | 0 | 0 | 0 | 0 | 0 |
| 3508 | Cattle | Central | 0 | 0 | 0 | 0 | 0 | 0 |
| 3509 | Cattle | Central | 0 | 0 | 0 | 0 | 0 | 0 |
| 3510 | Cattle | Central | 0 | 0 | 0 | 0 | 0 | 0 |
| 3511 | Cattle | Central | 0 | 0 | 0 | 0 | 0 | 0 |
| 3512 | Cattle | Central | 0 | 0 | 0 | 0 | 0 | 0 |
| 3513 | Cattle | Central | 0 | 0 | 0 | 0 | 0 | 0 |
| 3514 | Cattle | Central | 0 | 0 | 0 | 0 | 0 | 0 |
| 3515 | Cattle | Central | 0 | 0 | 0 | 0 | 0 | 0 |
| 3516 | Cattle | Central | 0 | 0 | 0 | 0 | 0 | 0 |
| 3517 | Cattle | Central | 0 | 0 | 0 | 0 | 0 | 0 |
| 3518 | Cattle | Central | 0 | 0 | 0 | 0 | 0 | 0 |
| 3519 | Cattle | Central | 0 | 0 | 0 | 0 | 0 | 0 |
| 3520 | Cattle | Central | 0 | 0 | 0 | 0 | 0 | 0 |
| 3521 | Cattle | Central | 0 | 0 | 0 | 0 | 0 | 0 |
| 3522 | Cattle | Central | 0 | 0 | 0 | 0 | 0 | 0 |
| 3523 | Cattle | Central | 0 | 0 | 0 | 0 | 0 | 0 |
| 3524 | Cattle | Central | 0 | 0 | 0 | 0 | 0 | 0 |
| 3525 | Cattle | Central | 0 | 0 | 0 | 0 | 0 | 0 |
| 3526 | Cattle | Central | 0 | 0 | 0 | 0 | 0 | 0 |
| 3527 | Cattle | Central | 0 | 0 | 0 | 0 | 0 | 0 |
| 3528 | Cattle | Central | 0 | 0 | 0 | 0 | 0 | 0 |
| 3529 | Cattle | Central | 0 | 0 | 0 | 0 | 0 | 0 |
| 3530 | Cattle | Central | 0 | 0 | 0 | 0 | 0 | 0 |
| 3531 | Cattle | Central | 0 | 0 | 0 | 0 | 0 | 0 |
| 3532 | Cattle | Central | 0 | 0 | 0 | 0 | 0 | 0 |
| 3533 | Cattle | Central | 0 | 0 | 0 | 0 | 0 | 0 |
| 3534 | Cattle | Central | 0 | 0 | 0 | 0 | 0 | 0 |
| 3535 | Cattle | Central | 0 | 0 | 0 | 0 | 0 | 0 |
| 3536 | Cattle | Central | 0 | 0 | 0 | 0 | 0 | 0 |
| 3537 | Cattle | Central | 0 | 0 | 0 | 0 | 0 | 0 |
| 3538 | Cattle | Central | 0 | 0 | 0 | 0 | 0 | 0 |
| 3539 | Cattle | Central | 0 | 0 | 0 | 0 | 0 | 0 |
| 3540 | Cattle | Central | 0 | 0 | 0 | 0 | 0 | 0 |
| 3541 | Cattle | Central | 0 | 0 | 0 | 0 | 0 | 0 |
| 3542 | Cattle | Central | 0 | 0 | 0 | 0 | 0 | 0 |
| 3543 | Cattle | Central | 0 | 0 | 0 | 0 | 0 | 0 |
| 3544 | Cattle | Central | 0 | 0 | 0 | 0 | 0 | 0 |
| 3545 | Cattle | Central | 0 | 0 | 0 | 0 | 0 | 0 |
| 3546 | Cattle | Central | 0 | 0 | 0 | 0 | 0 | 0 |
| 3547 | Cattle | Central | 0 | 0 | 0 | 0 | 0 | 0 |
| 3548 | Cattle | Central | 0 | 0 | 0 | 0 | 0 | 0 |
| 3549 | Cattle | Central | 0 | 0 | 0 | 0 | 0 | 0 |
| 3550 | Cattle | Central | 0 | 0 | 0 | 0 | 0 | 0 |
| 3551 | Cattle | Central | 0 | 0 | 0 | 0 | 0 | 0 |

|      |        |              |   |   |   |   |   |   |
|------|--------|--------------|---|---|---|---|---|---|
| 3552 | Cattle | Central      | 0 | 0 | 0 | 0 | 0 | 0 |
| 3553 | Cattle | Central      | 0 | 0 | 0 | 0 | 0 | 0 |
| 3554 | Cattle | Central      | 0 | 0 | 0 | 0 | 0 | 0 |
| 3555 | Cattle | Central      | 0 | 0 | 0 | 0 | 0 | 0 |
| 3556 | Cattle | Central      | 0 | 0 | 0 | 0 | 0 | 0 |
| 3557 | Cattle | Central      | 0 | 0 | 0 | 0 | 0 | 0 |
| 3558 | Cattle | Central      | 0 | 0 | 0 | 0 | 0 | 0 |
| 3559 | Cattle | Central      | 0 | 1 | 0 | 0 | 0 | 1 |
| 3560 | Cattle | Central      | 0 | 0 | 0 | 0 | 0 | 0 |
| 3561 | Cattle | Central      | 0 | 0 | 0 | 0 | 0 | 0 |
| 3562 | Cattle | Central      | 0 | 0 | 0 | 0 | 0 | 0 |
| 3563 | Cattle | Central      | 0 | 0 | 0 | 0 | 0 | 0 |
| 3564 | Cattle | Central      | 0 | 0 | 0 | 0 | 0 | 0 |
| 3565 | Cattle | Central      | 0 | 0 | 0 | 0 | 0 | 0 |
| 3566 | Cattle | Northeastern | 0 | 0 | 0 | 0 | 0 | 0 |
| 3567 | Cattle | Northeastern | 0 | 0 | 0 | 0 | 0 | 0 |
| 3568 | Cattle | Northeastern | 0 | 0 | 0 | 0 | 0 | 0 |
| 3569 | Cattle | Northeastern | 0 | 0 | 0 | 0 | 0 | 0 |
| 3570 | Cattle | Northeastern | 0 | 0 | 0 | 0 | 0 | 0 |
| 3571 | Cattle | Northeastern | 0 | 0 | 0 | 0 | 0 | 0 |
| 3572 | Cattle | Northeastern | 0 | 0 | 0 | 0 | 0 | 0 |
| 3573 | Cattle | Northeastern | 0 | 0 | 0 | 0 | 0 | 0 |
| 3574 | Cattle | Northeastern | 0 | 0 | 0 | 0 | 0 | 0 |
| 3575 | Cattle | Northeastern | 0 | 0 | 0 | 0 | 0 | 0 |
| 3576 | Cattle | Northeastern | 0 | 0 | 0 | 0 | 0 | 0 |
| 3577 | Cattle | Northeastern | 0 | 0 | 0 | 0 | 0 | 0 |
| 3578 | Cattle | Northeastern | 0 | 0 | 0 | 0 | 0 | 0 |
| 3579 | Cattle | Northeastern | 0 | 0 | 0 | 0 | 0 | 0 |
| 3580 | Cattle | Northeastern | 0 | 0 | 0 | 0 | 0 | 0 |
| 3581 | Cattle | Northeastern | 0 | 0 | 0 | 0 | 0 | 0 |
| 3582 | Cattle | Northeastern | 0 | 0 | 0 | 0 | 0 | 0 |
| 3583 | Cattle | Northeastern | 0 | 0 | 0 | 0 | 0 | 0 |
| 3584 | Cattle | Northeastern | 0 | 0 | 0 | 0 | 0 | 0 |
| 3585 | Cattle | Northeastern | 0 | 0 | 0 | 0 | 0 | 0 |
| 3586 | Cattle | Northeastern | 0 | 0 | 0 | 0 | 0 | 0 |
| 3587 | Cattle | Northeastern | 0 | 0 | 0 | 0 | 0 | 0 |
| 3588 | Cattle | Northeastern | 0 | 0 | 0 | 0 | 0 | 0 |
| 3589 | Cattle | Northeastern | 0 | 0 | 0 | 0 | 0 | 0 |
| 3590 | Cattle | Northeastern | 0 | 0 | 0 | 0 | 0 | 0 |
| 3591 | Cattle | Northeastern | 0 | 0 | 0 | 0 | 0 | 0 |
| 3592 | Cattle | Northeastern | 0 | 0 | 0 | 0 | 0 | 0 |
| 3593 | Cattle | Northeastern | 0 | 0 | 0 | 0 | 0 | 0 |
| 3594 | Cattle | Northeastern | 0 | 0 | 0 | 0 | 0 | 0 |
| 3595 | Cattle | Northeastern | 0 | 0 | 0 | 0 | 0 | 0 |
| 3596 | Cattle | Northeastern | 0 | 0 | 0 | 0 | 0 | 0 |
| 3597 | Cattle | Northeastern | 0 | 0 | 0 | 0 | 0 | 0 |
| 3598 | Cattle | Northeastern | 0 | 0 | 0 | 0 | 0 | 0 |
| 3599 | Cattle | Northeastern | 0 | 0 | 0 | 0 | 0 | 0 |

|      |        |              |   |   |   |   |   |   |
|------|--------|--------------|---|---|---|---|---|---|
| 3600 | Cattle | Northeastern | 0 | 0 | 0 | 0 | 0 | 0 |
| 3601 | Cattle | Northeastern | 0 | 0 | 0 | 0 | 0 | 0 |
| 3602 | Cattle | Northeastern | 0 | 0 | 0 | 0 | 0 | 0 |
| 3603 | Cattle | Northeastern | 0 | 0 | 0 | 0 | 0 | 0 |
| 3604 | Cattle | Northeastern | 0 | 0 | 0 | 0 | 0 | 0 |
| 3605 | Cattle | Northeastern | 0 | 0 | 0 | 0 | 0 | 0 |
| 3606 | Cattle | Northeastern | 0 | 0 | 0 | 0 | 0 | 0 |
| 3607 | Cattle | Northeastern | 0 | 0 | 0 | 0 | 0 | 0 |
| 3608 | Cattle | Northeastern | 0 | 0 | 0 | 1 | 0 | 1 |
| 3609 | Cattle | Northeastern | 0 | 0 | 0 | 0 | 0 | 0 |
| 3610 | Cattle | Northeastern | 0 | 0 | 0 | 0 | 0 | 0 |
| 3611 | Cattle | Northeastern | 0 | 0 | 0 | 0 | 0 | 0 |
| 3612 | Cattle | Northeastern | 0 | 0 | 0 | 0 | 0 | 0 |
| 3613 | Cattle | Northeastern | 0 | 0 | 0 | 0 | 0 | 0 |
| 3614 | Cattle | Northeastern | 0 | 0 | 0 | 0 | 0 | 0 |
| 3615 | Cattle | Northeastern | 0 | 0 | 0 | 0 | 0 | 0 |
| 3616 | Cattle | Northeastern | 0 | 0 | 0 | 0 | 0 | 0 |
| 3617 | Cattle | Northeastern | 0 | 0 | 0 | 0 | 0 | 0 |
| 3618 | Cattle | Northeastern | 0 | 0 | 0 | 0 | 0 | 0 |
| 3619 | Cattle | Northeastern | 0 | 0 | 0 | 0 | 0 | 0 |
| 3620 | Cattle | Northeastern | 0 | 0 | 0 | 0 | 0 | 0 |
| 3621 | Cattle | Northeastern | 0 | 0 | 0 | 0 | 0 | 0 |
| 3622 | Cattle | Northeastern | 0 | 0 | 0 | 0 | 0 | 0 |
| 3623 | Cattle | Northeastern | 0 | 0 | 0 | 0 | 0 | 0 |
| 3624 | Cattle | Northeastern | 0 | 0 | 0 | 0 | 0 | 0 |
| 3625 | Cattle | Northeastern | 0 | 0 | 0 | 0 | 0 | 0 |
| 3626 | Cattle | Northeastern | 0 | 0 | 0 | 0 | 0 | 0 |
| 3627 | Cattle | Northeastern | 0 | 0 | 0 | 0 | 0 | 0 |
| 3628 | Cattle | Northeastern | 0 | 0 | 0 | 0 | 0 | 0 |
| 3629 | Cattle | Northeastern | 0 | 0 | 0 | 0 | 0 | 0 |
| 3630 | Cattle | Northeastern | 0 | 0 | 0 | 0 | 0 | 0 |
| 3631 | Cattle | Northeastern | 0 | 0 | 0 | 0 | 0 | 1 |
| 3632 | Cattle | Northeastern | 0 | 0 | 0 | 0 | 0 | 0 |
| 3633 | Cattle | Northeastern | 0 | 0 | 0 | 0 | 0 | 0 |
| 3634 | Cattle | Northeastern | 0 | 0 | 0 | 0 | 0 | 0 |
| 3635 | Cattle | Northeastern | 0 | 0 | 0 | 0 | 0 | 0 |
| 3636 | Cattle | Northeastern | 0 | 0 | 0 | 0 | 0 | 0 |
| 3637 | Cattle | Northeastern | 0 | 0 | 0 | 0 | 0 | 0 |
| 3638 | Cattle | Northeastern | 0 | 0 | 0 | 0 | 0 | 0 |
| 3639 | Cattle | Northeastern | 0 | 0 | 0 | 0 | 0 | 0 |
| 3640 | Cattle | Northeastern | 0 | 0 | 0 | 0 | 0 | 0 |
| 3641 | Cattle | Northeastern | 0 | 0 | 0 | 0 | 0 | 0 |
| 3642 | Cattle | Northeastern | 0 | 0 | 0 | 0 | 0 | 0 |
| 3643 | Cattle | Northeastern | 0 | 0 | 0 | 0 | 0 | 0 |
| 3644 | Cattle | Northeastern | 0 | 0 | 0 | 0 | 0 | 0 |
| 3645 | Cattle | Northeastern | 0 | 0 | 0 | 0 | 0 | 0 |
| 3646 | Cattle | Northeastern | 0 | 0 | 0 | 0 | 0 | 0 |
| 3647 | Cattle | Northeastern | 0 | 0 | 0 | 0 | 0 | 0 |

|      |        |              |   |   |   |   |   |   |
|------|--------|--------------|---|---|---|---|---|---|
| 3648 | Cattle | Northeastern | 0 | 0 | 0 | 0 | 0 | 0 |
| 3649 | Cattle | Northeastern | 0 | 0 | 0 | 0 | 0 | 0 |
| 3650 | Cattle | Northeastern | 0 | 0 | 1 | 0 | 0 | 1 |
| 3651 | Cattle | Northeastern | 0 | 1 | 0 | 0 | 0 | 1 |
| 3652 | Cattle | Northeastern | 0 | 0 | 0 | 0 | 0 | 0 |
| 3653 | Cattle | Northeastern | 0 | 0 | 0 | 0 | 0 | 0 |
| 3654 | Cattle | Northeastern | 0 | 0 | 0 | 0 | 0 | 0 |
| 3655 | Cattle | Northeastern | 0 | 0 | 0 | 0 | 0 | 0 |
| 3656 | Cattle | Northeastern | 0 | 0 | 0 | 0 | 0 | 0 |
| 3657 | Cattle | Northeastern | 0 | 0 | 0 | 0 | 0 | 0 |
| 3658 | Cattle | Northeastern | 0 | 0 | 0 | 0 | 0 | 0 |
| 3659 | Cattle | Northeastern | 0 | 1 | 0 | 0 | 0 | 1 |
| 3660 | Cattle | Northeastern | 0 | 0 | 0 | 0 | 0 | 0 |
| 3661 | Cattle | Northeastern | 0 | 0 | 0 | 0 | 0 | 0 |
| 3662 | Cattle | Northeastern | 0 | 0 | 0 | 0 | 0 | 0 |
| 3663 | Cattle | Northeastern | 0 | 0 | 0 | 0 | 0 | 0 |
| 3664 | Cattle | Northeastern | 0 | 0 | 0 | 0 | 0 | 0 |
| 3665 | Cattle | Northeastern | 0 | 0 | 0 | 0 | 0 | 0 |
| 3666 | Cattle | Northeastern | 0 | 0 | 0 | 0 | 0 | 0 |
| 3667 | Cattle | Northeastern | 0 | 0 | 0 | 0 | 0 | 0 |
| 3668 | Cattle | Northeastern | 0 | 0 | 0 | 0 | 0 | 0 |
| 3669 | Cattle | Northeastern | 0 | 0 | 0 | 0 | 0 | 0 |
| 3670 | Cattle | Northeastern | 0 | 0 | 0 | 0 | 0 | 0 |
| 3671 | Cattle | Northeastern | 0 | 0 | 0 | 0 | 0 | 0 |
| 3672 | Cattle | Northeastern | 0 | 0 | 0 | 0 | 0 | 0 |
| 3673 | Cattle | Northeastern | 0 | 0 | 0 | 0 | 0 | 0 |
| 3674 | Cattle | Northeastern | 0 | 0 | 0 | 0 | 0 | 0 |
| 3675 | Cattle | Northeastern | 0 | 0 | 0 | 0 | 0 | 0 |
| 3676 | Cattle | Northeastern | 0 | 0 | 0 | 0 | 0 | 0 |
| 3677 | Cattle | Northeastern | 0 | 0 | 0 | 0 | 0 | 0 |
| 3678 | Cattle | Northeastern | 0 | 0 | 0 | 0 | 0 | 0 |
| 3679 | Cattle | Northeastern | 0 | 0 | 0 | 1 | 0 | 1 |
| 3680 | Cattle | Northeastern | 0 | 0 | 0 | 0 | 0 | 0 |
| 3681 | Cattle | Northeastern | 0 | 0 | 0 | 0 | 0 | 0 |
| 3682 | Cattle | Northeastern | 0 | 0 | 0 | 0 | 0 | 0 |
| 3683 | Cattle | Northeastern | 0 | 0 | 0 | 0 | 0 | 0 |
| 3684 | Cattle | Northeastern | 0 | 0 | 0 | 0 | 0 | 0 |
| 3685 | Cattle | Central      | 0 | 0 | 0 | 0 | 0 | 0 |
| 3686 | Cattle | Central      | 0 | 0 | 0 | 0 | 0 | 0 |
| 3687 | Cattle | Central      | 0 | 0 | 0 | 0 | 0 | 0 |
| 3688 | Cattle | Central      | 0 | 1 | 0 | 0 | 0 | 1 |
| 3689 | Cattle | Central      | 0 | 0 | 0 | 0 | 0 | 0 |
| 3690 | Cattle | Central      | 0 | 0 | 0 | 0 | 0 | 0 |
| 3691 | Cattle | Central      | 0 | 0 | 0 | 0 | 0 | 0 |
| 3692 | Cattle | Central      | 0 | 0 | 0 | 0 | 0 | 1 |
| 3693 | Cattle | Central      | 0 | 0 | 0 | 0 | 0 | 1 |
| 3694 | Cattle | Central      | 0 | 1 | 0 | 0 | 0 | 1 |
| 3695 | Cattle | Central      | 0 | 1 | 0 | 0 | 0 | 1 |

|      |        |         |   |   |   |   |   |   |
|------|--------|---------|---|---|---|---|---|---|
| 3696 | Cattle | Central | 0 | 0 | 0 | 0 | 0 | 0 |
| 3697 | Cattle | Central | 0 | 1 | 0 | 0 | 0 | 1 |
| 3698 | Cattle | Central | 0 | 0 | 0 | 0 | 0 | 0 |
| 3699 | Cattle | Central | 0 | 0 | 0 | 0 | 0 | 0 |
| 3700 | Cattle | Central | 0 | 0 | 0 | 0 | 0 | 0 |
| 3701 | Cattle | Central | 0 | 0 | 0 | 0 | 0 | 0 |
| 3702 | Cattle | Central | 0 | 0 | 0 | 0 | 0 | 0 |
| 3703 | Cattle | Eastern | 0 | 0 | 0 | 0 | 0 | 0 |
| 3704 | Cattle | Eastern | 0 | 0 | 0 | 0 | 0 | 0 |
| 3705 | Cattle | Eastern | 0 | 0 | 0 | 0 | 0 | 0 |
| 3706 | Cattle | Eastern | 0 | 0 | 0 | 0 | 0 | 0 |
| 3707 | Cattle | Eastern | 0 | 0 | 1 | 1 | 0 | 1 |
| 3708 | Cattle | Eastern | 0 | 0 | 0 | 0 | 0 | 0 |
| 3709 | Cattle | Eastern | 0 | 0 | 0 | 0 | 0 | 0 |
| 3710 | Cattle | Eastern | 0 | 0 | 0 | 0 | 0 | 0 |
| 3711 | Cattle | Eastern | 0 | 0 | 0 | 0 | 0 | 0 |
| 3712 | Cattle | Eastern | 0 | 0 | 0 | 0 | 0 | 0 |
| 3713 | Cattle | Eastern | 0 | 0 | 0 | 0 | 0 | 0 |
| 3714 | Cattle | Eastern | 0 | 0 | 0 | 0 | 0 | 0 |
| 3715 | Cattle | Eastern | 0 | 0 | 0 | 0 | 0 | 0 |
| 3716 | Cattle | Eastern | 0 | 0 | 0 | 0 | 0 | 0 |
| 3717 | Cattle | Central | 0 | 0 | 0 | 0 | 0 | 0 |
| 3718 | Cattle | Central | 0 | 0 | 0 | 0 | 0 | 0 |
| 3719 | Cattle | Central | 0 | 0 | 0 | 0 | 0 | 0 |
| 3720 | Cattle | Central | 1 | 0 | 0 | 0 | 0 | 1 |
| 3721 | Cattle | Central | 0 | 1 | 0 | 0 | 0 | 1 |
| 3722 | Cattle | Central | 0 | 0 | 0 | 0 | 0 | 0 |
| 3723 | Cattle | Central | 0 | 0 | 0 | 0 | 0 | 0 |
| 3724 | Cattle | Central | 0 | 0 | 0 | 0 | 0 | 0 |
| 3725 | Cattle | Central | 0 | 0 | 0 | 0 | 0 | 0 |
| 3726 | Cattle | Central | 0 | 0 | 0 | 0 | 0 | 0 |
| 3727 | Cattle | Central | 0 | 0 | 0 | 0 | 0 | 0 |
| 3728 | Cattle | Central | 0 | 0 | 0 | 0 | 0 | 0 |
| 3729 | Cattle | Central | 0 | 0 | 0 | 0 | 0 | 0 |
| 3730 | Cattle | Central | 0 | 0 | 0 | 0 | 0 | 0 |
| 3731 | Cattle | Central | 0 | 0 | 0 | 0 | 0 | 0 |
| 3732 | Cattle | Central | 0 | 0 | 0 | 0 | 0 | 0 |
| 3733 | Cattle | Central | 0 | 0 | 0 | 0 | 0 | 0 |
| 3734 | Cattle | Central | 0 | 0 | 0 | 0 | 0 | 0 |
| 3735 | Cattle | Central | 0 | 0 | 0 | 0 | 0 | 0 |
| 3736 | Cattle | Central | 0 | 0 | 0 | 0 | 0 | 0 |
| 3737 | Cattle | Central | 0 | 0 | 0 | 0 | 0 | 0 |
| 3738 | Cattle | Central | 0 | 0 | 0 | 0 | 0 | 0 |
| 3739 | Cattle | Central | 0 | 0 | 0 | 0 | 0 | 0 |
| 3740 | Cattle | Central | 0 | 0 | 0 | 0 | 0 | 0 |
| 3741 | Cattle | Central | 0 | 0 | 0 | 0 | 0 | 0 |
| 3742 | Cattle | Eastern | 0 | 0 | 0 | 0 | 0 | 0 |
| 3743 | Cattle | Eastern | 0 | 0 | 0 | 0 | 0 | 0 |

|      |        |              |   |   |   |   |   |   |
|------|--------|--------------|---|---|---|---|---|---|
| 3744 | Cattle | Eastern      | 0 | 0 | 0 | 0 | 0 | 0 |
| 3745 | Cattle | Eastern      | 0 | 0 | 0 | 0 | 0 | 0 |
| 3746 | Cattle | Eastern      | 0 | 0 | 0 | 0 | 0 | 0 |
| 3747 | Cattle | Eastern      | 0 | 0 | 0 | 0 | 0 | 0 |
| 3748 | Cattle | Northeastern | 0 | 0 | 0 | 0 | 0 | 0 |
| 3749 | Cattle | Northeastern | 0 | 0 | 0 | 0 | 0 | 0 |
| 3750 | Cattle | Northeastern | 0 | 0 | 0 | 0 | 0 | 0 |
| 3751 | Cattle | Northeastern | 0 | 0 | 0 | 0 | 0 | 0 |
| 3752 | Cattle | Northeastern | 0 | 0 | 0 | 0 | 0 | 0 |
| 3753 | Cattle | Northeastern | 0 | 1 | 0 | 0 | 0 | 1 |
| 3754 | Cattle | Northeastern | 0 | 0 | 0 | 0 | 0 | 0 |
| 3755 | Cattle | Northeastern | 0 | 0 | 0 | 0 | 0 | 0 |
| 3756 | Cattle | Northeastern | 0 | 0 | 0 | 0 | 0 | 0 |
| 3757 | Cattle | Northeastern | 0 | 0 | 0 | 0 | 0 | 0 |
| 3758 | Cattle | Northeastern | 0 | 0 | 0 | 0 | 0 | 0 |
| 3759 | Cattle | Northeastern | 0 | 0 | 0 | 0 | 0 | 0 |
| 3760 | Cattle | Northeastern | 0 | 0 | 0 | 0 | 0 | 0 |
| 3761 | Cattle | Northeastern | 0 | 0 | 0 | 0 | 0 | 0 |
| 3762 | Cattle | Northeastern | 0 | 0 | 0 | 0 | 0 | 0 |
| 3763 | Cattle | Northeastern | 0 | 0 | 0 | 0 | 0 | 0 |
| 3764 | Cattle | Northeastern | 0 | 0 | 0 | 0 | 0 | 0 |
| 3765 | Cattle | Northeastern | 0 | 0 | 0 | 0 | 0 | 0 |
| 3766 | Cattle | Northeastern | 0 | 0 | 0 | 0 | 0 | 0 |
| 3767 | Cattle | Northeastern | 0 | 0 | 0 | 0 | 0 | 0 |
| 3768 | Cattle | Northeastern | 0 | 0 | 0 | 0 | 0 | 0 |
| 3769 | Cattle | Northeastern | 0 | 0 | 0 | 0 | 0 | 0 |
| 3770 | Cattle | Northeastern | 0 | 0 | 0 | 0 | 0 | 0 |
| 3771 | Cattle | Northeastern | 0 | 0 | 0 | 0 | 0 | 0 |
| 3772 | Cattle | Northeastern | 0 | 0 | 0 | 0 | 0 | 0 |
| 3773 | Cattle | Eastern      | 0 | 0 | 0 | 0 | 0 | 0 |
| 3774 | Cattle | Eastern      | 0 | 0 | 0 | 0 | 0 | 0 |
| 3775 | Cattle | Eastern      | 0 | 0 | 0 | 0 | 0 | 0 |
| 3776 | Cattle | Northeastern | 0 | 0 | 0 | 0 | 0 | 0 |
| 3777 | Cattle | Northeastern | 0 | 0 | 0 | 0 | 0 | 0 |
| 3778 | Cattle | Northeastern | 0 | 0 | 0 | 0 | 0 | 0 |
| 3779 | Cattle | Northeastern | 0 | 1 | 0 | 0 | 0 | 1 |
| 3780 | Cattle | Northeastern | 0 | 0 | 0 | 0 | 0 | 0 |
| 3781 | Cattle | Northeastern | 0 | 0 | 0 | 0 | 0 | 0 |
| 3782 | Cattle | Northeastern | 0 | 0 | 0 | 0 | 0 | 0 |
| 3783 | Cattle | Northeastern | 0 | 0 | 0 | 0 | 0 | 0 |
| 3784 | Cattle | Northeastern | 0 | 0 | 0 | 0 | 0 | 0 |
| 3785 | Cattle | Northeastern | 0 | 0 | 0 | 0 | 0 | 0 |
| 3786 | Cattle | Northeastern | 0 | 0 | 0 | 0 | 0 | 0 |
| 3787 | Cattle | Northeastern | 0 | 0 | 0 | 0 | 0 | 0 |
| 3788 | Cattle | Central      | 0 | 0 | 0 | 0 | 0 | 0 |
| 3789 | Cattle | Central      | 0 | 0 | 0 | 0 | 0 | 0 |
| 3790 | Cattle | Central      | 0 | 0 | 0 | 0 | 0 | 0 |
| 3791 | Cattle | Central      | 0 | 0 | 0 | 0 | 0 | 0 |

|      |        |              |   |   |   |   |   |   |
|------|--------|--------------|---|---|---|---|---|---|
| 3792 | Cattle | Central      | 0 | 0 | 0 | 0 | 0 | 0 |
| 3793 | Cattle | Central      | 0 | 0 | 0 | 0 | 0 | 0 |
| 3794 | Cattle | Central      | 0 | 0 | 0 | 0 | 0 | 0 |
| 3795 | Cattle | Central      | 0 | 0 | 0 | 0 | 0 | 0 |
| 3796 | Cattle | Central      | 0 | 0 | 0 | 0 | 0 | 0 |
| 3797 | Cattle | Central      | 0 | 0 | 0 | 0 | 0 | 0 |
| 3798 | Cattle | Central      | 0 | 0 | 0 | 0 | 0 | 0 |
| 3799 | Cattle | Central      | 0 | 0 | 0 | 0 | 0 | 0 |
| 3800 | Cattle | Central      | 0 | 0 | 0 | 0 | 0 | 0 |
| 3801 | Cattle | Central      | 0 | 0 | 0 | 0 | 0 | 0 |
| 3802 | Cattle | Central      | 0 | 0 | 0 | 0 | 0 | 0 |
| 3803 | Cattle | Central      | 0 | 0 | 0 | 0 | 0 | 0 |
| 3804 | Cattle | Central      | 0 | 0 | 0 | 0 | 0 | 0 |
| 3805 | Cattle | Central      | 0 | 0 | 0 | 0 | 0 | 0 |
| 3806 | Cattle | Central      | 0 | 0 | 0 | 0 | 0 | 0 |
| 3807 | Cattle | Central      | 0 | 0 | 0 | 0 | 0 | 0 |
| 3808 | Cattle | Central      | 0 | 0 | 0 | 0 | 0 | 0 |
| 3809 | Cattle | Central      | 0 | 0 | 0 | 0 | 0 | 0 |
| 3810 | Cattle | Central      | 0 | 0 | 0 | 0 | 0 | 0 |
| 3811 | Cattle | Central      | 0 | 0 | 0 | 0 | 0 | 0 |
| 3812 | Cattle | Central      | 0 | 0 | 0 | 0 | 0 | 0 |
| 3813 | Cattle | Central      | 0 | 0 | 0 | 0 | 0 | 0 |
| 3814 | Cattle | Central      | 0 | 0 | 0 | 0 | 0 | 0 |
| 3815 | Cattle | Central      | 0 | 0 | 0 | 0 | 0 | 0 |
| 3816 | Cattle | Central      | 0 | 0 | 0 | 0 | 0 | 0 |
| 3817 | Cattle | Central      | 0 | 0 | 0 | 0 | 0 | 0 |
| 3818 | Cattle | Central      | 0 | 0 | 0 | 0 | 0 | 0 |
| 3819 | Cattle | Central      | 0 | 0 | 0 | 0 | 0 | 0 |
| 3820 | Cattle | Central      | 0 | 0 | 0 | 0 | 0 | 0 |
| 3821 | Cattle | Central      | 0 | 0 | 0 | 0 | 0 | 0 |
| 3822 | Cattle | Central      | 0 | 0 | 0 | 0 | 0 | 0 |
| 3823 | Cattle | Central      | 0 | 0 | 0 | 0 | 0 | 0 |
| 3824 | Cattle | Central      | 0 | 0 | 0 | 0 | 0 | 0 |
| 3825 | Cattle | Central      | 0 | 0 | 0 | 0 | 0 | 0 |
| 3826 | Cattle | Central      | 0 | 0 | 0 | 0 | 0 | 0 |
| 3827 | Cattle | Central      | 0 | 0 | 0 | 0 | 0 | 0 |
| 3828 | Cattle | Central      | 0 | 0 | 0 | 0 | 0 | 0 |
| 3829 | Cattle | Central      | 0 | 0 | 0 | 0 | 0 | 0 |
| 3830 | Cattle | Central      | 0 | 0 | 0 | 0 | 0 | 0 |
| 3831 | Cattle | Central      | 0 | 0 | 0 | 0 | 0 | 0 |
| 3832 | Cattle | Central      | 0 | 0 | 0 | 0 | 0 | 0 |
| 3833 | Cattle | Central      | 0 | 0 | 0 | 0 | 0 | 0 |
| 3834 | Cattle | Central      | 0 | 0 | 0 | 0 | 0 | 0 |
| 3835 | Cattle | Northeastern | 0 | 0 | 0 | 0 | 0 | 0 |
| 3836 | Cattle | Northeastern | 0 | 0 | 0 | 0 | 0 | 0 |
| 3837 | Cattle | Northeastern | 0 | 0 | 0 | 0 | 0 | 0 |
| 3838 | Cattle | Northeastern | 0 | 0 | 0 | 0 | 0 | 0 |
| 3839 | Cattle | Northeastern | 0 | 0 | 0 | 1 | 0 | 1 |



|      |        |              |   |   |   |   |   |   |
|------|--------|--------------|---|---|---|---|---|---|
| 3840 | Cattle | Northeastern | 0 | 0 | 0 | 0 | 0 | 0 |
| 3841 | Cattle | Northeastern | 0 | 0 | 0 | 0 | 0 | 0 |
| 3842 | Cattle | Northeastern | 0 | 0 | 0 | 0 | 0 | 0 |
| 3843 | Cattle | Northeastern | 0 | 0 | 1 | 1 | 0 | 1 |
| 3844 | Cattle | Central      | 0 | 0 | 0 | 0 | 0 | 0 |
| 3845 | Cattle | Central      | 0 | 0 | 0 | 0 | 0 | 0 |
| 3846 | Cattle | Central      | 0 | 0 | 1 | 0 | 0 | 1 |
| 3847 | Cattle | Central      | 0 | 0 | 0 | 0 | 0 | 0 |
| 3848 | Cattle | Central      | 0 | 0 | 0 | 0 | 0 | 0 |
| 3849 | Cattle | Central      | 0 | 0 | 0 | 0 | 0 | 0 |
| 3850 | Cattle | Central      | 0 | 0 | 0 | 0 | 0 | 0 |
| 3851 | Cattle | Central      | 0 | 0 | 0 | 0 | 0 | 0 |
| 3852 | Cattle | Central      | 0 | 0 | 0 | 0 | 0 | 0 |
| 3853 | Cattle | Central      | 0 | 0 | 0 | 0 | 0 | 0 |
| 3854 | Cattle | Central      | 0 | 0 | 0 | 0 | 0 | 0 |
| 3855 | Cattle | Central      | 0 | 0 | 0 | 0 | 0 | 0 |
| 3856 | Cattle | Central      | 0 | 0 | 0 | 0 | 0 | 0 |
| 3857 | Cattle | Central      | 0 | 0 | 0 | 0 | 0 | 0 |
| 3858 | Cattle | Central      | 0 | 0 | 0 | 0 | 0 | 0 |
| 3859 | Cattle | Central      | 0 | 0 | 0 | 0 | 0 | 0 |
| 3860 | Cattle | Central      | 0 | 0 | 0 | 0 | 0 | 0 |
| 3861 | Cattle | Central      | 0 | 0 | 0 | 0 | 0 | 0 |
| 3862 | Cattle | Central      | 0 | 0 | 0 | 0 | 0 | 0 |
| 3863 | Cattle | Central      | 0 | 0 | 0 | 0 | 0 | 0 |
| 3864 | Cattle | Central      | 0 | 0 | 0 | 0 | 0 | 0 |
| 3865 | Cattle | Central      | 0 | 0 | 0 | 0 | 0 | 0 |
| 3866 | Cattle | Central      | 0 | 0 | 0 | 0 | 0 | 0 |
| 3867 | Cattle | Central      | 0 | 0 | 0 | 0 | 0 | 0 |
| 3868 | Cattle | Central      | 0 | 0 | 0 | 1 | 0 | 1 |
| 3869 | Cattle | Central      | 0 | 0 | 0 | 0 | 0 | 0 |
| 3870 | Cattle | Central      | 0 | 0 | 0 | 0 | 0 | 0 |
| 3871 | Cattle | Central      | 0 | 0 | 0 | 0 | 0 | 0 |
| 3872 | Cattle | Central      | 0 | 0 | 0 | 0 | 0 | 0 |
| 3873 | Cattle | Central      | 0 | 0 | 0 | 0 | 0 | 0 |
| 3874 | Cattle | Central      | 0 | 0 | 0 | 0 | 0 | 0 |
| 3875 | Cattle | Central      | 0 | 0 | 0 | 0 | 0 | 0 |
| 3876 | Cattle | Central      | 0 | 0 | 0 | 0 | 0 | 0 |
| 3877 | Cattle | Central      | 0 | 0 | 0 | 0 | 0 | 0 |
| 3878 | Cattle | Central      | 0 | 0 | 0 | 0 | 0 | 0 |
| 3879 | Cattle | Central      | 0 | 0 | 1 | 1 | 0 | 1 |
| 3880 | Cattle | Central      | 0 | 0 | 0 | 0 | 0 | 0 |
| 3881 | Cattle | Central      | 0 | 0 | 0 | 0 | 0 | 0 |
| 3882 | Cattle | Central      | 0 | 0 | 0 | 0 | 0 | 0 |
| 3883 | Cattle | Central      | 0 | 0 | 0 | 1 | 0 | 1 |
| 3884 | Cattle | Central      | 0 | 0 | 0 | 1 | 0 | 1 |
| 3885 | Cattle | Central      | 0 | 0 | 0 | 1 | 0 | 1 |
| 3886 | Cattle | Central      | 0 | 1 | 0 | 1 | 0 | 1 |
| 3887 | Cattle | Central      | 0 | 1 | 0 | 0 | 0 | 1 |

|      |        |              |   |   |   |   |   |   |
|------|--------|--------------|---|---|---|---|---|---|
| 3888 | Cattle | Central      | 0 | 1 | 0 | 1 | 0 | 1 |
| 3889 | Cattle | Central      | 0 | 0 | 0 | 0 | 0 | 0 |
| 3890 | Cattle | Central      | 0 | 1 | 0 | 1 | 0 | 1 |
| 3891 | Cattle | Central      | 0 | 0 | 0 | 0 | 0 | 0 |
| 3892 | Cattle | Central      | 0 | 0 | 0 | 1 | 0 | 1 |
| 3893 | Cattle | Central      | 0 | 1 | 0 | 0 | 0 | 1 |
| 3894 | Cattle | Central      | 0 | 1 | 0 | 1 | 0 | 1 |
| 3895 | Cattle | Central      | 0 | 1 | 1 | 1 | 0 | 1 |
| 3896 | Cattle | Central      | 0 | 0 | 0 | 0 | 0 | 0 |
| 3897 | Cattle | Central      | 0 | 0 | 0 | 0 | 0 | 0 |
| 3898 | Cattle | Southern     | 0 | 0 | 0 | 0 | 0 | 0 |
| 3899 | Cattle | Southern     | 0 | 0 | 0 | 0 | 0 | 0 |
| 3900 | Cattle | Southern     | 0 | 0 | 1 | 1 | 0 | 1 |
| 3901 | Cattle | Southern     | 0 | 0 | 0 | 0 | 0 | 0 |
| 3902 | Cattle | Central      | 0 | 0 | 0 | 0 | 0 | 0 |
| 3903 | Cattle | Central      | 0 | 0 | 0 | 1 | 0 | 1 |
| 3904 | Cattle | Central      | 0 | 0 | 0 | 0 | 0 | 0 |
| 3905 | Cattle | Central      | 0 | 0 | 0 | 0 | 0 | 0 |
| 3906 | Cattle | Central      | 0 | 0 | 0 | 0 | 0 | 0 |
| 3907 | Cattle | Central      | 0 | 0 | 0 | 0 | 0 | 0 |
| 3908 | Cattle | Central      | 0 | 0 | 0 | 0 | 0 | 0 |
| 3909 | Cattle | Central      | 0 | 0 | 0 | 0 | 0 | 0 |
| 3910 | Cattle | Central      | 0 | 0 | 0 | 0 | 0 | 0 |
| 3911 | Cattle | Central      | 0 | 0 | 0 | 0 | 0 | 0 |
| 3912 | Cattle | Central      | 0 | 0 | 0 | 0 | 0 | 0 |
| 3913 | Cattle | Central      | 0 | 0 | 0 | 0 | 0 | 0 |
| 3914 | Cattle | Central      | 0 | 0 | 0 | 0 | 0 | 0 |
| 3915 | Cattle | Central      | 0 | 0 | 0 | 0 | 0 | 0 |
| 3916 | Cattle | Central      | 0 | 0 | 0 | 0 | 0 | 0 |
| 3917 | Cattle | Central      | 0 | 0 | 1 | 1 | 0 | 1 |
| 3918 | Cattle | Central      | 0 | 0 | 1 | 1 | 0 | 1 |
| 3919 | Cattle | Central      | 0 | 0 | 1 | 1 | 0 | 1 |
| 3920 | Cattle | Central      | 0 | 0 | 1 | 1 | 0 | 1 |
| 3921 | Cattle | Central      | 0 | 0 | 0 | 0 | 0 | 0 |
| 3922 | Cattle | Central      | 0 | 0 | 0 | 0 | 0 | 0 |
| 3923 | Cattle | Central      | 0 | 0 | 1 | 1 | 0 | 1 |
| 3924 | Cattle | Central      | 0 | 0 | 0 | 0 | 0 | 0 |
| 3925 | Cattle | Central      | 0 | 0 | 0 | 1 | 0 | 1 |
| 3926 | Cattle | Central      | 0 | 0 | 0 | 0 | 0 | 0 |
| 3927 | Cattle | Northeastern | 0 | 0 | 0 | 0 | 0 | 0 |
| 3928 | Cattle | Northeastern | 0 | 0 | 0 | 0 | 0 | 0 |
| 3929 | Cattle | Northeastern | 0 | 0 | 0 | 0 | 0 | 0 |
| 3930 | Cattle | Northeastern | 0 | 0 | 0 | 0 | 0 | 0 |
| 3931 | Cattle | Northeastern | 0 | 0 | 0 | 0 | 0 | 0 |
| 3932 | Cattle | Northeastern | 0 | 0 | 0 | 0 | 0 | 0 |
| 3933 | Cattle | Northeastern | 0 | 0 | 0 | 0 | 0 | 0 |
| 3934 | Cattle | Northeastern | 0 | 0 | 0 | 1 | 0 | 1 |
| 3935 | Cattle | Northeastern | 0 | 0 | 0 | 0 | 0 | 0 |

|      |        |              |   |   |   |   |   |   |
|------|--------|--------------|---|---|---|---|---|---|
| 3936 | Cattle | Northeastern | 0 | 0 | 0 | 0 | 0 | 0 |
| 3937 | Cattle | Northeastern | 0 | 0 | 0 | 0 | 0 | 0 |
| 3938 | Cattle | Northeastern | 0 | 0 | 0 | 0 | 0 | 0 |
| 3939 | Cattle | Northeastern | 0 | 0 | 0 | 0 | 0 | 0 |
| 3940 | Cattle | Northeastern | 0 | 0 | 0 | 0 | 0 | 0 |
| 3941 | Cattle | Northeastern | 0 | 0 | 0 | 0 | 0 | 0 |
| 3942 | Cattle | Northeastern | 0 | 0 | 0 | 0 | 0 | 0 |
| 3943 | Cattle | Northeastern | 0 | 0 | 0 | 0 | 0 | 0 |
| 3944 | Cattle | Northeastern | 0 | 0 | 0 | 0 | 0 | 0 |
| 3945 | Cattle | Northeastern | 0 | 0 | 0 | 0 | 0 | 0 |
| 3946 | Cattle | Northeastern | 0 | 0 | 0 | 0 | 0 | 0 |
| 3947 | Cattle | Northeastern | 0 | 0 | 0 | 0 | 0 | 0 |
| 3948 | Cattle | Northeastern | 0 | 0 | 0 | 0 | 0 | 0 |
| 3949 | Cattle | Northeastern | 0 | 0 | 0 | 0 | 0 | 0 |
| 3950 | Cattle | Northeastern | 0 | 0 | 0 | 1 | 0 | 1 |
| 3951 | Cattle | Northeastern | 0 | 0 | 0 | 1 | 0 | 1 |
| 3952 | Cattle | Northeastern | 0 | 0 | 0 | 0 | 0 | 0 |
| 3953 | Cattle | Northeastern | 0 | 0 | 0 | 0 | 0 | 0 |
| 3954 | Cattle | Northeastern | 0 | 0 | 0 | 0 | 0 | 0 |
| 3955 | Cattle | Northeastern | 0 | 0 | 0 | 0 | 0 | 0 |
| 3956 | Cattle | Northeastern | 0 | 0 | 0 | 0 | 0 | 0 |
| 3957 | Cattle | Northeastern | 0 | 0 | 0 | 0 | 0 | 0 |
| 3958 | Cattle | Northeastern | 0 | 0 | 0 | 0 | 0 | 0 |
| 3959 | Cattle | Northeastern | 0 | 0 | 0 | 0 | 0 | 0 |
| 3960 | Cattle | Northeastern | 0 | 0 | 0 | 0 | 0 | 0 |
| 3961 | Cattle | Northeastern | 0 | 0 | 0 | 0 | 0 | 0 |
| 3962 | Cattle | Northeastern | 0 | 0 | 0 | 0 | 0 | 0 |
| 3963 | Cattle | Northeastern | 0 | 0 | 0 | 0 | 0 | 0 |
| 3964 | Cattle | Northeastern | 0 | 0 | 0 | 0 | 0 | 0 |
| 3965 | Cattle | Northeastern | 0 | 0 | 0 | 0 | 0 | 0 |
| 3966 | Cattle | Northeastern | 0 | 0 | 0 | 0 | 0 | 0 |
| 3967 | Cattle | Northeastern | 0 | 0 | 0 | 0 | 0 | 0 |
| 3968 | Cattle | Northeastern | 0 | 0 | 0 | 0 | 0 | 0 |
| 3969 | Cattle | Northeastern | 0 | 0 | 0 | 0 | 0 | 0 |
| 3970 | Cattle | Northeastern | 0 | 0 | 0 | 0 | 0 | 0 |
| 3971 | Cattle | Northeastern | 0 | 0 | 0 | 0 | 0 | 0 |
| 3972 | Cattle | Northeastern | 0 | 0 | 0 | 0 | 0 | 0 |
| 3973 | Cattle | Northeastern | 0 | 0 | 0 | 0 | 0 | 0 |
| 3974 | Cattle | Northeastern | 0 | 0 | 0 | 0 | 0 | 0 |
| 3975 | Cattle | Northeastern | 0 | 0 | 0 | 0 | 0 | 0 |
| 3976 | Cattle | Northeastern | 0 | 0 | 0 | 0 | 0 | 0 |
| 3977 | Cattle | Northeastern | 0 | 0 | 0 | 0 | 0 | 0 |
| 3978 | Cattle | Northeastern | 0 | 0 | 0 | 0 | 0 | 0 |
| 3979 | Cattle | Northeastern | 0 | 0 | 0 | 0 | 0 | 0 |
| 3980 | Cattle | Northeastern | 0 | 0 | 0 | 0 | 0 | 0 |
| 3981 | Cattle | Northeastern | 0 | 0 | 0 | 0 | 0 | 0 |
| 3982 | Cattle | Northeastern | 0 | 0 | 0 | 0 | 0 | 0 |
| 3983 | Cattle | Northeastern | 0 | 0 | 0 | 0 | 0 | 0 |

|      |        |              |   |   |   |   |   |   |
|------|--------|--------------|---|---|---|---|---|---|
| 3984 | Cattle | Northeastern | 0 | 0 | 0 | 0 | 0 | 0 |
| 3985 | Cattle | Northeastern | 0 | 0 | 0 | 0 | 0 | 0 |
| 3986 | Cattle | Eastern      | 0 | 0 | 0 | 0 | 0 | 0 |
| 3987 | Cattle | Eastern      | 0 | 0 | 0 | 0 | 0 | 0 |
| 3988 | Cattle | Eastern      | 0 | 0 | 0 | 0 | 0 | 0 |
| 3989 | Cattle | Eastern      | 0 | 0 | 0 | 0 | 0 | 0 |
| 3990 | Cattle | Eastern      | 0 | 0 | 0 | 0 | 0 | 0 |
| 3991 | Cattle | Eastern      | 0 | 0 | 0 | 0 | 0 | 0 |
| 3992 | Cattle | Eastern      | 0 | 0 | 0 | 0 | 0 | 0 |
| 3993 | Cattle | Eastern      | 0 | 0 | 0 | 0 | 0 | 0 |
| 3994 | Cattle | Eastern      | 0 | 0 | 0 | 0 | 0 | 0 |
| 3995 | Cattle | Eastern      | 0 | 0 | 0 | 0 | 0 | 0 |
| 3996 | Cattle | Eastern      | 0 | 0 | 0 | 0 | 0 | 0 |
| 3997 | Cattle | Eastern      | 0 | 0 | 0 | 0 | 0 | 0 |
| 3998 | Cattle | Eastern      | 0 | 0 | 0 | 0 | 0 | 0 |
| 3999 | Cattle | Eastern      | 0 | 0 | 0 | 0 | 0 | 0 |
| 4000 | Cattle | Eastern      | 0 | 0 | 0 | 0 | 0 | 0 |
| 4001 | Cattle | Eastern      | 0 | 0 | 0 | 0 | 0 | 0 |
| 4002 | Cattle | Eastern      | 0 | 0 | 0 | 0 | 0 | 0 |
| 4003 | Cattle | Eastern      | 0 | 0 | 0 | 0 | 0 | 0 |
| 4004 | Cattle | Eastern      | 0 | 0 | 0 | 0 | 0 | 0 |
| 4005 | Cattle | Eastern      | 0 | 0 | 0 | 0 | 0 | 0 |
| 4006 | Cattle | Eastern      | 0 | 0 | 0 | 0 | 0 | 0 |
| 4007 | Cattle | Eastern      | 0 | 0 | 0 | 0 | 0 | 0 |
| 4008 | Cattle | Eastern      | 0 | 0 | 0 | 0 | 0 | 0 |
| 4009 | Cattle | Eastern      | 0 | 0 | 0 | 0 | 0 | 0 |
| 4010 | Cattle | Eastern      | 0 | 0 | 0 | 0 | 0 | 0 |
| 4011 | Cattle | Eastern      | 0 | 0 | 0 | 0 | 0 | 0 |
| 4012 | Cattle | Eastern      | 0 | 0 | 0 | 0 | 0 | 0 |
| 4013 | Cattle | Eastern      | 0 | 0 | 0 | 0 | 0 | 0 |
| 4014 | Cattle | Eastern      | 0 | 0 | 0 | 0 | 0 | 0 |
| 4015 | Cattle | Eastern      | 0 | 0 | 0 | 0 | 0 | 0 |
| 4016 | Cattle | Northeastern | 0 | 0 | 0 | 0 | 0 | 0 |
| 4017 | Cattle | Northeastern | 0 | 0 | 0 | 0 | 0 | 0 |
| 4018 | Cattle | Northeastern | 0 | 0 | 1 | 1 | 0 | 1 |
| 4019 | Cattle | Northeastern | 0 | 0 | 0 | 0 | 0 | 0 |
| 4020 | Cattle | Northeastern | 0 | 0 | 0 | 0 | 0 | 0 |
| 4021 | Cattle | Northeastern | 0 | 0 | 0 | 0 | 0 | 0 |
| 4022 | Cattle | Northeastern | 0 | 0 | 0 | 0 | 0 | 0 |
| 4023 | Cattle | Northeastern | 0 | 0 | 0 | 0 | 0 | 0 |
| 4024 | Cattle | Northeastern | 0 | 0 | 0 | 0 | 0 | 0 |
| 4025 | Cattle | Northeastern | 0 | 0 | 0 | 0 | 0 | 0 |
| 4026 | Cattle | Northeastern | 0 | 0 | 0 | 0 | 0 | 0 |
| 4027 | Cattle | Northeastern | 0 | 0 | 0 | 1 | 0 | 1 |
| 4028 | Cattle | Northeastern | 0 | 0 | 0 | 0 | 0 | 0 |
| 4029 | Cattle | Northeastern | 0 | 0 | 0 | 0 | 0 | 0 |
| 4030 | Cattle | Northeastern | 0 | 0 | 0 | 0 | 0 | 0 |
| 4031 | Cattle | Eastern      | 0 | 0 | 0 | 0 | 0 | 0 |

|      |        |         |   |   |   |   |   |   |
|------|--------|---------|---|---|---|---|---|---|
| 4032 | Cattle | Eastern | 0 | 0 | 0 | 0 | 0 | 0 |
| 4033 | Cattle | Eastern | 0 | 0 | 1 | 1 | 0 | 1 |
| 4034 | Cattle | Eastern | 0 | 0 | 0 | 0 | 0 | 0 |
| 4035 | Cattle | Eastern | 0 | 0 | 0 | 0 | 0 | 0 |
| 4036 | Cattle | Eastern | 0 | 0 | 0 | 0 | 0 | 0 |
| 4037 | Cattle | Eastern | 0 | 0 | 0 | 0 | 0 | 0 |
| 4038 | Cattle | Eastern | 0 | 0 | 0 | 0 | 0 | 0 |
| 4039 | Cattle | Eastern | 0 | 0 | 0 | 0 | 0 | 0 |
| 4040 | Cattle | Eastern | 0 | 0 | 0 | 0 | 0 | 0 |
| 4041 | Cattle | Eastern | 0 | 0 | 0 | 0 | 0 | 0 |
| 4042 | Cattle | Eastern | 0 | 0 | 0 | 0 | 0 | 0 |
| 4043 | Cattle | Eastern | 0 | 0 | 0 | 0 | 0 | 0 |
| 4044 | Cattle | Eastern | 0 | 0 | 0 | 0 | 0 | 0 |
| 4045 | Cattle | Eastern | 0 | 0 | 0 | 0 | 0 | 0 |
| 4046 | Cattle | Eastern | 0 | 0 | 0 | 0 | 0 | 0 |
| 4047 | Cattle | Eastern | 0 | 0 | 0 | 0 | 0 | 0 |
| 4048 | Cattle | Eastern | 0 | 0 | 0 | 0 | 0 | 0 |
| 4049 | Cattle | Eastern | 0 | 0 | 0 | 0 | 0 | 0 |
| 4050 | Cattle | Eastern | 0 | 0 | 0 | 0 | 0 | 0 |
| 4051 | Cattle | Eastern | 0 | 0 | 0 | 0 | 0 | 0 |
| 4052 | Cattle | Eastern | 0 | 0 | 0 | 0 | 0 | 0 |
| 4053 | Cattle | Eastern | 0 | 0 | 0 | 0 | 0 | 0 |
| 4054 | Cattle | Eastern | 0 | 0 | 0 | 0 | 0 | 0 |
| 4055 | Cattle | Eastern | 0 | 0 | 0 | 0 | 0 | 0 |
| 4056 | Cattle | Eastern | 0 | 0 | 0 | 0 | 0 | 0 |
| 4057 | Cattle | Eastern | 0 | 0 | 0 | 0 | 0 | 0 |
| 4058 | Cattle | Eastern | 0 | 0 | 0 | 0 | 0 | 0 |
| 4059 | Cattle | Eastern | 0 | 0 | 0 | 0 | 0 | 0 |
| 4060 | Cattle | Eastern | 0 | 0 | 0 | 0 | 0 | 0 |
| 4061 | Cattle | Eastern | 0 | 0 | 0 | 0 | 0 | 0 |
| 4062 | Cattle | Eastern | 0 | 0 | 0 | 0 | 0 | 0 |
| 4063 | Cattle | Eastern | 0 | 0 | 0 | 0 | 0 | 0 |
| 4064 | Cattle | Eastern | 0 | 0 | 0 | 0 | 0 | 0 |
| 4065 | Cattle | Eastern | 0 | 0 | 1 | 1 | 0 | 1 |
| 4066 | Cattle | Eastern | 0 | 0 | 1 | 1 | 0 | 1 |
| 4067 | Cattle | Eastern | 0 | 0 | 1 | 1 | 0 | 1 |
| 4068 | Cattle | Eastern | 0 | 0 | 1 | 1 | 0 | 1 |
| 4069 | Cattle | Eastern | 0 | 0 | 0 | 0 | 0 | 0 |
| 4070 | Cattle | Eastern | 0 | 0 | 1 | 1 | 0 | 1 |
| 4071 | Cattle | Eastern | 0 | 0 | 0 | 0 | 0 | 0 |
| 4072 | Cattle | Eastern | 0 | 0 | 0 | 0 | 0 | 0 |
| 4073 | Cattle | Eastern | 0 | 0 | 0 | 0 | 0 | 0 |
| 4074 | Cattle | Eastern | 0 | 0 | 0 | 0 | 0 | 0 |
| 4075 | Cattle | Eastern | 0 | 0 | 0 | 0 | 0 | 0 |
| 4076 | Cattle | Eastern | 0 | 0 | 1 | 1 | 0 | 1 |
| 4077 | Cattle | Eastern | 0 | 0 | 1 | 1 | 0 | 1 |
| 4078 | Cattle | Eastern | 0 | 0 | 0 | 0 | 0 | 0 |
| 4079 | Cattle | Eastern | 0 | 0 | 0 | 0 | 0 | 0 |

|      |        |              |   |   |   |   |   |   |
|------|--------|--------------|---|---|---|---|---|---|
| 4080 | Cattle | Eastern      | 0 | 0 | 0 | 0 | 0 | 0 |
| 4081 | Cattle | Eastern      | 0 | 0 | 0 | 0 | 0 | 0 |
| 4082 | Cattle | Eastern      | 0 | 0 | 1 | 0 | 0 | 1 |
| 4083 | Cattle | Eastern      | 0 | 0 | 1 | 0 | 0 | 1 |
| 4084 | Cattle | Eastern      | 0 | 0 | 0 | 0 | 0 | 0 |
| 4085 | Cattle | Eastern      | 0 | 0 | 1 | 0 | 0 | 1 |
| 4086 | Cattle | Eastern      | 0 | 0 | 1 | 0 | 0 | 1 |
| 4087 | Cattle | Eastern      | 0 | 0 | 1 | 0 | 0 | 1 |
| 4088 | Cattle | Eastern      | 0 | 0 | 1 | 1 | 0 | 1 |
| 4089 | Cattle | Eastern      | 0 | 0 | 0 | 0 | 0 | 0 |
| 4090 | Cattle | Eastern      | 0 | 0 | 1 | 0 | 0 | 1 |
| 4091 | Cattle | Eastern      | 0 | 0 | 0 | 0 | 0 | 0 |
| 4092 | Cattle | Eastern      | 0 | 0 | 1 | 0 | 0 | 1 |
| 4093 | Cattle | Eastern      | 0 | 0 | 0 | 0 | 0 | 0 |
| 4094 | Cattle | Eastern      | 0 | 0 | 0 | 0 | 0 | 0 |
| 4095 | Cattle | Eastern      | 0 | 0 | 0 | 0 | 0 | 0 |
| 4096 | Cattle | Eastern      | 0 | 0 | 0 | 0 | 0 | 0 |
| 4097 | Cattle | Central      | 0 | 0 | 1 | 1 | 0 | 1 |
| 4098 | Cattle | Central      | 0 | 0 | 0 | 0 | 0 | 0 |
| 4099 | Cattle | Central      | 0 | 0 | 1 | 1 | 0 | 1 |
| 4100 | Cattle | Central      | 0 | 0 | 0 | 1 | 0 | 1 |
| 4101 | Cattle | Central      | 0 | 0 | 0 | 0 | 0 | 0 |
| 4102 | Cattle | Central      | 0 | 0 | 0 | 0 | 0 | 0 |
| 4103 | Cattle | Central      | 0 | 0 | 0 | 0 | 0 | 0 |
| 4104 | Cattle | Central      | 0 | 0 | 0 | 0 | 0 | 1 |
| 4105 | Cattle | Central      | 0 | 0 | 0 | 1 | 0 | 1 |
| 4106 | Cattle | Central      | 0 | 1 | 0 | 0 | 0 | 1 |
| 4107 | Cattle | Central      | 0 | 0 | 0 | 0 | 0 | 0 |
| 4108 | Cattle | Central      | 0 | 0 | 0 | 1 | 0 | 1 |
| 4109 | Cattle | Central      | 0 | 0 | 0 | 0 | 0 | 0 |
| 4110 | Cattle | Central      | 0 | 1 | 0 | 1 | 0 | 1 |
| 4111 | Cattle | Central      | 0 | 0 | 0 | 1 | 0 | 1 |
| 4112 | Cattle | Central      | 0 | 0 | 0 | 0 | 0 | 0 |
| 4113 | Cattle | Central      | 0 | 0 | 0 | 0 | 0 | 0 |
| 4114 | Cattle | Central      | 0 | 0 | 0 | 0 | 0 | 0 |
| 4115 | Cattle | Central      | 0 | 0 | 0 | 0 | 0 | 0 |
| 4116 | Cattle | Northeastern | 0 | 0 | 0 | 0 | 0 | 0 |
| 4117 | Cattle | Northeastern | 0 | 1 | 0 | 0 | 0 | 1 |
| 4118 | Cattle | Northeastern | 0 | 0 | 0 | 0 | 0 | 0 |
| 4119 | Cattle | Northeastern | 0 | 0 | 0 | 0 | 0 | 0 |
| 4120 | Cattle | Northeastern | 0 | 0 | 0 | 0 | 0 | 0 |
| 4121 | Cattle | Northeastern | 0 | 0 | 0 | 0 | 0 | 0 |
| 4122 | Cattle | Northeastern | 0 | 0 | 0 | 0 | 0 | 0 |
| 4123 | Cattle | Northeastern | 0 | 0 | 0 | 0 | 0 | 0 |
| 4124 | Cattle | Central      | 0 | 0 | 0 | 0 | 0 | 0 |
| 4125 | Cattle | Northern     | 0 | 0 | 0 | 0 | 0 | 0 |
| 4126 | Cattle | Northern     | 0 | 0 | 0 | 0 | 0 | 0 |
| 4127 | Cattle | Northern     | 0 | 0 | 0 | 0 | 0 | 0 |

|      |        |              |   |   |   |   |   |   |
|------|--------|--------------|---|---|---|---|---|---|
| 4128 | Cattle | Northern     | 0 | 0 | 0 | 0 | 0 | 0 |
| 4129 | Cattle | Northern     | 0 | 0 | 0 | 0 | 0 | 0 |
| 4130 | Cattle | Northern     | 0 | 0 | 0 | 0 | 0 | 0 |
| 4131 | Cattle | Northern     | 0 | 0 | 0 | 0 | 0 | 0 |
| 4132 | Cattle | Northern     | 0 | 0 | 0 | 0 | 0 | 0 |
| 4133 | Cattle | Northern     | 0 | 0 | 0 | 0 | 0 | 0 |
| 4134 | Cattle | Northern     | 0 | 0 | 0 | 0 | 0 | 0 |
| 4135 | Cattle | Northern     | 0 | 0 | 0 | 0 | 0 | 0 |
| 4136 | Cattle | Northern     | 0 | 0 | 0 | 0 | 0 | 0 |
| 4137 | Cattle | Northern     | 0 | 0 | 0 | 0 | 0 | 0 |
| 4138 | Cattle | Northern     | 0 | 0 | 0 | 0 | 0 | 0 |
| 4139 | Cattle | Northern     | 0 | 0 | 0 | 0 | 0 | 0 |
| 4140 | Cattle | Northern     | 0 | 0 | 0 | 0 | 0 | 0 |
| 4141 | Cattle | Northern     | 0 | 0 | 0 | 0 | 0 | 0 |
| 4142 | Cattle | Central      | 0 | 0 | 0 | 0 | 0 | 0 |
| 4143 | Cattle | Central      | 0 | 0 | 0 | 0 | 0 | 0 |
| 4144 | Cattle | Central      | 0 | 0 | 0 | 0 | 0 | 0 |
| 4145 | Cattle | Central      | 0 | 0 | 0 | 0 | 0 | 0 |
| 4146 | Cattle | Central      | 0 | 0 | 0 | 0 | 0 | 0 |
| 4147 | Cattle | Central      | 0 | 0 | 0 | 0 | 0 | 0 |
| 4148 | Cattle | Central      | 0 | 0 | 0 | 0 | 0 | 0 |
| 4149 | Cattle | Central      | 0 | 0 | 0 | 0 | 0 | 0 |
| 4150 | Cattle | Central      | 0 | 0 | 0 | 0 | 0 | 0 |
| 4151 | Cattle | Central      | 0 | 0 | 0 | 0 | 0 | 0 |
| 4152 | Cattle | Central      | 0 | 0 | 0 | 0 | 0 | 0 |
| 4153 | Cattle | Central      | 0 | 0 | 0 | 0 | 0 | 0 |
| 4154 | Cattle | Central      | 0 | 0 | 0 | 0 | 0 | 0 |
| 4155 | Cattle | Central      | 0 | 0 | 0 | 0 | 0 | 0 |
| 4156 | Cattle | Central      | 0 | 0 | 0 | 0 | 0 | 0 |
| 4157 | Cattle | Central      | 0 | 0 | 0 | 0 | 0 | 0 |
| 4158 | Cattle | Central      | 0 | 0 | 0 | 0 | 0 | 0 |
| 4159 | Cattle | Central      | 0 | 0 | 0 | 0 | 0 | 0 |
| 4160 | Cattle | Central      | 0 | 0 | 0 | 0 | 0 | 0 |
| 4161 | Cattle | Central      | 0 | 0 | 0 | 0 | 0 | 0 |
| 4162 | Cattle | Central      | 0 | 0 | 0 | 0 | 0 | 0 |
| 4163 | Cattle | Central      | 0 | 0 | 0 | 0 | 0 | 0 |
| 4164 | Cattle | Central      | 0 | 0 | 0 | 0 | 0 | 0 |
| 4165 | Cattle | Eastern      | 0 | 0 | 1 | 1 | 0 | 1 |
| 4166 | Cattle | Eastern      | 0 | 0 | 1 | 0 | 0 | 1 |
| 4167 | Cattle | Eastern      | 0 | 0 | 1 | 1 | 0 | 1 |
| 4168 | Cattle | Eastern      | 0 | 0 | 1 | 1 | 0 | 1 |
| 4169 | Cattle | Eastern      | 0 | 0 | 0 | 0 | 0 | 0 |
| 4170 | Cattle | Eastern      | 0 | 0 | 0 | 0 | 0 | 0 |
| 4171 | Cattle | Eastern      | 0 | 0 | 0 | 0 | 0 | 0 |
| 4172 | Cattle | Northeastern | 0 | 0 | 0 | 0 | 0 | 0 |
| 4173 | Cattle | Northeastern | 0 | 0 | 0 | 0 | 0 | 0 |
| 4174 | Cattle | Northeastern | 0 | 0 | 0 | 0 | 0 | 0 |
| 4175 | Cattle | Northeastern | 0 | 0 | 0 | 0 | 0 | 0 |

|      |        |              |   |   |   |   |   |   |
|------|--------|--------------|---|---|---|---|---|---|
| 4176 | Cattle | Central      | 0 | 1 | 0 | 0 | 0 | 1 |
| 4177 | Cattle | Central      | 0 | 1 | 0 | 0 | 0 | 1 |
| 4178 | Cattle | Central      | 0 | 0 | 0 | 0 | 0 | 0 |
| 4179 | Cattle | Central      | 0 | 1 | 0 | 0 | 0 | 1 |
| 4180 | Cattle | Central      | 0 | 0 | 0 | 0 | 0 | 0 |
| 4181 | Cattle | Central      | 0 | 0 | 0 | 0 | 0 | 0 |
| 4182 | Cattle | Central      | 0 | 0 | 0 | 0 | 0 | 0 |
| 4183 | Cattle | Central      | 0 | 0 | 0 | 0 | 0 | 0 |
| 4184 | Cattle | Central      | 0 | 1 | 0 | 0 | 0 | 1 |
| 4185 | Cattle | Central      | 0 | 1 | 0 | 0 | 0 | 1 |
| 4186 | Cattle | Central      | 0 | 1 | 0 | 0 | 0 | 1 |
| 4187 | Cattle | Central      | 0 | 0 | 0 | 0 | 0 | 0 |
| 4188 | Cattle | Central      | 0 | 0 | 0 | 0 | 0 | 0 |
| 4189 | Cattle | Central      | 0 | 0 | 0 | 1 | 0 | 1 |
| 4190 | Cattle | Central      | 0 | 0 | 0 | 0 | 0 | 0 |
| 4191 | Cattle | Central      | 0 | 0 | 0 | 0 | 0 | 0 |
| 4192 | Cattle | Central      | 0 | 0 | 0 | 0 | 0 | 0 |
| 4193 | Cattle | Central      | 0 | 0 | 0 | 0 | 0 | 0 |
| 4194 | Cattle | Central      | 0 | 0 | 0 | 0 | 0 | 0 |
| 4195 | Cattle | Central      | 0 | 0 | 0 | 0 | 0 | 0 |
| 4196 | Cattle | Central      | 0 | 0 | 0 | 0 | 0 | 0 |
| 4197 | Cattle | Central      | 0 | 0 | 0 | 0 | 0 | 0 |
| 4198 | Cattle | Central      | 0 | 0 | 0 | 0 | 0 | 0 |
| 4199 | Cattle | Central      | 0 | 0 | 0 | 0 | 0 | 0 |
| 4200 | Cattle | Central      | 0 | 0 | 0 | 0 | 0 | 0 |
| 4201 | Cattle | Central      | 0 | 0 | 0 | 0 | 0 | 0 |
| 4202 | Cattle | Central      | 0 | 0 | 0 | 0 | 0 | 0 |
| 4203 | Cattle | Central      | 0 | 0 | 0 | 0 | 0 | 0 |
| 4204 | Cattle | Central      | 0 | 0 | 0 | 0 | 0 | 0 |
| 4205 | Cattle | Central      | 0 | 1 | 0 | 0 | 0 | 1 |
| 4206 | Cattle | Central      | 0 | 1 | 0 | 0 | 0 | 1 |
| 4207 | Cattle | Central      | 0 | 0 | 0 | 0 | 0 | 0 |
| 4208 | Cattle | Central      | 0 | 1 | 0 | 0 | 0 | 1 |
| 4209 | Cattle | Central      | 0 | 0 | 0 | 0 | 0 | 0 |
| 4210 | Cattle | Central      | 0 | 0 | 0 | 0 | 0 | 0 |
| 4211 | Cattle | Central      | 0 | 0 | 0 | 0 | 0 | 0 |
| 4212 | Cattle | Central      | 0 | 0 | 0 | 0 | 0 | 0 |
| 4213 | Cattle | Central      | 0 | 0 | 0 | 0 | 0 | 0 |
| 4214 | Cattle | Central      | 0 | 0 | 0 | 0 | 0 | 0 |
| 4215 | Cattle | Central      | 0 | 0 | 0 | 0 | 0 | 0 |
| 4216 | Cattle | Central      | 0 | 0 | 0 | 0 | 0 | 0 |
| 4217 | Cattle | Central      | 0 | 0 | 0 | 0 | 0 | 0 |
| 4218 | Cattle | Central      | 0 | 0 | 0 | 0 | 0 | 0 |
| 4219 | Cattle | Central      | 0 | 0 | 1 | 0 | 0 | 1 |
| 4220 | Cattle | Central      | 0 | 0 | 0 | 0 | 0 | 0 |
| 4221 | Cattle | Northeastern | 0 | 0 | 0 | 0 | 0 | 0 |
| 4222 | Cattle | Northeastern | 0 | 0 | 0 | 0 | 0 | 0 |
| 4223 | Cattle | Northeastern | 0 | 0 | 0 | 0 | 0 | 0 |



|      |        |              |   |   |   |   |   |   |
|------|--------|--------------|---|---|---|---|---|---|
| 4224 | Cattle | Northeastern | 0 | 0 | 0 | 0 | 0 | 0 |
| 4225 | Cattle | Northeastern | 0 | 0 | 0 | 0 | 0 | 0 |
| 4226 | Cattle | Northeastern | 0 | 0 | 0 | 0 | 0 | 0 |
| 4227 | Cattle | Northeastern | 0 | 0 | 0 | 0 | 0 | 0 |
| 4228 | Cattle | Northeastern | 0 | 0 | 0 | 0 | 0 | 0 |
| 4229 | Cattle | Northeastern | 0 | 0 | 0 | 0 | 0 | 0 |
| 4230 | Cattle | Eastern      | 0 | 0 | 0 | 0 | 0 | 0 |
| 4231 | Cattle | Eastern      | 0 | 0 | 1 | 1 | 0 | 1 |
| 4232 | Cattle | Eastern      | 0 | 0 | 1 | 1 | 0 | 1 |
| 4233 | Cattle | Eastern      | 0 | 0 | 1 | 1 | 0 | 1 |
| 4234 | Cattle | Eastern      | 0 | 1 | 1 | 1 | 0 | 1 |
| 4235 | Cattle | Eastern      | 0 | 0 | 0 | 0 | 0 | 0 |
| 4236 | Cattle | Eastern      | 0 | 0 | 1 | 1 | 0 | 1 |
| 4237 | Cattle | Eastern      | 0 | 0 | 0 | 0 | 0 | 0 |
| 4238 | Cattle | Eastern      | 0 | 0 | 1 | 1 | 0 | 1 |
| 4239 | Cattle | Eastern      | 0 | 1 | 1 | 1 | 0 | 1 |
| 4240 | Cattle | Eastern      | 0 | 1 | 1 | 0 | 0 | 1 |
| 4241 | Cattle | Eastern      | 0 | 0 | 1 | 0 | 0 | 1 |
| 4242 | Cattle | Eastern      | 0 | 0 | 0 | 0 | 0 | 0 |
| 4243 | Cattle | Northeastern | 0 | 0 | 0 | 1 | 0 | 1 |
| 4244 | Cattle | Northeastern | 0 | 0 | 1 | 1 | 0 | 1 |
| 4245 | Cattle | Northeastern | 0 | 0 | 1 | 1 | 0 | 1 |
| 4246 | Cattle | Northeastern | 0 | 0 | 1 | 1 | 0 | 1 |
| 4247 | Cattle | Northeastern | 0 | 0 | 1 | 1 | 0 | 1 |
| 4248 | Cattle | Northeastern | 0 | 0 | 0 | 1 | 0 | 1 |
| 4249 | Cattle | Northeastern | 0 | 0 | 0 | 0 | 0 | 0 |
| 4250 | Cattle | Northeastern | 0 | 0 | 0 | 0 | 0 | 0 |
| 4251 | Cattle | Northeastern | 0 | 0 | 0 | 0 | 0 | 0 |
| 4252 | Cattle | Northeastern | 0 | 0 | 0 | 0 | 0 | 0 |
| 4253 | Cattle | Northeastern | 0 | 0 | 0 | 1 | 0 | 1 |
| 4254 | Cattle | Northeastern | 0 | 0 | 0 | 0 | 0 | 0 |
| 4255 | Cattle | Northeastern | 0 | 0 | 0 | 1 | 0 | 1 |
| 4256 | Cattle | Northeastern | 0 | 0 | 0 | 0 | 0 | 0 |
| 4257 | Cattle | Northeastern | 0 | 0 | 0 | 0 | 0 | 0 |
| 4258 | Cattle | Northeastern | 0 | 0 | 0 | 0 | 0 | 0 |
| 4259 | Cattle | Northeastern | 0 | 0 | 0 | 0 | 1 | 1 |
| 4260 | Cattle | Central      | 0 | 0 | 0 | 0 | 0 | 0 |
| 4261 | Cattle | Northern     | 0 | 0 | 0 | 0 | 0 | 0 |
| 4262 | Cattle | Northern     | 0 | 0 | 0 | 0 | 0 | 0 |
| 4263 | Cattle | Northeastern | 0 | 0 | 0 | 0 | 0 | 0 |
| 4264 | Cattle | Northeastern | 0 | 0 | 0 | 0 | 0 | 0 |
| 4265 | Cattle | Northeastern | 0 | 0 | 0 | 1 | 0 | 1 |
| 4266 | Cattle | Northeastern | 0 | 0 | 0 | 0 | 0 | 0 |
| 4267 | Cattle | Northeastern | 0 | 0 | 0 | 0 | 0 | 0 |
| 4268 | Cattle | Northeastern | 0 | 0 | 0 | 1 | 0 | 1 |
| 4269 | Cattle | Northeastern | 0 | 0 | 0 | 0 | 0 | 0 |
| 4270 | Cattle | Northeastern | 0 | 0 | 0 | 0 | 0 | 0 |
| 4271 | Cattle | Northeastern | 0 | 0 | 0 | 0 | 0 | 0 |

|      |        |              |   |   |   |   |   |   |
|------|--------|--------------|---|---|---|---|---|---|
| 4272 | Cattle | Northeastern | 0 | 0 | 0 | 0 | 0 | 0 |
| 4273 | Cattle | Northeastern | 0 | 0 | 0 | 0 | 0 | 0 |
| 4274 | Cattle | Northeastern | 0 | 0 | 1 | 1 | 0 | 1 |
| 4275 | Cattle | Northeastern | 0 | 0 | 0 | 0 | 0 | 0 |
| 4276 | Cattle | Northeastern | 0 | 0 | 1 | 1 | 0 | 1 |
| 4277 | Cattle | Northeastern | 0 | 0 | 0 | 0 | 0 | 0 |
| 4278 | Cattle | Northeastern | 0 | 0 | 0 | 0 | 0 | 0 |
| 4279 | Cattle | Northeastern | 0 | 0 | 0 | 0 | 0 | 0 |
| 4280 | Cattle | Northeastern | 0 | 0 | 0 | 0 | 0 | 0 |
| 4281 | Cattle | Northeastern | 0 | 0 | 0 | 0 | 0 | 0 |
| 4282 | Cattle | Northeastern | 0 | 0 | 0 | 0 | 0 | 0 |
| 4283 | Cattle | Northeastern | 0 | 0 | 0 | 0 | 0 | 0 |
| 4284 | Cattle | Northeastern | 0 | 0 | 0 | 0 | 0 | 0 |
| 4285 | Cattle | Northeastern | 0 | 0 | 0 | 0 | 0 | 0 |
| 4286 | Cattle | Northeastern | 0 | 0 | 0 | 0 | 0 | 0 |
| 4287 | Cattle | Northeastern | 0 | 0 | 0 | 0 | 0 | 0 |
| 4288 | Cattle | Central      | 0 | 0 | 1 | 1 | 0 | 1 |
| 4289 | Cattle | Central      | 0 | 0 | 0 | 0 | 0 | 0 |
| 4290 | Cattle | Central      | 0 | 0 | 0 | 0 | 0 | 0 |
| 4291 | Cattle | Central      | 0 | 0 | 0 | 0 | 0 | 0 |
| 4292 | Cattle | Central      | 0 | 0 | 0 | 0 | 0 | 0 |
| 4293 | Cattle | Central      | 0 | 0 | 0 | 0 | 0 | 0 |
| 4294 | Cattle | Central      | 0 | 0 | 0 | 0 | 0 | 0 |
| 4295 | Cattle | Central      | 0 | 0 | 0 | 0 | 0 | 0 |
| 4296 | Cattle | Central      | 0 | 0 | 0 | 0 | 0 | 0 |
| 4297 | Cattle | Central      | 0 | 0 | 0 | 0 | 0 | 0 |
| 4298 | Cattle | Central      | 0 | 0 | 0 | 0 | 0 | 0 |
| 4299 | Cattle | Central      | 0 | 0 | 0 | 0 | 0 | 0 |
| 4300 | Cattle | Central      | 0 | 0 | 0 | 0 | 0 | 0 |
| 4301 | Cattle | Central      | 0 | 0 | 0 | 0 | 0 | 0 |
| 4302 | Cattle | Central      | 0 | 0 | 0 | 0 | 0 | 0 |
| 4303 | Cattle | Central      | 0 | 0 | 0 | 0 | 0 | 0 |
| 4304 | Cattle | Central      | 0 | 0 | 1 | 0 | 0 | 1 |
| 4305 | Cattle | Central      | 0 | 0 | 0 | 0 | 0 | 0 |
| 4306 | Cattle | Central      | 0 | 0 | 0 | 0 | 0 | 0 |
| 4307 | Cattle | Central      | 0 | 0 | 0 | 0 | 0 | 0 |
| 4308 | Cattle | Central      | 0 | 0 | 1 | 1 | 0 | 1 |
| 4309 | Cattle | Central      | 0 | 0 | 0 | 0 | 0 | 0 |
| 4310 | Cattle | Central      | 0 | 0 | 0 | 0 | 0 | 0 |
| 4311 | Cattle | Central      | 0 | 0 | 0 | 0 | 0 | 0 |
| 4312 | Cattle | Central      | 0 | 0 | 0 | 0 | 0 | 0 |
| 4313 | Cattle | Central      | 0 | 0 | 0 | 0 | 0 | 0 |
| 4314 | Cattle | Central      | 0 | 0 | 0 | 0 | 0 | 0 |
| 4315 | Cattle | Central      | 0 | 0 | 1 | 0 | 0 | 1 |
| 4316 | Cattle | Central      | 0 | 0 | 0 | 0 | 0 | 0 |
| 4317 | Cattle | Central      | 0 | 0 | 0 | 0 | 0 | 0 |
| 4318 | Cattle | Central      | 0 | 0 | 0 | 0 | 0 | 0 |
| 4319 | Cattle | Central      | 0 | 0 | 0 | 0 | 0 | 0 |

|      |        |              |   |   |   |   |   |   |
|------|--------|--------------|---|---|---|---|---|---|
| 4320 | Cattle | Central      | 0 | 0 | 0 | 0 | 0 | 0 |
| 4321 | Cattle | Central      | 0 | 0 | 0 | 0 | 0 | 0 |
| 4322 | Cattle | Central      | 0 | 0 | 1 | 0 | 0 | 1 |
| 4323 | Cattle | Central      | 0 | 0 | 0 | 0 | 0 | 0 |
| 4324 | Cattle | Northeastern | 0 | 0 | 0 | 0 | 0 | 0 |
| 4325 | Cattle | Northeastern | 0 | 0 | 0 | 0 | 0 | 0 |
| 4326 | Cattle | Northeastern | 0 | 0 | 0 | 0 | 0 | 0 |
| 4327 | Cattle | Central      | 0 | 0 | 1 | 1 | 0 | 1 |
| 4328 | Cattle | Central      | 0 | 0 | 0 | 1 | 0 | 1 |
| 4329 | Cattle | Central      | 0 | 0 | 0 | 0 | 0 | 0 |
| 4330 | Cattle | Central      | 0 | 0 | 0 | 0 | 0 | 0 |
| 4331 | Cattle | Central      | 0 | 0 | 0 | 0 | 0 | 0 |
| 4332 | Cattle | Central      | 0 | 0 | 1 | 1 | 0 | 1 |
| 4333 | Cattle | Central      | 0 | 0 | 0 | 0 | 0 | 0 |
| 4334 | Cattle | Central      | 0 | 0 | 1 | 1 | 0 | 1 |
| 4335 | Cattle | Central      | 0 | 0 | 0 | 0 | 0 | 0 |
| 4336 | Cattle | Central      | 0 | 0 | 0 | 1 | 0 | 1 |
| 4337 | Cattle | Central      | 0 | 0 | 1 | 1 | 0 | 1 |
| 4338 | Cattle | Central      | 0 | 0 | 0 | 0 | 0 | 0 |
| 4339 | Cattle | Central      | 0 | 0 | 0 | 0 | 0 | 0 |
| 4340 | Cattle | Central      | 0 | 0 | 0 | 0 | 0 | 0 |
| 4341 | Cattle | Central      | 0 | 0 | 0 | 0 | 0 | 0 |
| 4342 | Cattle | Central      | 0 | 0 | 0 | 0 | 0 | 0 |
| 4343 | Cattle | Central      | 0 | 0 | 0 | 0 | 0 | 0 |
| 4344 | Cattle | Central      | 0 | 0 | 0 | 0 | 0 | 0 |
| 4345 | Cattle | Central      | 0 | 0 | 0 | 0 | 0 | 0 |
| 4346 | Cattle | Central      | 0 | 0 | 0 | 0 | 0 | 0 |
| 4347 | Cattle | Central      | 0 | 0 | 0 | 0 | 0 | 0 |
| 4348 | Cattle | Central      | 0 | 0 | 0 | 0 | 0 | 0 |
| 4349 | Cattle | Central      | 0 | 0 | 0 | 0 | 0 | 0 |
| 4350 | Cattle | Central      | 0 | 0 | 0 | 0 | 0 | 0 |
| 4351 | Cattle | Central      | 0 | 0 | 0 | 0 | 0 | 0 |
| 4352 | Cattle | Central      | 0 | 0 | 0 | 0 | 0 | 0 |
| 4353 | Cattle | Central      | 0 | 0 | 0 | 0 | 0 | 0 |
| 4354 | Cattle | Central      | 0 | 0 | 0 | 0 | 0 | 0 |
| 4355 | Cattle | Central      | 0 | 0 | 0 | 0 | 0 | 0 |
| 4356 | Cattle | Central      | 0 | 0 | 0 | 0 | 0 | 0 |
| 4357 | Cattle | Central      | 0 | 0 | 0 | 0 | 0 | 0 |
| 4358 | Cattle | Central      | 0 | 0 | 0 | 0 | 0 | 0 |
| 4359 | Cattle | Central      | 0 | 0 | 0 | 0 | 0 | 0 |
| 4360 | Cattle | Eastern      | 0 | 0 | 1 | 1 | 0 | 1 |
| 4361 | Cattle | Eastern      | 0 | 0 | 1 | 1 | 0 | 1 |
| 4362 | Cattle | Eastern      | 0 | 0 | 1 | 1 | 0 | 1 |
| 4363 | Cattle | Eastern      | 0 | 0 | 1 | 1 | 0 | 1 |
| 4364 | Cattle | Central      | 0 | 0 | 1 | 0 | 0 | 1 |
| 4365 | Cattle | Central      | 0 | 0 | 0 | 0 | 0 | 0 |
| 4366 | Cattle | Central      | 0 | 0 | 0 | 1 | 0 | 1 |
| 4367 | Cattle | Central      | 0 | 0 | 0 | 0 | 0 | 0 |

|      |        |              |   |   |   |   |   |   |
|------|--------|--------------|---|---|---|---|---|---|
| 4368 | Cattle | Central      | 0 | 0 | 0 | 1 | 0 | 1 |
| 4369 | Cattle | Central      | 0 | 0 | 0 | 1 | 0 | 1 |
| 4370 | Cattle | Central      | 0 | 0 | 1 | 1 | 0 | 1 |
| 4371 | Cattle | Central      | 0 | 0 | 1 | 0 | 0 | 1 |
| 4372 | Cattle | Central      | 0 | 0 | 0 | 0 | 0 | 0 |
| 4373 | Cattle | Central      | 0 | 0 | 0 | 0 | 0 | 0 |
| 4374 | Cattle | Central      | 0 | 0 | 0 | 1 | 0 | 1 |
| 4375 | Cattle | Central      | 0 | 0 | 0 | 0 | 0 | 0 |
| 4376 | Cattle | Central      | 0 | 0 | 1 | 1 | 0 | 1 |
| 4377 | Cattle | Central      | 0 | 0 | 0 | 0 | 0 | 0 |
| 4378 | Cattle | Central      | 0 | 0 | 0 | 0 | 0 | 0 |
| 4379 | Cattle | Central      | 0 | 0 | 0 | 1 | 0 | 1 |
| 4380 | Cattle | Central      | 0 | 0 | 1 | 1 | 0 | 1 |
| 4381 | Cattle | Northeastern | 0 | 0 | 0 | 0 | 0 | 0 |
| 4382 | Cattle | Northeastern | 0 | 0 | 0 | 0 | 0 | 0 |
| 4383 | Cattle | Northeastern | 0 | 0 | 0 | 0 | 0 | 0 |
| 4384 | Cattle | Northeastern | 0 | 0 | 0 | 0 | 0 | 0 |
| 4385 | Cattle | Northeastern | 0 | 0 | 0 | 0 | 0 | 0 |
| 4386 | Cattle | Northeastern | 0 | 0 | 0 | 0 | 0 | 0 |
| 4387 | Cattle | Northeastern | 0 | 0 | 0 | 0 | 0 | 0 |
| 4388 | Cattle | Northeastern | 0 | 0 | 0 | 0 | 0 | 0 |
| 4389 | Cattle | Northeastern | 0 | 1 | 0 | 0 | 0 | 1 |
| 4390 | Cattle | Northeastern | 0 | 0 | 0 | 0 | 0 | 0 |
| 4391 | Cattle | Northeastern | 0 | 0 | 0 | 0 | 0 | 0 |
| 4392 | Cattle | Northeastern | 0 | 0 | 0 | 0 | 0 | 0 |
| 4393 | Cattle | Northeastern | 0 | 0 | 0 | 0 | 0 | 0 |
| 4394 | Cattle | Northeastern | 0 | 0 | 0 | 0 | 0 | 0 |
| 4395 | Cattle | Northeastern | 0 | 0 | 0 | 0 | 0 | 0 |
| 4396 | Cattle | Northeastern | 0 | 0 | 0 | 0 | 0 | 0 |
| 4397 | Cattle | Northeastern | 0 | 0 | 0 | 0 | 0 | 0 |
| 4398 | Cattle | Northeastern | 0 | 0 | 0 | 0 | 0 | 0 |
| 4399 | Cattle | Northeastern | 0 | 0 | 0 | 0 | 0 | 0 |
| 4400 | Cattle | Northeastern | 0 | 0 | 0 | 0 | 0 | 0 |
| 4401 | Cattle | Northeastern | 0 | 0 | 0 | 0 | 0 | 0 |
| 4402 | Cattle | Northeastern | 0 | 0 | 0 | 0 | 0 | 0 |
| 4403 | Cattle | Northeastern | 0 | 0 | 0 | 0 | 0 | 0 |
| 4404 | Cattle | Northeastern | 0 | 0 | 0 | 0 | 0 | 0 |
| 4405 | Cattle | Northeastern | 0 | 0 | 0 | 0 | 0 | 0 |
| 4406 | Cattle | Northeastern | 0 | 0 | 0 | 0 | 0 | 0 |
| 4407 | Cattle | Northeastern | 0 | 0 | 0 | 0 | 0 | 0 |
| 4408 | Cattle | Northeastern | 0 | 0 | 0 | 0 | 0 | 0 |
| 4409 | Cattle | Northeastern | 0 | 0 | 0 | 0 | 0 | 0 |
| 4410 | Cattle | Northeastern | 0 | 0 | 0 | 0 | 0 | 0 |
| 4411 | Cattle | Northeastern | 0 | 0 | 0 | 0 | 0 | 0 |
| 4412 | Cattle | Northeastern | 0 | 0 | 0 | 0 | 0 | 0 |
| 4413 | Cattle | Northeastern | 0 | 0 | 0 | 0 | 0 | 0 |
| 4414 | Cattle | Northeastern | 0 | 0 | 0 | 0 | 0 | 0 |
| 4415 | Cattle | Northeastern | 0 | 0 | 0 | 0 | 0 | 0 |

|      |        |              |   |   |   |   |   |   |
|------|--------|--------------|---|---|---|---|---|---|
| 4416 | Cattle | Northeastern | 0 | 0 | 0 | 0 | 0 | 0 |
| 4417 | Cattle | Northeastern | 0 | 0 | 0 | 0 | 0 | 0 |
| 4418 | Cattle | Northeastern | 0 | 0 | 0 | 0 | 0 | 0 |
| 4419 | Cattle | Northeastern | 0 | 0 | 0 | 0 | 0 | 0 |
| 4420 | Cattle | Northeastern | 0 | 1 | 0 | 0 | 0 | 1 |
| 4421 | Cattle | Northeastern | 0 | 0 | 0 | 0 | 0 | 0 |
| 4422 | Cattle | Northeastern | 0 | 0 | 0 | 0 | 0 | 0 |
| 4423 | Cattle | Northeastern | 0 | 0 | 0 | 0 | 0 | 0 |
| 4424 | Cattle | Northeastern | 0 | 0 | 0 | 0 | 0 | 0 |
| 4425 | Cattle | Northeastern | 0 | 0 | 0 | 0 | 0 | 0 |
| 4426 | Cattle | Northeastern | 0 | 0 | 0 | 0 | 0 | 0 |
| 4427 | Cattle | Northeastern | 0 | 0 | 0 | 0 | 0 | 0 |
| 4428 | Cattle | Northeastern | 0 | 0 | 0 | 0 | 0 | 0 |
| 4429 | Cattle | Northeastern | 0 | 0 | 0 | 0 | 0 | 0 |
| 4430 | Cattle | Northeastern | 0 | 0 | 0 | 0 | 0 | 0 |
| 4431 | Cattle | Northeastern | 0 | 0 | 0 | 0 | 0 | 0 |
| 4432 | Cattle | Northeastern | 0 | 0 | 0 | 0 | 0 | 0 |
| 4433 | Cattle | Northeastern | 0 | 0 | 0 | 0 | 0 | 0 |
| 4434 | Cattle | Northeastern | 0 | 0 | 0 | 0 | 0 | 0 |
| 4435 | Cattle | Northeastern | 0 | 0 | 0 | 0 | 0 | 0 |
| 4436 | Cattle | Northeastern | 0 | 0 | 0 | 0 | 0 | 0 |
| 4437 | Cattle | Northeastern | 0 | 0 | 0 | 0 | 0 | 0 |
| 4438 | Cattle | Northeastern | 0 | 0 | 0 | 0 | 0 | 0 |
| 4439 | Cattle | Northeastern | 0 | 0 | 0 | 0 | 0 | 0 |
| 4440 | Cattle | Northeastern | 0 | 0 | 0 | 0 | 0 | 0 |
| 4441 | Cattle | Northeastern | 0 | 0 | 0 | 0 | 0 | 0 |
| 4442 | Cattle | Northeastern | 0 | 0 | 0 | 0 | 0 | 0 |
| 4443 | Cattle | Northeastern | 0 | 0 | 0 | 0 | 0 | 0 |
| 4444 | Cattle | Northeastern | 0 | 0 | 0 | 0 | 0 | 0 |
| 4445 | Cattle | Northeastern | 0 | 0 | 0 | 0 | 0 | 0 |
| 4446 | Cattle | Northeastern | 0 | 0 | 0 | 0 | 0 | 0 |
| 4447 | Cattle | Northeastern | 0 | 0 | 0 | 0 | 0 | 0 |
| 4448 | Cattle | Northeastern | 0 | 0 | 0 | 0 | 0 | 0 |
| 4449 | Cattle | Northeastern | 0 | 0 | 0 | 0 | 0 | 0 |
| 4450 | Cattle | Northeastern | 0 | 0 | 0 | 1 | 0 | 1 |
| 4451 | Cattle | Northeastern | 0 | 0 | 1 | 1 | 0 | 1 |
| 4452 | Cattle | Northeastern | 0 | 0 | 0 | 0 | 0 | 0 |
| 4453 | Cattle | Northeastern | 0 | 0 | 0 | 0 | 0 | 0 |
| 4454 | Cattle | Northeastern | 0 | 1 | 0 | 0 | 0 | 1 |
| 4455 | Cattle | Northeastern | 0 | 0 | 0 | 0 | 0 | 0 |
| 4456 | Cattle | Northeastern | 0 | 0 | 0 | 0 | 0 | 0 |
| 4457 | Cattle | Northeastern | 0 | 0 | 0 | 0 | 0 | 0 |
| 4458 | Cattle | Northeastern | 0 | 0 | 0 | 0 | 0 | 0 |
| 4459 | Cattle | Northeastern | 0 | 0 | 0 | 0 | 0 | 0 |
| 4460 | Cattle | Northeastern | 0 | 0 | 0 | 0 | 0 | 0 |
| 4461 | Cattle | Northeastern | 0 | 0 | 0 | 0 | 0 | 0 |
| 4462 | Cattle | Northeastern | 0 | 0 | 0 | 0 | 0 | 0 |
| 4463 | Cattle | Northeastern | 0 | 0 | 0 | 0 | 0 | 0 |

|      |        |              |   |   |   |   |   |   |
|------|--------|--------------|---|---|---|---|---|---|
| 4464 | Cattle | Northeastern | 0 | 0 | 0 | 0 | 0 | 0 |
| 4465 | Cattle | Northeastern | 0 | 1 | 0 | 0 | 0 | 1 |
| 4466 | Cattle | Northeastern | 0 | 0 | 0 | 0 | 0 | 0 |
| 4467 | Cattle | Northeastern | 0 | 0 | 0 | 0 | 0 | 0 |
| 4468 | Cattle | Northeastern | 0 | 0 | 0 | 0 | 0 | 0 |
| 4469 | Cattle | Northeastern | 0 | 0 | 0 | 0 | 0 | 0 |
| 4470 | Cattle | Northeastern | 0 | 0 | 0 | 0 | 0 | 0 |
| 4471 | Cattle | Northeastern | 0 | 0 | 0 | 0 | 0 | 0 |
| 4472 | Cattle | Northeastern | 0 | 0 | 0 | 0 | 0 | 0 |
| 4473 | Cattle | Northeastern | 0 | 0 | 0 | 0 | 0 | 0 |
| 4474 | Cattle | Northeastern | 0 | 0 | 0 | 0 | 0 | 0 |
| 4475 | Cattle | Northeastern | 0 | 0 | 0 | 0 | 0 | 0 |
| 4476 | Cattle | Northeastern | 0 | 0 | 0 | 0 | 0 | 0 |
| 4477 | Cattle | Northeastern | 0 | 0 | 0 | 0 | 0 | 0 |
| 4478 | Cattle | Northeastern | 0 | 0 | 0 | 0 | 0 | 0 |
| 4479 | Cattle | Northeastern | 0 | 0 | 0 | 0 | 0 | 0 |
| 4480 | Cattle | Northeastern | 0 | 0 | 0 | 0 | 0 | 0 |
| 4481 | Cattle | Northeastern | 0 | 0 | 0 | 0 | 0 | 0 |
| 4482 | Cattle | Northeastern | 0 | 0 | 0 | 0 | 0 | 0 |
| 4483 | Cattle | Northeastern | 0 | 0 | 0 | 0 | 0 | 0 |
| 4484 | Cattle | Northeastern | 0 | 0 | 0 | 0 | 0 | 0 |
| 4485 | Cattle | Northeastern | 0 | 0 | 0 | 0 | 0 | 0 |
| 4486 | Cattle | Northeastern | 0 | 0 | 0 | 0 | 0 | 0 |
| 4487 | Cattle | Northeastern | 0 | 0 | 0 | 0 | 0 | 0 |
| 4488 | Cattle | Northeastern | 0 | 0 | 0 | 0 | 0 | 0 |
| 4489 | Cattle | Northeastern | 0 | 0 | 0 | 0 | 0 | 0 |
| 4490 | Cattle | Northeastern | 0 | 0 | 0 | 0 | 0 | 0 |
| 4491 | Cattle | Northeastern | 0 | 0 | 0 | 0 | 0 | 0 |
| 4492 | Cattle | Northeastern | 0 | 0 | 0 | 0 | 0 | 0 |
| 4493 | Cattle | Northeastern | 0 | 0 | 0 | 0 | 0 | 0 |
| 4494 | Cattle | Northeastern | 0 | 0 | 0 | 0 | 0 | 0 |
| 4495 | Cattle | Northeastern | 0 | 0 | 0 | 0 | 0 | 0 |
| 4496 | Cattle | Northeastern | 0 | 0 | 0 | 0 | 0 | 0 |
| 4497 | Cattle | Northeastern | 0 | 0 | 0 | 0 | 0 | 0 |
| 4498 | Cattle | Northeastern | 0 | 0 | 0 | 0 | 0 | 0 |
| 4499 | Cattle | Northeastern | 0 | 0 | 0 | 0 | 0 | 0 |
| 4500 | Cattle | Northeastern | 0 | 1 | 0 | 0 | 0 | 1 |
| 4501 | Cattle | Northeastern | 0 | 0 | 0 | 0 | 0 | 0 |
| 4502 | Cattle | Northeastern | 0 | 0 | 0 | 0 | 0 | 0 |
| 4503 | Cattle | Northeastern | 0 | 0 | 0 | 0 | 0 | 0 |
| 4504 | Cattle | Northeastern | 0 | 0 | 0 | 0 | 0 | 0 |
| 4505 | Cattle | Northeastern | 0 | 0 | 0 | 0 | 0 | 0 |
| 4506 | Cattle | Northeastern | 0 | 0 | 0 | 0 | 0 | 0 |
| 4507 | Cattle | Northeastern | 0 | 0 | 0 | 0 | 0 | 0 |
| 4508 | Cattle | Northeastern | 0 | 0 | 0 | 0 | 0 | 0 |
| 4509 | Cattle | Northeastern | 0 | 0 | 0 | 0 | 0 | 0 |
| 4510 | Cattle | Northeastern | 0 | 0 | 0 | 0 | 0 | 0 |
| 4511 | Cattle | Southern     | 0 | 0 | 0 | 0 | 0 | 0 |

|      |        |          |   |   |   |   |   |   |
|------|--------|----------|---|---|---|---|---|---|
| 4512 | Cattle | Southern | 0 | 0 | 0 | 0 | 0 | 0 |
| 4513 | Cattle | Southern | 0 | 0 | 0 | 0 | 0 | 0 |
| 4514 | Cattle | Southern | 0 | 0 | 0 | 0 | 0 | 0 |
| 4515 | Cattle | Southern | 0 | 0 | 0 | 0 | 0 | 0 |
| 4516 | Cattle | Southern | 0 | 0 | 0 | 0 | 0 | 0 |
| 4517 | Cattle | Southern | 0 | 0 | 0 | 0 | 0 | 0 |
| 4518 | Cattle | Eastern  | 0 | 0 | 0 | 0 | 0 | 0 |
| 4519 | Cattle | Eastern  | 0 | 0 | 0 | 0 | 0 | 0 |
| 4520 | Cattle | Eastern  | 0 | 0 | 0 | 0 | 0 | 0 |
| 4521 | Cattle | Eastern  | 0 | 0 | 0 | 0 | 0 | 0 |
| 4522 | Cattle | Eastern  | 0 | 0 | 0 | 0 | 0 | 0 |
| 4523 | Cattle | Eastern  | 0 | 0 | 0 | 0 | 0 | 0 |
| 4524 | Cattle | Eastern  | 0 | 0 | 0 | 0 | 0 | 0 |
| 4525 | Cattle | Eastern  | 0 | 0 | 0 | 0 | 0 | 0 |
| 4526 | Cattle | Eastern  | 0 | 0 | 0 | 0 | 0 | 0 |
| 4527 | Cattle | Eastern  | 0 | 0 | 0 | 0 | 0 | 0 |
| 4528 | Cattle | Central  | 0 | 0 | 0 | 0 | 0 | 0 |
| 4529 | Cattle | Central  | 0 | 0 | 0 | 0 | 0 | 0 |
| 4530 | Cattle | Central  | 0 | 0 | 0 | 0 | 0 | 0 |
| 4531 | Cattle | Central  | 0 | 0 | 0 | 0 | 0 | 0 |
| 4532 | Cattle | Central  | 0 | 0 | 0 | 0 | 0 | 0 |
| 4533 | Cattle | Central  | 0 | 0 | 0 | 0 | 0 | 0 |
| 4534 | Cattle | Central  | 0 | 0 | 0 | 0 | 0 | 0 |
| 4535 | Cattle | Central  | 0 | 0 | 0 | 0 | 0 | 0 |
| 4536 | Cattle | Central  | 0 | 0 | 0 | 0 | 0 | 0 |
| 4537 | Cattle | Central  | 0 | 0 | 0 | 0 | 0 | 0 |
| 4538 | Cattle | Central  | 0 | 0 | 0 | 0 | 0 | 0 |
| 4539 | Cattle | Central  | 0 | 0 | 0 | 0 | 0 | 0 |
| 4540 | Cattle | Central  | 0 | 0 | 0 | 0 | 0 | 0 |
| 4541 | Cattle | Central  | 0 | 0 | 0 | 0 | 0 | 0 |
| 4542 | Cattle | Central  | 0 | 0 | 0 | 0 | 0 | 0 |
| 4543 | Cattle | Central  | 0 | 0 | 0 | 0 | 0 | 0 |
| 4544 | Cattle | Central  | 0 | 0 | 1 | 1 | 0 | 1 |
| 4545 | Cattle | Central  | 0 | 0 | 0 | 0 | 0 | 0 |
| 4546 | Cattle | Central  | 0 | 0 | 0 | 1 | 0 | 1 |
| 4547 | Cattle | Central  | 0 | 0 | 1 | 1 | 0 | 1 |
| 4548 | Cattle | Central  | 0 | 0 | 0 | 0 | 0 | 0 |
| 4549 | Cattle | Central  | 0 | 0 | 0 | 0 | 0 | 0 |
| 4550 | Cattle | Central  | 0 | 0 | 1 | 1 | 0 | 1 |
| 4551 | Cattle | Central  | 0 | 0 | 0 | 0 | 0 | 0 |
| 4552 | Cattle | Central  | 0 | 0 | 0 | 1 | 0 | 1 |
| 4553 | Cattle | Central  | 0 | 0 | 1 | 1 | 0 | 1 |
| 4554 | Cattle | Eastern  | 0 | 0 | 0 | 0 | 0 | 0 |
| 4555 | Cattle | Eastern  | 0 | 0 | 0 | 0 | 0 | 0 |
| 4556 | Cattle | Eastern  | 0 | 0 | 0 | 0 | 0 | 0 |
| 4557 | Cattle | Eastern  | 0 | 0 | 0 | 0 | 0 | 0 |
| 4558 | Cattle | Eastern  | 0 | 0 | 0 | 0 | 0 | 0 |
| 4559 | Cattle | Eastern  | 0 | 0 | 1 | 1 | 0 | 1 |

|      |        |              |   |   |   |   |   |   |
|------|--------|--------------|---|---|---|---|---|---|
| 4560 | Cattle | Eastern      | 0 | 0 | 1 | 1 | 0 | 1 |
| 4561 | Cattle | Eastern      | 0 | 0 | 0 | 0 | 0 | 0 |
| 4562 | Cattle | Eastern      | 0 | 0 | 0 | 0 | 0 | 0 |
| 4563 | Cattle | Eastern      | 0 | 0 | 0 | 0 | 0 | 0 |
| 4564 | Cattle | Eastern      | 0 | 0 | 0 | 0 | 0 | 0 |
| 4565 | Cattle | Eastern      | 0 | 0 | 1 | 0 | 0 | 1 |
| 4566 | Cattle | Eastern      | 0 | 0 | 0 | 0 | 0 | 0 |
| 4567 | Cattle | Eastern      | 0 | 0 | 1 | 1 | 0 | 1 |
| 4568 | Cattle | Eastern      | 0 | 0 | 1 | 0 | 0 | 1 |
| 4569 | Cattle | Eastern      | 0 | 0 | 1 | 0 | 0 | 1 |
| 4570 | Cattle | Eastern      | 0 | 0 | 1 | 1 | 0 | 1 |
| 4571 | Cattle | Eastern      | 0 | 0 | 1 | 0 | 0 | 1 |
| 4572 | Cattle | Eastern      | 0 | 0 | 1 | 0 | 0 | 1 |
| 4573 | Cattle | Eastern      | 0 | 0 | 0 | 0 | 0 | 0 |
| 4574 | Cattle | Eastern      | 0 | 0 | 0 | 0 | 0 | 0 |
| 4575 | Cattle | Eastern      | 0 | 1 | 1 | 1 | 0 | 1 |
| 4576 | Cattle | Eastern      | 0 | 0 | 0 | 0 | 0 | 0 |
| 4577 | Cattle | Eastern      | 0 | 0 | 0 | 0 | 0 | 0 |
| 4578 | Cattle | Eastern      | 0 | 0 | 0 | 0 | 0 | 0 |
| 4579 | Cattle | Eastern      | 0 | 0 | 0 | 0 | 0 | 0 |
| 4580 | Cattle | Eastern      | 0 | 0 | 0 | 0 | 0 | 0 |
| 4581 | Cattle | Eastern      | 0 | 0 | 0 | 0 | 0 | 0 |
| 4582 | Cattle | Eastern      | 0 | 0 | 0 | 0 | 0 | 0 |
| 4583 | Cattle | Northeastern | 0 | 1 | 0 | 0 | 0 | 1 |
| 4584 | Cattle | Northeastern | 0 | 1 | 0 | 0 | 0 | 1 |
| 4585 | Cattle | Northeastern | 0 | 1 | 0 | 0 | 0 | 1 |
| 4586 | Cattle | Northeastern | 0 | 1 | 0 | 0 | 0 | 1 |
| 4587 | Cattle | Northeastern | 0 | 1 | 0 | 0 | 0 | 1 |
| 4588 | Cattle | Northeastern | 0 | 0 | 1 | 1 | 0 | 1 |
| 4589 | Cattle | Northeastern | 0 | 0 | 0 | 1 | 0 | 1 |
| 4590 | Cattle | Northeastern | 0 | 1 | 0 | 0 | 0 | 1 |
| 4591 | Cattle | Northeastern | 0 | 1 | 0 | 0 | 0 | 1 |
| 4592 | Cattle | Northeastern | 0 | 1 | 0 | 0 | 0 | 1 |
| 4593 | Cattle | Northeastern | 0 | 1 | 0 | 0 | 0 | 1 |
| 4594 | Cattle | Northeastern | 0 | 1 | 0 | 0 | 0 | 1 |
| 4595 | Cattle | Northeastern | 0 | 0 | 0 | 0 | 0 | 0 |
| 4596 | Cattle | Northeastern | 0 | 0 | 0 | 0 | 0 | 0 |
| 4597 | Cattle | Southern     | 0 | 0 | 0 | 0 | 0 | 0 |
| 4598 | Cattle | Southern     | 0 | 0 | 1 | 1 | 0 | 1 |
| 4599 | Cattle | Southern     | 0 | 0 | 0 | 0 | 0 | 0 |
| 4600 | Cattle | Southern     | 0 | 0 | 0 | 0 | 0 | 0 |
| 4601 | Cattle | Southern     | 0 | 0 | 0 | 0 | 0 | 0 |
| 4602 | Cattle | Southern     | 0 | 0 | 0 | 0 | 0 | 0 |
| 4603 | Cattle | Southern     | 0 | 0 | 0 | 0 | 0 | 0 |
| 4604 | Cattle | Southern     | 0 | 0 | 0 | 1 | 0 | 1 |
| 4605 | Cattle | Southern     | 0 | 0 | 0 | 0 | 0 | 1 |
| 4606 | Cattle | Southern     | 0 | 0 | 0 | 0 | 0 | 0 |
| 4607 | Cattle | Central      | 0 | 0 | 0 | 0 | 0 | 0 |



|      |        |              |   |   |   |   |   |   |
|------|--------|--------------|---|---|---|---|---|---|
| 4608 | Cattle | Central      | 0 | 0 | 0 | 0 | 0 | 0 |
| 4609 | Cattle | Central      | 0 | 0 | 0 | 0 | 0 | 0 |
| 4610 | Cattle | Central      | 0 | 0 | 0 | 1 | 1 | 1 |
| 4611 | Cattle | Central      | 0 | 0 | 0 | 0 | 0 | 0 |
| 4612 | Cattle | Central      | 0 | 0 | 0 | 0 | 0 | 0 |
| 4613 | Cattle | Central      | 0 | 0 | 0 | 1 | 0 | 1 |
| 4614 | Cattle | Central      | 0 | 0 | 0 | 0 | 0 | 0 |
| 4615 | Cattle | Central      | 0 | 0 | 0 | 0 | 0 | 0 |
| 4616 | Cattle | Central      | 0 | 0 | 0 | 0 | 0 | 0 |
| 4617 | Cattle | Central      | 0 | 0 | 1 | 1 | 0 | 1 |
| 4618 | Cattle | Central      | 0 | 0 | 0 | 0 | 0 | 0 |
| 4619 | Cattle | Central      | 0 | 0 | 0 | 0 | 0 | 0 |
| 4620 | Cattle | Central      | 0 | 0 | 1 | 1 | 0 | 1 |
| 4621 | Cattle | Central      | 0 | 0 | 0 | 1 | 0 | 1 |
| 4622 | Cattle | Central      | 0 | 0 | 0 | 0 | 0 | 0 |
| 4623 | Cattle | Central      | 0 | 0 | 0 | 1 | 0 | 1 |
| 4624 | Cattle | Central      | 0 | 0 | 1 | 1 | 0 | 1 |
| 4625 | Cattle | Central      | 0 | 0 | 0 | 1 | 1 | 1 |
| 4626 | Cattle | Central      | 0 | 0 | 1 | 1 | 0 | 1 |
| 4627 | Cattle | Central      | 0 | 0 | 0 | 0 | 0 | 0 |
| 4628 | Cattle | Central      | 0 | 0 | 0 | 0 | 0 | 0 |
| 4629 | Cattle | Central      | 0 | 0 | 0 | 0 | 0 | 0 |
| 4630 | Cattle | Central      | 0 | 0 | 0 | 0 | 0 | 0 |
| 4631 | Cattle | Central      | 0 | 0 | 0 | 0 | 0 | 0 |
| 4632 | Cattle | Central      | 0 | 0 | 0 | 0 | 0 | 0 |
| 4633 | Cattle | Central      | 0 | 0 | 0 | 0 | 0 | 0 |
| 4634 | Cattle | Central      | 0 | 0 | 0 | 1 | 0 | 1 |
| 4635 | Cattle | Central      | 0 | 0 | 0 | 0 | 0 | 0 |
| 4636 | Cattle | Central      | 0 | 0 | 0 | 0 | 0 | 0 |
| 4637 | Cattle | Central      | 0 | 0 | 0 | 0 | 0 | 0 |
| 4638 | Cattle | Central      | 0 | 0 | 0 | 0 | 0 | 0 |
| 4639 | Cattle | Central      | 0 | 0 | 0 | 0 | 0 | 0 |
| 4640 | Cattle | Central      | 0 | 0 | 1 | 1 | 0 | 1 |
| 4641 | Cattle | Central      | 0 | 0 | 1 | 1 | 0 | 1 |
| 4642 | Cattle | Central      | 0 | 0 | 1 | 1 | 0 | 1 |
| 4643 | Cattle | Central      | 0 | 0 | 1 | 1 | 0 | 1 |
| 4644 | Cattle | Central      | 0 | 0 | 0 | 0 | 0 | 0 |
| 4645 | Cattle | Central      | 0 | 0 | 1 | 1 | 0 | 1 |
| 4646 | Cattle | Central      | 0 | 0 | 0 | 1 | 0 | 1 |
| 4647 | Cattle | Northeastern | 0 | 0 | 0 | 0 | 0 | 0 |
| 4648 | Cattle | Northeastern | 0 | 0 | 0 | 1 | 0 | 1 |
| 4649 | Cattle | Northeastern | 0 | 0 | 0 | 1 | 0 | 1 |
| 4650 | Cattle | Northeastern | 0 | 0 | 0 | 0 | 0 | 0 |
| 4651 | Cattle | Northeastern | 0 | 0 | 0 | 0 | 0 | 0 |
| 4652 | Cattle | Northeastern | 0 | 0 | 0 | 1 | 0 | 1 |
| 4653 | Cattle | Northeastern | 0 | 0 | 1 | 1 | 0 | 1 |
| 4654 | Cattle | Northeastern | 0 | 0 | 0 | 0 | 0 | 0 |
| 4655 | Cattle | Northeastern | 0 | 0 | 0 | 1 | 0 | 1 |

|      |        |              |   |   |   |   |   |   |
|------|--------|--------------|---|---|---|---|---|---|
| 4656 | Cattle | Northeastern | 0 | 0 | 0 | 1 | 0 | 1 |
| 4657 | Cattle | Northeastern | 0 | 0 | 0 | 0 | 0 | 0 |
| 4658 | Cattle | Northeastern | 0 | 0 | 0 | 0 | 0 | 0 |
| 4659 | Cattle | Northeastern | 0 | 0 | 1 | 1 | 0 | 1 |
| 4660 | Cattle | Northeastern | 0 | 0 | 0 | 1 | 0 | 1 |
| 4661 | Cattle | Northeastern | 0 | 0 | 0 | 0 | 0 | 0 |
| 4662 | Cattle | Northeastern | 0 | 0 | 0 | 0 | 0 | 0 |
| 4663 | Cattle | Northeastern | 0 | 0 | 0 | 0 | 0 | 0 |
| 4664 | Cattle | Northeastern | 0 | 0 | 0 | 1 | 0 | 1 |
| 4665 | Cattle | Northeastern | 0 | 0 | 0 | 1 | 0 | 1 |
| 4666 | Cattle | Northeastern | 0 | 0 | 0 | 1 | 0 | 1 |
| 4667 | Cattle | Northeastern | 0 | 0 | 0 | 0 | 0 | 0 |
| 4668 | Cattle | Northeastern | 0 | 0 | 0 | 1 | 0 | 1 |
| 4669 | Cattle | Northeastern | 0 | 0 | 1 | 1 | 0 | 1 |
| 4670 | Cattle | Northeastern | 0 | 0 | 0 | 0 | 0 | 0 |
| 4671 | Cattle | Northeastern | 0 | 0 | 1 | 1 | 0 | 1 |
| 4672 | Cattle | Northeastern | 0 | 0 | 1 | 1 | 0 | 1 |
| 4673 | Cattle | Northeastern | 0 | 0 | 0 | 1 | 0 | 1 |
| 4674 | Cattle | Northeastern | 0 | 0 | 1 | 1 | 0 | 1 |
| 4675 | Cattle | Northeastern | 0 | 0 | 1 | 1 | 0 | 1 |
| 4676 | Cattle | Northeastern | 0 | 1 | 0 | 1 | 0 | 1 |
| 4677 | Cattle | Northeastern | 0 | 0 | 0 | 0 | 0 | 0 |
| 4678 | Cattle | Central      | 0 | 0 | 1 | 1 | 0 | 1 |
| 4679 | Cattle | Central      | 0 | 0 | 1 | 1 | 0 | 1 |
| 4680 | Cattle | Central      | 0 | 0 | 1 | 1 | 0 | 1 |
| 4681 | Cattle | Central      | 0 | 0 | 1 | 1 | 0 | 1 |
| 4682 | Cattle | Central      | 0 | 0 | 0 | 0 | 0 | 0 |
| 4683 | Cattle | Central      | 0 | 0 | 1 | 0 | 0 | 1 |
| 4684 | Cattle | Central      | 0 | 0 | 0 | 1 | 0 | 1 |
| 4685 | Cattle | Central      | 0 | 0 | 1 | 1 | 1 | 1 |
| 4686 | Cattle | Central      | 0 | 0 | 1 | 1 | 0 | 1 |
| 4687 | Cattle | Central      | 0 | 0 | 1 | 0 | 0 | 1 |
| 4688 | Cattle | Central      | 0 | 0 | 1 | 1 | 0 | 1 |
| 4689 | Cattle | Central      | 0 | 0 | 1 | 1 | 0 | 1 |
| 4690 | Cattle | Central      | 0 | 0 | 1 | 0 | 0 | 1 |
| 4691 | Cattle | Central      | 0 | 0 | 0 | 1 | 0 | 1 |
| 4692 | Cattle | Central      | 0 | 0 | 0 | 0 | 0 | 0 |
| 4693 | Cattle | Central      | 0 | 0 | 0 | 0 | 0 | 0 |
| 4694 | Cattle | Central      | 0 | 0 | 0 | 1 | 0 | 1 |
| 4695 | Cattle | Central      | 0 | 0 | 1 | 1 | 0 | 1 |
| 4696 | Cattle | Central      | 0 | 0 | 1 | 1 | 0 | 1 |
| 4697 | Cattle | Central      | 0 | 0 | 0 | 0 | 0 | 0 |
| 4698 | Cattle | Central      | 0 | 0 | 0 | 0 | 0 | 0 |
| 4699 | Cattle | Central      | 0 | 0 | 1 | 0 | 0 | 1 |
| 4700 | Cattle | Central      | 0 | 0 | 1 | 1 | 0 | 1 |
| 4701 | Cattle | Central      | 0 | 0 | 0 | 0 | 0 | 0 |
| 4702 | Cattle | Central      | 0 | 0 | 1 | 0 | 1 | 1 |
| 4703 | Cattle | Central      | 0 | 0 | 1 | 1 | 0 | 1 |

|      |        |              |   |   |   |   |   |   |
|------|--------|--------------|---|---|---|---|---|---|
| 4704 | Cattle | Central      | 0 | 0 | 0 | 0 | 0 | 0 |
| 4705 | Cattle | Central      | 0 | 0 | 0 | 0 | 0 | 0 |
| 4706 | Cattle | Central      | 0 | 0 | 0 | 0 | 1 | 1 |
| 4707 | Cattle | Central      | 0 | 0 | 0 | 0 | 0 | 0 |
| 4708 | Cattle | Central      | 0 | 0 | 0 | 0 | 0 | 0 |
| 4709 | Cattle | Central      | 0 | 0 | 1 | 1 | 0 | 1 |
| 4710 | Cattle | Central      | 0 | 0 | 1 | 0 | 0 | 1 |
| 4711 | Cattle | Central      | 0 | 0 | 1 | 0 | 0 | 1 |
| 4712 | Cattle | Central      | 0 | 0 | 1 | 0 | 0 | 1 |
| 4713 | Cattle | Central      | 0 | 0 | 0 | 0 | 0 | 0 |
| 4714 | Cattle | Central      | 0 | 0 | 0 | 0 | 0 | 0 |
| 4715 | Cattle | Central      | 0 | 0 | 1 | 1 | 0 | 1 |
| 4716 | Cattle | Central      | 0 | 0 | 1 | 1 | 0 | 1 |
| 4717 | Cattle | Central      | 0 | 0 | 0 | 0 | 0 | 0 |
| 4718 | Cattle | Central      | 0 | 0 | 1 | 0 | 0 | 1 |
| 4719 | Cattle | Central      | 0 | 0 | 1 | 1 | 0 | 1 |
| 4720 | Cattle | Central      | 0 | 0 | 0 | 0 | 0 | 0 |
| 4721 | Cattle | Central      | 0 | 0 | 1 | 0 | 0 | 1 |
| 4722 | Cattle | Central      | 0 | 0 | 1 | 1 | 0 | 1 |
| 4723 | Cattle | Central      | 0 | 0 | 1 | 1 | 0 | 1 |
| 4724 | Cattle | Central      | 0 | 0 | 1 | 1 | 0 | 1 |
| 4725 | Cattle | Central      | 0 | 1 | 1 | 1 | 0 | 1 |
| 4726 | Cattle | Central      | 0 | 0 | 1 | 1 | 0 | 1 |
| 4727 | Cattle | Central      | 0 | 0 | 1 | 0 | 0 | 1 |
| 4728 | Cattle | Eastern      | 0 | 0 | 1 | 1 | 0 | 1 |
| 4729 | Cattle | Eastern      | 0 | 0 | 1 | 1 | 0 | 1 |
| 4730 | Cattle | Eastern      | 0 | 0 | 1 | 1 | 0 | 1 |
| 4731 | Cattle | Southern     | 0 | 0 | 0 | 0 | 0 | 0 |
| 4732 | Cattle | Southern     | 0 | 0 | 0 | 0 | 0 | 0 |
| 4733 | Cattle | Southern     | 0 | 0 | 1 | 1 | 0 | 1 |
| 4734 | Cattle | Southern     | 0 | 0 | 0 | 0 | 0 | 0 |
| 4735 | Cattle | Southern     | 0 | 0 | 0 | 0 | 0 | 0 |
| 4736 | Cattle | Southern     | 0 | 0 | 1 | 1 | 0 | 1 |
| 4737 | Cattle | Southern     | 0 | 0 | 1 | 1 | 0 | 1 |
| 4738 | Cattle | Southern     | 0 | 0 | 0 | 0 | 0 | 0 |
| 4739 | Cattle | Eastern      | 0 | 0 | 1 | 1 | 0 | 1 |
| 4740 | Cattle | Eastern      | 0 | 0 | 1 | 1 | 0 | 1 |
| 4741 | Cattle | Eastern      | 0 | 0 | 1 | 1 | 0 | 1 |
| 4742 | Cattle | Eastern      | 0 | 0 | 1 | 1 | 0 | 1 |
| 4743 | Cattle | Eastern      | 0 | 0 | 1 | 1 | 0 | 1 |
| 4744 | Cattle | Northeastern | 0 | 0 | 0 | 0 | 0 | 1 |
| 4745 | Cattle | Northeastern | 0 | 0 | 1 | 0 | 0 | 1 |
| 4746 | Cattle | Northeastern | 0 | 0 | 0 | 0 | 0 | 1 |
| 4747 | Cattle | Northeastern | 0 | 0 | 1 | 0 | 0 | 1 |
| 4748 | Cattle | Northern     | 0 | 0 | 0 | 0 | 0 | 0 |
| 4749 | Cattle | Northern     | 0 | 0 | 0 | 0 | 0 | 0 |
| 4750 | Cattle | Northern     | 0 | 0 | 1 | 0 | 0 | 1 |
| 4751 | Cattle | Northern     | 0 | 0 | 0 | 0 | 0 | 0 |

|      |        |              |   |   |   |   |   |   |
|------|--------|--------------|---|---|---|---|---|---|
| 4752 | Cattle | Northern     | 0 | 0 | 1 | 1 | 0 | 1 |
| 4753 | Cattle | Northern     | 0 | 0 | 0 | 0 | 0 | 0 |
| 4754 | Cattle | Northern     | 0 | 0 | 1 | 0 | 0 | 1 |
| 4755 | Cattle | Northern     | 0 | 0 | 1 | 0 | 0 | 1 |
| 4756 | Cattle | Northern     | 0 | 0 | 0 | 0 | 0 | 0 |
| 4757 | Cattle | Northern     | 0 | 0 | 1 | 0 | 0 | 1 |
| 4758 | Cattle | Northern     | 0 | 0 | 1 | 0 | 0 | 1 |
| 4759 | Cattle | Northern     | 0 | 0 | 1 | 0 | 0 | 1 |
| 4760 | Cattle | Northern     | 0 | 0 | 0 | 0 | 0 | 0 |
| 4761 | Cattle | Northern     | 0 | 0 | 1 | 1 | 0 | 1 |
| 4762 | Cattle | Northern     | 0 | 0 | 0 | 0 | 0 | 0 |
| 4763 | Cattle | Northern     | 0 | 0 | 1 | 1 | 0 | 1 |
| 4764 | Cattle | Northern     | 0 | 0 | 1 | 1 | 0 | 1 |
| 4765 | Cattle | Eastern      | 0 | 0 | 0 | 0 | 0 | 0 |
| 4766 | Cattle | Eastern      | 0 | 0 | 0 | 0 | 0 | 0 |
| 4767 | Cattle | Eastern      | 0 | 0 | 0 | 0 | 0 | 0 |
| 4768 | Cattle | Eastern      | 0 | 0 | 0 | 0 | 0 | 0 |
| 4769 | Cattle | Eastern      | 0 | 0 | 1 | 1 | 0 | 1 |
| 4770 | Cattle | Eastern      | 0 | 0 | 0 | 0 | 0 | 0 |
| 4771 | Cattle | Eastern      | 0 | 0 | 0 | 0 | 0 | 0 |
| 4772 | Cattle | Eastern      | 0 | 0 | 0 | 0 | 0 | 0 |
| 4773 | Cattle | Eastern      | 0 | 0 | 0 | 0 | 0 | 0 |
| 4774 | Cattle | Eastern      | 0 | 0 | 0 | 0 | 0 | 0 |
| 4775 | Cattle | Eastern      | 0 | 0 | 1 | 1 | 0 | 1 |
| 4776 | Cattle | Eastern      | 0 | 0 | 0 | 0 | 0 | 0 |
| 4777 | Cattle | Eastern      | 0 | 0 | 0 | 0 | 0 | 0 |
| 4778 | Cattle | Eastern      | 0 | 0 | 1 | 1 | 0 | 1 |
| 4779 | Cattle | Eastern      | 0 | 0 | 0 | 0 | 0 | 0 |
| 4780 | Cattle | Eastern      | 0 | 0 | 0 | 0 | 0 | 0 |
| 4781 | Cattle | Eastern      | 0 | 0 | 0 | 0 | 0 | 0 |
| 4782 | Cattle | Eastern      | 0 | 0 | 0 | 0 | 0 | 0 |
| 4783 | Cattle | Eastern      | 0 | 0 | 1 | 1 | 0 | 1 |
| 4784 | Cattle | Eastern      | 0 | 0 | 0 | 0 | 0 | 0 |
| 4785 | Cattle | Eastern      | 0 | 0 | 0 | 0 | 0 | 0 |
| 4786 | Cattle | Eastern      | 0 | 0 | 0 | 0 | 0 | 0 |
| 4787 | Cattle | Eastern      | 0 | 0 | 0 | 0 | 0 | 0 |
| 4788 | Cattle | Eastern      | 0 | 0 | 0 | 0 | 0 | 0 |
| 4789 | Cattle | Eastern      | 0 | 0 | 0 | 0 | 0 | 0 |
| 4790 | Cattle | Eastern      | 0 | 0 | 0 | 0 | 0 | 0 |
| 4791 | Cattle | Eastern      | 0 | 0 | 0 | 0 | 0 | 0 |
| 4792 | Cattle | Eastern      | 0 | 0 | 0 | 0 | 0 | 0 |
| 4793 | Cattle | Eastern      | 0 | 0 | 0 | 0 | 0 | 0 |
| 4794 | Cattle | Northeastern | 0 | 0 | 0 | 0 | 0 | 0 |
| 4795 | Cattle | Northeastern | 0 | 0 | 0 | 0 | 0 | 0 |
| 4796 | Cattle | Northeastern | 0 | 0 | 0 | 0 | 0 | 0 |
| 4797 | Cattle | Northeastern | 0 | 0 | 0 | 1 | 0 | 1 |
| 4798 | Cattle | Northeastern | 0 | 0 | 0 | 1 | 0 | 1 |
| 4799 | Cattle | Northeastern | 0 | 0 | 0 | 0 | 0 | 0 |

|      |        |              |   |   |   |   |   |   |
|------|--------|--------------|---|---|---|---|---|---|
| 4800 | Cattle | Northeastern | 0 | 0 | 0 | 0 | 0 | 0 |
| 4801 | Cattle | Northeastern | 0 | 0 | 0 | 0 | 0 | 0 |
| 4802 | Cattle | Northeastern | 0 | 0 | 0 | 0 | 0 | 0 |
| 4803 | Cattle | Northeastern | 0 | 0 | 0 | 0 | 0 | 0 |
| 4804 | Cattle | Northeastern | 0 | 0 | 0 | 1 | 0 | 1 |
| 4805 | Cattle | Northeastern | 0 | 0 | 0 | 1 | 0 | 1 |
| 4806 | Cattle | Northeastern | 0 | 0 | 0 | 0 | 0 | 0 |
| 4807 | Cattle | Northeastern | 0 | 0 | 0 | 0 | 0 | 0 |
| 4808 | Cattle | Northeastern | 0 | 0 | 0 | 0 | 0 | 0 |
| 4809 | Cattle | Northeastern | 0 | 0 | 0 | 0 | 0 | 0 |
| 4810 | Cattle | Eastern      | 0 | 0 | 0 | 1 | 0 | 1 |
| 4811 | Cattle | Eastern      | 0 | 0 | 0 | 0 | 0 | 1 |
| 4812 | Cattle | Eastern      | 0 | 0 | 0 | 0 | 0 | 1 |
| 4813 | Cattle | Eastern      | 0 | 0 | 0 | 0 | 0 | 0 |
| 4814 | Cattle | Eastern      | 0 | 0 | 0 | 0 | 0 | 1 |
| 4815 | Cattle | Eastern      | 0 | 0 | 0 | 0 | 0 | 1 |
| 4816 | Cattle | Eastern      | 0 | 0 | 0 | 0 | 0 | 0 |
| 4817 | Cattle | Eastern      | 0 | 0 | 1 | 0 | 0 | 1 |
| 4818 | Cattle | Eastern      | 0 | 0 | 0 | 0 | 0 | 0 |
| 4819 | Cattle | Eastern      | 0 | 0 | 0 | 0 | 0 | 0 |
| 4820 | Cattle | Eastern      | 0 | 0 | 1 | 1 | 0 | 1 |
| 4821 | Cattle | Eastern      | 0 | 0 | 0 | 0 | 0 | 0 |
| 4822 | Cattle | Eastern      | 0 | 0 | 0 | 0 | 0 | 0 |
| 4823 | Cattle | Eastern      | 0 | 0 | 0 | 0 | 0 | 0 |
| 4824 | Cattle | Eastern      | 0 | 0 | 0 | 1 | 0 | 1 |
| 4825 | Cattle | Eastern      | 0 | 0 | 0 | 0 | 0 | 0 |
| 4826 | Cattle | Eastern      | 0 | 0 | 0 | 0 | 0 | 0 |
| 4827 | Cattle | Eastern      | 0 | 0 | 0 | 0 | 0 | 1 |
| 4828 | Cattle | Eastern      | 0 | 0 | 1 | 1 | 0 | 1 |
| 4829 | Cattle | Eastern      | 0 | 0 | 0 | 0 | 0 | 0 |
| 4830 | Cattle | Eastern      | 0 | 1 | 0 | 0 | 0 | 1 |
| 4831 | Cattle | Eastern      | 0 | 0 | 0 | 0 | 0 | 0 |
| 4832 | Cattle | Eastern      | 0 | 0 | 0 | 0 | 0 | 0 |
| 4833 | Cattle | Eastern      | 0 | 0 | 0 | 0 | 0 | 0 |
| 4834 | Cattle | Eastern      | 0 | 0 | 0 | 0 | 0 | 0 |
| 4835 | Cattle | Eastern      | 0 | 0 | 0 | 0 | 0 | 0 |
| 4836 | Cattle | Eastern      | 0 | 0 | 0 | 0 | 0 | 0 |
| 4837 | Cattle | Eastern      | 0 | 0 | 0 | 0 | 0 | 1 |
| 4838 | Cattle | Eastern      | 0 | 0 | 0 | 0 | 0 | 0 |
| 4839 | Cattle | Eastern      | 0 | 0 | 0 | 0 | 0 | 0 |
| 4840 | Cattle | Eastern      | 0 | 0 | 0 | 0 | 0 | 0 |
| 4841 | Cattle | Eastern      | 0 | 1 | 1 | 1 | 0 | 1 |
| 4842 | Cattle | Eastern      | 0 | 0 | 0 | 0 | 0 | 0 |
| 4843 | Cattle | Eastern      | 0 | 0 | 0 | 0 | 0 | 0 |
| 4844 | Cattle | Eastern      | 0 | 0 | 0 | 0 | 0 | 0 |
| 4845 | Cattle | Eastern      | 0 | 0 | 0 | 0 | 0 | 0 |
| 4846 | Cattle | Eastern      | 0 | 0 | 0 | 0 | 0 | 0 |
| 4847 | Cattle | Eastern      | 0 | 0 | 0 | 0 | 0 | 0 |

|      |        |              |   |   |   |   |   |   |
|------|--------|--------------|---|---|---|---|---|---|
| 4848 | Cattle | Eastern      | 0 | 0 | 0 | 0 | 0 | 0 |
| 4849 | Cattle | Eastern      | 0 | 0 | 1 | 1 | 0 | 1 |
| 4850 | Cattle | Eastern      | 0 | 0 | 0 | 0 | 0 | 0 |
| 4851 | Cattle | Eastern      | 0 | 0 | 0 | 0 | 0 | 0 |
| 4852 | Cattle | Eastern      | 0 | 0 | 0 | 0 | 0 | 0 |
| 4853 | Cattle | Eastern      | 0 | 0 | 0 | 0 | 0 | 0 |
| 4854 | Cattle | Eastern      | 0 | 0 | 0 | 0 | 0 | 0 |
| 4855 | Cattle | Eastern      | 0 | 0 | 0 | 0 | 0 | 0 |
| 4856 | Cattle | Eastern      | 0 | 0 | 0 | 0 | 0 | 0 |
| 4857 | Cattle | Eastern      | 0 | 0 | 0 | 0 | 0 | 0 |
| 4858 | Cattle | Eastern      | 0 | 0 | 1 | 1 | 0 | 1 |
| 4859 | Cattle | Eastern      | 0 | 0 | 0 | 0 | 0 | 0 |
| 4860 | Cattle | Eastern      | 0 | 1 | 0 | 0 | 0 | 1 |
| 4861 | Cattle | Eastern      | 0 | 0 | 1 | 1 | 0 | 1 |
| 4862 | Cattle | Eastern      | 0 | 0 | 0 | 0 | 0 | 0 |
| 4863 | Cattle | Eastern      | 0 | 0 | 0 | 0 | 0 | 0 |
| 4864 | Cattle | Eastern      | 0 | 0 | 1 | 0 | 0 | 1 |
| 4865 | Cattle | Eastern      | 0 | 0 | 1 | 1 | 0 | 1 |
| 4866 | Cattle | Eastern      | 0 | 0 | 0 | 0 | 0 | 0 |
| 4867 | Cattle | Eastern      | 0 | 0 | 0 | 0 | 0 | 0 |
| 4868 | Cattle | Eastern      | 0 | 0 | 1 | 0 | 0 | 1 |
| 4869 | Cattle | Eastern      | 0 | 0 | 1 | 0 | 0 | 1 |
| 4870 | Cattle | Eastern      | 0 | 0 | 1 | 0 | 0 | 1 |
| 4871 | Cattle | Eastern      | 0 | 0 | 0 | 1 | 0 | 1 |
| 4872 | Cattle | Eastern      | 0 | 0 | 0 | 0 | 0 | 0 |
| 4873 | Cattle | Eastern      | 0 | 0 | 1 | 0 | 0 | 1 |
| 4874 | Cattle | Eastern      | 0 | 0 | 1 | 1 | 0 | 1 |
| 4875 | Cattle | Eastern      | 0 | 0 | 1 | 1 | 0 | 1 |
| 4876 | Cattle | Central      | 0 | 0 | 0 | 0 | 0 | 0 |
| 4877 | Cattle | Central      | 0 | 0 | 0 | 0 | 0 | 0 |
| 4878 | Cattle | Northeastern | 0 | 0 | 1 | 0 | 0 | 1 |
| 4879 | Cattle | Northeastern | 0 | 0 | 1 | 0 | 0 | 1 |
| 4880 | Cattle | Northeastern | 0 | 0 | 1 | 1 | 0 | 1 |
| 4881 | Cattle | Northeastern | 0 | 0 | 1 | 0 | 0 | 1 |
| 4882 | Cattle | Northeastern | 0 | 0 | 0 | 0 | 0 | 0 |
| 4883 | Cattle | Northeastern | 0 | 0 | 1 | 1 | 0 | 1 |
| 4884 | Cattle | Northeastern | 0 | 0 | 1 | 0 | 0 | 1 |
| 4885 | Cattle | Northeastern | 0 | 0 | 1 | 1 | 0 | 1 |
| 4886 | Cattle | Northeastern | 0 | 0 | 1 | 0 | 0 | 1 |
| 4887 | Cattle | Northeastern | 0 | 0 | 1 | 0 | 0 | 1 |
| 4888 | Cattle | Central      | 0 | 0 | 1 | 0 | 0 | 1 |
| 4889 | Cattle | Central      | 0 | 0 | 1 | 0 | 0 | 1 |
| 4890 | Cattle | Central      | 0 | 0 | 1 | 1 | 0 | 1 |
| 4891 | Cattle | Central      | 0 | 0 | 1 | 0 | 0 | 1 |
| 4892 | Cattle | Central      | 0 | 0 | 1 | 1 | 0 | 1 |
| 4893 | Cattle | Central      | 0 | 0 | 0 | 0 | 0 | 0 |
| 4894 | Cattle | Northeastern | 0 | 0 | 1 | 0 | 0 | 1 |
| 4895 | Cattle | Northeastern | 0 | 0 | 0 | 0 | 0 | 0 |

|      |        |              |   |   |   |   |   |   |
|------|--------|--------------|---|---|---|---|---|---|
| 4896 | Cattle | Northeastern | 0 | 0 | 1 | 1 | 0 | 1 |
| 4897 | Cattle | Northeastern | 0 | 0 | 1 | 0 | 0 | 1 |
| 4898 | Cattle | Northeastern | 0 | 0 | 1 | 0 | 0 | 1 |
| 4899 | Cattle | Northeastern | 0 | 0 | 0 | 1 | 0 | 1 |
| 4900 | Cattle | Northeastern | 0 | 0 | 0 | 0 | 0 | 0 |
| 4901 | Cattle | Northeastern | 0 | 0 | 0 | 0 | 0 | 0 |
| 4902 | Cattle | Northeastern | 0 | 0 | 1 | 1 | 0 | 1 |
| 4903 | Cattle | Northeastern | 0 | 0 | 1 | 1 | 0 | 1 |
| 4904 | Cattle | Northeastern | 0 | 0 | 0 | 0 | 0 | 0 |
| 4905 | Cattle | Northeastern | 0 | 0 | 0 | 0 | 0 | 0 |
| 4906 | Cattle | Northeastern | 0 | 0 | 1 | 0 | 0 | 1 |
| 4907 | Cattle | Northeastern | 0 | 0 | 1 | 0 | 0 | 1 |
| 4908 | Cattle | Northeastern | 0 | 0 | 1 | 0 | 0 | 1 |
| 4909 | Cattle | Northeastern | 0 | 0 | 1 | 0 | 0 | 1 |
| 4910 | Cattle | Northeastern | 0 | 0 | 1 | 1 | 0 | 1 |
| 4911 | Cattle | Northeastern | 0 | 0 | 1 | 1 | 0 | 1 |
| 4912 | Cattle | Northeastern | 0 | 0 | 1 | 1 | 0 | 1 |
| 4913 | Cattle | Northeastern | 0 | 0 | 1 | 0 | 0 | 1 |
| 4914 | Cattle | Northeastern | 0 | 0 | 0 | 0 | 0 | 0 |
| 4915 | Cattle | Northeastern | 0 | 0 | 1 | 0 | 0 | 1 |
| 4916 | Cattle | Northeastern | 0 | 0 | 1 | 1 | 0 | 1 |
| 4917 | Cattle | Northeastern | 0 | 0 | 1 | 1 | 0 | 1 |
| 4918 | Cattle | Northeastern | 0 | 0 | 1 | 0 | 0 | 1 |
| 4919 | Cattle | Northeastern | 0 | 0 | 0 | 0 | 0 | 0 |
| 4920 | Cattle | Northeastern | 0 | 0 | 1 | 0 | 0 | 1 |
| 4921 | Cattle | Northeastern | 0 | 0 | 1 | 0 | 0 | 1 |
| 4922 | Cattle | Northeastern | 0 | 0 | 1 | 0 | 0 | 1 |
| 4923 | Cattle | Northeastern | 0 | 0 | 1 | 0 | 0 | 1 |
| 4924 | Cattle | Northeastern | 0 | 0 | 1 | 0 | 0 | 1 |
| 4925 | Cattle | Central      | 0 | 0 | 1 | 1 | 0 | 1 |
| 4926 | Cattle | Central      | 0 | 0 | 1 | 1 | 0 | 1 |
| 4927 | Cattle | Central      | 0 | 0 | 1 | 0 | 0 | 1 |
| 4928 | Cattle | Central      | 0 | 0 | 0 | 0 | 0 | 0 |
| 4929 | Cattle | Central      | 0 | 0 | 1 | 1 | 0 | 1 |
| 4930 | Cattle | Central      | 0 | 0 | 1 | 1 | 0 | 1 |
| 4931 | Cattle | Central      | 0 | 0 | 1 | 0 | 0 | 1 |
| 4932 | Cattle | Central      | 0 | 0 | 1 | 1 | 0 | 1 |
| 4933 | Cattle | Central      | 0 | 0 | 1 | 1 | 0 | 1 |
| 4934 | Cattle | Central      | 0 | 0 | 1 | 0 | 0 | 1 |
| 4935 | Cattle | Central      | 0 | 0 | 1 | 1 | 0 | 1 |
| 4936 | Cattle | Central      | 0 | 0 | 1 | 1 | 0 | 1 |
| 4937 | Cattle | Central      | 0 | 0 | 1 | 0 | 0 | 1 |
| 4938 | Cattle | Central      | 0 | 0 | 1 | 1 | 0 | 1 |
| 4939 | Cattle | Central      | 0 | 0 | 1 | 0 | 0 | 1 |
| 4940 | Cattle | Central      | 0 | 0 | 1 | 0 | 0 | 1 |
| 4941 | Cattle | Central      | 0 | 0 | 1 | 0 | 0 | 1 |
| 4942 | Cattle | Central      | 0 | 0 | 1 | 0 | 0 | 1 |
| 4943 | Cattle | Central      | 0 | 0 | 1 | 0 | 0 | 1 |

|      |        |              |   |   |   |   |   |   |
|------|--------|--------------|---|---|---|---|---|---|
| 4944 | Cattle | Central      | 0 | 0 | 1 | 1 | 0 | 1 |
| 4945 | Cattle | Central      | 0 | 0 | 0 | 0 | 0 | 0 |
| 4946 | Cattle | Central      | 0 | 0 | 1 | 1 | 0 | 1 |
| 4947 | Cattle | Central      | 0 | 0 | 1 | 1 | 0 | 1 |
| 4948 | Cattle | Central      | 0 | 0 | 0 | 0 | 0 | 0 |
| 4949 | Cattle | Central      | 0 | 0 | 1 | 1 | 0 | 1 |
| 4950 | Cattle | Central      | 0 | 0 | 0 | 0 | 0 | 0 |
| 4951 | Cattle | Central      | 0 | 0 | 1 | 1 | 0 | 1 |
| 4952 | Cattle | Central      | 0 | 0 | 1 | 1 | 0 | 1 |
| 4953 | Cattle | Central      | 0 | 0 | 1 | 1 | 0 | 1 |
| 4954 | Cattle | Central      | 0 | 0 | 0 | 0 | 0 | 0 |
| 4955 | Cattle | Central      | 0 | 0 | 1 | 0 | 0 | 1 |
| 4956 | Cattle | Central      | 0 | 0 | 1 | 1 | 0 | 1 |
| 4957 | Cattle | Central      | 0 | 0 | 1 | 1 | 0 | 1 |
| 4958 | Cattle | Eastern      | 0 | 0 | 1 | 1 | 0 | 1 |
| 4959 | Cattle | Eastern      | 0 | 0 | 0 | 0 | 0 | 0 |
| 4960 | Cattle | Eastern      | 0 | 0 | 0 | 0 | 0 | 0 |
| 4961 | Cattle | Northeastern | 0 | 0 | 0 | 0 | 0 | 0 |
| 4962 | Cattle | Northeastern | 0 | 0 | 1 | 0 | 0 | 1 |
| 4963 | Cattle | Central      | 0 | 0 | 1 | 1 | 0 | 1 |
| 4964 | Cattle | Central      | 0 | 0 | 0 | 0 | 0 | 0 |
| 4965 | Cattle | Central      | 0 | 0 | 1 | 0 | 0 | 1 |
| 4966 | Cattle | Central      | 0 | 0 | 1 | 1 | 0 | 1 |
| 4967 | Cattle | Central      | 0 | 0 | 1 | 1 | 0 | 1 |
| 4968 | Cattle | Central      | 0 | 0 | 1 | 1 | 0 | 1 |
| 4969 | Cattle | Central      | 0 | 0 | 0 | 0 | 0 | 0 |
| 4970 | Cattle | Central      | 0 | 0 | 1 | 1 | 0 | 1 |
| 4971 | Cattle | Central      | 0 | 0 | 0 | 1 | 0 | 1 |
| 4972 | Cattle | Central      | 0 | 0 | 1 | 1 | 0 | 1 |
| 4973 | Cattle | Central      | 0 | 0 | 1 | 0 | 0 | 1 |
| 4974 | Cattle | Central      | 0 | 0 | 1 | 0 | 0 | 1 |
| 4975 | Cattle | Central      | 0 | 0 | 1 | 1 | 0 | 1 |
| 4976 | Cattle | Central      | 0 | 0 | 1 | 0 | 0 | 1 |
| 4977 | Cattle | Central      | 0 | 0 | 1 | 0 | 0 | 1 |
| 4978 | Cattle | Central      | 0 | 0 | 1 | 0 | 0 | 1 |
| 4979 | Cattle | Central      | 0 | 0 | 1 | 1 | 0 | 1 |
| 4980 | Cattle | Central      | 0 | 0 | 1 | 1 | 0 | 1 |
| 4981 | Cattle | Central      | 0 | 0 | 1 | 1 | 0 | 1 |
| 4982 | Cattle | Central      | 0 | 0 | 1 | 1 | 0 | 1 |
| 4983 | Cattle | Central      | 0 | 0 | 1 | 0 | 0 | 1 |
| 4984 | Cattle | Central      | 0 | 0 | 1 | 0 | 0 | 1 |
| 4985 | Cattle | Central      | 0 | 0 | 1 | 0 | 0 | 1 |
| 4986 | Cattle | Central      | 0 | 0 | 1 | 0 | 0 | 1 |
| 4987 | Cattle | Central      | 0 | 0 | 1 | 1 | 1 | 1 |
| 4988 | Cattle | Central      | 0 | 0 | 1 | 0 | 0 | 1 |
| 4989 | Cattle | Central      | 0 | 0 | 1 | 0 | 0 | 1 |
| 4990 | Cattle | Central      | 0 | 0 | 1 | 1 | 0 | 1 |
| 4991 | Cattle | Central      | 0 | 0 | 1 | 1 | 0 | 1 |



|      |        |              |   |   |   |   |   |   |
|------|--------|--------------|---|---|---|---|---|---|
| 4992 | Cattle | Central      | 0 | 0 | 1 | 1 | 1 | 1 |
| 4993 | Cattle | Central      | 0 | 0 | 1 | 0 | 0 | 1 |
| 4994 | Cattle | Central      | 0 | 0 | 0 | 0 | 0 | 0 |
| 4995 | Cattle | Central      | 0 | 0 | 1 | 0 | 0 | 1 |
| 4996 | Cattle | Central      | 0 | 0 | 0 | 0 | 0 | 0 |
| 4997 | Cattle | Central      | 0 | 0 | 0 | 0 | 0 | 0 |
| 4998 | Cattle | Central      | 0 | 0 | 1 | 0 | 0 | 1 |
| 4999 | Cattle | Central      | 0 | 0 | 0 | 0 | 0 | 0 |
| 5000 | Cattle | Central      | 0 | 0 | 1 | 0 | 0 | 1 |
| 5001 | Cattle | Central      | 0 | 0 | 0 | 0 | 0 | 0 |
| 5002 | Cattle | Central      | 0 | 0 | 0 | 0 | 0 | 0 |
| 5003 | Cattle | Central      | 0 | 0 | 0 | 0 | 0 | 0 |
| 5004 | Cattle | Central      | 0 | 0 | 0 | 0 | 0 | 0 |
| 5005 | Cattle | Central      | 0 | 0 | 0 | 0 | 0 | 0 |
| 5006 | Cattle | Central      | 0 | 0 | 0 | 0 | 0 | 0 |
| 5007 | Cattle | Central      | 0 | 0 | 0 | 0 | 0 | 0 |
| 5008 | Cattle | Central      | 0 | 0 | 0 | 0 | 0 | 0 |
| 5009 | Cattle | Central      | 0 | 0 | 0 | 0 | 0 | 0 |
| 5010 | Cattle | Central      | 0 | 0 | 0 | 0 | 0 | 0 |
| 5011 | Cattle | Central      | 0 | 0 | 0 | 0 | 0 | 0 |
| 5012 | Cattle | Central      | 0 | 0 | 0 | 0 | 0 | 0 |
| 5013 | Cattle | Central      | 0 | 0 | 0 | 0 | 0 | 0 |
| 5014 | Cattle | Central      | 0 | 0 | 0 | 0 | 0 | 0 |
| 5015 | Cattle | Central      | 0 | 0 | 0 | 0 | 0 | 0 |
| 5016 | Cattle | Central      | 0 | 0 | 0 | 0 | 0 | 0 |
| 5017 | Cattle | Central      | 0 | 0 | 0 | 0 | 0 | 0 |
| 5018 | Cattle | Central      | 0 | 0 | 1 | 0 | 0 | 1 |
| 5019 | Cattle | Central      | 0 | 0 | 0 | 0 | 0 | 0 |
| 5020 | Cattle | Central      | 0 | 0 | 0 | 0 | 0 | 0 |
| 5021 | Cattle | Central      | 0 | 0 | 0 | 0 | 0 | 0 |
| 5022 | Cattle | Central      | 0 | 0 | 0 | 0 | 0 | 0 |
| 5023 | Cattle | Central      | 0 | 0 | 0 | 0 | 0 | 0 |
| 5024 | Cattle | Central      | 0 | 0 | 0 | 0 | 0 | 0 |
| 5025 | Cattle | Central      | 0 | 0 | 0 | 0 | 0 | 0 |
| 5026 | Cattle | Central      | 0 | 0 | 0 | 0 | 0 | 0 |
| 5027 | Cattle | Central      | 0 | 0 | 0 | 0 | 0 | 0 |
| 5028 | Cattle | Central      | 0 | 0 | 1 | 1 | 0 | 1 |
| 5029 | Cattle | Central      | 0 | 0 | 1 | 0 | 0 | 1 |
| 5030 | Cattle | Central      | 0 | 0 | 1 | 1 | 0 | 1 |
| 5031 | Cattle | Central      | 0 | 0 | 1 | 0 | 0 | 1 |
| 5032 | Cattle | Central      | 0 | 0 | 0 | 1 | 0 | 1 |
| 5033 | Cattle | Central      | 0 | 0 | 1 | 0 | 0 | 1 |
| 5034 | Cattle | Central      | 0 | 1 | 1 | 1 | 0 | 1 |
| 5035 | Cattle | Central      | 0 | 0 | 0 | 0 | 0 | 0 |
| 5036 | Cattle | Central      | 0 | 0 | 0 | 1 | 0 | 1 |
| 5037 | Cattle | Central      | 0 | 0 | 0 | 0 | 0 | 0 |
| 5038 | Cattle | Central      | 0 | 0 | 0 | 0 | 0 | 0 |
| 5039 | Cattle | Northeastern | 0 | 0 | 0 | 0 | 0 | 0 |

|      |        |              |   |   |   |   |   |   |
|------|--------|--------------|---|---|---|---|---|---|
| 5040 | Cattle | Northeastern | 0 | 0 | 0 | 0 | 0 | 0 |
| 5041 | Cattle | Northeastern | 0 | 0 | 1 | 1 | 0 | 1 |
| 5042 | Cattle | Northeastern | 0 | 0 | 0 | 0 | 0 | 0 |
| 5043 | Cattle | Northeastern | 0 | 0 | 0 | 0 | 0 | 0 |
| 5044 | Cattle | Northeastern | 0 | 0 | 1 | 0 | 0 | 1 |
| 5045 | Cattle | Northeastern | 0 | 0 | 0 | 0 | 0 | 0 |
| 5046 | Cattle | Northeastern | 0 | 0 | 0 | 0 | 0 | 0 |
| 5047 | Cattle | Northeastern | 0 | 0 | 1 | 0 | 0 | 1 |
| 5048 | Cattle | Northeastern | 0 | 0 | 0 | 0 | 0 | 0 |
| 5049 | Cattle | Northeastern | 0 | 0 | 1 | 0 | 0 | 1 |
| 5050 | Cattle | Northeastern | 0 | 0 | 0 | 0 | 0 | 0 |
| 5051 | Cattle | Northeastern | 0 | 0 | 0 | 0 | 0 | 0 |
| 5052 | Cattle | Northeastern | 0 | 0 | 0 | 0 | 0 | 0 |
| 5053 | Cattle | Northeastern | 0 | 0 | 1 | 0 | 0 | 1 |
| 5054 | Cattle | Northeastern | 0 | 0 | 1 | 0 | 0 | 1 |
| 5055 | Cattle | Northeastern | 0 | 0 | 1 | 0 | 0 | 1 |
| 5056 | Cattle | Northeastern | 0 | 0 | 1 | 0 | 0 | 1 |
| 5057 | Cattle | Northeastern | 0 | 0 | 1 | 1 | 0 | 1 |
| 5058 | Cattle | Northeastern | 0 | 0 | 1 | 0 | 0 | 1 |
| 5059 | Cattle | Northeastern | 0 | 0 | 1 | 0 | 0 | 1 |
| 5060 | Cattle | Northeastern | 0 | 0 | 0 | 0 | 0 | 0 |
| 5061 | Cattle | Northeastern | 0 | 0 | 0 | 0 | 0 | 0 |
| 5062 | Cattle | Northeastern | 0 | 0 | 1 | 0 | 0 | 1 |
| 5063 | Cattle | Northeastern | 0 | 0 | 0 | 0 | 0 | 0 |
| 5064 | Cattle | Northeastern | 0 | 0 | 0 | 0 | 0 | 0 |
| 5065 | Cattle | Northeastern | 0 | 0 | 1 | 0 | 0 | 1 |
| 5066 | Cattle | Northeastern | 0 | 0 | 1 | 0 | 0 | 1 |
| 5067 | Cattle | Northeastern | 0 | 0 | 0 | 0 | 0 | 0 |
| 5068 | Cattle | Northeastern | 0 | 0 | 0 | 0 | 0 | 0 |
| 5069 | Cattle | Northeastern | 0 | 0 | 1 | 0 | 0 | 1 |
| 5070 | Cattle | Northeastern | 0 | 0 | 1 | 0 | 0 | 1 |
| 5071 | Cattle | Northeastern | 0 | 0 | 1 | 0 | 0 | 1 |
| 5072 | Cattle | Northeastern | 0 | 0 | 1 | 0 | 0 | 1 |
| 5073 | Cattle | Northeastern | 0 | 0 | 1 | 1 | 0 | 1 |
| 5074 | Cattle | Northeastern | 0 | 0 | 1 | 1 | 0 | 1 |
| 5075 | Cattle | Northeastern | 0 | 0 | 0 | 0 | 0 | 0 |
| 5076 | Cattle | Northeastern | 0 | 1 | 1 | 0 | 0 | 1 |
| 5077 | Cattle | Northeastern | 0 | 0 | 1 | 0 | 0 | 1 |
| 5078 | Cattle | Northeastern | 0 | 0 | 1 | 0 | 0 | 1 |
| 5079 | Cattle | Northeastern | 0 | 0 | 0 | 0 | 0 | 0 |
| 5080 | Cattle | Northeastern | 0 | 0 | 0 | 0 | 0 | 0 |
| 5081 | Cattle | Northeastern | 0 | 0 | 0 | 0 | 0 | 0 |
| 5082 | Cattle | Northeastern | 0 | 1 | 1 | 0 | 0 | 1 |
| 5083 | Cattle | Northeastern | 0 | 0 | 0 | 0 | 0 | 0 |
| 5084 | Cattle | Northeastern | 0 | 0 | 0 | 0 | 0 | 0 |
| 5085 | Cattle | Northeastern | 0 | 0 | 0 | 0 | 0 | 0 |
| 5086 | Cattle | Northeastern | 0 | 0 | 1 | 0 | 0 | 1 |
| 5087 | Cattle | Northeastern | 0 | 0 | 0 | 0 | 0 | 0 |

|      |        |              |   |   |   |   |   |   |
|------|--------|--------------|---|---|---|---|---|---|
| 5088 | Cattle | Northeastern | 0 | 0 | 0 | 0 | 0 | 0 |
| 5089 | Cattle | Northeastern | 0 | 0 | 0 | 0 | 0 | 0 |
| 5090 | Cattle | Northeastern | 0 | 0 | 1 | 0 | 0 | 1 |
| 5091 | Cattle | Northeastern | 0 | 0 | 0 | 0 | 0 | 0 |
| 5092 | Cattle | Northeastern | 0 | 1 | 1 | 0 | 0 | 1 |
| 5093 | Cattle | Northeastern | 0 | 0 | 1 | 0 | 0 | 1 |
| 5094 | Cattle | Northeastern | 0 | 0 | 1 | 0 | 0 | 1 |
| 5095 | Cattle | Northeastern | 0 | 0 | 0 | 0 | 0 | 0 |
| 5096 | Cattle | Northeastern | 0 | 0 | 0 | 0 | 0 | 0 |
| 5097 | Cattle | Northeastern | 0 | 0 | 0 | 0 | 0 | 0 |
| 5098 | Cattle | Northeastern | 0 | 1 | 0 | 0 | 0 | 1 |
| 5099 | Cattle | Northeastern | 0 | 0 | 0 | 0 | 0 | 0 |
| 5100 | Cattle | Northeastern | 0 | 0 | 0 | 0 | 0 | 0 |
| 5101 | Cattle | Northeastern | 0 | 0 | 0 | 0 | 0 | 0 |
| 5102 | Cattle | Northeastern | 0 | 0 | 1 | 1 | 0 | 1 |
| 5103 | Cattle | Northeastern | 0 | 0 | 1 | 0 | 0 | 1 |
| 5104 | Cattle | Northeastern | 0 | 0 | 1 | 0 | 0 | 1 |
| 5105 | Cattle | Northeastern | 0 | 0 | 1 | 0 | 0 | 1 |
| 5106 | Cattle | Northeastern | 0 | 0 | 1 | 1 | 0 | 1 |
| 5107 | Cattle | Northeastern | 0 | 0 | 0 | 0 | 0 | 0 |
| 5108 | Cattle | Northeastern | 0 | 0 | 1 | 0 | 0 | 1 |
| 5109 | Cattle | Northeastern | 0 | 0 | 1 | 1 | 0 | 1 |
| 5110 | Cattle | Northeastern | 0 | 0 | 1 | 1 | 1 | 1 |
| 5111 | Cattle | Northeastern | 0 | 0 | 1 | 0 | 0 | 1 |
| 5112 | Cattle | Northeastern | 0 | 0 | 1 | 0 | 0 | 1 |
| 5113 | Cattle | Northeastern | 0 | 0 | 0 | 0 | 0 | 0 |
| 5114 | Cattle | Northeastern | 0 | 0 | 0 | 0 | 0 | 0 |
| 5115 | Cattle | Northeastern | 0 | 0 | 1 | 0 | 0 | 1 |
| 5116 | Cattle | Northeastern | 0 | 0 | 1 | 0 | 0 | 1 |
| 5117 | Cattle | Northeastern | 0 | 0 | 1 | 0 | 0 | 1 |
| 5118 | Cattle | Northeastern | 0 | 0 | 0 | 0 | 0 | 0 |
| 5119 | Cattle | Northeastern | 0 | 0 | 0 | 0 | 0 | 0 |
| 5120 | Cattle | Northeastern | 0 | 0 | 1 | 0 | 0 | 1 |
| 5121 | Cattle | Northeastern | 0 | 0 | 0 | 0 | 0 | 0 |
| 5122 | Cattle | Northeastern | 0 | 0 | 0 | 0 | 0 | 0 |
| 5123 | Cattle | Northeastern | 0 | 0 | 0 | 0 | 0 | 0 |
| 5124 | Cattle | Northeastern | 0 | 0 | 1 | 0 | 0 | 1 |
| 5125 | Cattle | Northeastern | 0 | 0 | 0 | 0 | 0 | 0 |
| 5126 | Cattle | Northeastern | 0 | 0 | 0 | 0 | 0 | 0 |
| 5127 | Cattle | Northeastern | 0 | 0 | 0 | 0 | 0 | 0 |
| 5128 | Cattle | Northeastern | 0 | 0 | 0 | 0 | 0 | 0 |
| 5129 | Cattle | Northeastern | 0 | 0 | 0 | 0 | 0 | 0 |
| 5130 | Cattle | Northeastern | 0 | 0 | 0 | 0 | 0 | 0 |
| 5131 | Cattle | Northeastern | 0 | 0 | 0 | 0 | 0 | 0 |
| 5132 | Cattle | Northeastern | 0 | 0 | 1 | 0 | 0 | 1 |
| 5133 | Cattle | Northeastern | 0 | 0 | 0 | 0 | 0 | 0 |
| 5134 | Cattle | Northeastern | 0 | 0 | 0 | 0 | 0 | 0 |
| 5135 | Cattle | Northeastern | 0 | 0 | 0 | 0 | 0 | 0 |

|      |        |              |   |   |   |   |   |   |
|------|--------|--------------|---|---|---|---|---|---|
| 5136 | Cattle | Northeastern | 0 | 0 | 0 | 0 | 0 | 0 |
| 5137 | Cattle | Northeastern | 0 | 0 | 0 | 0 | 1 | 1 |
| 5138 | Cattle | Northeastern | 0 | 0 | 0 | 0 | 0 | 0 |
| 5139 | Cattle | Northeastern | 0 | 0 | 0 | 0 | 0 | 0 |
| 5140 | Cattle | Northeastern | 0 | 0 | 0 | 0 | 0 | 0 |
| 5141 | Cattle | Northeastern | 0 | 0 | 0 | 0 | 0 | 0 |
| 5142 | Cattle | Northeastern | 0 | 0 | 0 | 0 | 0 | 0 |
| 5143 | Cattle | Northeastern | 0 | 0 | 0 | 0 | 0 | 0 |
| 5144 | Cattle | Northeastern | 0 | 0 | 0 | 0 | 0 | 0 |
| 5145 | Cattle | Northeastern | 0 | 0 | 0 | 0 | 0 | 0 |
| 5146 | Cattle | Northeastern | 0 | 0 | 1 | 0 | 0 | 1 |
| 5147 | Cattle | Northeastern | 0 | 0 | 0 | 0 | 0 | 0 |
| 5148 | Cattle | Northeastern | 0 | 0 | 0 | 0 | 0 | 0 |
| 5149 | Cattle | Northeastern | 0 | 0 | 0 | 0 | 0 | 0 |
| 5150 | Cattle | Northeastern | 0 | 0 | 0 | 0 | 0 | 0 |
| 5151 | Cattle | Northeastern | 0 | 0 | 0 | 0 | 0 | 0 |
| 5152 | Cattle | Northeastern | 0 | 0 | 1 | 0 | 0 | 1 |
| 5153 | Cattle | Northeastern | 0 | 0 | 0 | 0 | 0 | 0 |
| 5154 | Cattle | Central      | 0 | 0 | 0 | 0 | 0 | 0 |
| 5155 | Cattle | Central      | 0 | 0 | 1 | 0 | 0 | 1 |
| 5156 | Cattle | Central      | 0 | 0 | 1 | 0 | 0 | 1 |
| 5157 | Cattle | Central      | 0 | 0 | 1 | 0 | 0 | 1 |
| 5158 | Cattle | Central      | 0 | 0 | 0 | 0 | 0 | 0 |
| 5159 | Cattle | Central      | 0 | 0 | 1 | 0 | 0 | 1 |
| 5160 | Cattle | Central      | 0 | 0 | 0 | 0 | 0 | 0 |
| 5161 | Cattle | Central      | 0 | 0 | 0 | 0 | 0 | 0 |
| 5162 | Cattle | Central      | 0 | 0 | 0 | 0 | 0 | 0 |
| 5163 | Cattle | Central      | 0 | 0 | 0 | 0 | 0 | 0 |
| 5164 | Cattle | Central      | 0 | 0 | 0 | 0 | 0 | 0 |
| 5165 | Cattle | Central      | 0 | 0 | 1 | 0 | 0 | 1 |
| 5166 | Cattle | Central      | 0 | 0 | 0 | 0 | 0 | 0 |
| 5167 | Cattle | Central      | 0 | 0 | 1 | 0 | 0 | 1 |
| 5168 | Cattle | Central      | 0 | 0 | 0 | 0 | 0 | 0 |
| 5169 | Cattle | Central      | 0 | 0 | 1 | 1 | 0 | 1 |
| 5170 | Cattle | Central      | 0 | 0 | 1 | 0 | 0 | 1 |
| 5171 | Cattle | Central      | 0 | 0 | 0 | 0 | 0 | 0 |
| 5172 | Cattle | Central      | 0 | 0 | 0 | 0 | 0 | 0 |
| 5173 | Cattle | Central      | 0 | 0 | 1 | 0 | 0 | 1 |
| 5174 | Cattle | Southern     | 0 | 0 | 1 | 0 | 0 | 1 |
| 5175 | Cattle | Southern     | 0 | 0 | 1 | 0 | 0 | 1 |
| 5176 | Cattle | Southern     | 0 | 0 | 0 | 0 | 0 | 0 |
| 5177 | Cattle | Central      | 0 | 0 | 0 | 0 | 0 | 0 |
| 5178 | Cattle | Central      | 0 | 1 | 1 | 0 | 0 | 1 |
| 5179 | Cattle | Central      | 0 | 0 | 0 | 0 | 0 | 0 |
| 5180 | Cattle | Central      | 0 | 0 | 0 | 0 | 0 | 0 |
| 5181 | Cattle | Central      | 0 | 0 | 0 | 0 | 0 | 0 |
| 5182 | Cattle | Central      | 0 | 0 | 0 | 0 | 0 | 0 |
| 5183 | Cattle | Eastern      | 0 | 0 | 0 | 0 | 0 | 0 |

|      |        |              |   |   |   |   |   |   |
|------|--------|--------------|---|---|---|---|---|---|
| 5184 | Cattle | Eastern      | 0 | 0 | 0 | 0 | 0 | 0 |
| 5185 | Cattle | Eastern      | 0 | 0 | 1 | 0 | 0 | 1 |
| 5186 | Cattle | Eastern      | 0 | 0 | 1 | 1 | 0 | 1 |
| 5187 | Cattle | Eastern      | 0 | 0 | 1 | 1 | 0 | 1 |
| 5188 | Cattle | Eastern      | 0 | 0 | 0 | 0 | 0 | 0 |
| 5189 | Cattle | Eastern      | 0 | 0 | 0 | 0 | 0 | 0 |
| 5190 | Cattle | Eastern      | 0 | 0 | 1 | 0 | 0 | 1 |
| 5191 | Cattle | Eastern      | 0 | 0 | 0 | 1 | 0 | 1 |
| 5192 | Cattle | Eastern      | 0 | 0 | 1 | 0 | 0 | 1 |
| 5193 | Cattle | Eastern      | 0 | 0 | 1 | 1 | 0 | 1 |
| 5194 | Cattle | Eastern      | 0 | 0 | 1 | 0 | 0 | 1 |
| 5195 | Cattle | Eastern      | 0 | 0 | 0 | 0 | 0 | 0 |
| 5196 | Cattle | Eastern      | 0 | 0 | 1 | 0 | 0 | 1 |
| 5197 | Cattle | Eastern      | 0 | 0 | 1 | 0 | 0 | 1 |
| 5198 | Cattle | Eastern      | 0 | 0 | 1 | 0 | 0 | 1 |
| 5199 | Cattle | Eastern      | 0 | 0 | 1 | 0 | 0 | 1 |
| 5200 | Cattle | Eastern      | 0 | 0 | 1 | 0 | 0 | 1 |
| 5201 | Cattle | Eastern      | 0 | 0 | 0 | 0 | 0 | 0 |
| 5202 | Cattle | Eastern      | 0 | 0 | 0 | 0 | 0 | 0 |
| 5203 | Cattle | Eastern      | 0 | 0 | 1 | 0 | 0 | 1 |
| 5204 | Cattle | Eastern      | 0 | 0 | 0 | 0 | 0 | 0 |
| 5205 | Cattle | Southern     | 0 | 0 | 1 | 1 | 0 | 1 |
| 5206 | Cattle | Southern     | 0 | 0 | 1 | 0 | 0 | 1 |
| 5207 | Cattle | Southern     | 0 | 0 | 0 | 0 | 0 | 0 |
| 5208 | Cattle | Northeastern | 0 | 0 | 0 | 0 | 0 | 1 |
| 5209 | Cattle | Northeastern | 0 | 0 | 1 | 1 | 0 | 1 |
| 5210 | Cattle | Northeastern | 0 | 0 | 1 | 1 | 0 | 1 |
| 5211 | Cattle | Northeastern | 0 | 0 | 1 | 1 | 0 | 1 |
| 5212 | Cattle | Northeastern | 0 | 0 | 0 | 0 | 0 | 0 |
| 5213 | Cattle | Northeastern | 0 | 0 | 1 | 1 | 0 | 1 |
| 5214 | Cattle | Northeastern | 0 | 0 | 1 | 1 | 0 | 1 |
| 5215 | Cattle | Northeastern | 0 | 0 | 0 | 1 | 0 | 1 |
| 5216 | Cattle | Northeastern | 0 | 0 | 0 | 1 | 0 | 1 |
| 5217 | Cattle | Northeastern | 0 | 0 | 1 | 1 | 0 | 1 |
| 5218 | Cattle | Northeastern | 0 | 0 | 1 | 1 | 0 | 1 |
| 5219 | Cattle | Northeastern | 0 | 0 | 1 | 1 | 0 | 1 |
| 5220 | Cattle | Northeastern | 0 | 0 | 1 | 1 | 0 | 1 |
| 5221 | Cattle | Central      | 0 | 0 | 0 | 0 | 0 | 0 |
| 5222 | Cattle | Central      | 0 | 0 | 0 | 0 | 0 | 0 |
| 5223 | Cattle | Central      | 0 | 0 | 1 | 0 | 0 | 1 |
| 5224 | Cattle | Central      | 0 | 0 | 1 | 0 | 0 | 1 |
| 5225 | Cattle | Central      | 0 | 1 | 1 | 0 | 0 | 1 |
| 5226 | Cattle | Central      | 0 | 0 | 0 | 0 | 0 | 0 |
| 5227 | Cattle | Central      | 0 | 0 | 1 | 1 | 0 | 1 |
| 5228 | Cattle | Central      | 0 | 0 | 1 | 0 | 0 | 1 |
| 5229 | Cattle | Central      | 0 | 0 | 1 | 1 | 0 | 1 |
| 5230 | Cattle | Central      | 0 | 0 | 0 | 0 | 0 | 0 |
| 5231 | Cattle | Central      | 0 | 0 | 0 | 0 | 0 | 0 |

|      |        |              |   |   |   |   |   |   |
|------|--------|--------------|---|---|---|---|---|---|
| 5232 | Cattle | Central      | 0 | 0 | 1 | 1 | 0 | 1 |
| 5233 | Cattle | Central      | 0 | 0 | 0 | 1 | 0 | 1 |
| 5234 | Cattle | Central      | 0 | 0 | 0 | 0 | 0 | 0 |
| 5235 | Cattle | Central      | 0 | 0 | 0 | 0 | 0 | 0 |
| 5236 | Cattle | Central      | 0 | 0 | 1 | 1 | 0 | 1 |
| 5237 | Cattle | Central      | 0 | 0 | 0 | 0 | 0 | 0 |
| 5238 | Cattle | Central      | 0 | 0 | 1 | 0 | 0 | 1 |
| 5239 | Cattle | Central      | 0 | 0 | 0 | 0 | 0 | 0 |
| 5240 | Cattle | Central      | 0 | 0 | 0 | 0 | 0 | 0 |
| 5241 | Cattle | Central      | 0 | 0 | 0 | 0 | 0 | 0 |
| 5242 | Cattle | Central      | 0 | 0 | 1 | 1 | 0 | 1 |
| 5243 | Cattle | Central      | 0 | 0 | 1 | 1 | 0 | 1 |
| 5244 | Cattle | Central      | 0 | 0 | 0 | 1 | 0 | 1 |
| 5245 | Cattle | Central      | 0 | 0 | 1 | 0 | 0 | 1 |
| 5246 | Cattle | Central      | 0 | 0 | 0 | 1 | 0 | 1 |
| 5247 | Cattle | Central      | 0 | 0 | 0 | 0 | 0 | 0 |
| 5248 | Cattle | Central      | 0 | 0 | 0 | 0 | 0 | 0 |
| 5249 | Cattle | Central      | 0 | 0 | 0 | 0 | 0 | 0 |
| 5250 | Cattle | Central      | 0 | 0 | 0 | 1 | 0 | 1 |
| 5251 | Cattle | Central      | 0 | 0 | 1 | 0 | 0 | 1 |
| 5252 | Cattle | Central      | 0 | 0 | 0 | 0 | 0 | 0 |
| 5253 | Cattle | Central      | 0 | 0 | 0 | 0 | 0 | 0 |
| 5254 | Cattle | Central      | 0 | 0 | 0 | 0 | 0 | 0 |
| 5255 | Cattle | Central      | 0 | 0 | 1 | 1 | 0 | 1 |
| 5256 | Cattle | Central      | 0 | 1 | 1 | 0 | 0 | 1 |
| 5257 | Cattle | Central      | 0 | 0 | 0 | 0 | 0 | 0 |
| 5258 | Cattle | Northeastern | 0 | 0 | 0 | 0 | 0 | 0 |
| 5259 | Cattle | Northeastern | 0 | 0 | 0 | 0 | 0 | 0 |
| 5260 | Cattle | Northeastern | 0 | 0 | 1 | 0 | 0 | 1 |
| 5261 | Cattle | Northeastern | 0 | 0 | 0 | 0 | 0 | 0 |
| 5262 | Cattle | Northeastern | 0 | 0 | 1 | 0 | 0 | 1 |
| 5263 | Cattle | Northeastern | 0 | 0 | 0 | 0 | 0 | 0 |
| 5264 | Cattle | Northeastern | 0 | 0 | 1 | 0 | 0 | 1 |
| 5265 | Cattle | Northeastern | 0 | 0 | 1 | 0 | 0 | 1 |
| 5266 | Cattle | Northeastern | 0 | 0 | 0 | 0 | 0 | 0 |
| 5267 | Cattle | Northeastern | 0 | 0 | 1 | 0 | 0 | 1 |
| 5268 | Cattle | Northeastern | 0 | 0 | 0 | 0 | 0 | 0 |
| 5269 | Cattle | Northeastern | 0 | 0 | 0 | 1 | 0 | 1 |
| 5270 | Cattle | Northeastern | 0 | 0 | 1 | 1 | 0 | 1 |
| 5271 | Cattle | Northeastern | 0 | 0 | 0 | 0 | 0 | 0 |
| 5272 | Cattle | Northeastern | 0 | 0 | 0 | 0 | 0 | 0 |
| 5273 | Cattle | Northeastern | 0 | 0 | 0 | 0 | 0 | 0 |
| 5274 | Cattle | Northeastern | 0 | 0 | 0 | 0 | 0 | 0 |
| 5275 | Cattle | Northeastern | 0 | 0 | 0 | 0 | 0 | 0 |
| 5276 | Cattle | Northeastern | 0 | 0 | 1 | 0 | 0 | 1 |
| 5277 | Cattle | Central      | 0 | 0 | 0 | 0 | 0 | 0 |
| 5278 | Cattle | Central      | 0 | 0 | 0 | 0 | 0 | 0 |
| 5279 | Cattle | Central      | 0 | 0 | 0 | 0 | 0 | 0 |

|      |        |          |   |   |   |   |   |   |
|------|--------|----------|---|---|---|---|---|---|
| 5280 | Cattle | Central  | 0 | 0 | 1 | 0 | 0 | 1 |
| 5281 | Cattle | Central  | 0 | 1 | 1 | 0 | 0 | 1 |
| 5282 | Cattle | Central  | 0 | 0 | 0 | 0 | 0 | 0 |
| 5283 | Cattle | Central  | 0 | 0 | 1 | 1 | 0 | 1 |
| 5284 | Cattle | Central  | 0 | 0 | 1 | 0 | 0 | 1 |
| 5285 | Cattle | Central  | 0 | 0 | 1 | 0 | 0 | 1 |
| 5286 | Cattle | Central  | 0 | 0 | 0 | 0 | 0 | 0 |
| 5287 | Cattle | Central  | 0 | 0 | 1 | 0 | 0 | 1 |
| 5288 | Cattle | Central  | 0 | 0 | 1 | 1 | 0 | 1 |
| 5289 | Cattle | Central  | 0 | 0 | 0 | 0 | 0 | 0 |
| 5290 | Cattle | Central  | 0 | 0 | 0 | 0 | 0 | 0 |
| 5291 | Cattle | Central  | 0 | 0 | 0 | 0 | 0 | 0 |
| 5292 | Cattle | Central  | 0 | 0 | 1 | 1 | 0 | 1 |
| 5293 | Cattle | Central  | 0 | 0 | 0 | 0 | 0 | 0 |
| 5294 | Cattle | Central  | 0 | 0 | 1 | 0 | 0 | 1 |
| 5295 | Cattle | Central  | 0 | 0 | 0 | 0 | 0 | 0 |
| 5296 | Cattle | Central  | 0 | 0 | 0 | 0 | 0 | 0 |
| 5297 | Cattle | Central  | 0 | 0 | 0 | 0 | 0 | 0 |
| 5298 | Cattle | Central  | 0 | 0 | 1 | 1 | 0 | 1 |
| 5299 | Cattle | Central  | 0 | 0 | 1 | 1 | 0 | 1 |
| 5300 | Cattle | Central  | 0 | 0 | 0 | 0 | 0 | 0 |
| 5301 | Cattle | Central  | 0 | 0 | 1 | 1 | 0 | 1 |
| 5302 | Cattle | Central  | 0 | 0 | 0 | 0 | 0 | 0 |
| 5303 | Cattle | Central  | 0 | 0 | 0 | 0 | 0 | 0 |
| 5304 | Cattle | Central  | 0 | 0 | 0 | 0 | 0 | 0 |
| 5305 | Cattle | Central  | 0 | 0 | 1 | 1 | 0 | 1 |
| 5306 | Cattle | Central  | 0 | 0 | 1 | 0 | 0 | 1 |
| 5307 | Cattle | Central  | 0 | 0 | 1 | 0 | 0 | 1 |
| 5308 | Cattle | Northern | 0 | 0 | 0 | 0 | 0 | 0 |
| 5309 | Cattle | Northern | 0 | 0 | 0 | 0 | 0 | 0 |
| 5310 | Cattle | Northern | 0 | 0 | 0 | 0 | 0 | 0 |
| 5311 | Cattle | Northern | 0 | 0 | 1 | 0 | 0 | 1 |
| 5312 | Cattle | Northern | 0 | 0 | 0 | 0 | 0 | 0 |
| 5313 | Cattle | Northern | 0 | 0 | 0 | 0 | 0 | 0 |
| 5314 | Cattle | Northern | 0 | 0 | 1 | 1 | 0 | 1 |
| 5315 | Cattle | Northern | 0 | 0 | 0 | 0 | 0 | 1 |
| 5316 | Cattle | Northern | 0 | 0 | 1 | 1 | 0 | 1 |
| 5317 | Cattle | Northern | 0 | 0 | 1 | 1 | 0 | 1 |
| 5318 | Cattle | Northern | 0 | 0 | 0 | 0 | 0 | 0 |
| 5319 | Cattle | Northern | 0 | 0 | 1 | 1 | 0 | 1 |
| 5320 | Cattle | Northern | 0 | 0 | 1 | 0 | 0 | 1 |
| 5321 | Cattle | Northern | 0 | 0 | 0 | 1 | 0 | 1 |
| 5322 | Cattle | Northern | 0 | 0 | 1 | 0 | 0 | 1 |
| 5323 | Cattle | Northern | 0 | 0 | 1 | 1 | 0 | 1 |
| 5324 | Cattle | Central  | 0 | 0 | 0 | 0 | 0 | 0 |
| 5325 | Cattle | Central  | 0 | 0 | 0 | 0 | 0 | 0 |
| 5326 | Cattle | Central  | 0 | 0 | 0 | 0 | 0 | 0 |
| 5327 | Cattle | Central  | 0 | 0 | 0 | 0 | 0 | 0 |

|      |        |              |   |   |   |   |   |   |
|------|--------|--------------|---|---|---|---|---|---|
| 5328 | Cattle | Central      | 0 | 1 | 1 | 0 | 0 | 1 |
| 5329 | Cattle | Central      | 0 | 0 | 0 | 0 | 0 | 0 |
| 5330 | Cattle | Eastern      | 0 | 0 | 1 | 1 | 0 | 1 |
| 5331 | Cattle | Eastern      | 0 | 0 | 1 | 0 | 0 | 1 |
| 5332 | Cattle | Eastern      | 0 | 0 | 0 | 0 | 0 | 0 |
| 5333 | Cattle | Eastern      | 0 | 0 | 1 | 1 | 0 | 1 |
| 5334 | Cattle | Eastern      | 0 | 0 | 0 | 0 | 0 | 0 |
| 5335 | Cattle | Eastern      | 0 | 0 | 1 | 1 | 0 | 1 |
| 5336 | Cattle | Eastern      | 0 | 0 | 0 | 1 | 0 | 1 |
| 5337 | Cattle | Eastern      | 0 | 0 | 1 | 1 | 0 | 1 |
| 5338 | Cattle | Eastern      | 0 | 0 | 1 | 1 | 0 | 1 |
| 5339 | Cattle | Eastern      | 0 | 0 | 0 | 0 | 0 | 0 |
| 5340 | Cattle | Eastern      | 0 | 0 | 1 | 1 | 0 | 1 |
| 5341 | Cattle | Eastern      | 0 | 0 | 1 | 1 | 0 | 1 |
| 5342 | Cattle | Eastern      | 0 | 0 | 0 | 0 | 0 | 0 |
| 5343 | Cattle | Eastern      | 0 | 0 | 1 | 0 | 0 | 1 |
| 5344 | Cattle | Eastern      | 0 | 0 | 1 | 1 | 0 | 1 |
| 5345 | Cattle | Eastern      | 0 | 0 | 1 | 1 | 0 | 1 |
| 5346 | Cattle | Eastern      | 0 | 0 | 1 | 0 | 0 | 1 |
| 5347 | Cattle | Eastern      | 0 | 0 | 1 | 1 | 0 | 1 |
| 5348 | Cattle | Eastern      | 0 | 0 | 1 | 1 | 0 | 1 |
| 5349 | Cattle | Eastern      | 0 | 0 | 0 | 0 | 0 | 0 |
| 5350 | Cattle | Eastern      | 0 | 0 | 0 | 0 | 0 | 0 |
| 5351 | Cattle | Eastern      | 0 | 0 | 0 | 0 | 0 | 0 |
| 5352 | Cattle | Eastern      | 0 | 0 | 1 | 1 | 0 | 1 |
| 5353 | Cattle | Eastern      | 0 | 0 | 1 | 1 | 0 | 1 |
| 5354 | Cattle | Eastern      | 0 | 0 | 0 | 0 | 0 | 0 |
| 5355 | Cattle | Eastern      | 0 | 0 | 1 | 0 | 0 | 1 |
| 5356 | Cattle | Southern     | 0 | 0 | 1 | 1 | 0 | 1 |
| 5357 | Cattle | Southern     | 0 | 0 | 1 | 1 | 1 | 1 |
| 5358 | Cattle | Southern     | 0 | 0 | 1 | 1 | 0 | 1 |
| 5359 | Cattle | Southern     | 0 | 0 | 1 | 0 | 0 | 1 |
| 5360 | Cattle | Southern     | 0 | 0 | 1 | 1 | 0 | 1 |
| 5361 | Cattle | Southern     | 0 | 0 | 1 | 0 | 0 | 1 |
| 5362 | Cattle | Southern     | 0 | 0 | 1 | 0 | 0 | 1 |
| 5363 | Cattle | Northeastern | 0 | 0 | 1 | 0 | 0 | 1 |
| 5364 | Cattle | Northeastern | 0 | 0 | 1 | 1 | 0 | 1 |
| 5365 | Cattle | Northeastern | 0 | 0 | 1 | 0 | 0 | 1 |
| 5366 | Cattle | Northeastern | 0 | 0 | 0 | 0 | 0 | 0 |
| 5367 | Cattle | Northeastern | 0 | 0 | 0 | 0 | 0 | 0 |
| 5368 | Cattle | Northeastern | 0 | 0 | 1 | 0 | 0 | 1 |
| 5369 | Cattle | Northeastern | 0 | 0 | 1 | 1 | 0 | 1 |
| 5370 | Cattle | Northeastern | 0 | 0 | 0 | 0 | 0 | 0 |
| 5371 | Cattle | Northeastern | 0 | 0 | 1 | 1 | 0 | 1 |
| 5372 | Cattle | Northeastern | 0 | 0 | 1 | 1 | 0 | 1 |
| 5373 | Cattle | Northeastern | 0 | 0 | 1 | 1 | 0 | 1 |
| 5374 | Cattle | Northeastern | 0 | 0 | 1 | 1 | 0 | 1 |
| 5375 | Cattle | Central      | 0 | 0 | 1 | 1 | 0 | 1 |



|      |        |              |   |   |   |   |   |   |
|------|--------|--------------|---|---|---|---|---|---|
| 5376 | Cattle | Central      | 0 | 0 | 1 | 0 | 0 | 1 |
| 5377 | Cattle | Central      | 0 | 0 | 1 | 0 | 0 | 1 |
| 5378 | Cattle | Central      | 0 | 0 | 0 | 0 | 0 | 0 |
| 5379 | Cattle | Central      | 0 | 0 | 0 | 0 | 0 | 0 |
| 5380 | Cattle | Central      | 0 | 0 | 1 | 0 | 0 | 1 |
| 5381 | Cattle | Central      | 0 | 0 | 0 | 0 | 0 | 0 |
| 5382 | Cattle | Central      | 0 | 0 | 0 | 0 | 0 | 0 |
| 5383 | Cattle | Central      | 0 | 0 | 0 | 0 | 0 | 0 |
| 5384 | Cattle | Central      | 0 | 0 | 0 | 0 | 0 | 0 |
| 5385 | Cattle | Central      | 0 | 0 | 0 | 0 | 0 | 0 |
| 5386 | Cattle | Central      | 0 | 0 | 0 | 0 | 0 | 0 |
| 5387 | Cattle | Central      | 0 | 0 | 0 | 0 | 0 | 0 |
| 5388 | Cattle | Central      | 0 | 0 | 0 | 0 | 0 | 0 |
| 5389 | Cattle | Central      | 0 | 0 | 0 | 0 | 0 | 0 |
| 5390 | Cattle | Central      | 0 | 0 | 1 | 0 | 0 | 1 |
| 5391 | Cattle | Central      | 0 | 0 | 0 | 0 | 0 | 0 |
| 5392 | Cattle | Central      | 0 | 0 | 0 | 0 | 0 | 0 |
| 5393 | Cattle | Central      | 0 | 0 | 0 | 0 | 0 | 0 |
| 5394 | Cattle | Central      | 0 | 0 | 0 | 0 | 0 | 0 |
| 5395 | Cattle | Central      | 0 | 0 | 0 | 0 | 0 | 0 |
| 5396 | Cattle | Central      | 0 | 0 | 0 | 0 | 0 | 0 |
| 5397 | Cattle | Central      | 0 | 0 | 0 | 0 | 0 | 0 |
| 5398 | Cattle | Northeastern | 0 | 0 | 0 | 0 | 0 | 0 |
| 5399 | Cattle | Northeastern | 0 | 0 | 1 | 0 | 0 | 1 |
| 5400 | Cattle | Northeastern | 0 | 0 | 0 | 0 | 0 | 0 |
| 5401 | Cattle | Northeastern | 0 | 0 | 0 | 0 | 0 | 0 |
| 5402 | Cattle | Northeastern | 0 | 0 | 0 | 0 | 0 | 0 |
| 5403 | Cattle | Eastern      | 0 | 1 | 1 | 1 | 0 | 1 |
| 5404 | Cattle | Eastern      | 0 | 1 | 1 | 1 | 0 | 1 |
| 5405 | Cattle | Eastern      | 0 | 0 | 0 | 0 | 0 | 0 |
| 5406 | Cattle | Eastern      | 0 | 0 | 1 | 1 | 0 | 1 |
| 5407 | Cattle | Eastern      | 0 | 0 | 1 | 1 | 0 | 1 |
| 5408 | Cattle | Eastern      | 0 | 0 | 0 | 0 | 0 | 0 |
| 5409 | Cattle | Eastern      | 0 | 1 | 0 | 0 | 0 | 1 |
| 5410 | Cattle | Eastern      | 0 | 0 | 0 | 0 | 0 | 0 |
| 5411 | Cattle | Eastern      | 0 | 0 | 1 | 1 | 0 | 1 |
| 5412 | Cattle | Eastern      | 0 | 1 | 1 | 1 | 0 | 1 |
| 5413 | Cattle | Eastern      | 0 | 0 | 0 | 1 | 0 | 1 |
| 5414 | Cattle | Eastern      | 0 | 1 | 1 | 1 | 0 | 1 |
| 5415 | Cattle | Eastern      | 0 | 0 | 1 | 1 | 1 | 1 |
| 5416 | Cattle | Eastern      | 0 | 0 | 0 | 1 | 0 | 1 |
| 5417 | Cattle | Eastern      | 0 | 0 | 1 | 1 | 0 | 1 |
| 5418 | Cattle | Eastern      | 0 | 0 | 1 | 1 | 0 | 1 |
| 5419 | Cattle | Eastern      | 0 | 0 | 0 | 0 | 0 | 0 |
| 5420 | Cattle | Eastern      | 0 | 0 | 1 | 1 | 0 | 1 |
| 5421 | Cattle | Eastern      | 0 | 1 | 0 | 1 | 0 | 1 |
| 5422 | Cattle | Eastern      | 0 | 0 | 0 | 1 | 0 | 1 |
| 5423 | Cattle | Eastern      | 0 | 1 | 0 | 1 | 0 | 1 |

|      |        |          |   |   |   |   |   |   |
|------|--------|----------|---|---|---|---|---|---|
| 5424 | Cattle | Eastern  | 0 | 0 | 1 | 1 | 0 | 1 |
| 5425 | Cattle | Eastern  | 0 | 1 | 1 | 1 | 1 | 1 |
| 5426 | Cattle | Southern | 0 | 0 | 1 | 1 | 0 | 1 |
| 5427 | Cattle | Southern | 0 | 0 | 0 | 0 | 0 | 0 |
| 5428 | Cattle | Southern | 0 | 0 | 1 | 1 | 0 | 1 |
| 5429 | Cattle | Southern | 0 | 0 | 0 | 0 | 0 | 0 |
| 5430 | Cattle | Southern | 0 | 0 | 1 | 1 | 0 | 1 |
| 5431 | Cattle | Southern | 0 | 0 | 0 | 0 | 0 | 0 |
| 5432 | Cattle | Southern | 0 | 0 | 0 | 1 | 0 | 1 |
| 5433 | Cattle | Southern | 0 | 0 | 1 | 1 | 0 | 1 |
| 5434 | Cattle | Southern | 0 | 0 | 0 | 0 | 0 | 0 |
| 5435 | Cattle | Southern | 0 | 0 | 0 | 0 | 0 | 0 |
| 5436 | Cattle | Southern | 0 | 0 | 1 | 1 | 0 | 1 |
| 5437 | Cattle | Southern | 0 | 0 | 0 | 0 | 0 | 0 |
| 5438 | Cattle | Southern | 0 | 0 | 0 | 0 | 0 | 0 |
| 5439 | Cattle | Southern | 0 | 0 | 1 | 1 | 0 | 1 |
| 5440 | Cattle | Southern | 0 | 0 | 0 | 0 | 0 | 0 |
| 5441 | Cattle | Southern | 0 | 0 | 1 | 1 | 0 | 1 |
| 5442 | Cattle | Southern | 0 | 0 | 1 | 1 | 0 | 1 |
| 5443 | Cattle | Southern | 0 | 1 | 1 | 1 | 0 | 1 |
| 5444 | Cattle | Southern | 0 | 1 | 1 | 1 | 0 | 1 |
| 5445 | Cattle | Southern | 0 | 1 | 1 | 1 | 0 | 1 |
| 5446 | Cattle | Southern | 0 | 0 | 0 | 0 | 0 | 0 |
| 5447 | Cattle | Southern | 0 | 0 | 1 | 1 | 0 | 1 |
| 5448 | Cattle | Southern | 0 | 0 | 0 | 0 | 0 | 0 |
| 5449 | Cattle | Southern | 0 | 0 | 1 | 1 | 0 | 1 |
| 5450 | Cattle | Southern | 0 | 0 | 1 | 1 | 0 | 1 |
| 5451 | Cattle | Southern | 0 | 1 | 1 | 1 | 0 | 1 |
| 5452 | Cattle | Southern | 0 | 0 | 1 | 1 | 0 | 1 |
| 5453 | Cattle | Southern | 0 | 0 | 1 | 1 | 1 | 1 |
| 5454 | Cattle | Southern | 0 | 0 | 1 | 1 | 1 | 1 |
| 5455 | Cattle | Southern | 0 | 0 | 1 | 1 | 0 | 1 |
| 5456 | Cattle | Southern | 0 | 0 | 1 | 1 | 1 | 1 |
| 5457 | Cattle | Southern | 0 | 0 | 0 | 1 | 0 | 1 |
| 5458 | Cattle | Southern | 0 | 0 | 0 | 1 | 0 | 1 |
| 5459 | Cattle | Southern | 0 | 0 | 1 | 1 | 0 | 1 |
| 5460 | Cattle | Southern | 0 | 0 | 0 | 1 | 0 | 1 |
| 5461 | Cattle | Southern | 0 | 0 | 1 | 1 | 0 | 1 |
| 5462 | Cattle | Southern | 0 | 0 | 0 | 1 | 0 | 1 |
| 5463 | Cattle | Southern | 0 | 0 | 0 | 1 | 0 | 1 |
| 5464 | Cattle | Southern | 0 | 0 | 1 | 1 | 0 | 1 |
| 5465 | Cattle | Southern | 0 | 0 | 0 | 0 | 0 | 0 |
| 5466 | Cattle | Southern | 0 | 0 | 1 | 1 | 0 | 1 |
| 5467 | Cattle | Southern | 0 | 0 | 0 | 1 | 0 | 1 |
| 5468 | Cattle | Southern | 0 | 0 | 0 | 0 | 0 | 0 |
| 5469 | Cattle | Southern | 0 | 0 | 0 | 1 | 0 | 1 |
| 5470 | Cattle | Southern | 0 | 0 | 0 | 1 | 0 | 1 |
| 5471 | Cattle | Southern | 0 | 0 | 1 | 1 | 0 | 1 |

|      |        |              |   |   |   |   |   |   |
|------|--------|--------------|---|---|---|---|---|---|
| 5472 | Cattle | Southern     | 0 | 0 | 0 | 0 | 0 | 0 |
| 5473 | Cattle | Northeastern | 0 | 0 | 0 | 0 | 0 | 0 |
| 5474 | Cattle | Northeastern | 0 | 0 | 0 | 0 | 0 | 0 |
| 5475 | Cattle | Northeastern | 0 | 0 | 0 | 0 | 0 | 0 |
| 5476 | Cattle | Northeastern | 0 | 0 | 0 | 0 | 0 | 0 |
| 5477 | Cattle | Northeastern | 0 | 0 | 0 | 0 | 0 | 0 |
| 5478 | Cattle | Northeastern | 0 | 0 | 0 | 0 | 0 | 0 |
| 5479 | Cattle | Northeastern | 0 | 0 | 0 | 0 | 0 | 0 |
| 5480 | Cattle | Northeastern | 0 | 0 | 0 | 0 | 0 | 0 |
| 5481 | Cattle | Northeastern | 0 | 0 | 0 | 0 | 0 | 0 |
| 5482 | Cattle | Northeastern | 0 | 0 | 1 | 1 | 0 | 1 |
| 5483 | Cattle | Northeastern | 0 | 0 | 1 | 1 | 0 | 1 |
| 5484 | Cattle | Northeastern | 0 | 0 | 0 | 0 | 0 | 0 |
| 5485 | Cattle | Northeastern | 0 | 0 | 0 | 0 | 0 | 0 |
| 5486 | Cattle | Northeastern | 0 | 0 | 0 | 1 | 0 | 1 |
| 5487 | Cattle | Northeastern | 0 | 0 | 0 | 1 | 0 | 1 |
| 5488 | Cattle | Northeastern | 0 | 0 | 1 | 1 | 0 | 1 |
| 5489 | Cattle | Northeastern | 0 | 0 | 1 | 1 | 0 | 1 |
| 5490 | Cattle | Northeastern | 0 | 0 | 1 | 1 | 0 | 1 |
| 5491 | Cattle | Northeastern | 0 | 0 | 0 | 0 | 0 | 0 |
| 5492 | Cattle | Northeastern | 0 | 0 | 0 | 0 | 0 | 0 |
| 5493 | Cattle | Northeastern | 0 | 0 | 0 | 0 | 0 | 0 |
| 5494 | Cattle | Northeastern | 0 | 0 | 1 | 1 | 1 | 1 |
| 5495 | Cattle | Northeastern | 0 | 0 | 0 | 1 | 0 | 1 |
| 5496 | Cattle | Northeastern | 0 | 0 | 1 | 1 | 0 | 1 |
| 5497 | Cattle | Northeastern | 0 | 0 | 1 | 1 | 0 | 1 |
| 5498 | Cattle | Northeastern | 0 | 0 | 1 | 1 | 0 | 1 |
| 5499 | Cattle | Northeastern | 0 | 0 | 0 | 0 | 0 | 0 |
| 5500 | Cattle | Northeastern | 0 | 0 | 0 | 1 | 0 | 1 |
| 5501 | Cattle | Northeastern | 0 | 0 | 1 | 1 | 0 | 1 |
| 5502 | Cattle | Northeastern | 0 | 0 | 1 | 1 | 0 | 1 |
| 5503 | Cattle | Northeastern | 0 | 0 | 0 | 0 | 0 | 0 |
| 5504 | Cattle | Northeastern | 0 | 0 | 1 | 1 | 0 | 1 |
| 5505 | Cattle | Northeastern | 0 | 0 | 1 | 1 | 0 | 1 |
| 5506 | Cattle | Northeastern | 0 | 0 | 1 | 1 | 0 | 1 |
| 5507 | Cattle | Northeastern | 0 | 0 | 1 | 1 | 0 | 1 |
| 5508 | Cattle | Northeastern | 0 | 0 | 1 | 1 | 0 | 1 |
| 5509 | Cattle | Northeastern | 0 | 0 | 1 | 1 | 0 | 1 |
| 5510 | Cattle | Northeastern | 0 | 0 | 0 | 1 | 0 | 1 |
| 5511 | Cattle | Northeastern | 0 | 0 | 0 | 0 | 0 | 0 |
| 5512 | Cattle | Northeastern | 0 | 0 | 1 | 1 | 0 | 1 |
| 5513 | Cattle | Northeastern | 0 | 0 | 1 | 1 | 0 | 1 |
| 5514 | Cattle | Northeastern | 0 | 0 | 1 | 1 | 0 | 1 |
| 5515 | Cattle | Northeastern | 0 | 0 | 1 | 1 | 0 | 1 |
| 5516 | Cattle | Northeastern | 0 | 0 | 0 | 0 | 0 | 0 |
| 5517 | Cattle | Northeastern | 0 | 0 | 0 | 0 | 0 | 0 |
| 5518 | Cattle | Northeastern | 0 | 0 | 1 | 1 | 0 | 1 |
| 5519 | Cattle | Northeastern | 0 | 0 | 1 | 1 | 0 | 1 |

|      |        |              |   |   |   |   |   |   |
|------|--------|--------------|---|---|---|---|---|---|
| 5520 | Cattle | Northeastern | 0 | 0 | 0 | 0 | 0 | 0 |
| 5521 | Cattle | Northeastern | 0 | 0 | 0 | 1 | 0 | 1 |
| 5522 | Cattle | Northeastern | 0 | 0 | 0 | 1 | 0 | 1 |
| 5523 | Cattle | Northeastern | 0 | 0 | 0 | 0 | 0 | 0 |
| 5524 | Cattle | Northeastern | 0 | 0 | 1 | 1 | 0 | 1 |
| 5525 | Cattle | Northeastern | 0 | 0 | 1 | 1 | 1 | 1 |
| 5526 | Cattle | Northeastern | 0 | 0 | 1 | 1 | 0 | 1 |
| 5527 | Cattle | Northeastern | 0 | 0 | 1 | 1 | 0 | 1 |
| 5528 | Cattle | Northeastern | 0 | 0 | 1 | 1 | 0 | 1 |
| 5529 | Cattle | Northeastern | 0 | 0 | 1 | 1 | 0 | 1 |
| 5530 | Cattle | Northeastern | 0 | 0 | 1 | 1 | 1 | 1 |
| 5531 | Cattle | Northeastern | 0 | 0 | 0 | 0 | 0 | 0 |
| 5532 | Cattle | Northeastern | 0 | 0 | 0 | 0 | 0 | 0 |
| 5533 | Cattle | Northeastern | 0 | 0 | 1 | 1 | 0 | 1 |
| 5534 | Cattle | Northeastern | 0 | 0 | 1 | 1 | 0 | 1 |
| 5535 | Cattle | Northeastern | 0 | 0 | 0 | 0 | 0 | 0 |
| 5536 | Cattle | Northeastern | 0 | 0 | 0 | 1 | 0 | 1 |
| 5537 | Cattle | Northeastern | 0 | 0 | 0 | 0 | 0 | 0 |
| 5538 | Cattle | Northeastern | 0 | 0 | 1 | 1 | 0 | 1 |
| 5539 | Cattle | Northeastern | 0 | 0 | 1 | 1 | 0 | 1 |
| 5540 | Cattle | Northeastern | 0 | 0 | 0 | 1 | 0 | 1 |
| 5541 | Cattle | Northeastern | 0 | 0 | 0 | 0 | 0 | 0 |
| 5542 | Cattle | Northeastern | 0 | 0 | 0 | 0 | 0 | 0 |
| 5543 | Cattle | Northeastern | 0 | 0 | 1 | 1 | 0 | 1 |
| 5544 | Cattle | Northeastern | 0 | 1 | 1 | 1 | 0 | 1 |
| 5545 | Cattle | Northeastern | 0 | 0 | 0 | 1 | 0 | 1 |
| 5546 | Cattle | Northeastern | 0 | 0 | 0 | 0 | 1 | 1 |
| 5547 | Cattle | Northeastern | 0 | 0 | 0 | 0 | 0 | 0 |
| 5548 | Cattle | Northeastern | 0 | 0 | 0 | 0 | 0 | 0 |
| 5549 | Cattle | Northeastern | 0 | 0 | 0 | 0 | 0 | 0 |
| 5550 | Cattle | Northeastern | 0 | 0 | 0 | 0 | 0 | 0 |
| 5551 | Cattle | Northeastern | 0 | 0 | 0 | 0 | 0 | 1 |
| 5552 | Cattle | Northeastern | 0 | 0 | 0 | 0 | 0 | 0 |
| 5553 | Cattle | Northeastern | 0 | 0 | 1 | 1 | 0 | 1 |
| 5554 | Cattle | Northeastern | 0 | 0 | 1 | 1 | 0 | 1 |
| 5555 | Cattle | Northeastern | 0 | 0 | 0 | 0 | 0 | 0 |
| 5556 | Cattle | Northeastern | 0 | 0 | 0 | 0 | 0 | 0 |
| 5557 | Cattle | Northeastern | 0 | 0 | 1 | 1 | 0 | 1 |
| 5558 | Cattle | Northeastern | 0 | 0 | 0 | 0 | 0 | 0 |
| 5559 | Cattle | Northeastern | 0 | 0 | 0 | 0 | 0 | 0 |
| 5560 | Cattle | Northeastern | 0 | 0 | 0 | 0 | 0 | 0 |
| 5561 | Cattle | Northeastern | 0 | 0 | 1 | 1 | 0 | 1 |
| 5562 | Cattle | Northeastern | 0 | 0 | 0 | 0 | 0 | 0 |
| 5563 | Cattle | Northeastern | 0 | 0 | 0 | 0 | 0 | 0 |
| 5564 | Cattle | Northeastern | 0 | 0 | 0 | 0 | 0 | 0 |
| 5565 | Cattle | Northeastern | 0 | 0 | 1 | 1 | 0 | 1 |
| 5566 | Cattle | Northeastern | 0 | 0 | 0 | 0 | 0 | 0 |
| 5567 | Cattle | Northeastern | 0 | 0 | 0 | 0 | 0 | 0 |

|      |        |              |   |   |   |   |   |   |
|------|--------|--------------|---|---|---|---|---|---|
| 5568 | Cattle | Northeastern | 0 | 0 | 0 | 0 | 0 | 0 |
| 5569 | Cattle | Northeastern | 0 | 0 | 1 | 1 | 0 | 1 |
| 5570 | Cattle | Northeastern | 0 | 0 | 1 | 1 | 0 | 1 |
| 5571 | Cattle | Northeastern | 0 | 0 | 0 | 0 | 0 | 0 |
| 5572 | Cattle | Northeastern | 0 | 0 | 0 | 0 | 0 | 0 |
| 5573 | Cattle | Northeastern | 0 | 0 | 1 | 1 | 0 | 1 |
| 5574 | Cattle | Northeastern | 0 | 0 | 1 | 1 | 0 | 1 |
| 5575 | Cattle | Northeastern | 0 | 0 | 0 | 0 | 0 | 0 |
| 5576 | Cattle | Northeastern | 0 | 0 | 0 | 0 | 0 | 0 |
| 5577 | Cattle | Northeastern | 0 | 0 | 1 | 1 | 0 | 1 |
| 5578 | Cattle | Northeastern | 0 | 0 | 0 | 0 | 0 | 0 |
| 5579 | Cattle | Northeastern | 0 | 0 | 0 | 0 | 0 | 0 |
| 5580 | Cattle | Northeastern | 0 | 0 | 0 | 0 | 0 | 0 |
| 5581 | Cattle | Northeastern | 0 | 0 | 0 | 0 | 0 | 0 |
| 5582 | Cattle | Northeastern | 0 | 0 | 0 | 0 | 0 | 0 |
| 5583 | Cattle | Northeastern | 0 | 0 | 0 | 0 | 0 | 0 |
| 5584 | Cattle | Northeastern | 0 | 0 | 0 | 0 | 0 | 0 |
| 5585 | Cattle | Northeastern | 0 | 0 | 0 | 0 | 0 | 0 |
| 5586 | Cattle | Northeastern | 0 | 0 | 0 | 0 | 0 | 0 |
| 5587 | Cattle | Northeastern | 0 | 0 | 1 | 1 | 0 | 1 |
| 5588 | Cattle | Northeastern | 0 | 0 | 0 | 0 | 0 | 0 |
| 5589 | Cattle | Northeastern | 0 | 0 | 1 | 1 | 0 | 1 |
| 5590 | Cattle | Northeastern | 0 | 0 | 1 | 1 | 0 | 1 |
| 5591 | Cattle | Central      | 0 | 0 | 0 | 0 | 0 | 0 |
| 5592 | Cattle | Central      | 0 | 0 | 0 | 0 | 0 | 0 |
| 5593 | Cattle | Central      | 0 | 0 | 0 | 0 | 0 | 0 |
| 5594 | Cattle | Central      | 0 | 1 | 1 | 0 | 0 | 1 |
| 5595 | Cattle | Central      | 0 | 0 | 0 | 0 | 0 | 0 |
| 5596 | Cattle | Eastern      | 0 | 0 | 0 | 0 | 0 | 0 |
| 5597 | Cattle | Eastern      | 0 | 0 | 0 | 0 | 0 | 0 |
| 5598 | Cattle | Eastern      | 0 | 0 | 0 | 0 | 0 | 0 |
| 5599 | Cattle | Eastern      | 0 | 0 | 1 | 1 | 1 | 1 |
| 5600 | Cattle | Eastern      | 0 | 0 | 1 | 1 | 0 | 1 |
| 5601 | Cattle | Eastern      | 0 | 1 | 1 | 1 | 0 | 1 |
| 5602 | Cattle | Eastern      | 0 | 0 | 1 | 1 | 1 | 1 |
| 5603 | Cattle | Eastern      | 0 | 0 | 0 | 0 | 0 | 0 |
| 5604 | Cattle | Eastern      | 0 | 0 | 1 | 1 | 0 | 1 |
| 5605 | Cattle | Eastern      | 0 | 0 | 0 | 0 | 0 | 0 |
| 5606 | Cattle | Eastern      | 0 | 0 | 1 | 1 | 0 | 1 |
| 5607 | Cattle | Eastern      | 0 | 1 | 1 | 1 | 0 | 1 |
| 5608 | Cattle | Eastern      | 0 | 0 | 1 | 1 | 0 | 1 |
| 5609 | Cattle | Eastern      | 0 | 0 | 1 | 1 | 0 | 1 |
| 5610 | Cattle | Eastern      | 0 | 0 | 1 | 1 | 1 | 1 |
| 5611 | Cattle | Central      | 0 | 0 | 1 | 1 | 0 | 1 |
| 5612 | Cattle | Central      | 0 | 0 | 1 | 1 | 0 | 1 |
| 5613 | Cattle | Central      | 0 | 0 | 1 | 1 | 0 | 1 |
| 5614 | Cattle | Central      | 0 | 0 | 1 | 1 | 0 | 1 |
| 5615 | Cattle | Central      | 0 | 0 | 1 | 1 | 0 | 1 |

|      |        |          |   |   |   |   |   |   |
|------|--------|----------|---|---|---|---|---|---|
| 5616 | Cattle | Eastern  | 0 | 0 | 1 | 1 | 0 | 1 |
| 5617 | Cattle | Eastern  | 0 | 0 | 0 | 0 | 0 | 0 |
| 5618 | Cattle | Central  | 0 | 0 | 1 | 1 | 0 | 1 |
| 5619 | Cattle | Central  | 0 | 0 | 0 | 0 | 0 | 0 |
| 5620 | Cattle | Central  | 0 | 0 | 1 | 1 | 0 | 1 |
| 5621 | Cattle | Central  | 0 | 0 | 1 | 1 | 0 | 1 |
| 5622 | Cattle | Southern | 0 | 0 | 1 | 1 | 0 | 1 |
| 5623 | Cattle | Southern | 0 | 0 | 0 | 0 | 0 | 0 |
| 5624 | Cattle | Southern | 0 | 0 | 1 | 1 | 0 | 1 |
| 5625 | Cattle | Southern | 0 | 0 | 1 | 1 | 0 | 1 |
| 5626 | Cattle | Southern | 0 | 0 | 1 | 1 | 0 | 1 |
| 5627 | Cattle | Southern | 0 | 0 | 1 | 1 | 0 | 1 |
| 5628 | Cattle | Southern | 0 | 0 | 1 | 1 | 0 | 1 |
| 5629 | Cattle | Southern | 0 | 0 | 1 | 1 | 0 | 1 |
| 5630 | Cattle | Central  | 0 | 0 | 1 | 1 | 0 | 1 |
| 5631 | Cattle | Central  | 0 | 0 | 0 | 0 | 0 | 0 |
| 5632 | Cattle | Central  | 0 | 0 | 1 | 0 | 0 | 1 |
| 5633 | Cattle | Central  | 0 | 0 | 1 | 0 | 0 | 1 |
| 5634 | Cattle | Southern | 0 | 0 | 1 | 1 | 0 | 1 |
| 5635 | Cattle | Southern | 0 | 0 | 1 | 1 | 0 | 1 |
| 5636 | Cattle | Southern | 0 | 0 | 0 | 0 | 0 | 0 |
| 5637 | Cattle | Southern | 0 | 0 | 0 | 0 | 0 | 0 |
| 5638 | Cattle | Southern | 0 | 0 | 0 | 1 | 0 | 1 |
| 5639 | Pig    | Northern | 0 | 0 | 0 | 0 | 0 | 0 |
| 5640 | Pig    | Northern | 0 | 0 | 0 | 0 | 0 | 0 |
| 5641 | Pig    | Northern | 0 | 0 | 0 | 0 | 0 | 0 |
| 5642 | Pig    | Northern | 0 | 0 | 0 | 0 | 0 | 0 |
| 5643 | Pig    | Central  | 0 | 0 | 0 | 0 | 0 | 0 |
| 5644 | Pig    | Central  | 0 | 0 | 0 | 0 | 0 | 0 |
| 5645 | Pig    | Central  | 0 | 0 | 0 | 0 | 0 | 0 |
| 5646 | Pig    | Central  | 0 | 0 | 0 | 0 | 0 | 0 |
| 5647 | Pig    | Central  | 0 | 0 | 0 | 0 | 0 | 0 |
| 5648 | Pig    | Central  | 0 | 0 | 0 | 0 | 0 | 0 |
| 5649 | Pig    | Central  | 0 | 0 | 0 | 0 | 0 | 0 |
| 5650 | Pig    | Central  | 0 | 0 | 0 | 0 | 0 | 0 |
| 5651 | Pig    | Central  | 0 | 0 | 0 | 0 | 0 | 0 |
| 5652 | Pig    | Central  | 0 | 0 | 0 | 0 | 0 | 0 |
| 5653 | Pig    | Central  | 0 | 0 | 0 | 0 | 0 | 0 |
| 5654 | Pig    | Central  | 0 | 0 | 0 | 0 | 0 | 0 |
| 5655 | Pig    | Central  | 0 | 0 | 0 | 0 | 0 | 0 |
| 5656 | Pig    | Central  | 0 | 0 | 0 | 0 | 0 | 0 |
| 5657 | Pig    | Central  | 0 | 0 | 0 | 0 | 0 | 0 |
| 5658 | Pig    | Central  | 0 | 0 | 0 | 0 | 0 | 0 |
| 5659 | Pig    | Central  | 0 | 0 | 0 | 0 | 0 | 0 |
| 5660 | Pig    | Central  | 0 | 0 | 0 | 0 | 0 | 0 |
| 5661 | Pig    | Central  | 0 | 0 | 0 | 0 | 0 | 0 |
| 5662 | Pig    | Central  | 0 | 0 | 0 | 0 | 0 | 0 |
| 5663 | Pig    | Central  | 0 | 0 | 0 | 0 | 0 | 0 |

|      |     |          |   |   |   |   |   |   |
|------|-----|----------|---|---|---|---|---|---|
| 5664 | Pig | Central  | 0 | 0 | 0 | 0 | 0 | 0 |
| 5665 | Pig | Central  | 0 | 0 | 0 | 0 | 0 | 0 |
| 5666 | Pig | Central  | 0 | 0 | 0 | 0 | 0 | 0 |
| 5667 | Pig | Central  | 0 | 0 | 0 | 0 | 0 | 0 |
| 5668 | Pig | Central  | 0 | 0 | 0 | 0 | 0 | 0 |
| 5669 | Pig | Central  | 0 | 0 | 0 | 0 | 0 | 0 |
| 5670 | Pig | Central  | 0 | 0 | 0 | 0 | 0 | 0 |
| 5671 | Pig | Central  | 0 | 0 | 0 | 0 | 0 | 0 |
| 5672 | Pig | Central  | 0 | 0 | 0 | 0 | 0 | 0 |
| 5673 | Pig | Northern | 0 | 0 | 0 | 0 | 0 | 0 |
| 5674 | Pig | Northern | 0 | 0 | 0 | 0 | 0 | 0 |
| 5675 | Pig | Northern | 0 | 0 | 0 | 0 | 0 | 0 |
| 5676 | Pig | Northern | 0 | 0 | 0 | 0 | 0 | 0 |
| 5677 | Pig | Southern | 0 | 0 | 0 | 0 | 0 | 0 |
| 5678 | Pig | Southern | 0 | 0 | 0 | 0 | 0 | 0 |
| 5679 | Pig | Southern | 0 | 0 | 0 | 0 | 0 | 0 |
| 5680 | Pig | Southern | 0 | 0 | 1 | 0 | 0 | 1 |
| 5681 | Pig | Central  | 0 | 0 | 0 | 0 | 0 | 0 |
| 5682 | Pig | Central  | 0 | 0 | 0 | 0 | 0 | 0 |
| 5683 | Pig | Central  | 0 | 0 | 0 | 0 | 0 | 0 |
| 5684 | Pig | Central  | 0 | 0 | 0 | 0 | 0 | 0 |
| 5685 | Pig | Central  | 0 | 0 | 0 | 0 | 0 | 0 |
| 5686 | Pig | Central  | 0 | 0 | 0 | 0 | 0 | 0 |
| 5687 | Pig | Central  | 0 | 0 | 0 | 0 | 0 | 0 |
| 5688 | Pig | Central  | 0 | 0 | 0 | 0 | 0 | 0 |
| 5689 | Pig | Central  | 0 | 0 | 0 | 0 | 0 | 0 |
| 5690 | Pig | Central  | 0 | 0 | 0 | 0 | 0 | 0 |
| 5691 | Pig | Central  | 0 | 0 | 0 | 0 | 0 | 0 |
| 5692 | Pig | Central  | 0 | 0 | 0 | 0 | 0 | 0 |
| 5693 | Pig | Central  | 0 | 0 | 0 | 0 | 0 | 0 |
| 5694 | Pig | Central  | 0 | 0 | 0 | 0 | 0 | 0 |
| 5695 | Pig | Central  | 0 | 0 | 0 | 0 | 0 | 0 |
| 5696 | Pig | Central  | 0 | 0 | 0 | 0 | 0 | 0 |
| 5697 | Pig | Southern | 0 | 0 | 0 | 0 | 0 | 0 |
| 5698 | Pig | Southern | 0 | 0 | 0 | 0 | 0 | 0 |
| 5699 | Pig | Southern | 0 | 0 | 0 | 1 | 0 | 1 |
| 5700 | Pig | Southern | 0 | 0 | 0 | 0 | 0 | 0 |
| 5701 | Pig | Central  | 0 | 0 | 0 | 0 | 0 | 0 |
| 5702 | Pig | Central  | 0 | 0 | 0 | 0 | 0 | 0 |
| 5703 | Pig | Central  | 0 | 0 | 0 | 0 | 0 | 0 |
| 5704 | Pig | Central  | 0 | 0 | 0 | 0 | 0 | 0 |
| 5705 | Pig | Central  | 0 | 0 | 0 | 0 | 0 | 0 |
| 5706 | Pig | Central  | 0 | 0 | 0 | 0 | 0 | 0 |
| 5707 | Pig | Central  | 0 | 0 | 0 | 0 | 0 | 0 |
| 5708 | Pig | Central  | 0 | 0 | 0 | 0 | 0 | 0 |
| 5709 | Pig | Central  | 0 | 0 | 0 | 0 | 0 | 0 |
| 5710 | Pig | Central  | 0 | 0 | 0 | 0 | 0 | 0 |
| 5711 | Pig | Central  | 0 | 0 | 0 | 0 | 0 | 0 |

|      |     |         |   |   |   |   |   |   |
|------|-----|---------|---|---|---|---|---|---|
| 5712 | Pig | Central | 0 | 0 | 0 | 0 | 0 | 0 |
| 5713 | Pig | Central | 0 | 0 | 0 | 0 | 0 | 0 |
| 5714 | Pig | Central | 0 | 0 | 0 | 0 | 0 | 0 |
| 5715 | Pig | Central | 0 | 0 | 0 | 0 | 0 | 0 |
| 5716 | Pig | Central | 0 | 0 | 0 | 0 | 0 | 0 |
| 5717 | Pig | Central | 0 | 0 | 0 | 0 | 0 | 0 |
| 5718 | Pig | Central | 0 | 0 | 0 | 0 | 0 | 0 |
| 5719 | Pig | Central | 0 | 0 | 0 | 0 | 0 | 0 |
| 5720 | Pig | Central | 0 | 0 | 0 | 0 | 0 | 0 |
| 5721 | Pig | Central | 0 | 0 | 0 | 0 | 0 | 0 |
| 5722 | Pig | Central | 0 | 0 | 0 | 0 | 0 | 0 |
| 5723 | Pig | Central | 0 | 0 | 0 | 0 | 0 | 0 |
| 5724 | Pig | Central | 0 | 0 | 0 | 0 | 0 | 0 |
| 5725 | Pig | Central | 0 | 0 | 0 | 0 | 0 | 0 |
| 5726 | Pig | Central | 0 | 0 | 0 | 0 | 0 | 0 |
| 5727 | Pig | Central | 0 | 0 | 0 | 0 | 0 | 0 |
| 5728 | Pig | Central | 0 | 0 | 0 | 0 | 0 | 0 |
| 5729 | Pig | Central | 0 | 0 | 0 | 0 | 0 | 0 |
| 5730 | Pig | Central | 0 | 0 | 0 | 0 | 0 | 0 |
| 5731 | Pig | Central | 0 | 0 | 0 | 0 | 0 | 0 |
| 5732 | Pig | Central | 0 | 0 | 0 | 0 | 0 | 0 |
| 5733 | Pig | Central | 0 | 0 | 0 | 0 | 0 | 0 |
| 5734 | Pig | Central | 0 | 0 | 0 | 0 | 0 | 0 |
| 5735 | Pig | Central | 0 | 0 | 0 | 0 | 0 | 0 |
| 5736 | Pig | Central | 0 | 0 | 0 | 0 | 0 | 0 |
| 5737 | Pig | Central | 0 | 0 | 0 | 0 | 0 | 0 |
| 5738 | Pig | Central | 0 | 0 | 0 | 0 | 0 | 0 |
| 5739 | Pig | Central | 0 | 0 | 0 | 0 | 0 | 0 |
| 5740 | Pig | Central | 0 | 0 | 0 | 0 | 0 | 0 |
| 5741 | Pig | Central | 0 | 0 | 0 | 0 | 0 | 0 |
| 5742 | Pig | Central | 0 | 0 | 0 | 0 | 0 | 0 |
| 5743 | Pig | Central | 0 | 0 | 0 | 0 | 0 | 0 |
| 5744 | Pig | Central | 0 | 0 | 0 | 0 | 0 | 0 |
| 5745 | Pig | Central | 0 | 0 | 0 | 0 | 0 | 0 |
| 5746 | Pig | Central | 0 | 0 | 0 | 0 | 0 | 0 |
| 5747 | Pig | Central | 0 | 0 | 0 | 0 | 0 | 0 |
| 5748 | Pig | Central | 0 | 0 | 0 | 0 | 0 | 0 |
| 5749 | Pig | Central | 0 | 0 | 0 | 0 | 0 | 0 |
| 5750 | Pig | Central | 0 | 0 | 0 | 0 | 0 | 0 |
| 5751 | Pig | Central | 0 | 0 | 0 | 0 | 0 | 0 |
| 5752 | Pig | Central | 0 | 0 | 0 | 0 | 0 | 0 |
| 5753 | Pig | Central | 0 | 0 | 0 | 1 | 0 | 1 |
| 5754 | Pig | Central | 0 | 0 | 0 | 0 | 0 | 0 |
| 5755 | Pig | Central | 0 | 0 | 0 | 0 | 0 | 0 |
| 5756 | Pig | Central | 0 | 0 | 0 | 0 | 0 | 0 |
| 5757 | Pig | Central | 0 | 0 | 0 | 0 | 0 | 0 |
| 5758 | Pig | Central | 0 | 0 | 0 | 0 | 0 | 0 |
| 5759 | Pig | Central | 0 | 0 | 0 | 0 | 0 | 0 |



|      |     |         |   |   |   |   |   |   |
|------|-----|---------|---|---|---|---|---|---|
| 5760 | Pig | Central | 0 | 0 | 0 | 0 | 0 | 0 |
| 5761 | Pig | Central | 0 | 0 | 0 | 0 | 0 | 0 |
| 5762 | Pig | Central | 0 | 0 | 0 | 0 | 0 | 0 |
| 5763 | Pig | Central | 0 | 0 | 1 | 0 | 0 | 1 |
| 5764 | Pig | Central | 0 | 0 | 0 | 0 | 0 | 0 |
| 5765 | Pig | Central | 0 | 0 | 0 | 0 | 0 | 0 |
| 5766 | Pig | Central | 0 | 0 | 0 | 0 | 0 | 0 |
| 5767 | Pig | Central | 0 | 0 | 0 | 0 | 0 | 0 |
| 5768 | Pig | Central | 0 | 0 | 0 | 0 | 0 | 0 |
| 5769 | Pig | Central | 0 | 0 | 0 | 0 | 0 | 0 |
| 5770 | Pig | Central | 0 | 0 | 1 | 0 | 0 | 1 |
| 5771 | Pig | Central | 0 | 0 | 0 | 0 | 0 | 0 |
| 5772 | Pig | Central | 0 | 0 | 1 | 0 | 0 | 1 |
| 5773 | Pig | Central | 0 | 0 | 0 | 0 | 0 | 0 |
| 5774 | Pig | Central | 0 | 0 | 0 | 0 | 0 | 0 |
| 5775 | Pig | Central | 0 | 0 | 0 | 0 | 0 | 0 |
| 5776 | Pig | Central | 0 | 0 | 0 | 0 | 0 | 0 |
| 5777 | Pig | Central | 0 | 0 | 0 | 0 | 0 | 0 |
| 5778 | Pig | Central | 0 | 0 | 0 | 0 | 0 | 0 |
| 5779 | Pig | Central | 0 | 0 | 0 | 0 | 0 | 0 |
| 5780 | Pig | Central | 0 | 0 | 0 | 0 | 0 | 0 |
| 5781 | Pig | Central | 0 | 0 | 0 | 0 | 0 | 0 |
| 5782 | Pig | Central | 0 | 0 | 0 | 0 | 0 | 0 |
| 5783 | Pig | Central | 0 | 0 | 0 | 0 | 0 | 0 |
| 5784 | Pig | Central | 0 | 0 | 0 | 0 | 0 | 0 |
| 5785 | Pig | Central | 0 | 0 | 0 | 0 | 0 | 0 |
| 5786 | Pig | Central | 0 | 0 | 0 | 0 | 0 | 0 |
| 5787 | Pig | Central | 0 | 0 | 0 | 0 | 0 | 0 |
| 5788 | Pig | Central | 0 | 0 | 0 | 0 | 0 | 0 |
| 5789 | Pig | Central | 0 | 0 | 0 | 0 | 0 | 0 |
| 5790 | Pig | Central | 0 | 0 | 0 | 0 | 0 | 0 |
| 5791 | Pig | Central | 0 | 0 | 0 | 0 | 0 | 0 |
| 5792 | Pig | Central | 0 | 0 | 0 | 0 | 0 | 0 |
| 5793 | Pig | Central | 0 | 0 | 0 | 0 | 0 | 0 |
| 5794 | Pig | Central | 0 | 0 | 0 | 0 | 0 | 0 |
| 5795 | Pig | Central | 0 | 0 | 0 | 0 | 0 | 0 |
| 5796 | Pig | Central | 0 | 0 | 0 | 0 | 0 | 0 |
| 5797 | Pig | Central | 0 | 0 | 0 | 0 | 0 | 0 |
| 5798 | Pig | Central | 0 | 0 | 0 | 0 | 0 | 0 |
| 5799 | Pig | Central | 0 | 0 | 0 | 0 | 0 | 0 |
| 5800 | Pig | Central | 0 | 0 | 0 | 0 | 0 | 0 |
| 5801 | Pig | Central | 0 | 0 | 0 | 0 | 0 | 0 |
| 5802 | Pig | Central | 0 | 0 | 0 | 0 | 0 | 0 |
| 5803 | Pig | Central | 0 | 0 | 0 | 0 | 0 | 0 |
| 5804 | Pig | Central | 0 | 0 | 0 | 0 | 0 | 0 |
| 5805 | Pig | Central | 0 | 0 | 0 | 0 | 0 | 0 |
| 5806 | Pig | Central | 0 | 0 | 0 | 0 | 0 | 0 |
| 5807 | Pig | Central | 0 | 0 | 0 | 0 | 0 | 0 |

|      |     |         |   |   |   |   |   |   |
|------|-----|---------|---|---|---|---|---|---|
| 5808 | Pig | Central | 0 | 0 | 0 | 0 | 0 | 0 |
| 5809 | Pig | Central | 0 | 0 | 0 | 0 | 0 | 0 |
| 5810 | Pig | Central | 0 | 0 | 0 | 0 | 0 | 0 |
| 5811 | Pig | Central | 0 | 0 | 0 | 0 | 0 | 0 |
| 5812 | Pig | Central | 0 | 0 | 0 | 0 | 0 | 0 |
| 5813 | Pig | Central | 0 | 0 | 0 | 0 | 0 | 0 |
| 5814 | Pig | Central | 0 | 0 | 0 | 0 | 0 | 0 |
| 5815 | Pig | Central | 0 | 0 | 0 | 0 | 0 | 0 |
| 5816 | Pig | Central | 0 | 0 | 0 | 0 | 0 | 0 |
| 5817 | Pig | Central | 0 | 0 | 0 | 0 | 0 | 0 |
| 5818 | Pig | Central | 0 | 0 | 0 | 0 | 0 | 0 |
| 5819 | Pig | Central | 0 | 0 | 0 | 0 | 0 | 0 |
| 5820 | Pig | Central | 0 | 0 | 0 | 0 | 0 | 0 |
| 5821 | Pig | Central | 0 | 0 | 0 | 0 | 0 | 0 |
| 5822 | Pig | Central | 0 | 0 | 0 | 0 | 0 | 0 |
| 5823 | Pig | Central | 0 | 0 | 0 | 0 | 0 | 0 |
| 5824 | Pig | Central | 0 | 0 | 0 | 0 | 0 | 0 |
| 5825 | Pig | Central | 0 | 0 | 0 | 0 | 0 | 0 |
| 5826 | Pig | Central | 0 | 0 | 0 | 0 | 0 | 0 |
| 5827 | Pig | Central | 0 | 0 | 0 | 0 | 0 | 0 |
| 5828 | Pig | Central | 0 | 0 | 0 | 0 | 0 | 0 |
| 5829 | Pig | Central | 0 | 0 | 0 | 0 | 0 | 0 |
| 5830 | Pig | Central | 0 | 0 | 0 | 0 | 0 | 0 |
| 5831 | Pig | Central | 0 | 0 | 0 | 0 | 0 | 0 |
| 5832 | Pig | Central | 0 | 0 | 1 | 0 | 0 | 1 |
| 5833 | Pig | Central | 0 | 0 | 0 | 0 | 0 | 0 |
| 5834 | Pig | Central | 0 | 0 | 1 | 0 | 0 | 1 |
| 5835 | Pig | Central | 0 | 0 | 0 | 0 | 0 | 0 |
| 5836 | Pig | Central | 0 | 0 | 0 | 0 | 0 | 0 |
| 5837 | Pig | Central | 0 | 0 | 1 | 0 | 0 | 1 |
| 5838 | Pig | Central | 0 | 0 | 0 | 0 | 0 | 0 |
| 5839 | Pig | Central | 0 | 0 | 1 | 0 | 0 | 1 |
| 5840 | Pig | Central | 0 | 0 | 0 | 0 | 0 | 0 |
| 5841 | Pig | Central | 0 | 0 | 0 | 0 | 0 | 0 |
| 5842 | Pig | Central | 0 | 0 | 0 | 0 | 0 | 0 |
| 5843 | Pig | Central | 0 | 0 | 0 | 0 | 0 | 0 |
| 5844 | Pig | Central | 0 | 0 | 0 | 0 | 0 | 0 |
| 5845 | Pig | Central | 0 | 0 | 0 | 0 | 0 | 0 |
| 5846 | Pig | Central | 0 | 0 | 0 | 0 | 0 | 0 |
| 5847 | Pig | Central | 0 | 0 | 0 | 0 | 0 | 0 |
| 5848 | Pig | Central | 0 | 0 | 0 | 0 | 0 | 0 |
| 5849 | Pig | Central | 0 | 0 | 0 | 0 | 0 | 0 |
| 5850 | Pig | Central | 0 | 0 | 0 | 0 | 0 | 0 |
| 5851 | Pig | Central | 0 | 0 | 0 | 0 | 0 | 0 |
| 5852 | Pig | Central | 0 | 0 | 0 | 0 | 0 | 0 |
| 5853 | Pig | Central | 0 | 0 | 0 | 0 | 0 | 0 |
| 5854 | Pig | Central | 0 | 0 | 0 | 0 | 0 | 0 |
| 5855 | Pig | Central | 0 | 0 | 0 | 0 | 0 | 0 |

|      |     |         |   |   |   |   |   |   |
|------|-----|---------|---|---|---|---|---|---|
| 5856 | Pig | Central | 0 | 0 | 0 | 0 | 0 | 0 |
| 5857 | Pig | Central | 0 | 0 | 0 | 0 | 0 | 0 |
| 5858 | Pig | Central | 0 | 0 | 0 | 0 | 0 | 0 |
| 5859 | Pig | Central | 0 | 0 | 0 | 0 | 0 | 0 |
| 5860 | Pig | Central | 0 | 0 | 1 | 0 | 0 | 1 |
| 5861 | Pig | Central | 0 | 0 | 0 | 0 | 0 | 0 |
| 5862 | Pig | Central | 0 | 0 | 0 | 0 | 0 | 0 |
| 5863 | Pig | Central | 0 | 0 | 0 | 0 | 0 | 0 |
| 5864 | Pig | Central | 0 | 0 | 1 | 0 | 0 | 1 |
| 5865 | Pig | Central | 0 | 0 | 0 | 0 | 0 | 0 |
| 5866 | Pig | Central | 0 | 0 | 0 | 0 | 0 | 0 |
| 5867 | Pig | Central | 0 | 0 | 1 | 0 | 0 | 1 |
| 5868 | Pig | Central | 0 | 0 | 0 | 0 | 0 | 0 |
| 5869 | Pig | Central | 0 | 0 | 0 | 0 | 0 | 0 |
| 5870 | Pig | Central | 0 | 0 | 0 | 0 | 0 | 0 |
| 5871 | Pig | Central | 0 | 0 | 0 | 0 | 0 | 0 |
| 5872 | Pig | Central | 0 | 0 | 0 | 0 | 0 | 0 |
| 5873 | Pig | Central | 0 | 0 | 0 | 0 | 0 | 0 |
| 5874 | Pig | Central | 0 | 0 | 1 | 0 | 0 | 1 |
| 5875 | Pig | Central | 0 | 0 | 0 | 0 | 0 | 0 |
| 5876 | Pig | Central | 0 | 0 | 1 | 0 | 0 | 1 |
| 5877 | Pig | Central | 0 | 0 | 1 | 0 | 0 | 1 |
| 5878 | Pig | Central | 0 | 0 | 0 | 0 | 0 | 0 |
| 5879 | Pig | Central | 0 | 0 | 0 | 0 | 0 | 0 |
| 5880 | Pig | Central | 0 | 0 | 0 | 0 | 0 | 0 |
| 5881 | Pig | Central | 0 | 0 | 1 | 0 | 0 | 1 |
| 5882 | Pig | Central | 0 | 0 | 0 | 0 | 0 | 0 |
| 5883 | Pig | Central | 0 | 0 | 0 | 0 | 0 | 0 |
| 5884 | Pig | Central | 0 | 0 | 0 | 0 | 0 | 0 |
| 5885 | Pig | Central | 0 | 0 | 0 | 0 | 0 | 0 |
| 5886 | Pig | Central | 0 | 0 | 0 | 0 | 0 | 0 |
| 5887 | Pig | Central | 0 | 0 | 0 | 0 | 0 | 0 |
| 5888 | Pig | Central | 0 | 0 | 0 | 0 | 0 | 0 |
| 5889 | Pig | Central | 0 | 0 | 0 | 0 | 0 | 0 |
| 5890 | Pig | Central | 0 | 0 | 0 | 0 | 0 | 0 |
| 5891 | Pig | Central | 0 | 0 | 0 | 0 | 0 | 0 |
| 5892 | Pig | Central | 0 | 0 | 0 | 0 | 0 | 0 |
| 5893 | Pig | Central | 0 | 0 | 0 | 0 | 0 | 0 |
| 5894 | Pig | Central | 0 | 0 | 0 | 0 | 0 | 0 |
| 5895 | Pig | Central | 0 | 0 | 0 | 0 | 0 | 0 |
| 5896 | Pig | Central | 0 | 0 | 0 | 0 | 0 | 0 |
| 5897 | Pig | Central | 0 | 0 | 0 | 0 | 0 | 0 |
| 5898 | Pig | Central | 0 | 0 | 0 | 0 | 0 | 0 |
| 5899 | Pig | Central | 0 | 0 | 0 | 0 | 0 | 0 |
| 5900 | Pig | Central | 0 | 0 | 0 | 0 | 0 | 0 |
| 5901 | Pig | Central | 0 | 0 | 0 | 0 | 0 | 0 |
| 5902 | Pig | Central | 0 | 0 | 0 | 0 | 0 | 0 |
| 5903 | Pig | Central | 0 | 0 | 0 | 0 | 0 | 0 |

|      |     |         |   |   |   |   |   |   |
|------|-----|---------|---|---|---|---|---|---|
| 5904 | Pig | Central | 0 | 0 | 0 | 0 | 0 | 0 |
| 5905 | Pig | Central | 0 | 0 | 0 | 0 | 0 | 0 |
| 5906 | Pig | Central | 0 | 0 | 0 | 0 | 0 | 0 |
| 5907 | Pig | Central | 0 | 0 | 0 | 0 | 0 | 0 |
| 5908 | Pig | Central | 0 | 0 | 0 | 0 | 0 | 0 |
| 5909 | Pig | Central | 0 | 0 | 0 | 0 | 0 | 0 |
| 5910 | Pig | Central | 0 | 0 | 0 | 0 | 0 | 0 |
| 5911 | Pig | Central | 0 | 0 | 0 | 0 | 0 | 0 |
| 5912 | Pig | Central | 0 | 0 | 0 | 0 | 0 | 0 |
| 5913 | Pig | Central | 0 | 0 | 0 | 0 | 0 | 0 |
| 5914 | Pig | Central | 0 | 0 | 0 | 0 | 0 | 0 |
| 5915 | Pig | Central | 0 | 0 | 1 | 0 | 0 | 1 |
| 5916 | Pig | Central | 0 | 0 | 0 | 0 | 0 | 0 |
| 5917 | Pig | Central | 0 | 0 | 0 | 0 | 0 | 0 |
| 5918 | Pig | Central | 0 | 0 | 0 | 0 | 0 | 0 |
| 5919 | Pig | Central | 0 | 0 | 0 | 0 | 0 | 0 |
| 5920 | Pig | Central | 0 | 0 | 0 | 0 | 0 | 0 |
| 5921 | Pig | Central | 0 | 0 | 0 | 0 | 0 | 0 |
| 5922 | Pig | Central | 0 | 0 | 0 | 0 | 0 | 0 |
| 5923 | Pig | Central | 0 | 0 | 0 | 0 | 0 | 0 |
| 5924 | Pig | Central | 0 | 0 | 0 | 0 | 0 | 0 |
| 5925 | Pig | Central | 0 | 0 | 0 | 0 | 0 | 0 |
| 5926 | Pig | Central | 0 | 0 | 0 | 0 | 0 | 0 |
| 5927 | Pig | Central | 0 | 0 | 0 | 0 | 0 | 0 |
| 5928 | Pig | Central | 0 | 0 | 0 | 0 | 0 | 0 |
| 5929 | Pig | Central | 0 | 0 | 0 | 0 | 0 | 0 |
| 5930 | Pig | Central | 0 | 0 | 0 | 0 | 0 | 0 |
| 5931 | Pig | Central | 0 | 0 | 0 | 0 | 0 | 0 |
| 5932 | Pig | Central | 0 | 0 | 0 | 0 | 0 | 0 |
| 5933 | Pig | Central | 0 | 0 | 0 | 0 | 0 | 0 |
| 5934 | Pig | Central | 0 | 0 | 0 | 0 | 0 | 0 |
| 5935 | Pig | Central | 0 | 0 | 0 | 0 | 0 | 0 |
| 5936 | Pig | Central | 0 | 0 | 0 | 0 | 0 | 0 |
| 5937 | Pig | Central | 0 | 0 | 0 | 0 | 0 | 0 |
| 5938 | Pig | Central | 0 | 0 | 0 | 0 | 0 | 0 |
| 5939 | Pig | Central | 0 | 0 | 0 | 0 | 0 | 0 |
| 5940 | Pig | Central | 0 | 0 | 0 | 0 | 0 | 0 |
| 5941 | Pig | Central | 0 | 0 | 0 | 0 | 0 | 0 |
| 5942 | Pig | Central | 0 | 0 | 0 | 0 | 0 | 0 |
| 5943 | Pig | Central | 0 | 0 | 0 | 0 | 0 | 0 |
| 5944 | Pig | Central | 0 | 0 | 0 | 0 | 0 | 0 |
| 5945 | Pig | Central | 0 | 0 | 0 | 0 | 0 | 0 |
| 5946 | Pig | Central | 0 | 0 | 0 | 0 | 0 | 0 |
| 5947 | Pig | Central | 0 | 0 | 0 | 0 | 0 | 0 |
| 5948 | Pig | Central | 0 | 0 | 0 | 0 | 0 | 0 |
| 5949 | Pig | Central | 1 | 0 | 0 | 1 | 0 | 1 |
| 5950 | Pig | Central | 0 | 0 | 0 | 0 | 0 | 0 |
| 5951 | Pig | Central | 0 | 0 | 0 | 0 | 0 | 0 |

|      |     |         |   |   |   |   |   |   |
|------|-----|---------|---|---|---|---|---|---|
| 5952 | Pig | Central | 0 | 0 | 0 | 0 | 0 | 0 |
| 5953 | Pig | Central | 0 | 0 | 0 | 0 | 0 | 0 |
| 5954 | Pig | Central | 0 | 0 | 0 | 0 | 0 | 0 |
| 5955 | Pig | Central | 0 | 0 | 0 | 0 | 0 | 0 |
| 5956 | Pig | Central | 0 | 0 | 0 | 0 | 0 | 0 |
| 5957 | Pig | Central | 0 | 0 | 0 | 0 | 0 | 0 |
| 5958 | Pig | Central | 0 | 0 | 0 | 0 | 0 | 0 |
| 5959 | Pig | Central | 0 | 0 | 0 | 0 | 0 | 0 |
| 5960 | Pig | Central | 0 | 0 | 0 | 0 | 0 | 0 |
| 5961 | Pig | Central | 0 | 0 | 0 | 1 | 0 | 1 |
| 5962 | Pig | Central | 0 | 0 | 0 | 0 | 0 | 0 |
| 5963 | Pig | Central | 0 | 0 | 0 | 0 | 0 | 0 |
| 5964 | Pig | Central | 0 | 0 | 0 | 0 | 0 | 0 |
| 5965 | Pig | Central | 0 | 0 | 0 | 0 | 0 | 0 |
| 5966 | Pig | Central | 0 | 0 | 0 | 0 | 0 | 0 |
| 5967 | Pig | Central | 0 | 0 | 0 | 1 | 0 | 1 |
| 5968 | Pig | Central | 0 | 0 | 0 | 0 | 0 | 0 |
| 5969 | Pig | Central | 0 | 0 | 0 | 0 | 0 | 0 |
| 5970 | Pig | Central | 0 | 0 | 0 | 0 | 0 | 0 |
| 5971 | Pig | Central | 0 | 0 | 0 | 0 | 0 | 0 |
| 5972 | Pig | Central | 0 | 0 | 0 | 0 | 0 | 0 |
| 5973 | Pig | Central | 0 | 0 | 0 | 0 | 0 | 0 |
| 5974 | Pig | Central | 0 | 0 | 0 | 0 | 0 | 0 |
| 5975 | Pig | Central | 0 | 0 | 0 | 0 | 0 | 0 |
| 5976 | Pig | Central | 0 | 0 | 0 | 1 | 0 | 1 |
| 5977 | Pig | Central | 0 | 0 | 0 | 1 | 0 | 1 |
| 5978 | Pig | Central | 0 | 0 | 0 | 0 | 0 | 0 |
| 5979 | Pig | Central | 0 | 0 | 0 | 0 | 0 | 0 |
| 5980 | Pig | Central | 0 | 0 | 0 | 0 | 0 | 0 |
| 5981 | Pig | Central | 0 | 0 | 0 | 0 | 0 | 0 |
| 5982 | Pig | Central | 0 | 0 | 0 | 0 | 0 | 0 |
| 5983 | Pig | Central | 0 | 0 | 0 | 0 | 0 | 0 |
| 5984 | Pig | Central | 0 | 0 | 0 | 0 | 0 | 0 |
| 5985 | Pig | Central | 0 | 0 | 0 | 0 | 0 | 0 |
| 5986 | Pig | Central | 0 | 0 | 0 | 0 | 0 | 0 |
| 5987 | Pig | Central | 0 | 0 | 0 | 0 | 0 | 0 |
| 5988 | Pig | Central | 0 | 0 | 0 | 0 | 0 | 0 |
| 5989 | Pig | Central | 0 | 0 | 0 | 0 | 0 | 0 |
| 5990 | Pig | Central | 0 | 0 | 0 | 0 | 0 | 0 |
| 5991 | Pig | Central | 0 | 0 | 0 | 0 | 0 | 0 |
| 5992 | Pig | Central | 0 | 0 | 0 | 0 | 0 | 0 |
| 5993 | Pig | Central | 0 | 0 | 0 | 0 | 0 | 0 |
| 5994 | Pig | Central | 0 | 0 | 0 | 0 | 0 | 0 |
| 5995 | Pig | Central | 0 | 0 | 0 | 0 | 0 | 0 |
| 5996 | Pig | Central | 0 | 0 | 0 | 0 | 0 | 0 |
| 5997 | Pig | Central | 0 | 0 | 0 | 0 | 0 | 0 |
| 5998 | Pig | Central | 0 | 0 | 0 | 0 | 0 | 0 |
| 5999 | Pig | Central | 0 | 0 | 0 | 0 | 0 | 0 |

|      |     |         |   |   |   |   |   |   |
|------|-----|---------|---|---|---|---|---|---|
| 6000 | Pig | Central | 0 | 0 | 0 | 0 | 0 | 0 |
| 6001 | Pig | Central | 0 | 0 | 0 | 0 | 0 | 0 |
| 6002 | Pig | Central | 0 | 0 | 0 | 0 | 0 | 0 |
| 6003 | Pig | Central | 0 | 0 | 0 | 0 | 0 | 0 |
| 6004 | Pig | Central | 0 | 0 | 0 | 0 | 0 | 0 |
| 6005 | Pig | Central | 0 | 0 | 0 | 1 | 0 | 1 |
| 6006 | Pig | Central | 0 | 0 | 0 | 0 | 0 | 0 |
| 6007 | Pig | Central | 0 | 0 | 0 | 0 | 0 | 0 |
| 6008 | Pig | Central | 0 | 0 | 0 | 0 | 0 | 0 |
| 6009 | Pig | Central | 0 | 0 | 0 | 0 | 0 | 0 |
| 6010 | Pig | Central | 0 | 0 | 0 | 0 | 0 | 0 |
| 6011 | Pig | Central | 0 | 0 | 0 | 0 | 0 | 0 |
| 6012 | Pig | Central | 0 | 0 | 0 | 0 | 0 | 0 |
| 6013 | Pig | Central | 0 | 0 | 0 | 0 | 0 | 0 |
| 6014 | Pig | Central | 0 | 0 | 0 | 0 | 0 | 0 |
| 6015 | Pig | Central | 0 | 0 | 0 | 0 | 0 | 0 |
| 6016 | Pig | Central | 0 | 0 | 0 | 0 | 0 | 0 |
| 6017 | Pig | Central | 0 | 0 | 0 | 0 | 0 | 0 |
| 6018 | Pig | Central | 0 | 0 | 0 | 0 | 0 | 0 |
| 6019 | Pig | Central | 0 | 0 | 0 | 0 | 0 | 0 |
| 6020 | Pig | Central | 0 | 0 | 0 | 0 | 0 | 0 |
| 6021 | Pig | Central | 0 | 0 | 0 | 0 | 0 | 0 |
| 6022 | Pig | Central | 0 | 0 | 0 | 0 | 0 | 0 |
| 6023 | Pig | Central | 0 | 0 | 0 | 0 | 0 | 0 |
| 6024 | Pig | Central | 0 | 0 | 0 | 0 | 0 | 0 |
| 6025 | Pig | Central | 0 | 0 | 0 | 0 | 0 | 0 |
| 6026 | Pig | Central | 0 | 0 | 0 | 0 | 0 | 0 |
| 6027 | Pig | Central | 0 | 0 | 0 | 0 | 0 | 0 |
| 6028 | Pig | Central | 0 | 0 | 0 | 0 | 0 | 0 |
| 6029 | Pig | Central | 0 | 0 | 0 | 0 | 0 | 0 |
| 6030 | Pig | Central | 0 | 0 | 0 | 0 | 0 | 0 |
| 6031 | Pig | Central | 0 | 0 | 0 | 0 | 0 | 0 |
| 6032 | Pig | Central | 0 | 0 | 0 | 0 | 0 | 0 |
| 6033 | Pig | Central | 0 | 0 | 0 | 0 | 0 | 0 |
| 6034 | Pig | Central | 0 | 0 | 0 | 0 | 0 | 0 |
| 6035 | Pig | Central | 0 | 0 | 0 | 0 | 0 | 0 |
| 6036 | Pig | Central | 0 | 0 | 0 | 0 | 0 | 0 |
| 6037 | Pig | Central | 0 | 0 | 0 | 0 | 0 | 0 |
| 6038 | Pig | Central | 0 | 0 | 0 | 0 | 0 | 0 |
| 6039 | Pig | Central | 0 | 0 | 0 | 0 | 0 | 0 |
| 6040 | Pig | Central | 0 | 0 | 0 | 0 | 0 | 0 |
| 6041 | Pig | Central | 0 | 0 | 0 | 0 | 0 | 0 |
| 6042 | Pig | Central | 0 | 0 | 0 | 0 | 0 | 0 |
| 6043 | Pig | Central | 0 | 0 | 0 | 0 | 0 | 0 |
| 6044 | Pig | Central | 0 | 0 | 0 | 0 | 0 | 0 |
| 6045 | Pig | Central | 0 | 0 | 0 | 0 | 0 | 0 |
| 6046 | Pig | Central | 0 | 0 | 0 | 0 | 0 | 0 |
| 6047 | Pig | Central | 0 | 0 | 0 | 0 | 0 | 0 |

|      |     |         |   |   |   |   |   |   |
|------|-----|---------|---|---|---|---|---|---|
| 6048 | Pig | Central | 0 | 0 | 0 | 0 | 0 | 0 |
| 6049 | Pig | Central | 0 | 0 | 0 | 0 | 0 | 0 |
| 6050 | Pig | Central | 0 | 0 | 0 | 0 | 0 | 0 |
| 6051 | Pig | Central | 0 | 0 | 0 | 0 | 0 | 0 |
| 6052 | Pig | Central | 0 | 0 | 0 | 0 | 0 | 0 |
| 6053 | Pig | Central | 0 | 0 | 0 | 0 | 0 | 0 |
| 6054 | Pig | Central | 0 | 0 | 0 | 0 | 0 | 0 |
| 6055 | Pig | Central | 0 | 0 | 0 | 0 | 0 | 0 |
| 6056 | Pig | Central | 0 | 0 | 0 | 0 | 0 | 0 |
| 6057 | Pig | Central | 0 | 0 | 0 | 0 | 0 | 0 |
| 6058 | Pig | Central | 0 | 0 | 0 | 0 | 0 | 0 |
| 6059 | Pig | Central | 0 | 0 | 0 | 0 | 0 | 0 |
| 6060 | Pig | Central | 0 | 0 | 0 | 0 | 0 | 0 |
| 6061 | Pig | Central | 0 | 0 | 0 | 0 | 0 | 0 |
| 6062 | Pig | Central | 0 | 0 | 0 | 0 | 0 | 0 |
| 6063 | Pig | Central | 0 | 0 | 0 | 0 | 0 | 0 |
| 6064 | Pig | Central | 0 | 0 | 0 | 0 | 0 | 0 |
| 6065 | Pig | Central | 0 | 0 | 0 | 0 | 0 | 0 |
| 6066 | Pig | Central | 0 | 0 | 0 | 0 | 0 | 0 |
| 6067 | Pig | Central | 0 | 0 | 0 | 0 | 0 | 0 |
| 6068 | Pig | Central | 0 | 0 | 0 | 0 | 0 | 0 |
| 6069 | Pig | Central | 0 | 0 | 0 | 0 | 0 | 0 |
| 6070 | Pig | Central | 0 | 0 | 0 | 0 | 0 | 0 |
| 6071 | Pig | Central | 0 | 0 | 0 | 0 | 0 | 0 |
| 6072 | Pig | Central | 0 | 0 | 0 | 0 | 0 | 0 |
| 6073 | Pig | Central | 0 | 0 | 0 | 0 | 0 | 0 |
| 6074 | Pig | Central | 0 | 0 | 0 | 0 | 0 | 0 |
| 6075 | Pig | Central | 0 | 0 | 0 | 0 | 0 | 0 |
| 6076 | Pig | Central | 0 | 0 | 0 | 0 | 0 | 0 |
| 6077 | Pig | Central | 0 | 0 | 0 | 0 | 0 | 0 |
| 6078 | Pig | Central | 0 | 0 | 0 | 0 | 0 | 0 |
| 6079 | Pig | Central | 0 | 0 | 0 | 0 | 0 | 0 |
| 6080 | Pig | Central | 0 | 0 | 0 | 0 | 0 | 0 |
| 6081 | Pig | Central | 0 | 0 | 0 | 0 | 0 | 0 |
| 6082 | Pig | Central | 0 | 0 | 0 | 0 | 0 | 0 |
| 6083 | Pig | Central | 0 | 0 | 0 | 0 | 0 | 0 |
| 6084 | Pig | Central | 0 | 0 | 0 | 0 | 0 | 0 |
| 6085 | Pig | Central | 0 | 0 | 0 | 0 | 0 | 0 |
| 6086 | Pig | Central | 0 | 0 | 0 | 0 | 0 | 0 |
| 6087 | Pig | Central | 0 | 0 | 0 | 0 | 0 | 0 |
| 6088 | Pig | Central | 0 | 0 | 0 | 0 | 0 | 0 |
| 6089 | Pig | Central | 0 | 0 | 0 | 0 | 0 | 0 |
| 6090 | Pig | Central | 0 | 0 | 0 | 0 | 0 | 0 |
| 6091 | Pig | Central | 0 | 0 | 0 | 0 | 0 | 0 |
| 6092 | Pig | Central | 0 | 0 | 0 | 0 | 0 | 0 |
| 6093 | Pig | Central | 0 | 0 | 0 | 1 | 0 | 1 |
| 6094 | Pig | Central | 0 | 0 | 0 | 0 | 0 | 0 |
| 6095 | Pig | Central | 0 | 0 | 0 | 0 | 0 | 0 |

|      |     |         |   |   |   |   |   |   |
|------|-----|---------|---|---|---|---|---|---|
| 6096 | Pig | Central | 0 | 0 | 0 | 1 | 0 | 1 |
| 6097 | Pig | Central | 0 | 0 | 0 | 0 | 0 | 0 |
| 6098 | Pig | Central | 0 | 0 | 0 | 0 | 0 | 0 |
| 6099 | Pig | Central | 0 | 0 | 1 | 1 | 0 | 1 |
| 6100 | Pig | Central | 0 | 0 | 0 | 0 | 0 | 0 |
| 6101 | Pig | Central | 0 | 0 | 0 | 0 | 0 | 0 |
| 6102 | Pig | Central | 0 | 0 | 0 | 0 | 0 | 0 |
| 6103 | Pig | Central | 0 | 0 | 0 | 0 | 0 | 0 |
| 6104 | Pig | Central | 0 | 0 | 0 | 0 | 0 | 0 |
| 6105 | Pig | Central | 0 | 0 | 0 | 0 | 0 | 0 |
| 6106 | Pig | Central | 0 | 0 | 0 | 0 | 0 | 0 |
| 6107 | Pig | Central | 0 | 0 | 0 | 0 | 0 | 0 |
| 6108 | Pig | Central | 0 | 0 | 0 | 0 | 0 | 0 |
| 6109 | Pig | Central | 0 | 0 | 0 | 0 | 0 | 0 |
| 6110 | Pig | Central | 0 | 0 | 0 | 0 | 0 | 0 |
| 6111 | Pig | Central | 0 | 0 | 0 | 0 | 0 | 0 |
| 6112 | Pig | Central | 0 | 0 | 0 | 0 | 0 | 0 |
| 6113 | Pig | Central | 0 | 0 | 0 | 0 | 0 | 0 |
| 6114 | Pig | Central | 0 | 0 | 0 | 0 | 0 | 0 |
| 6115 | Pig | Central | 0 | 0 | 0 | 0 | 0 | 0 |
| 6116 | Pig | Central | 0 | 0 | 0 | 0 | 0 | 0 |
| 6117 | Pig | Central | 0 | 0 | 0 | 0 | 0 | 0 |
| 6118 | Pig | Central | 0 | 0 | 0 | 0 | 0 | 0 |
| 6119 | Pig | Central | 0 | 0 | 0 | 0 | 0 | 0 |
| 6120 | Pig | Central | 0 | 0 | 0 | 0 | 0 | 0 |
| 6121 | Pig | Central | 0 | 0 | 0 | 0 | 0 | 0 |
| 6122 | Pig | Central | 0 | 0 | 0 | 0 | 0 | 0 |
| 6123 | Pig | Central | 0 | 0 | 0 | 0 | 0 | 0 |
| 6124 | Pig | Central | 0 | 0 | 0 | 0 | 0 | 0 |
| 6125 | Pig | Central | 0 | 0 | 0 | 0 | 0 | 0 |
| 6126 | Pig | Central | 0 | 0 | 0 | 0 | 0 | 0 |
| 6127 | Pig | Central | 0 | 0 | 0 | 0 | 0 | 0 |
| 6128 | Pig | Central | 0 | 0 | 0 | 0 | 0 | 0 |
| 6129 | Pig | Central | 0 | 0 | 0 | 1 | 0 | 1 |
| 6130 | Pig | Central | 0 | 0 | 0 | 0 | 0 | 0 |
| 6131 | Pig | Central | 0 | 0 | 0 | 0 | 0 | 0 |
| 6132 | Pig | Central | 0 | 0 | 0 | 0 | 0 | 0 |
| 6133 | Pig | Central | 0 | 0 | 0 | 0 | 0 | 0 |
| 6134 | Pig | Central | 0 | 0 | 0 | 0 | 0 | 0 |
| 6135 | Pig | Central | 0 | 0 | 0 | 0 | 0 | 0 |
| 6136 | Pig | Central | 0 | 0 | 0 | 0 | 0 | 0 |
| 6137 | Pig | Central | 0 | 0 | 0 | 0 | 0 | 0 |
| 6138 | Pig | Central | 0 | 0 | 0 | 0 | 0 | 0 |
| 6139 | Pig | Central | 0 | 0 | 0 | 0 | 0 | 0 |
| 6140 | Pig | Central | 0 | 0 | 0 | 0 | 0 | 0 |
| 6141 | Pig | Central | 1 | 0 | 0 | 0 | 0 | 1 |
| 6142 | Pig | Central | 0 | 0 | 0 | 0 | 0 | 0 |
| 6143 | Pig | Central | 0 | 0 | 0 | 0 | 0 | 0 |



|      |     |         |   |   |   |   |   |   |
|------|-----|---------|---|---|---|---|---|---|
| 6144 | Pig | Central | 0 | 0 | 0 | 0 | 0 | 0 |
| 6145 | Pig | Central | 0 | 0 | 0 | 0 | 0 | 0 |
| 6146 | Pig | Central | 0 | 0 | 0 | 0 | 0 | 0 |
| 6147 | Pig | Central | 0 | 0 | 0 | 0 | 0 | 0 |
| 6148 | Pig | Central | 0 | 0 | 0 | 0 | 0 | 0 |
| 6149 | Pig | Central | 0 | 0 | 0 | 0 | 0 | 0 |
| 6150 | Pig | Central | 0 | 0 | 0 | 0 | 0 | 0 |
| 6151 | Pig | Central | 0 | 0 | 0 | 0 | 0 | 0 |
| 6152 | Pig | Central | 0 | 0 | 0 | 1 | 0 | 1 |
| 6153 | Pig | Central | 0 | 0 | 0 | 0 | 0 | 0 |
| 6154 | Pig | Central | 0 | 0 | 0 | 0 | 0 | 0 |
| 6155 | Pig | Central | 0 | 0 | 0 | 0 | 0 | 0 |
| 6156 | Pig | Central | 0 | 0 | 0 | 0 | 0 | 0 |
| 6157 | Pig | Central | 0 | 0 | 0 | 0 | 0 | 0 |
| 6158 | Pig | Central | 0 | 0 | 0 | 0 | 0 | 0 |
| 6159 | Pig | Central | 0 | 0 | 0 | 0 | 0 | 0 |
| 6160 | Pig | Central | 0 | 0 | 0 | 0 | 0 | 0 |
| 6161 | Pig | Central | 0 | 0 | 0 | 0 | 0 | 0 |
| 6162 | Pig | Central | 0 | 0 | 0 | 0 | 0 | 0 |
| 6163 | Pig | Central | 0 | 0 | 0 | 0 | 0 | 0 |
| 6164 | Pig | Central | 0 | 0 | 0 | 0 | 0 | 0 |
| 6165 | Pig | Central | 0 | 0 | 0 | 0 | 0 | 0 |
| 6166 | Pig | Central | 0 | 0 | 0 | 0 | 0 | 0 |
| 6167 | Pig | Central | 0 | 0 | 0 | 0 | 0 | 0 |
| 6168 | Pig | Central | 0 | 0 | 0 | 0 | 0 | 0 |
| 6169 | Pig | Central | 0 | 0 | 0 | 0 | 0 | 0 |
| 6170 | Pig | Central | 0 | 0 | 0 | 0 | 0 | 0 |
| 6171 | Pig | Central | 0 | 0 | 0 | 0 | 0 | 0 |
| 6172 | Pig | Central | 0 | 0 | 0 | 0 | 0 | 0 |
| 6173 | Pig | Central | 0 | 0 | 0 | 0 | 0 | 0 |
| 6174 | Pig | Central | 0 | 0 | 0 | 0 | 0 | 0 |
| 6175 | Pig | Central | 0 | 0 | 0 | 0 | 0 | 0 |
| 6176 | Pig | Central | 0 | 0 | 0 | 0 | 0 | 0 |
| 6177 | Pig | Central | 0 | 0 | 0 | 0 | 0 | 0 |
| 6178 | Pig | Central | 0 | 0 | 0 | 0 | 0 | 0 |
| 6179 | Pig | Central | 0 | 0 | 0 | 0 | 0 | 0 |
| 6180 | Pig | Central | 0 | 0 | 0 | 0 | 0 | 0 |
| 6181 | Pig | Central | 0 | 0 | 0 | 0 | 0 | 0 |
| 6182 | Pig | Central | 0 | 0 | 0 | 0 | 0 | 0 |
| 6183 | Pig | Central | 0 | 0 | 0 | 0 | 0 | 0 |
| 6184 | Pig | Central | 0 | 0 | 0 | 0 | 0 | 0 |
| 6185 | Pig | Central | 0 | 0 | 0 | 0 | 0 | 0 |
| 6186 | Pig | Central | 0 | 0 | 0 | 0 | 0 | 0 |
| 6187 | Pig | Central | 0 | 0 | 0 | 0 | 0 | 0 |
| 6188 | Pig | Central | 0 | 0 | 0 | 0 | 0 | 0 |
| 6189 | Pig | Central | 0 | 0 | 0 | 0 | 0 | 0 |
| 6190 | Pig | Central | 0 | 0 | 0 | 0 | 0 | 0 |
| 6191 | Pig | Central | 0 | 0 | 0 | 0 | 0 | 0 |

|      |     |         |   |   |   |   |   |   |
|------|-----|---------|---|---|---|---|---|---|
| 6192 | Pig | Central | 0 | 0 | 0 | 0 | 0 | 0 |
| 6193 | Pig | Central | 0 | 0 | 0 | 0 | 0 | 0 |
| 6194 | Pig | Central | 0 | 0 | 0 | 0 | 0 | 0 |
| 6195 | Pig | Central | 0 | 0 | 0 | 0 | 0 | 0 |
| 6196 | Pig | Central | 0 | 0 | 0 | 0 | 0 | 0 |
| 6197 | Pig | Central | 0 | 0 | 0 | 0 | 0 | 0 |
| 6198 | Pig | Central | 0 | 0 | 0 | 0 | 0 | 0 |
| 6199 | Pig | Central | 0 | 0 | 0 | 0 | 0 | 0 |
| 6200 | Pig | Central | 0 | 0 | 0 | 0 | 0 | 0 |
| 6201 | Pig | Central | 0 | 0 | 0 | 0 | 0 | 0 |
| 6202 | Pig | Central | 0 | 0 | 0 | 0 | 0 | 0 |
| 6203 | Pig | Central | 0 | 0 | 0 | 0 | 0 | 0 |
| 6204 | Pig | Central | 0 | 0 | 0 | 0 | 0 | 0 |
| 6205 | Pig | Central | 0 | 0 | 0 | 0 | 0 | 0 |
| 6206 | Pig | Central | 0 | 0 | 0 | 0 | 0 | 0 |
| 6207 | Pig | Central | 0 | 0 | 0 | 0 | 0 | 0 |
| 6208 | Pig | Central | 0 | 0 | 0 | 1 | 0 | 1 |
| 6209 | Pig | Central | 0 | 0 | 0 | 0 | 0 | 0 |
| 6210 | Pig | Central | 0 | 0 | 0 | 1 | 0 | 1 |
| 6211 | Pig | Central | 0 | 0 | 0 | 1 | 0 | 1 |
| 6212 | Pig | Central | 0 | 0 | 0 | 0 | 0 | 0 |
| 6213 | Pig | Central | 0 | 0 | 0 | 0 | 0 | 0 |
| 6214 | Pig | Central | 0 | 0 | 0 | 1 | 0 | 1 |
| 6215 | Pig | Central | 0 | 0 | 0 | 1 | 0 | 1 |
| 6216 | Pig | Central | 0 | 0 | 0 | 0 | 0 | 0 |
| 6217 | Pig | Central | 0 | 0 | 0 | 0 | 0 | 0 |
| 6218 | Pig | Central | 0 | 0 | 0 | 0 | 0 | 0 |
| 6219 | Pig | Central | 0 | 0 | 0 | 0 | 0 | 0 |
| 6220 | Pig | Central | 0 | 0 | 0 | 0 | 0 | 0 |
| 6221 | Pig | Central | 0 | 0 | 0 | 0 | 0 | 0 |
| 6222 | Pig | Central | 0 | 0 | 0 | 0 | 0 | 0 |
| 6223 | Pig | Central | 0 | 0 | 0 | 0 | 0 | 0 |
| 6224 | Pig | Central | 0 | 0 | 0 | 1 | 0 | 1 |
| 6225 | Pig | Central | 0 | 0 | 0 | 0 | 0 | 0 |
| 6226 | Pig | Central | 0 | 0 | 0 | 0 | 0 | 0 |
| 6227 | Pig | Central | 0 | 0 | 0 | 1 | 0 | 1 |
| 6228 | Pig | Central | 0 | 0 | 0 | 0 | 0 | 0 |
| 6229 | Pig | Central | 0 | 0 | 0 | 0 | 0 | 0 |
| 6230 | Pig | Central | 0 | 0 | 0 | 0 | 0 | 0 |
| 6231 | Pig | Central | 0 | 0 | 0 | 0 | 0 | 0 |
| 6232 | Pig | Central | 0 | 0 | 0 | 0 | 0 | 0 |
| 6233 | Pig | Central | 0 | 0 | 0 | 0 | 0 | 0 |
| 6234 | Pig | Central | 0 | 0 | 0 | 0 | 0 | 0 |
| 6235 | Pig | Central | 0 | 0 | 0 | 0 | 0 | 0 |
| 6236 | Pig | Central | 0 | 0 | 0 | 1 | 0 | 1 |
| 6237 | Pig | Central | 0 | 0 | 0 | 1 | 0 | 1 |
| 6238 | Pig | Central | 0 | 0 | 0 | 0 | 0 | 0 |
| 6239 | Pig | Central | 0 | 0 | 0 | 0 | 0 | 0 |

|      |     |         |   |   |   |   |   |   |
|------|-----|---------|---|---|---|---|---|---|
| 6240 | Pig | Central | 0 | 0 | 0 | 0 | 0 | 0 |
| 6241 | Pig | Central | 0 | 0 | 0 | 0 | 0 | 0 |
| 6242 | Pig | Central | 0 | 0 | 0 | 0 | 0 | 0 |
| 6243 | Pig | Central | 0 | 0 | 0 | 0 | 0 | 0 |
| 6244 | Pig | Central | 0 | 0 | 0 | 0 | 0 | 0 |
| 6245 | Pig | Central | 0 | 0 | 0 | 1 | 0 | 1 |
| 6246 | Pig | Central | 0 | 0 | 0 | 0 | 0 | 0 |
| 6247 | Pig | Central | 0 | 0 | 0 | 1 | 0 | 1 |
| 6248 | Pig | Central | 0 | 0 | 0 | 0 | 0 | 0 |
| 6249 | Pig | Central | 0 | 0 | 0 | 1 | 0 | 1 |
| 6250 | Pig | Central | 0 | 0 | 0 | 0 | 0 | 0 |
| 6251 | Pig | Central | 0 | 0 | 0 | 0 | 0 | 0 |
| 6252 | Pig | Central | 0 | 0 | 0 | 0 | 0 | 0 |
| 6253 | Pig | Central | 0 | 0 | 0 | 1 | 0 | 1 |
| 6254 | Pig | Central | 0 | 0 | 0 | 0 | 0 | 0 |
| 6255 | Pig | Central | 0 | 0 | 0 | 0 | 0 | 0 |
| 6256 | Pig | Central | 0 | 0 | 0 | 1 | 0 | 1 |
| 6257 | Pig | Central | 0 | 0 | 0 | 1 | 0 | 1 |
| 6258 | Pig | Central | 0 | 0 | 0 | 1 | 0 | 1 |
| 6259 | Pig | Central | 0 | 0 | 0 | 0 | 0 | 0 |
| 6260 | Pig | Central | 0 | 0 | 0 | 1 | 0 | 1 |
| 6261 | Pig | Central | 0 | 0 | 0 | 1 | 0 | 1 |
| 6262 | Pig | Central | 0 | 0 | 0 | 0 | 0 | 0 |
| 6263 | Pig | Central | 0 | 0 | 0 | 0 | 0 | 0 |
| 6264 | Pig | Central | 0 | 0 | 1 | 1 | 0 | 1 |
| 6265 | Pig | Central | 0 | 0 | 0 | 1 | 0 | 1 |
| 6266 | Pig | Central | 0 | 0 | 0 | 1 | 0 | 1 |
| 6267 | Pig | Central | 0 | 0 | 0 | 0 | 0 | 0 |
| 6268 | Pig | Central | 0 | 0 | 0 | 1 | 0 | 1 |
| 6269 | Pig | Central | 0 | 0 | 0 | 0 | 0 | 0 |
| 6270 | Pig | Central | 0 | 0 | 0 | 0 | 0 | 0 |
| 6271 | Pig | Central | 0 | 0 | 0 | 1 | 0 | 1 |
| 6272 | Pig | Central | 0 | 0 | 0 | 0 | 0 | 0 |
| 6273 | Pig | Central | 0 | 0 | 0 | 1 | 0 | 1 |
| 6274 | Pig | Central | 0 | 0 | 0 | 1 | 0 | 1 |
| 6275 | Pig | Central | 0 | 0 | 0 | 0 | 0 | 0 |
| 6276 | Pig | Central | 0 | 0 | 0 | 0 | 0 | 0 |
| 6277 | Pig | Central | 0 | 0 | 0 | 0 | 0 | 0 |
| 6278 | Pig | Central | 0 | 0 | 0 | 0 | 0 | 1 |
| 6279 | Pig | Central | 0 | 0 | 0 | 0 | 0 | 0 |
| 6280 | Pig | Central | 0 | 0 | 0 | 0 | 0 | 0 |
| 6281 | Pig | Central | 0 | 0 | 0 | 1 | 0 | 1 |
| 6282 | Pig | Central | 0 | 0 | 0 | 1 | 0 | 1 |
| 6283 | Pig | Central | 0 | 0 | 0 | 0 | 0 | 0 |
| 6284 | Pig | Central | 0 | 0 | 0 | 1 | 0 | 1 |
| 6285 | Pig | Central | 0 | 0 | 0 | 1 | 0 | 1 |
| 6286 | Pig | Central | 0 | 0 | 0 | 1 | 0 | 1 |
| 6287 | Pig | Central | 0 | 0 | 0 | 1 | 0 | 1 |

|      |     |         |   |   |   |   |   |   |
|------|-----|---------|---|---|---|---|---|---|
| 6288 | Pig | Central | 0 | 0 | 0 | 0 | 0 | 0 |
| 6289 | Pig | Central | 0 | 0 | 0 | 0 | 0 | 0 |
| 6290 | Pig | Central | 0 | 0 | 0 | 1 | 0 | 1 |
| 6291 | Pig | Central | 0 | 0 | 0 | 0 | 0 | 0 |
| 6292 | Pig | Central | 0 | 0 | 0 | 0 | 0 | 0 |
| 6293 | Pig | Central | 0 | 0 | 0 | 0 | 0 | 0 |
| 6294 | Pig | Central | 0 | 0 | 0 | 0 | 0 | 0 |
| 6295 | Pig | Central | 0 | 0 | 0 | 0 | 0 | 1 |
| 6296 | Pig | Central | 0 | 0 | 0 | 0 | 0 | 0 |
| 6297 | Pig | Central | 0 | 0 | 0 | 0 | 0 | 0 |
| 6298 | Pig | Central | 0 | 0 | 0 | 0 | 0 | 0 |
| 6299 | Pig | Central | 0 | 0 | 0 | 0 | 0 | 0 |
| 6300 | Pig | Central | 0 | 0 | 0 | 0 | 0 | 0 |
| 6301 | Pig | Central | 0 | 0 | 0 | 0 | 0 | 0 |
| 6302 | Pig | Central | 0 | 0 | 0 | 0 | 0 | 0 |
| 6303 | Pig | Central | 0 | 0 | 0 | 0 | 0 | 0 |
| 6304 | Pig | Central | 0 | 0 | 0 | 0 | 0 | 0 |
| 6305 | Pig | Central | 0 | 0 | 0 | 0 | 0 | 0 |
| 6306 | Pig | Central | 0 | 0 | 0 | 0 | 0 | 0 |
| 6307 | Pig | Central | 0 | 0 | 0 | 0 | 0 | 0 |
| 6308 | Pig | Central | 0 | 0 | 0 | 0 | 0 | 0 |
| 6309 | Pig | Central | 0 | 0 | 0 | 0 | 0 | 0 |
| 6310 | Pig | Central | 0 | 0 | 0 | 0 | 0 | 0 |
| 6311 | Pig | Central | 0 | 0 | 0 | 0 | 0 | 0 |
| 6312 | Pig | Central | 0 | 0 | 0 | 0 | 0 | 0 |
| 6313 | Pig | Central | 0 | 0 | 0 | 0 | 0 | 0 |
| 6314 | Pig | Central | 0 | 0 | 0 | 0 | 0 | 0 |
| 6315 | Pig | Central | 0 | 0 | 0 | 0 | 0 | 0 |
| 6316 | Pig | Central | 0 | 0 | 0 | 0 | 0 | 0 |
| 6317 | Pig | Central | 0 | 0 | 0 | 0 | 0 | 0 |
| 6318 | Pig | Central | 0 | 0 | 0 | 0 | 0 | 0 |
| 6319 | Pig | Central | 0 | 0 | 0 | 0 | 0 | 0 |
| 6320 | Pig | Central | 0 | 0 | 0 | 0 | 0 | 0 |
| 6321 | Pig | Central | 0 | 0 | 0 | 0 | 0 | 0 |
| 6322 | Pig | Central | 0 | 0 | 0 | 0 | 0 | 0 |
| 6323 | Pig | Central | 0 | 0 | 0 | 0 | 0 | 0 |
| 6324 | Pig | Central | 0 | 0 | 0 | 0 | 0 | 0 |
| 6325 | Pig | Central | 0 | 0 | 0 | 0 | 0 | 0 |
| 6326 | Pig | Central | 0 | 0 | 0 | 0 | 0 | 0 |
| 6327 | Pig | Central | 0 | 0 | 0 | 0 | 0 | 0 |
| 6328 | Pig | Central | 0 | 0 | 0 | 0 | 0 | 0 |
| 6329 | Pig | Central | 0 | 0 | 0 | 0 | 0 | 0 |
| 6330 | Pig | Central | 0 | 0 | 0 | 0 | 0 | 0 |
| 6331 | Pig | Central | 0 | 0 | 0 | 0 | 0 | 0 |
| 6332 | Pig | Central | 0 | 0 | 0 | 0 | 0 | 0 |
| 6333 | Pig | Central | 0 | 0 | 0 | 0 | 0 | 0 |
| 6334 | Pig | Central | 0 | 0 | 0 | 0 | 0 | 0 |
| 6335 | Pig | Central | 0 | 0 | 0 | 0 | 0 | 0 |

|      |     |         |   |   |   |   |   |   |
|------|-----|---------|---|---|---|---|---|---|
| 6336 | Pig | Central | 0 | 0 | 0 | 0 | 0 | 0 |
| 6337 | Pig | Central | 0 | 0 | 0 | 0 | 0 | 0 |
| 6338 | Pig | Central | 0 | 0 | 0 | 0 | 0 | 0 |
| 6339 | Pig | Central | 0 | 0 | 0 | 0 | 0 | 0 |
| 6340 | Pig | Central | 0 | 0 | 0 | 0 | 0 | 0 |
| 6341 | Pig | Central | 0 | 0 | 0 | 0 | 0 | 0 |
| 6342 | Pig | Central | 0 | 0 | 0 | 0 | 0 | 0 |
| 6343 | Pig | Central | 0 | 0 | 0 | 0 | 0 | 0 |
| 6344 | Pig | Central | 0 | 0 | 0 | 0 | 0 | 0 |
| 6345 | Pig | Central | 0 | 0 | 0 | 0 | 0 | 0 |
| 6346 | Pig | Central | 0 | 0 | 0 | 0 | 0 | 0 |
| 6347 | Pig | Central | 0 | 0 | 0 | 0 | 0 | 0 |
| 6348 | Pig | Central | 0 | 0 | 0 | 0 | 0 | 0 |
| 6349 | Pig | Central | 0 | 0 | 0 | 0 | 0 | 0 |
| 6350 | Pig | Central | 0 | 0 | 0 | 0 | 0 | 0 |
| 6351 | Pig | Central | 0 | 0 | 0 | 0 | 0 | 0 |
| 6352 | Pig | Central | 0 | 0 | 0 | 0 | 0 | 0 |
| 6353 | Pig | Central | 0 | 0 | 0 | 0 | 0 | 0 |
| 6354 | Pig | Central | 0 | 0 | 0 | 0 | 0 | 0 |
| 6355 | Pig | Central | 0 | 0 | 0 | 0 | 0 | 0 |
| 6356 | Pig | Central | 0 | 0 | 0 | 0 | 0 | 0 |
| 6357 | Pig | Central | 0 | 0 | 0 | 0 | 0 | 0 |
| 6358 | Pig | Central | 0 | 0 | 0 | 0 | 0 | 0 |
| 6359 | Pig | Central | 0 | 0 | 0 | 0 | 0 | 0 |
| 6360 | Pig | Central | 0 | 0 | 0 | 0 | 0 | 0 |
| 6361 | Pig | Central | 0 | 0 | 0 | 0 | 0 | 0 |
| 6362 | Pig | Central | 0 | 0 | 0 | 0 | 0 | 0 |
| 6363 | Pig | Central | 0 | 0 | 0 | 0 | 0 | 0 |
| 6364 | Pig | Central | 0 | 0 | 0 | 0 | 0 | 0 |
| 6365 | Pig | Central | 0 | 0 | 0 | 0 | 0 | 0 |
| 6366 | Pig | Central | 0 | 0 | 0 | 0 | 0 | 0 |
| 6367 | Pig | Central | 0 | 0 | 0 | 0 | 0 | 0 |
| 6368 | Pig | Central | 0 | 0 | 0 | 0 | 0 | 0 |
| 6369 | Pig | Central | 0 | 0 | 0 | 0 | 0 | 0 |
| 6370 | Pig | Central | 0 | 0 | 0 | 0 | 0 | 0 |
| 6371 | Pig | Central | 0 | 0 | 0 | 0 | 0 | 0 |
| 6372 | Pig | Central | 0 | 0 | 0 | 0 | 0 | 0 |
| 6373 | Pig | Central | 0 | 0 | 0 | 0 | 0 | 0 |
| 6374 | Pig | Central | 0 | 0 | 0 | 0 | 0 | 0 |
| 6375 | Pig | Central | 0 | 0 | 0 | 0 | 0 | 0 |
| 6376 | Pig | Central | 0 | 0 | 0 | 0 | 0 | 0 |
| 6377 | Pig | Central | 0 | 0 | 0 | 0 | 0 | 0 |
| 6378 | Pig | Central | 0 | 0 | 0 | 0 | 0 | 0 |
| 6379 | Pig | Central | 0 | 0 | 0 | 0 | 0 | 0 |
| 6380 | Pig | Central | 0 | 0 | 0 | 0 | 0 | 0 |
| 6381 | Pig | Central | 0 | 0 | 0 | 0 | 0 | 0 |
| 6382 | Pig | Central | 0 | 0 | 0 | 0 | 0 | 0 |
| 6383 | Pig | Central | 0 | 0 | 0 | 0 | 0 | 0 |

|      |     |         |   |   |   |   |   |   |
|------|-----|---------|---|---|---|---|---|---|
| 6384 | Pig | Central | 0 | 0 | 0 | 0 | 0 | 0 |
| 6385 | Pig | Central | 0 | 0 | 0 | 0 | 0 | 0 |
| 6386 | Pig | Central | 0 | 0 | 0 | 0 | 0 | 0 |
| 6387 | Pig | Central | 0 | 0 | 0 | 0 | 0 | 0 |
| 6388 | Pig | Central | 0 | 0 | 0 | 0 | 0 | 0 |
| 6389 | Pig | Central | 0 | 0 | 0 | 0 | 0 | 0 |
| 6390 | Pig | Central | 0 | 0 | 0 | 0 | 0 | 0 |
| 6391 | Pig | Central | 0 | 0 | 0 | 0 | 0 | 0 |
| 6392 | Pig | Central | 0 | 0 | 0 | 0 | 0 | 0 |
| 6393 | Pig | Central | 0 | 0 | 0 | 0 | 0 | 0 |
| 6394 | Pig | Central | 0 | 0 | 0 | 0 | 0 | 0 |
| 6395 | Pig | Central | 0 | 0 | 0 | 0 | 0 | 0 |
| 6396 | Pig | Central | 0 | 0 | 0 | 0 | 0 | 0 |
| 6397 | Pig | Central | 0 | 0 | 0 | 0 | 0 | 0 |
| 6398 | Pig | Central | 0 | 0 | 0 | 0 | 0 | 0 |
| 6399 | Pig | Central | 0 | 0 | 0 | 0 | 0 | 0 |
| 6400 | Pig | Central | 0 | 0 | 0 | 0 | 0 | 0 |
| 6401 | Pig | Central | 0 | 0 | 0 | 0 | 0 | 0 |
| 6402 | Pig | Central | 0 | 0 | 0 | 0 | 0 | 0 |
| 6403 | Pig | Central | 0 | 0 | 0 | 0 | 0 | 0 |
| 6404 | Pig | Central | 0 | 0 | 0 | 0 | 0 | 0 |
| 6405 | Pig | Central | 0 | 0 | 0 | 0 | 0 | 0 |
| 6406 | Pig | Central | 0 | 0 | 0 | 0 | 0 | 0 |
| 6407 | Pig | Central | 0 | 0 | 0 | 0 | 0 | 0 |
| 6408 | Pig | Central | 0 | 0 | 0 | 0 | 0 | 0 |
| 6409 | Pig | Central | 0 | 0 | 0 | 0 | 0 | 0 |
| 6410 | Pig | Central | 0 | 0 | 0 | 1 | 0 | 1 |
| 6411 | Pig | Central | 0 | 0 | 0 | 0 | 0 | 0 |
| 6412 | Pig | Central | 0 | 0 | 0 | 0 | 0 | 0 |
| 6413 | Pig | Central | 0 | 0 | 0 | 0 | 0 | 0 |
| 6414 | Pig | Central | 0 | 0 | 0 | 1 | 0 | 1 |
| 6415 | Pig | Central | 0 | 0 | 0 | 0 | 0 | 0 |
| 6416 | Pig | Central | 0 | 0 | 0 | 0 | 0 | 0 |
| 6417 | Pig | Central | 0 | 0 | 0 | 0 | 0 | 0 |
| 6418 | Pig | Central | 0 | 0 | 0 | 0 | 0 | 0 |
| 6419 | Pig | Central | 0 | 0 | 0 | 1 | 0 | 1 |
| 6420 | Pig | Central | 0 | 0 | 0 | 0 | 0 | 0 |
| 6421 | Pig | Central | 0 | 0 | 0 | 0 | 0 | 0 |
| 6422 | Pig | Central | 0 | 0 | 0 | 1 | 0 | 1 |
| 6423 | Pig | Central | 0 | 0 | 0 | 0 | 0 | 0 |
| 6424 | Pig | Central | 0 | 0 | 0 | 1 | 0 | 1 |
| 6425 | Pig | Central | 0 | 0 | 0 | 0 | 0 | 0 |
| 6426 | Pig | Central | 0 | 0 | 0 | 0 | 0 | 0 |
| 6427 | Pig | Central | 0 | 0 | 0 | 0 | 0 | 0 |
| 6428 | Pig | Central | 0 | 0 | 0 | 0 | 0 | 0 |
| 6429 | Pig | Central | 0 | 0 | 0 | 0 | 0 | 0 |
| 6430 | Pig | Central | 0 | 0 | 0 | 0 | 0 | 0 |
| 6431 | Pig | Central | 0 | 0 | 0 | 0 | 0 | 0 |

|      |     |         |   |   |   |   |   |   |
|------|-----|---------|---|---|---|---|---|---|
| 6432 | Pig | Central | 0 | 0 | 0 | 0 | 0 | 0 |
| 6433 | Pig | Central | 0 | 0 | 0 | 0 | 0 | 0 |
| 6434 | Pig | Central | 0 | 0 | 0 | 0 | 0 | 0 |
| 6435 | Pig | Central | 0 | 0 | 0 | 0 | 0 | 0 |
| 6436 | Pig | Central | 0 | 0 | 0 | 0 | 0 | 0 |
| 6437 | Pig | Central | 0 | 0 | 0 | 0 | 0 | 0 |
| 6438 | Pig | Central | 0 | 0 | 0 | 0 | 0 | 0 |
| 6439 | Pig | Central | 0 | 0 | 0 | 0 | 0 | 0 |
| 6440 | Pig | Central | 0 | 0 | 0 | 0 | 0 | 0 |
| 6441 | Pig | Central | 0 | 0 | 0 | 0 | 0 | 0 |
| 6442 | Pig | Central | 0 | 0 | 0 | 0 | 0 | 0 |
| 6443 | Pig | Central | 0 | 0 | 0 | 0 | 0 | 0 |
| 6444 | Pig | Central | 0 | 0 | 0 | 0 | 0 | 0 |
| 6445 | Pig | Central | 0 | 0 | 0 | 0 | 0 | 0 |
| 6446 | Pig | Central | 0 | 0 | 0 | 0 | 0 | 0 |
| 6447 | Pig | Central | 0 | 0 | 0 | 0 | 0 | 0 |
| 6448 | Pig | Central | 0 | 0 | 0 | 0 | 0 | 0 |
| 6449 | Pig | Central | 0 | 0 | 0 | 0 | 0 | 0 |
| 6450 | Pig | Central | 0 | 0 | 0 | 0 | 0 | 0 |
| 6451 | Pig | Central | 0 | 0 | 0 | 0 | 0 | 0 |
| 6452 | Pig | Central | 0 | 0 | 0 | 0 | 0 | 0 |
| 6453 | Pig | Central | 0 | 0 | 0 | 0 | 0 | 0 |
| 6454 | Pig | Central | 0 | 0 | 0 | 0 | 0 | 0 |
| 6455 | Pig | Central | 0 | 0 | 0 | 0 | 0 | 0 |
| 6456 | Pig | Central | 0 | 0 | 0 | 0 | 0 | 0 |
| 6457 | Pig | Central | 0 | 0 | 0 | 0 | 0 | 0 |
| 6458 | Pig | Central | 0 | 0 | 0 | 0 | 0 | 0 |
| 6459 | Pig | Central | 0 | 0 | 0 | 0 | 0 | 0 |
| 6460 | Pig | Central | 0 | 0 | 0 | 0 | 0 | 0 |
| 6461 | Pig | Central | 0 | 0 | 0 | 0 | 0 | 0 |
| 6462 | Pig | Central | 0 | 0 | 0 | 0 | 0 | 0 |
| 6463 | Pig | Central | 0 | 0 | 0 | 0 | 0 | 0 |
| 6464 | Pig | Central | 0 | 0 | 0 | 0 | 0 | 0 |
| 6465 | Pig | Central | 0 | 0 | 0 | 0 | 0 | 0 |
| 6466 | Pig | Central | 0 | 0 | 0 | 0 | 0 | 0 |
| 6467 | Pig | Central | 0 | 0 | 0 | 0 | 0 | 0 |
| 6468 | Pig | Central | 0 | 0 | 0 | 0 | 0 | 0 |
| 6469 | Pig | Central | 0 | 0 | 0 | 0 | 0 | 0 |
| 6470 | Pig | Central | 0 | 0 | 0 | 0 | 0 | 0 |
| 6471 | Pig | Central | 0 | 0 | 0 | 0 | 0 | 0 |
| 6472 | Pig | Central | 0 | 0 | 0 | 0 | 0 | 0 |
| 6473 | Pig | Central | 0 | 0 | 0 | 0 | 0 | 0 |
| 6474 | Pig | Central | 0 | 0 | 0 | 0 | 0 | 0 |
| 6475 | Pig | Central | 0 | 0 | 0 | 0 | 0 | 0 |
| 6476 | Pig | Central | 0 | 0 | 0 | 0 | 0 | 0 |
| 6477 | Pig | Central | 0 | 0 | 0 | 0 | 0 | 0 |
| 6478 | Pig | Central | 0 | 0 | 0 | 0 | 0 | 0 |
| 6479 | Pig | Central | 0 | 0 | 0 | 0 | 0 | 0 |

|      |     |         |   |   |   |   |   |   |
|------|-----|---------|---|---|---|---|---|---|
| 6480 | Pig | Central | 0 | 0 | 0 | 0 | 0 | 0 |
| 6481 | Pig | Central | 0 | 0 | 0 | 0 | 0 | 0 |
| 6482 | Pig | Central | 0 | 0 | 0 | 0 | 0 | 0 |
| 6483 | Pig | Central | 0 | 0 | 0 | 0 | 0 | 0 |
| 6484 | Pig | Central | 0 | 0 | 0 | 0 | 0 | 0 |
| 6485 | Pig | Central | 0 | 0 | 0 | 0 | 0 | 0 |
| 6486 | Pig | Central | 0 | 0 | 0 | 0 | 0 | 0 |
| 6487 | Pig | Central | 0 | 0 | 0 | 0 | 0 | 0 |
| 6488 | Pig | Central | 0 | 0 | 0 | 0 | 0 | 0 |
| 6489 | Pig | Central | 0 | 0 | 0 | 0 | 0 | 0 |
| 6490 | Pig | Central | 0 | 0 | 0 | 0 | 0 | 0 |
| 6491 | Pig | Central | 0 | 0 | 0 | 0 | 0 | 0 |
| 6492 | Pig | Central | 0 | 0 | 0 | 0 | 0 | 0 |
| 6493 | Pig | Central | 0 | 0 | 0 | 0 | 0 | 0 |
| 6494 | Pig | Eastern | 0 | 0 | 0 | 0 | 0 | 0 |
| 6495 | Pig | Eastern | 0 | 0 | 0 | 0 | 0 | 0 |
| 6496 | Pig | Eastern | 0 | 0 | 0 | 0 | 0 | 0 |
| 6497 | Pig | Eastern | 0 | 0 | 0 | 0 | 0 | 0 |
| 6498 | Pig | Eastern | 0 | 0 | 0 | 0 | 0 | 0 |
| 6499 | Pig | Eastern | 0 | 0 | 0 | 0 | 0 | 0 |
| 6500 | Pig | Eastern | 0 | 0 | 0 | 0 | 0 | 0 |
| 6501 | Pig | Eastern | 0 | 0 | 0 | 0 | 0 | 0 |
| 6502 | Pig | Eastern | 0 | 0 | 0 | 0 | 0 | 0 |
| 6503 | Pig | Eastern | 0 | 0 | 0 | 0 | 0 | 0 |
| 6504 | Pig | Eastern | 0 | 0 | 0 | 0 | 0 | 0 |
| 6505 | Pig | Eastern | 0 | 0 | 0 | 0 | 0 | 0 |
| 6506 | Pig | Eastern | 0 | 0 | 0 | 0 | 0 | 0 |
| 6507 | Pig | Eastern | 0 | 0 | 0 | 0 | 0 | 0 |
| 6508 | Pig | Eastern | 0 | 0 | 0 | 0 | 0 | 0 |
| 6509 | Pig | Eastern | 0 | 0 | 0 | 0 | 0 | 0 |
| 6510 | Pig | Eastern | 0 | 0 | 0 | 0 | 0 | 0 |
| 6511 | Pig | Eastern | 0 | 0 | 0 | 0 | 0 | 0 |
| 6512 | Pig | Eastern | 0 | 0 | 0 | 0 | 0 | 0 |
| 6513 | Pig | Eastern | 0 | 0 | 0 | 0 | 0 | 0 |
| 6514 | Pig | Central | 0 | 0 | 0 | 0 | 0 | 0 |
| 6515 | Pig | Central | 0 | 0 | 0 | 0 | 0 | 0 |
| 6516 | Pig | Central | 0 | 0 | 0 | 1 | 0 | 1 |
| 6517 | Pig | Central | 0 | 0 | 0 | 0 | 0 | 0 |
| 6518 | Pig | Central | 0 | 0 | 0 | 0 | 0 | 0 |
| 6519 | Pig | Central | 0 | 0 | 0 | 0 | 0 | 0 |
| 6520 | Pig | Central | 0 | 0 | 0 | 0 | 0 | 0 |
| 6521 | Pig | Central | 0 | 0 | 0 | 1 | 0 | 1 |
| 6522 | Pig | Central | 0 | 0 | 0 | 0 | 0 | 0 |
| 6523 | Pig | Central | 0 | 0 | 0 | 0 | 0 | 0 |
| 6524 | Pig | Central | 0 | 0 | 0 | 0 | 0 | 0 |
| 6525 | Pig | Central | 0 | 0 | 0 | 0 | 0 | 0 |
| 6526 | Pig | Central | 0 | 0 | 0 | 0 | 0 | 0 |
| 6527 | Pig | Central | 0 | 0 | 0 | 0 | 0 | 0 |



|      |     |         |   |   |   |   |   |   |
|------|-----|---------|---|---|---|---|---|---|
| 6528 | Pig | Central | 0 | 0 | 0 | 0 | 0 | 0 |
| 6529 | Pig | Central | 0 | 0 | 0 | 1 | 0 | 1 |
| 6530 | Pig | Central | 0 | 0 | 0 | 0 | 0 | 0 |
| 6531 | Pig | Central | 0 | 0 | 0 | 0 | 0 | 0 |
| 6532 | Pig | Central | 0 | 0 | 0 | 0 | 0 | 0 |
| 6533 | Pig | Central | 0 | 0 | 0 | 0 | 0 | 0 |
| 6534 | Pig | Central | 0 | 0 | 0 | 0 | 0 | 0 |
| 6535 | Pig | Central | 0 | 0 | 0 | 0 | 0 | 0 |
| 6536 | Pig | Central | 0 | 0 | 0 | 0 | 0 | 0 |
| 6537 | Pig | Central | 0 | 0 | 0 | 0 | 0 | 0 |
| 6538 | Pig | Central | 0 | 0 | 0 | 0 | 0 | 0 |
| 6539 | Pig | Central | 0 | 0 | 0 | 0 | 0 | 0 |
| 6540 | Pig | Central | 0 | 0 | 0 | 0 | 0 | 0 |
| 6541 | Pig | Central | 0 | 0 | 0 | 0 | 0 | 0 |
| 6542 | Pig | Central | 0 | 0 | 0 | 0 | 0 | 0 |
| 6543 | Pig | Central | 0 | 0 | 0 | 0 | 0 | 0 |
| 6544 | Pig | Central | 0 | 0 | 0 | 1 | 0 | 1 |
| 6545 | Pig | Central | 0 | 0 | 0 | 0 | 0 | 0 |
| 6546 | Pig | Central | 0 | 0 | 0 | 0 | 0 | 0 |
| 6547 | Pig | Central | 0 | 0 | 0 | 1 | 0 | 1 |
| 6548 | Pig | Central | 0 | 0 | 0 | 0 | 0 | 0 |
| 6549 | Pig | Central | 0 | 0 | 0 | 0 | 0 | 0 |
| 6550 | Pig | Central | 0 | 0 | 0 | 0 | 0 | 0 |
| 6551 | Pig | Central | 0 | 0 | 0 | 0 | 0 | 0 |
| 6552 | Pig | Central | 0 | 0 | 0 | 0 | 0 | 0 |
| 6553 | Pig | Central | 0 | 0 | 0 | 0 | 0 | 0 |
| 6554 | Pig | Central | 0 | 0 | 0 | 0 | 0 | 0 |
| 6555 | Pig | Central | 0 | 0 | 0 | 1 | 0 | 1 |
| 6556 | Pig | Central | 0 | 0 | 0 | 1 | 0 | 1 |
| 6557 | Pig | Central | 0 | 0 | 0 | 0 | 0 | 0 |
| 6558 | Pig | Central | 0 | 0 | 0 | 1 | 0 | 1 |
| 6559 | Pig | Central | 0 | 0 | 0 | 0 | 0 | 0 |
| 6560 | Pig | Central | 0 | 0 | 0 | 0 | 0 | 0 |
| 6561 | Pig | Central | 0 | 0 | 0 | 0 | 0 | 0 |
| 6562 | Pig | Central | 0 | 0 | 0 | 0 | 0 | 0 |
| 6563 | Pig | Central | 0 | 0 | 0 | 0 | 0 | 0 |
| 6564 | Pig | Central | 0 | 0 | 0 | 0 | 0 | 0 |
| 6565 | Pig | Central | 0 | 0 | 0 | 1 | 0 | 1 |
| 6566 | Pig | Central | 0 | 0 | 0 | 1 | 0 | 1 |
| 6567 | Pig | Central | 0 | 0 | 0 | 1 | 0 | 1 |
| 6568 | Pig | Central | 0 | 0 | 0 | 1 | 0 | 1 |
| 6569 | Pig | Central | 0 | 0 | 0 | 0 | 0 | 0 |
| 6570 | Pig | Central | 0 | 0 | 0 | 0 | 0 | 0 |
| 6571 | Pig | Central | 0 | 0 | 0 | 0 | 0 | 0 |
| 6572 | Pig | Central | 0 | 0 | 0 | 0 | 0 | 0 |
| 6573 | Pig | Central | 0 | 0 | 0 | 0 | 0 | 0 |
| 6574 | Pig | Central | 0 | 0 | 0 | 0 | 0 | 0 |
| 6575 | Pig | Central | 0 | 0 | 0 | 0 | 0 | 0 |

|      |     |         |   |   |   |   |   |   |
|------|-----|---------|---|---|---|---|---|---|
| 6576 | Pig | Central | 0 | 0 | 0 | 0 | 0 | 0 |
| 6577 | Pig | Central | 0 | 0 | 0 | 0 | 0 | 0 |
| 6578 | Pig | Central | 0 | 0 | 0 | 0 | 0 | 0 |
| 6579 | Pig | Central | 0 | 0 | 0 | 1 | 0 | 1 |
| 6580 | Pig | Central | 0 | 0 | 0 | 1 | 0 | 1 |
| 6581 | Pig | Central | 0 | 0 | 0 | 1 | 0 | 1 |
| 6582 | Pig | Central | 0 | 0 | 0 | 0 | 0 | 0 |
| 6583 | Pig | Central | 0 | 0 | 0 | 1 | 0 | 1 |
| 6584 | Pig | Central | 0 | 0 | 0 | 1 | 0 | 1 |
| 6585 | Pig | Central | 0 | 0 | 0 | 0 | 0 | 0 |
| 6586 | Pig | Central | 0 | 0 | 0 | 1 | 0 | 1 |
| 6587 | Pig | Central | 0 | 0 | 0 | 1 | 0 | 1 |
| 6588 | Pig | Central | 0 | 0 | 0 | 1 | 0 | 1 |
| 6589 | Pig | Central | 0 | 0 | 0 | 1 | 0 | 1 |
| 6590 | Pig | Central | 0 | 0 | 0 | 0 | 0 | 0 |
| 6591 | Pig | Central | 0 | 0 | 0 | 0 | 0 | 0 |
| 6592 | Pig | Central | 0 | 0 | 0 | 1 | 0 | 1 |
| 6593 | Pig | Central | 0 | 0 | 0 | 0 | 0 | 0 |
| 6594 | Pig | Central | 0 | 0 | 0 | 0 | 0 | 0 |
| 6595 | Pig | Central | 0 | 0 | 0 | 0 | 0 | 0 |
| 6596 | Pig | Central | 0 | 0 | 0 | 0 | 0 | 0 |
| 6597 | Pig | Central | 0 | 0 | 0 | 0 | 0 | 0 |
| 6598 | Pig | Central | 0 | 0 | 0 | 0 | 0 | 0 |
| 6599 | Pig | Central | 0 | 0 | 0 | 0 | 0 | 0 |
| 6600 | Pig | Central | 0 | 0 | 0 | 0 | 0 | 0 |
| 6601 | Pig | Central | 0 | 0 | 0 | 0 | 0 | 0 |
| 6602 | Pig | Central | 0 | 0 | 0 | 0 | 0 | 0 |
| 6603 | Pig | Central | 0 | 0 | 0 | 0 | 0 | 0 |
| 6604 | Pig | Central | 0 | 0 | 0 | 0 | 0 | 0 |
| 6605 | Pig | Central | 0 | 0 | 0 | 0 | 0 | 0 |
| 6606 | Pig | Central | 0 | 0 | 0 | 0 | 0 | 0 |
| 6607 | Pig | Central | 0 | 0 | 0 | 0 | 0 | 0 |
| 6608 | Pig | Central | 0 | 0 | 0 | 0 | 0 | 0 |
| 6609 | Pig | Central | 0 | 0 | 0 | 0 | 0 | 0 |
| 6610 | Pig | Central | 0 | 0 | 0 | 0 | 0 | 0 |
| 6611 | Pig | Central | 0 | 0 | 0 | 0 | 0 | 0 |
| 6612 | Pig | Central | 0 | 0 | 0 | 0 | 0 | 0 |
| 6613 | Pig | Central | 0 | 0 | 0 | 0 | 0 | 0 |
| 6614 | Pig | Central | 0 | 0 | 0 | 1 | 0 | 1 |
| 6615 | Pig | Central | 0 | 0 | 0 | 0 | 0 | 0 |
| 6616 | Pig | Central | 0 | 0 | 0 | 0 | 0 | 0 |
| 6617 | Pig | Central | 0 | 0 | 0 | 0 | 0 | 0 |
| 6618 | Pig | Central | 0 | 0 | 0 | 0 | 0 | 0 |
| 6619 | Pig | Central | 0 | 0 | 0 | 0 | 0 | 0 |
| 6620 | Pig | Central | 0 | 0 | 0 | 0 | 0 | 0 |
| 6621 | Pig | Central | 0 | 0 | 0 | 0 | 0 | 0 |
| 6622 | Pig | Central | 0 | 0 | 0 | 0 | 0 | 0 |
| 6623 | Pig | Central | 0 | 0 | 0 | 0 | 0 | 0 |

|      |     |         |   |   |   |   |   |   |
|------|-----|---------|---|---|---|---|---|---|
| 6624 | Pig | Central | 0 | 0 | 0 | 0 | 0 | 0 |
| 6625 | Pig | Central | 0 | 0 | 0 | 0 | 0 | 0 |
| 6626 | Pig | Central | 0 | 0 | 0 | 0 | 0 | 0 |
| 6627 | Pig | Central | 0 | 0 | 0 | 0 | 0 | 0 |
| 6628 | Pig | Central | 0 | 0 | 0 | 0 | 0 | 0 |
| 6629 | Pig | Central | 0 | 0 | 0 | 0 | 0 | 0 |
| 6630 | Pig | Central | 0 | 0 | 0 | 0 | 0 | 0 |
| 6631 | Pig | Central | 0 | 0 | 0 | 0 | 0 | 0 |
| 6632 | Pig | Central | 0 | 0 | 0 | 0 | 0 | 0 |
| 6633 | Pig | Central | 0 | 0 | 0 | 0 | 0 | 0 |
| 6634 | Pig | Central | 0 | 0 | 0 | 1 | 0 | 1 |
| 6635 | Pig | Central | 0 | 0 | 0 | 0 | 0 | 0 |
| 6636 | Pig | Central | 0 | 0 | 0 | 1 | 0 | 1 |
| 6637 | Pig | Central | 0 | 0 | 0 | 0 | 0 | 0 |
| 6638 | Pig | Central | 0 | 0 | 0 | 1 | 0 | 1 |
| 6639 | Pig | Central | 0 | 0 | 0 | 1 | 0 | 1 |
| 6640 | Pig | Central | 0 | 0 | 0 | 1 | 0 | 1 |
| 6641 | Pig | Central | 0 | 0 | 0 | 0 | 0 | 0 |
| 6642 | Pig | Central | 0 | 0 | 0 | 0 | 0 | 0 |
| 6643 | Pig | Central | 0 | 0 | 0 | 1 | 0 | 1 |
| 6644 | Pig | Central | 0 | 0 | 0 | 0 | 0 | 0 |
| 6645 | Pig | Central | 0 | 0 | 0 | 0 | 0 | 0 |
| 6646 | Pig | Central | 0 | 0 | 0 | 0 | 0 | 0 |
| 6647 | Pig | Central | 0 | 0 | 0 | 0 | 0 | 0 |
| 6648 | Pig | Central | 0 | 0 | 0 | 0 | 0 | 0 |
| 6649 | Pig | Central | 0 | 0 | 0 | 0 | 0 | 0 |
| 6650 | Pig | Central | 0 | 0 | 0 | 0 | 0 | 0 |
| 6651 | Pig | Central | 0 | 0 | 0 | 0 | 0 | 0 |
| 6652 | Pig | Central | 0 | 0 | 0 | 0 | 0 | 0 |
| 6653 | Pig | Central | 0 | 0 | 0 | 0 | 0 | 0 |
| 6654 | Pig | Central | 0 | 0 | 0 | 0 | 0 | 0 |
| 6655 | Pig | Central | 0 | 0 | 0 | 0 | 0 | 0 |
| 6656 | Pig | Central | 0 | 0 | 0 | 0 | 0 | 0 |
| 6657 | Pig | Central | 0 | 0 | 0 | 0 | 0 | 0 |
| 6658 | Pig | Central | 0 | 0 | 0 | 0 | 0 | 0 |
| 6659 | Pig | Central | 0 | 0 | 0 | 0 | 0 | 0 |
| 6660 | Pig | Central | 0 | 0 | 0 | 0 | 0 | 0 |
| 6661 | Pig | Central | 0 | 0 | 0 | 0 | 0 | 0 |
| 6662 | Pig | Central | 0 | 0 | 0 | 0 | 0 | 0 |
| 6663 | Pig | Central | 0 | 0 | 0 | 0 | 0 | 0 |
| 6664 | Pig | Central | 0 | 0 | 0 | 0 | 0 | 0 |
| 6665 | Pig | Central | 0 | 0 | 0 | 0 | 0 | 0 |
| 6666 | Pig | Central | 0 | 0 | 0 | 0 | 0 | 0 |
| 6667 | Pig | Central | 0 | 0 | 0 | 0 | 0 | 0 |
| 6668 | Pig | Central | 0 | 0 | 0 | 0 | 0 | 0 |
| 6669 | Pig | Central | 0 | 0 | 0 | 0 | 0 | 0 |
| 6670 | Pig | Central | 0 | 0 | 0 | 0 | 0 | 0 |
| 6671 | Pig | Central | 0 | 0 | 0 | 0 | 0 | 0 |

|      |     |         |   |   |   |   |   |   |
|------|-----|---------|---|---|---|---|---|---|
| 6672 | Pig | Central | 0 | 0 | 0 | 0 | 0 | 0 |
| 6673 | Pig | Central | 0 | 0 | 0 | 0 | 0 | 0 |
| 6674 | Pig | Central | 0 | 0 | 0 | 0 | 0 | 0 |
| 6675 | Pig | Central | 0 | 0 | 0 | 0 | 0 | 0 |
| 6676 | Pig | Central | 0 | 0 | 0 | 0 | 0 | 0 |
| 6677 | Pig | Central | 0 | 0 | 0 | 0 | 0 | 0 |
| 6678 | Pig | Central | 0 | 0 | 0 | 0 | 0 | 0 |
| 6679 | Pig | Central | 0 | 0 | 0 | 0 | 0 | 0 |
| 6680 | Pig | Central | 0 | 0 | 0 | 0 | 0 | 0 |
| 6681 | Pig | Central | 0 | 0 | 0 | 0 | 0 | 0 |
| 6682 | Pig | Central | 0 | 0 | 0 | 0 | 0 | 0 |
| 6683 | Pig | Central | 0 | 0 | 0 | 0 | 0 | 0 |
| 6684 | Pig | Central | 0 | 0 | 0 | 0 | 0 | 0 |
| 6685 | Pig | Central | 0 | 0 | 0 | 0 | 0 | 0 |
| 6686 | Pig | Central | 0 | 0 | 0 | 0 | 0 | 0 |
| 6687 | Pig | Central | 0 | 0 | 0 | 0 | 0 | 0 |
| 6688 | Pig | Central | 0 | 0 | 0 | 0 | 0 | 0 |
| 6689 | Pig | Central | 0 | 0 | 0 | 0 | 0 | 0 |
| 6690 | Pig | Central | 0 | 0 | 0 | 0 | 0 | 0 |
| 6691 | Pig | Central | 0 | 0 | 0 | 0 | 0 | 0 |
| 6692 | Pig | Central | 0 | 0 | 0 | 0 | 0 | 0 |
| 6693 | Pig | Central | 0 | 0 | 0 | 0 | 0 | 0 |
| 6694 | Pig | Central | 0 | 0 | 0 | 0 | 0 | 0 |
| 6695 | Pig | Central | 0 | 0 | 0 | 0 | 0 | 0 |
| 6696 | Pig | Central | 0 | 0 | 0 | 1 | 0 | 1 |
| 6697 | Pig | Central | 0 | 0 | 0 | 1 | 0 | 1 |
| 6698 | Pig | Central | 0 | 0 | 0 | 0 | 0 | 0 |
| 6699 | Pig | Central | 0 | 0 | 0 | 0 | 0 | 0 |
| 6700 | Pig | Central | 0 | 0 | 0 | 0 | 0 | 0 |
| 6701 | Pig | Central | 0 | 0 | 0 | 0 | 0 | 0 |
| 6702 | Pig | Central | 0 | 0 | 0 | 0 | 0 | 0 |
| 6703 | Pig | Central | 0 | 0 | 0 | 0 | 0 | 0 |
| 6704 | Pig | Central | 0 | 0 | 0 | 0 | 0 | 0 |
| 6705 | Pig | Central | 0 | 0 | 0 | 0 | 0 | 0 |
| 6706 | Pig | Central | 0 | 0 | 0 | 0 | 0 | 0 |
| 6707 | Pig | Central | 0 | 0 | 0 | 0 | 0 | 0 |
| 6708 | Pig | Central | 0 | 0 | 0 | 0 | 0 | 0 |
| 6709 | Pig | Central | 0 | 0 | 0 | 0 | 0 | 0 |
| 6710 | Pig | Central | 0 | 0 | 0 | 0 | 0 | 0 |
| 6711 | Pig | Central | 0 | 0 | 0 | 0 | 0 | 0 |
| 6712 | Pig | Central | 0 | 0 | 0 | 1 | 0 | 1 |
| 6713 | Pig | Central | 0 | 0 | 0 | 0 | 0 | 0 |
| 6714 | Pig | Central | 0 | 0 | 0 | 0 | 0 | 0 |
| 6715 | Pig | Central | 0 | 0 | 0 | 0 | 0 | 0 |
| 6716 | Pig | Central | 0 | 0 | 0 | 0 | 0 | 0 |
| 6717 | Pig | Central | 0 | 0 | 0 | 0 | 0 | 0 |
| 6718 | Pig | Central | 0 | 0 | 0 | 0 | 0 | 0 |
| 6719 | Pig | Central | 0 | 0 | 0 | 0 | 0 | 0 |

|      |     |              |   |   |   |   |   |   |
|------|-----|--------------|---|---|---|---|---|---|
| 6720 | Pig | Central      | 0 | 0 | 0 | 0 | 0 | 0 |
| 6721 | Pig | Central      | 0 | 0 | 0 | 0 | 0 | 0 |
| 6722 | Pig | Central      | 0 | 0 | 0 | 0 | 0 | 0 |
| 6723 | Pig | Central      | 0 | 0 | 0 | 0 | 0 | 0 |
| 6724 | Pig | Central      | 0 | 0 | 0 | 0 | 0 | 0 |
| 6725 | Pig | Central      | 0 | 0 | 0 | 0 | 0 | 0 |
| 6726 | Pig | Central      | 0 | 0 | 0 | 0 | 0 | 0 |
| 6727 | Pig | Central      | 0 | 0 | 0 | 0 | 0 | 0 |
| 6728 | Pig | Central      | 0 | 0 | 0 | 1 | 0 | 1 |
| 6729 | Pig | Central      | 0 | 0 | 0 | 0 | 0 | 0 |
| 6730 | Pig | Central      | 0 | 0 | 0 | 0 | 0 | 0 |
| 6731 | Pig | Central      | 0 | 0 | 0 | 1 | 0 | 1 |
| 6732 | Pig | Central      | 0 | 0 | 1 | 1 | 0 | 1 |
| 6733 | Pig | Central      | 0 | 0 | 0 | 0 | 0 | 0 |
| 6734 | Pig | Central      | 0 | 0 | 0 | 0 | 0 | 0 |
| 6735 | Pig | Central      | 0 | 0 | 0 | 1 | 0 | 1 |
| 6736 | Pig | Central      | 0 | 0 | 0 | 0 | 0 | 0 |
| 6737 | Pig | Central      | 0 | 0 | 0 | 0 | 0 | 0 |
| 6738 | Pig | Central      | 0 | 0 | 0 | 1 | 0 | 1 |
| 6739 | Pig | Central      | 0 | 0 | 0 | 1 | 0 | 1 |
| 6740 | Pig | Central      | 0 | 0 | 0 | 0 | 0 | 0 |
| 6741 | Pig | Central      | 0 | 0 | 0 | 0 | 0 | 0 |
| 6742 | Pig | Central      | 0 | 0 | 0 | 0 | 0 | 0 |
| 6743 | Pig | Central      | 0 | 0 | 0 | 0 | 0 | 0 |
| 6744 | Pig | Central      | 0 | 0 | 0 | 0 | 0 | 0 |
| 6745 | Pig | Central      | 0 | 0 | 0 | 0 | 0 | 0 |
| 6746 | Pig | Central      | 0 | 0 | 0 | 0 | 0 | 0 |
| 6747 | Pig | Central      | 0 | 0 | 0 | 0 | 0 | 0 |
| 6748 | Pig | Central      | 0 | 0 | 0 | 1 | 0 | 1 |
| 6749 | Pig | Central      | 0 | 0 | 0 | 0 | 0 | 0 |
| 6750 | Pig | Central      | 0 | 0 | 0 | 0 | 0 | 0 |
| 6751 | Pig | Central      | 0 | 0 | 0 | 1 | 0 | 1 |
| 6752 | Pig | Central      | 0 | 0 | 0 | 0 | 0 | 0 |
| 6753 | Pig | Northeastern | 0 | 0 | 0 | 0 | 0 | 0 |
| 6754 | Pig | Northeastern | 0 | 0 | 0 | 0 | 0 | 0 |
| 6755 | Pig | Northeastern | 0 | 0 | 0 | 0 | 0 | 0 |
| 6756 | Pig | Northeastern | 0 | 0 | 0 | 0 | 0 | 0 |
| 6757 | Pig | Northeastern | 0 | 0 | 0 | 0 | 0 | 0 |
| 6758 | Pig | Northeastern | 0 | 0 | 0 | 0 | 0 | 0 |
| 6759 | Pig | Northeastern | 0 | 0 | 0 | 0 | 0 | 0 |
| 6760 | Pig | Northeastern | 0 | 0 | 0 | 0 | 0 | 0 |
| 6761 | Pig | Northeastern | 0 | 0 | 0 | 0 | 0 | 0 |
| 6762 | Pig | Northeastern | 0 | 0 | 0 | 0 | 0 | 0 |
| 6763 | Pig | Northeastern | 0 | 0 | 0 | 0 | 0 | 0 |
| 6764 | Pig | Northeastern | 0 | 0 | 0 | 0 | 0 | 0 |
| 6765 | Pig | Northeastern | 0 | 0 | 0 | 0 | 0 | 0 |
| 6766 | Pig | Northeastern | 0 | 0 | 0 | 0 | 0 | 0 |
| 6767 | Pig | Northeastern | 0 | 0 | 0 | 0 | 0 | 0 |

|      |     |              |   |   |   |   |   |   |
|------|-----|--------------|---|---|---|---|---|---|
| 6768 | Pig | Northeastern | 0 | 0 | 0 | 1 | 0 | 1 |
| 6769 | Pig | Northeastern | 0 | 0 | 0 | 0 | 0 | 0 |
| 6770 | Pig | Northeastern | 0 | 0 | 0 | 0 | 0 | 0 |
| 6771 | Pig | Northeastern | 0 | 0 | 0 | 0 | 0 | 0 |
| 6772 | Pig | Northeastern | 0 | 0 | 0 | 0 | 0 | 0 |
| 6773 | Pig | Northeastern | 0 | 0 | 0 | 0 | 0 | 0 |
| 6774 | Pig | Northeastern | 0 | 0 | 0 | 0 | 0 | 0 |
| 6775 | Pig | Northeastern | 0 | 0 | 0 | 0 | 0 | 0 |
| 6776 | Pig | Northeastern | 0 | 0 | 0 | 0 | 0 | 0 |
| 6777 | Pig | Northeastern | 0 | 0 | 0 | 0 | 0 | 0 |
| 6778 | Pig | Northeastern | 0 | 0 | 0 | 0 | 0 | 0 |
| 6779 | Pig | Northeastern | 0 | 0 | 0 | 0 | 0 | 0 |
| 6780 | Pig | Northeastern | 0 | 0 | 0 | 0 | 0 | 0 |
| 6781 | Pig | Northeastern | 0 | 0 | 0 | 0 | 0 | 0 |
| 6782 | Pig | Northeastern | 0 | 0 | 0 | 0 | 0 | 0 |
| 6783 | Pig | Northeastern | 0 | 0 | 0 | 0 | 0 | 0 |
| 6784 | Pig | Northeastern | 0 | 0 | 0 | 0 | 0 | 0 |
| 6785 | Pig | Northeastern | 0 | 0 | 0 | 0 | 0 | 0 |
| 6786 | Pig | Northeastern | 0 | 0 | 0 | 0 | 0 | 0 |
| 6787 | Pig | Northeastern | 0 | 0 | 0 | 0 | 0 | 0 |
| 6788 | Pig | Northeastern | 0 | 0 | 0 | 0 | 0 | 0 |
| 6789 | Pig | Northeastern | 0 | 0 | 0 | 0 | 0 | 0 |
| 6790 | Pig | Northeastern | 0 | 0 | 0 | 0 | 0 | 0 |
| 6791 | Pig | Northeastern | 0 | 0 | 0 | 0 | 0 | 0 |
| 6792 | Pig | Northeastern | 0 | 0 | 0 | 0 | 0 | 0 |
| 6793 | Pig | Central      | 0 | 0 | 0 | 0 | 0 | 0 |
| 6794 | Pig | Central      | 0 | 0 | 0 | 0 | 0 | 0 |
| 6795 | Pig | Central      | 0 | 0 | 0 | 0 | 0 | 0 |
| 6796 | Pig | Central      | 0 | 0 | 0 | 0 | 0 | 0 |
| 6797 | Pig | Central      | 0 | 0 | 0 | 0 | 0 | 0 |
| 6798 | Pig | Central      | 0 | 0 | 0 | 0 | 0 | 0 |
| 6799 | Pig | Central      | 0 | 0 | 0 | 0 | 0 | 0 |
| 6800 | Pig | Central      | 0 | 0 | 0 | 0 | 0 | 0 |
| 6801 | Pig | Central      | 0 | 0 | 0 | 0 | 0 | 0 |
| 6802 | Pig | Central      | 0 | 0 | 0 | 0 | 0 | 0 |
| 6803 | Pig | Central      | 0 | 0 | 0 | 0 | 0 | 0 |
| 6804 | Pig | Central      | 0 | 0 | 0 | 0 | 0 | 0 |
| 6805 | Pig | Central      | 0 | 0 | 0 | 0 | 0 | 0 |
| 6806 | Pig | Central      | 0 | 0 | 0 | 0 | 0 | 0 |
| 6807 | Pig | Central      | 0 | 0 | 0 | 0 | 0 | 0 |
| 6808 | Pig | Central      | 0 | 0 | 0 | 0 | 0 | 0 |
| 6809 | Pig | Central      | 0 | 0 | 0 | 0 | 0 | 0 |
| 6810 | Pig | Central      | 0 | 0 | 0 | 0 | 0 | 0 |
| 6811 | Pig | Central      | 0 | 0 | 0 | 0 | 0 | 0 |
| 6812 | Pig | Central      | 0 | 0 | 0 | 0 | 0 | 0 |
| 6813 | Pig | Central      | 0 | 0 | 0 | 0 | 0 | 0 |
| 6814 | Pig | Central      | 0 | 0 | 0 | 0 | 0 | 0 |
| 6815 | Pig | Central      | 0 | 0 | 0 | 0 | 0 | 0 |

|      |     |         |   |   |   |   |   |   |
|------|-----|---------|---|---|---|---|---|---|
| 6816 | Pig | Central | 0 | 0 | 0 | 0 | 0 | 0 |
| 6817 | Pig | Central | 0 | 0 | 0 | 0 | 0 | 0 |
| 6818 | Pig | Central | 0 | 0 | 0 | 0 | 0 | 0 |
| 6819 | Pig | Central | 0 | 0 | 0 | 0 | 0 | 0 |
| 6820 | Pig | Central | 0 | 0 | 0 | 0 | 0 | 0 |
| 6821 | Pig | Central | 0 | 0 | 0 | 0 | 0 | 0 |
| 6822 | Pig | Central | 0 | 0 | 0 | 0 | 0 | 0 |
| 6823 | Pig | Central | 0 | 0 | 0 | 0 | 0 | 0 |
| 6824 | Pig | Central | 0 | 0 | 0 | 0 | 0 | 0 |
| 6825 | Pig | Central | 0 | 0 | 0 | 0 | 0 | 0 |
| 6826 | Pig | Central | 0 | 0 | 0 | 0 | 0 | 0 |
| 6827 | Pig | Central | 0 | 0 | 0 | 1 | 0 | 1 |
| 6828 | Pig | Central | 0 | 0 | 0 | 0 | 0 | 0 |
| 6829 | Pig | Central | 0 | 0 | 0 | 0 | 0 | 0 |
| 6830 | Pig | Central | 0 | 0 | 0 | 0 | 0 | 0 |
| 6831 | Pig | Central | 0 | 0 | 0 | 0 | 0 | 0 |
| 6832 | Pig | Central | 0 | 0 | 0 | 0 | 0 | 0 |
| 6833 | Pig | Central | 0 | 0 | 0 | 0 | 0 | 0 |
| 6834 | Pig | Central | 0 | 0 | 0 | 0 | 0 | 0 |
| 6835 | Pig | Central | 0 | 0 | 0 | 0 | 0 | 0 |
| 6836 | Pig | Central | 0 | 0 | 0 | 0 | 0 | 0 |
| 6837 | Pig | Central | 0 | 0 | 0 | 0 | 0 | 0 |
| 6838 | Pig | Central | 0 | 0 | 0 | 0 | 0 | 0 |
| 6839 | Pig | Central | 0 | 0 | 0 | 0 | 0 | 0 |
| 6840 | Pig | Central | 0 | 0 | 0 | 0 | 0 | 0 |
| 6841 | Pig | Central | 0 | 0 | 0 | 0 | 0 | 0 |
| 6842 | Pig | Central | 0 | 0 | 0 | 1 | 0 | 1 |
| 6843 | Pig | Central | 0 | 0 | 0 | 0 | 0 | 0 |
| 6844 | Pig | Central | 0 | 0 | 0 | 0 | 0 | 0 |
| 6845 | Pig | Central | 0 | 0 | 0 | 0 | 0 | 0 |
| 6846 | Pig | Central | 0 | 0 | 0 | 0 | 0 | 0 |
| 6847 | Pig | Central | 0 | 0 | 0 | 0 | 0 | 0 |
| 6848 | Pig | Central | 0 | 0 | 0 | 0 | 0 | 0 |
| 6849 | Pig | Central | 0 | 0 | 0 | 1 | 0 | 1 |
| 6850 | Pig | Central | 0 | 0 | 0 | 0 | 0 | 0 |
| 6851 | Pig | Central | 0 | 0 | 0 | 0 | 0 | 0 |
| 6852 | Pig | Central | 0 | 0 | 0 | 0 | 0 | 0 |
| 6853 | Pig | Central | 0 | 0 | 0 | 0 | 0 | 0 |
| 6854 | Pig | Central | 0 | 0 | 0 | 0 | 0 | 0 |
| 6855 | Pig | Central | 0 | 0 | 0 | 0 | 0 | 0 |
| 6856 | Pig | Central | 0 | 0 | 0 | 0 | 0 | 0 |
| 6857 | Pig | Central | 0 | 0 | 0 | 0 | 0 | 0 |
| 6858 | Pig | Central | 0 | 0 | 0 | 0 | 0 | 0 |
| 6859 | Pig | Central | 0 | 0 | 0 | 1 | 0 | 1 |
| 6860 | Pig | Central | 0 | 0 | 0 | 0 | 0 | 0 |
| 6861 | Pig | Central | 0 | 0 | 0 | 0 | 0 | 0 |
| 6862 | Pig | Central | 0 | 0 | 0 | 0 | 0 | 0 |
| 6863 | Pig | Central | 0 | 0 | 0 | 0 | 0 | 0 |

|      |     |         |   |   |   |   |   |   |
|------|-----|---------|---|---|---|---|---|---|
| 6864 | Pig | Central | 0 | 0 | 0 | 0 | 0 | 0 |
| 6865 | Pig | Central | 0 | 0 | 0 | 0 | 0 | 0 |
| 6866 | Pig | Central | 0 | 0 | 0 | 0 | 0 | 0 |
| 6867 | Pig | Central | 0 | 0 | 0 | 0 | 0 | 0 |
| 6868 | Pig | Central | 0 | 0 | 0 | 1 | 0 | 1 |
| 6869 | Pig | Central | 0 | 0 | 0 | 0 | 0 | 0 |
| 6870 | Pig | Central | 0 | 0 | 0 | 0 | 0 | 0 |
| 6871 | Pig | Central | 0 | 0 | 0 | 0 | 0 | 0 |
| 6872 | Pig | Central | 0 | 0 | 0 | 0 | 0 | 0 |
| 6873 | Pig | Central | 0 | 0 | 0 | 0 | 0 | 0 |
| 6874 | Pig | Central | 0 | 0 | 0 | 0 | 0 | 0 |
| 6875 | Pig | Central | 0 | 0 | 0 | 0 | 0 | 0 |
| 6876 | Pig | Central | 0 | 0 | 0 | 0 | 0 | 0 |
| 6877 | Pig | Central | 0 | 0 | 0 | 0 | 0 | 0 |
| 6878 | Pig | Central | 0 | 0 | 0 | 0 | 0 | 0 |
| 6879 | Pig | Central | 0 | 0 | 0 | 0 | 0 | 0 |
| 6880 | Pig | Central | 0 | 0 | 0 | 0 | 0 | 0 |
| 6881 | Pig | Central | 0 | 0 | 0 | 0 | 0 | 0 |
| 6882 | Pig | Central | 0 | 0 | 0 | 0 | 0 | 0 |
| 6883 | Pig | Central | 0 | 0 | 0 | 0 | 0 | 0 |
| 6884 | Pig | Central | 0 | 0 | 0 | 0 | 0 | 0 |
| 6885 | Pig | Central | 0 | 0 | 0 | 0 | 0 | 0 |
| 6886 | Pig | Central | 0 | 0 | 0 | 0 | 0 | 0 |
| 6887 | Pig | Central | 0 | 0 | 0 | 0 | 0 | 0 |
| 6888 | Pig | Central | 0 | 0 | 0 | 0 | 0 | 0 |
| 6889 | Pig | Central | 0 | 0 | 0 | 0 | 0 | 0 |
| 6890 | Pig | Central | 0 | 0 | 0 | 0 | 0 | 0 |
| 6891 | Pig | Central | 0 | 0 | 0 | 0 | 0 | 0 |
| 6892 | Pig | Central | 0 | 0 | 0 | 0 | 0 | 0 |
| 6893 | Pig | Central | 0 | 0 | 0 | 0 | 0 | 0 |
| 6894 | Pig | Central | 0 | 0 | 0 | 0 | 0 | 0 |
| 6895 | Pig | Central | 0 | 0 | 0 | 0 | 0 | 0 |
| 6896 | Pig | Central | 0 | 0 | 0 | 0 | 0 | 0 |
| 6897 | Pig | Central | 0 | 0 | 0 | 0 | 0 | 0 |
| 6898 | Pig | Central | 0 | 0 | 0 | 0 | 0 | 0 |
| 6899 | Pig | Central | 0 | 0 | 0 | 0 | 0 | 0 |
| 6900 | Pig | Central | 0 | 0 | 0 | 0 | 0 | 0 |
| 6901 | Pig | Central | 0 | 0 | 0 | 0 | 0 | 0 |
| 6902 | Pig | Central | 0 | 0 | 0 | 0 | 0 | 0 |
| 6903 | Pig | Central | 0 | 0 | 0 | 0 | 0 | 0 |
| 6904 | Pig | Central | 0 | 0 | 0 | 0 | 0 | 0 |
| 6905 | Pig | Central | 0 | 0 | 0 | 0 | 0 | 0 |
| 6906 | Pig | Central | 0 | 0 | 0 | 0 | 0 | 0 |
| 6907 | Pig | Central | 0 | 0 | 0 | 0 | 0 | 0 |
| 6908 | Pig | Central | 0 | 0 | 0 | 0 | 0 | 0 |
| 6909 | Pig | Central | 0 | 0 | 0 | 0 | 0 | 0 |
| 6910 | Pig | Central | 0 | 0 | 0 | 0 | 0 | 0 |
| 6911 | Pig | Central | 0 | 0 | 0 | 0 | 0 | 0 |



|      |     |         |   |   |   |   |   |   |
|------|-----|---------|---|---|---|---|---|---|
| 6912 | Pig | Central | 0 | 0 | 0 | 0 | 0 | 0 |
| 6913 | Pig | Central | 0 | 0 | 0 | 0 | 0 | 0 |
| 6914 | Pig | Central | 0 | 0 | 0 | 0 | 0 | 0 |
| 6915 | Pig | Central | 0 | 0 | 0 | 0 | 0 | 0 |
| 6916 | Pig | Central | 0 | 0 | 0 | 0 | 0 | 0 |
| 6917 | Pig | Central | 0 | 0 | 0 | 0 | 0 | 0 |
| 6918 | Pig | Central | 0 | 0 | 0 | 0 | 0 | 0 |
| 6919 | Pig | Central | 0 | 0 | 0 | 0 | 0 | 0 |
| 6920 | Pig | Central | 0 | 0 | 0 | 1 | 0 | 1 |
| 6921 | Pig | Central | 0 | 0 | 0 | 0 | 0 | 0 |
| 6922 | Pig | Central | 0 | 0 | 0 | 0 | 0 | 0 |
| 6923 | Pig | Central | 0 | 0 | 0 | 0 | 0 | 0 |
| 6924 | Pig | Central | 0 | 0 | 0 | 0 | 0 | 0 |
| 6925 | Pig | Central | 1 | 1 | 0 | 1 | 0 | 1 |
| 6926 | Pig | Central | 0 | 0 | 0 | 0 | 0 | 0 |
| 6927 | Pig | Central | 0 | 0 | 0 | 0 | 0 | 0 |
| 6928 | Pig | Central | 0 | 0 | 0 | 0 | 0 | 0 |
| 6929 | Pig | Central | 0 | 0 | 0 | 0 | 0 | 0 |
| 6930 | Pig | Central | 0 | 0 | 0 | 0 | 0 | 0 |
| 6931 | Pig | Central | 0 | 0 | 0 | 0 | 0 | 0 |
| 6932 | Pig | Central | 0 | 0 | 0 | 0 | 0 | 0 |
| 6933 | Pig | Central | 0 | 0 | 0 | 0 | 0 | 0 |
| 6934 | Pig | Central | 0 | 0 | 0 | 0 | 0 | 0 |
| 6935 | Pig | Central | 0 | 0 | 0 | 0 | 0 | 0 |
| 6936 | Pig | Central | 0 | 0 | 0 | 0 | 0 | 0 |
| 6937 | Pig | Central | 0 | 0 | 0 | 0 | 0 | 0 |
| 6938 | Pig | Central | 0 | 0 | 0 | 0 | 0 | 0 |
| 6939 | Pig | Central | 0 | 0 | 0 | 0 | 0 | 0 |
| 6940 | Pig | Central | 0 | 0 | 0 | 0 | 0 | 0 |
| 6941 | Pig | Central | 0 | 0 | 0 | 0 | 0 | 0 |
| 6942 | Pig | Central | 0 | 0 | 0 | 0 | 0 | 0 |
| 6943 | Pig | Central | 0 | 0 | 0 | 0 | 0 | 0 |
| 6944 | Pig | Central | 0 | 0 | 0 | 1 | 0 | 1 |
| 6945 | Pig | Central | 0 | 0 | 0 | 0 | 0 | 0 |
| 6946 | Pig | Central | 0 | 0 | 0 | 0 | 0 | 0 |
| 6947 | Pig | Central | 0 | 0 | 0 | 0 | 0 | 0 |
| 6948 | Pig | Central | 0 | 0 | 0 | 0 | 0 | 0 |
| 6949 | Pig | Central | 0 | 0 | 0 | 0 | 0 | 0 |
| 6950 | Pig | Central | 0 | 0 | 0 | 0 | 0 | 0 |
| 6951 | Pig | Central | 0 | 0 | 0 | 1 | 0 | 1 |
| 6952 | Pig | Central | 0 | 0 | 0 | 0 | 0 | 0 |
| 6953 | Pig | Central | 0 | 0 | 0 | 0 | 0 | 0 |
| 6954 | Pig | Central | 0 | 0 | 0 | 0 | 0 | 0 |
| 6955 | Pig | Central | 0 | 0 | 0 | 0 | 0 | 0 |
| 6956 | Pig | Central | 0 | 0 | 0 | 1 | 0 | 1 |
| 6957 | Pig | Central | 0 | 0 | 0 | 0 | 0 | 0 |
| 6958 | Pig | Central | 0 | 0 | 0 | 0 | 0 | 0 |
| 6959 | Pig | Central | 0 | 0 | 0 | 0 | 0 | 0 |

|      |     |         |   |   |   |   |   |   |
|------|-----|---------|---|---|---|---|---|---|
| 6960 | Pig | Central | 0 | 0 | 0 | 0 | 0 | 0 |
| 6961 | Pig | Central | 0 | 0 | 0 | 0 | 0 | 0 |
| 6962 | Pig | Central | 0 | 0 | 0 | 0 | 0 | 0 |
| 6963 | Pig | Central | 0 | 0 | 0 | 0 | 0 | 0 |
| 6964 | Pig | Central | 0 | 0 | 0 | 0 | 0 | 0 |
| 6965 | Pig | Central | 0 | 0 | 0 | 0 | 0 | 0 |
| 6966 | Pig | Central | 0 | 0 | 0 | 0 | 0 | 0 |
| 6967 | Pig | Central | 0 | 0 | 0 | 0 | 0 | 0 |
| 6968 | Pig | Central | 0 | 0 | 0 | 0 | 0 | 0 |
| 6969 | Pig | Central | 0 | 0 | 0 | 0 | 0 | 0 |
| 6970 | Pig | Central | 0 | 0 | 0 | 0 | 0 | 0 |
| 6971 | Pig | Central | 0 | 0 | 0 | 0 | 0 | 0 |
| 6972 | Pig | Central | 0 | 0 | 0 | 0 | 0 | 0 |
| 6973 | Pig | Central | 0 | 0 | 0 | 0 | 0 | 0 |
| 6974 | Pig | Central | 0 | 0 | 0 | 0 | 0 | 0 |
| 6975 | Pig | Central | 0 | 0 | 0 | 0 | 0 | 0 |
| 6976 | Pig | Central | 0 | 0 | 0 | 0 | 0 | 0 |
| 6977 | Pig | Central | 0 | 0 | 0 | 0 | 0 | 0 |
| 6978 | Pig | Central | 0 | 0 | 0 | 0 | 0 | 0 |
| 6979 | Pig | Central | 0 | 0 | 0 | 0 | 0 | 0 |
| 6980 | Pig | Central | 0 | 0 | 0 | 0 | 0 | 0 |
| 6981 | Pig | Central | 0 | 0 | 0 | 0 | 0 | 0 |
| 6982 | Pig | Central | 0 | 0 | 0 | 0 | 0 | 0 |
| 6983 | Pig | Central | 0 | 0 | 0 | 1 | 0 | 1 |
| 6984 | Pig | Central | 0 | 0 | 0 | 0 | 0 | 0 |
| 6985 | Pig | Central | 0 | 0 | 0 | 0 | 0 | 0 |
| 6986 | Pig | Central | 0 | 0 | 0 | 0 | 0 | 0 |
| 6987 | Pig | Central | 0 | 0 | 0 | 0 | 0 | 0 |
| 6988 | Pig | Central | 0 | 0 | 0 | 0 | 0 | 0 |
| 6989 | Pig | Central | 0 | 0 | 0 | 0 | 0 | 0 |
| 6990 | Pig | Central | 0 | 0 | 0 | 0 | 0 | 0 |
| 6991 | Pig | Central | 0 | 0 | 0 | 0 | 0 | 0 |
| 6992 | Pig | Central | 0 | 0 | 0 | 1 | 0 | 1 |
| 6993 | Pig | Central | 0 | 0 | 0 | 1 | 0 | 1 |
| 6994 | Pig | Central | 0 | 0 | 0 | 0 | 0 | 0 |
| 6995 | Pig | Central | 0 | 0 | 0 | 0 | 0 | 0 |
| 6996 | Pig | Central | 0 | 0 | 0 | 0 | 0 | 0 |
| 6997 | Pig | Central | 0 | 0 | 0 | 0 | 0 | 0 |
| 6998 | Pig | Central | 0 | 0 | 0 | 0 | 0 | 0 |
| 6999 | Pig | Central | 0 | 0 | 0 | 0 | 0 | 0 |
| 7000 | Pig | Central | 0 | 0 | 0 | 0 | 0 | 0 |
| 7001 | Pig | Central | 0 | 0 | 0 | 0 | 0 | 0 |
| 7002 | Pig | Central | 0 | 0 | 0 | 0 | 0 | 0 |
| 7003 | Pig | Central | 0 | 0 | 0 | 0 | 0 | 0 |
| 7004 | Pig | Central | 0 | 0 | 0 | 0 | 0 | 0 |
| 7005 | Pig | Central | 0 | 0 | 0 | 0 | 0 | 0 |
| 7006 | Pig | Central | 0 | 0 | 0 | 0 | 0 | 0 |
| 7007 | Pig | Central | 0 | 0 | 0 | 0 | 0 | 0 |

|      |     |              |   |   |   |   |   |   |
|------|-----|--------------|---|---|---|---|---|---|
| 7008 | Pig | Central      | 0 | 0 | 0 | 0 | 0 | 0 |
| 7009 | Pig | Central      | 0 | 0 | 0 | 0 | 0 | 0 |
| 7010 | Pig | Central      | 0 | 0 | 0 | 0 | 0 | 0 |
| 7011 | Pig | Central      | 0 | 0 | 0 | 0 | 0 | 0 |
| 7012 | Pig | Central      | 0 | 0 | 0 | 0 | 0 | 0 |
| 7013 | Pig | Central      | 0 | 0 | 0 | 1 | 0 | 1 |
| 7014 | Pig | Central      | 0 | 0 | 0 | 1 | 0 | 1 |
| 7015 | Pig | Central      | 0 | 0 | 0 | 0 | 0 | 0 |
| 7016 | Pig | Central      | 0 | 0 | 0 | 0 | 0 | 0 |
| 7017 | Pig | Central      | 0 | 0 | 0 | 0 | 0 | 0 |
| 7018 | Pig | Central      | 0 | 0 | 0 | 1 | 0 | 1 |
| 7019 | Pig | Central      | 0 | 0 | 0 | 0 | 0 | 0 |
| 7020 | Pig | Central      | 0 | 0 | 0 | 0 | 0 | 0 |
| 7021 | Pig | Central      | 0 | 0 | 0 | 0 | 0 | 0 |
| 7022 | Pig | Central      | 0 | 0 | 0 | 0 | 0 | 0 |
| 7023 | Pig | Central      | 0 | 0 | 0 | 0 | 0 | 0 |
| 7024 | Pig | Central      | 0 | 0 | 0 | 0 | 0 | 0 |
| 7025 | Pig | Central      | 0 | 0 | 0 | 0 | 0 | 0 |
| 7026 | Pig | Central      | 0 | 0 | 0 | 0 | 0 | 0 |
| 7027 | Pig | Central      | 0 | 0 | 0 | 0 | 0 | 0 |
| 7028 | Pig | Central      | 0 | 0 | 0 | 0 | 0 | 0 |
| 7029 | Pig | Central      | 0 | 0 | 0 | 0 | 0 | 0 |
| 7030 | Pig | Central      | 0 | 0 | 0 | 0 | 0 | 0 |
| 7031 | Pig | Central      | 0 | 0 | 0 | 0 | 0 | 0 |
| 7032 | Pig | Northeastern | 0 | 0 | 0 | 0 | 0 | 0 |
| 7033 | Pig | Northeastern | 0 | 0 | 0 | 0 | 0 | 0 |
| 7034 | Pig | Northeastern | 0 | 0 | 0 | 0 | 0 | 0 |
| 7035 | Pig | Northeastern | 0 | 0 | 0 | 0 | 0 | 0 |
| 7036 | Pig | Northeastern | 0 | 0 | 0 | 1 | 0 | 1 |
| 7037 | Pig | Northeastern | 0 | 0 | 0 | 0 | 0 | 0 |
| 7038 | Pig | Northeastern | 0 | 0 | 0 | 0 | 0 | 0 |
| 7039 | Pig | Northeastern | 0 | 0 | 0 | 0 | 0 | 0 |
| 7040 | Pig | Northeastern | 0 | 0 | 0 | 0 | 0 | 0 |
| 7041 | Pig | Northeastern | 0 | 0 | 0 | 0 | 0 | 0 |
| 7042 | Pig | Northeastern | 0 | 0 | 0 | 0 | 0 | 0 |
| 7043 | Pig | Northeastern | 0 | 0 | 0 | 1 | 0 | 1 |
| 7044 | Pig | Northeastern | 0 | 0 | 0 | 1 | 0 | 1 |
| 7045 | Pig | Northeastern | 0 | 0 | 0 | 0 | 0 | 0 |
| 7046 | Pig | Northeastern | 0 | 0 | 0 | 0 | 0 | 0 |
| 7047 | Pig | Northeastern | 0 | 0 | 0 | 0 | 0 | 0 |
| 7048 | Pig | Northeastern | 0 | 0 | 0 | 0 | 0 | 0 |
| 7049 | Pig | Northeastern | 0 | 0 | 0 | 0 | 0 | 0 |
| 7050 | Pig | Northeastern | 0 | 0 | 0 | 0 | 0 | 0 |
| 7051 | Pig | Northeastern | 0 | 0 | 0 | 0 | 0 | 0 |
| 7052 | Pig | Northeastern | 0 | 0 | 0 | 0 | 0 | 0 |
| 7053 | Pig | Northeastern | 0 | 0 | 0 | 0 | 0 | 0 |
| 7054 | Pig | Northeastern | 0 | 0 | 0 | 0 | 0 | 0 |
| 7055 | Pig | Northeastern | 0 | 0 | 0 | 0 | 0 | 0 |

|      |     |              |   |   |   |   |   |   |
|------|-----|--------------|---|---|---|---|---|---|
| 7056 | Pig | Northeastern | 0 | 0 | 0 | 0 | 0 | 0 |
| 7057 | Pig | Northeastern | 0 | 0 | 0 | 0 | 0 | 0 |
| 7058 | Pig | Northeastern | 0 | 0 | 0 | 0 | 0 | 0 |
| 7059 | Pig | Northeastern | 0 | 0 | 0 | 0 | 0 | 0 |
| 7060 | Pig | Northeastern | 0 | 0 | 0 | 0 | 0 | 0 |
| 7061 | Pig | Northeastern | 0 | 0 | 0 | 0 | 0 | 0 |
| 7062 | Pig | Northeastern | 0 | 0 | 0 | 0 | 0 | 0 |
| 7063 | Pig | Northeastern | 0 | 0 | 0 | 0 | 0 | 0 |
| 7064 | Pig | Northeastern | 0 | 0 | 0 | 1 | 0 | 1 |
| 7065 | Pig | Northeastern | 0 | 0 | 0 | 1 | 0 | 1 |
| 7066 | Pig | Northeastern | 0 | 0 | 0 | 1 | 0 | 1 |
| 7067 | Pig | Northeastern | 0 | 0 | 0 | 0 | 0 | 0 |
| 7068 | Pig | Northeastern | 0 | 0 | 0 | 1 | 0 | 1 |
| 7069 | Pig | Northeastern | 0 | 0 | 0 | 0 | 0 | 0 |
| 7070 | Pig | Northeastern | 0 | 0 | 0 | 0 | 0 | 0 |
| 7071 | Pig | Northeastern | 0 | 0 | 0 | 0 | 0 | 0 |
| 7072 | Pig | Northeastern | 0 | 0 | 0 | 1 | 0 | 1 |
| 7073 | Pig | Northeastern | 0 | 0 | 0 | 1 | 0 | 1 |
| 7074 | Pig | Northeastern | 0 | 0 | 0 | 1 | 0 | 1 |
| 7075 | Pig | Northeastern | 0 | 0 | 0 | 0 | 0 | 0 |
| 7076 | Pig | Northeastern | 0 | 0 | 1 | 1 | 0 | 1 |
| 7077 | Pig | Northeastern | 0 | 0 | 0 | 0 | 0 | 0 |
| 7078 | Pig | Northeastern | 0 | 0 | 0 | 0 | 0 | 0 |
| 7079 | Pig | Northeastern | 0 | 0 | 0 | 0 | 0 | 0 |
| 7080 | Pig | Northeastern | 0 | 0 | 0 | 0 | 0 | 0 |
| 7081 | Pig | Northeastern | 0 | 0 | 1 | 1 | 0 | 1 |
| 7082 | Pig | Northeastern | 0 | 0 | 0 | 0 | 0 | 0 |
| 7083 | Pig | Northeastern | 0 | 0 | 0 | 0 | 0 | 0 |
| 7084 | Pig | Northeastern | 0 | 0 | 0 | 0 | 0 | 0 |
| 7085 | Pig | Northeastern | 0 | 0 | 0 | 0 | 0 | 0 |
| 7086 | Pig | Northeastern | 0 | 0 | 0 | 0 | 0 | 0 |
| 7087 | Pig | Northeastern | 0 | 0 | 0 | 0 | 0 | 0 |
| 7088 | Pig | Northeastern | 0 | 0 | 0 | 1 | 0 | 1 |
| 7089 | Pig | Northeastern | 0 | 0 | 0 | 0 | 0 | 0 |
| 7090 | Pig | Central      | 0 | 0 | 0 | 0 | 0 | 0 |
| 7091 | Pig | Central      | 0 | 0 | 0 | 0 | 0 | 0 |
| 7092 | Pig | Central      | 0 | 0 | 0 | 0 | 0 | 0 |
| 7093 | Pig | Central      | 0 | 0 | 0 | 0 | 0 | 0 |
| 7094 | Pig | Central      | 0 | 0 | 0 | 0 | 0 | 0 |
| 7095 | Pig | Central      | 0 | 0 | 0 | 0 | 0 | 0 |
| 7096 | Pig | Central      | 0 | 0 | 0 | 0 | 0 | 0 |
| 7097 | Pig | Central      | 0 | 0 | 0 | 0 | 0 | 0 |
| 7098 | Pig | Central      | 0 | 0 | 0 | 0 | 0 | 0 |
| 7099 | Pig | Central      | 0 | 0 | 0 | 0 | 0 | 0 |
| 7100 | Pig | Central      | 0 | 0 | 0 | 0 | 0 | 0 |
| 7101 | Pig | Central      | 0 | 0 | 0 | 0 | 0 | 0 |
| 7102 | Pig | Central      | 0 | 0 | 0 | 0 | 0 | 0 |
| 7103 | Pig | Central      | 0 | 0 | 0 | 0 | 0 | 0 |

|      |     |         |   |   |   |   |   |   |
|------|-----|---------|---|---|---|---|---|---|
| 7104 | Pig | Central | 0 | 0 | 0 | 0 | 0 | 0 |
| 7105 | Pig | Central | 0 | 0 | 0 | 0 | 0 | 0 |
| 7106 | Pig | Central | 0 | 0 | 0 | 0 | 0 | 0 |
| 7107 | Pig | Central | 0 | 0 | 0 | 0 | 0 | 0 |
| 7108 | Pig | Central | 0 | 0 | 0 | 0 | 0 | 0 |
| 7109 | Pig | Central | 0 | 0 | 0 | 0 | 0 | 0 |
| 7110 | Pig | Central | 0 | 0 | 0 | 0 | 0 | 0 |
| 7111 | Pig | Central | 0 | 0 | 0 | 0 | 0 | 0 |
| 7112 | Pig | Central | 0 | 0 | 0 | 0 | 0 | 0 |
| 7113 | Pig | Central | 0 | 0 | 0 | 0 | 0 | 0 |
| 7114 | Pig | Central | 0 | 0 | 0 | 0 | 0 | 0 |
| 7115 | Pig | Central | 0 | 0 | 0 | 0 | 0 | 0 |
| 7116 | Pig | Central | 0 | 0 | 0 | 0 | 0 | 0 |
| 7117 | Pig | Central | 0 | 0 | 0 | 0 | 0 | 0 |
| 7118 | Pig | Central | 0 | 0 | 0 | 0 | 0 | 0 |
| 7119 | Pig | Central | 0 | 0 | 0 | 0 | 0 | 0 |
| 7120 | Pig | Eastern | 0 | 0 | 0 | 0 | 0 | 0 |
| 7121 | Pig | Eastern | 0 | 0 | 0 | 0 | 0 | 0 |
| 7122 | Pig | Eastern | 0 | 0 | 0 | 0 | 0 | 0 |
| 7123 | Pig | Eastern | 0 | 0 | 0 | 0 | 0 | 0 |
| 7124 | Pig | Eastern | 0 | 0 | 0 | 0 | 0 | 0 |
| 7125 | Pig | Eastern | 0 | 0 | 0 | 0 | 0 | 0 |
| 7126 | Pig | Eastern | 0 | 0 | 0 | 0 | 0 | 0 |
| 7127 | Pig | Eastern | 0 | 0 | 0 | 0 | 0 | 0 |
| 7128 | Pig | Eastern | 0 | 0 | 0 | 0 | 0 | 0 |
| 7129 | Pig | Eastern | 0 | 0 | 0 | 0 | 0 | 0 |
| 7130 | Pig | Eastern | 0 | 0 | 0 | 0 | 0 | 0 |
| 7131 | Pig | Eastern | 0 | 0 | 0 | 0 | 0 | 0 |
| 7132 | Pig | Eastern | 0 | 0 | 0 | 0 | 0 | 0 |
| 7133 | Pig | Eastern | 0 | 0 | 0 | 0 | 0 | 0 |
| 7134 | Pig | Eastern | 0 | 0 | 0 | 0 | 0 | 0 |
| 7135 | Pig | Eastern | 0 | 0 | 0 | 0 | 0 | 0 |
| 7136 | Pig | Eastern | 0 | 0 | 0 | 0 | 0 | 0 |
| 7137 | Pig | Eastern | 0 | 0 | 0 | 0 | 0 | 0 |
| 7138 | Pig | Eastern | 0 | 0 | 0 | 0 | 0 | 0 |
| 7139 | Pig | Eastern | 0 | 0 | 0 | 0 | 0 | 0 |
| 7140 | Pig | Eastern | 0 | 0 | 0 | 0 | 0 | 0 |
| 7141 | Pig | Eastern | 0 | 0 | 0 | 0 | 0 | 0 |
| 7142 | Pig | Eastern | 0 | 0 | 0 | 0 | 0 | 0 |
| 7143 | Pig | Eastern | 0 | 0 | 0 | 0 | 0 | 0 |
| 7144 | Pig | Eastern | 0 | 0 | 0 | 0 | 0 | 0 |
| 7145 | Pig | Eastern | 0 | 0 | 0 | 0 | 0 | 0 |
| 7146 | Pig | Eastern | 0 | 0 | 0 | 0 | 0 | 0 |
| 7147 | Pig | Eastern | 0 | 0 | 0 | 0 | 0 | 0 |
| 7148 | Pig | Eastern | 0 | 0 | 0 | 0 | 0 | 0 |
| 7149 | Pig | Eastern | 0 | 0 | 0 | 0 | 0 | 0 |
| 7150 | Pig | Eastern | 0 | 0 | 0 | 0 | 0 | 0 |
| 7151 | Pig | Eastern | 0 | 0 | 0 | 0 | 0 | 0 |

|      |     |         |   |   |   |   |   |   |
|------|-----|---------|---|---|---|---|---|---|
| 7152 | Pig | Eastern | 0 | 0 | 0 | 0 | 0 | 0 |
| 7153 | Pig | Eastern | 0 | 0 | 0 | 0 | 0 | 0 |
| 7154 | Pig | Eastern | 0 | 0 | 0 | 0 | 0 | 0 |
| 7155 | Pig | Eastern | 0 | 0 | 0 | 0 | 0 | 0 |
| 7156 | Pig | Eastern | 0 | 0 | 0 | 0 | 0 | 0 |
| 7157 | Pig | Eastern | 0 | 0 | 0 | 0 | 0 | 0 |
| 7158 | Pig | Eastern | 0 | 0 | 0 | 0 | 0 | 0 |
| 7159 | Pig | Eastern | 0 | 0 | 0 | 0 | 0 | 0 |
| 7160 | Pig | Eastern | 0 | 0 | 0 | 0 | 0 | 0 |
| 7161 | Pig | Eastern | 0 | 0 | 0 | 0 | 0 | 0 |
| 7162 | Pig | Eastern | 0 | 0 | 0 | 0 | 0 | 0 |
| 7163 | Pig | Eastern | 0 | 0 | 0 | 0 | 0 | 0 |
| 7164 | Pig | Central | 0 | 0 | 0 | 0 | 0 | 0 |
| 7165 | Pig | Central | 0 | 0 | 0 | 0 | 0 | 0 |
| 7166 | Pig | Central | 0 | 0 | 0 | 0 | 0 | 0 |
| 7167 | Pig | Central | 0 | 0 | 0 | 0 | 0 | 1 |
| 7168 | Pig | Central | 1 | 0 | 0 | 0 | 0 | 1 |
| 7169 | Pig | Central | 0 | 0 | 0 | 0 | 0 | 0 |
| 7170 | Pig | Central | 0 | 0 | 0 | 0 | 0 | 1 |
| 7171 | Pig | Central | 0 | 0 | 0 | 0 | 0 | 0 |
| 7172 | Pig | Central | 0 | 0 | 0 | 0 | 0 | 0 |
| 7173 | Pig | Central | 0 | 0 | 0 | 0 | 0 | 0 |
| 7174 | Pig | Central | 0 | 0 | 0 | 0 | 0 | 0 |
| 7175 | Pig | Central | 0 | 0 | 0 | 0 | 0 | 0 |
| 7176 | Pig | Central | 0 | 0 | 0 | 0 | 0 | 0 |
| 7177 | Pig | Central | 0 | 0 | 0 | 0 | 0 | 0 |
| 7178 | Pig | Central | 0 | 0 | 0 | 0 | 0 | 0 |
| 7179 | Pig | Central | 0 | 0 | 0 | 0 | 0 | 0 |
| 7180 | Pig | Central | 0 | 0 | 0 | 0 | 0 | 0 |
| 7181 | Pig | Central | 0 | 0 | 0 | 0 | 0 | 0 |
| 7182 | Pig | Central | 0 | 0 | 0 | 0 | 0 | 0 |
| 7183 | Pig | Central | 0 | 0 | 0 | 0 | 0 | 0 |
| 7184 | Pig | Central | 0 | 0 | 0 | 0 | 0 | 0 |
| 7185 | Pig | Central | 0 | 0 | 0 | 0 | 0 | 0 |
| 7186 | Pig | Central | 0 | 0 | 0 | 0 | 0 | 0 |
| 7187 | Pig | Central | 0 | 0 | 0 | 0 | 0 | 0 |
| 7188 | Pig | Central | 0 | 0 | 0 | 0 | 0 | 0 |
| 7189 | Pig | Central | 0 | 0 | 0 | 0 | 0 | 0 |
| 7190 | Pig | Central | 0 | 0 | 0 | 0 | 0 | 0 |
| 7191 | Pig | Central | 0 | 0 | 0 | 0 | 0 | 0 |
| 7192 | Pig | Central | 0 | 0 | 0 | 0 | 0 | 0 |
| 7193 | Pig | Central | 0 | 0 | 0 | 0 | 0 | 0 |
| 7194 | Pig | Central | 0 | 0 | 0 | 0 | 0 | 0 |
| 7195 | Pig | Central | 0 | 0 | 0 | 0 | 0 | 0 |
| 7196 | Pig | Central | 0 | 0 | 0 | 0 | 0 | 0 |
| 7197 | Pig | Central | 0 | 0 | 0 | 0 | 0 | 0 |
| 7198 | Pig | Central | 0 | 0 | 0 | 0 | 0 | 0 |
| 7199 | Pig | Central | 0 | 0 | 0 | 0 | 0 | 0 |

|      |     |          |   |   |   |   |   |   |
|------|-----|----------|---|---|---|---|---|---|
| 7200 | Pig | Central  | 0 | 0 | 0 | 0 | 0 | 0 |
| 7201 | Pig | Central  | 0 | 0 | 0 | 0 | 0 | 0 |
| 7202 | Pig | Central  | 0 | 0 | 0 | 0 | 0 | 0 |
| 7203 | Pig | Central  | 0 | 0 | 0 | 0 | 0 | 0 |
| 7204 | Pig | Central  | 0 | 0 | 0 | 0 | 0 | 0 |
| 7205 | Pig | Central  | 0 | 0 | 0 | 0 | 0 | 0 |
| 7206 | Pig | Central  | 0 | 0 | 0 | 0 | 0 | 0 |
| 7207 | Pig | Central  | 0 | 0 | 0 | 0 | 0 | 0 |
| 7208 | Pig | Central  | 0 | 0 | 0 | 0 | 0 | 0 |
| 7209 | Pig | Central  | 0 | 0 | 0 | 0 | 0 | 0 |
| 7210 | Pig | Central  | 0 | 0 | 0 | 0 | 0 | 0 |
| 7211 | Pig | Central  | 0 | 0 | 0 | 0 | 0 | 0 |
| 7212 | Pig | Central  | 0 | 0 | 0 | 0 | 0 | 0 |
| 7213 | Pig | Central  | 0 | 0 | 0 | 0 | 0 | 0 |
| 7214 | Pig | Central  | 0 | 0 | 0 | 0 | 0 | 0 |
| 7215 | Pig | Central  | 0 | 0 | 0 | 0 | 0 | 0 |
| 7216 | Pig | Central  | 0 | 0 | 0 | 0 | 0 | 0 |
| 7217 | Pig | Central  | 0 | 0 | 0 | 0 | 0 | 0 |
| 7218 | Pig | Central  | 0 | 0 | 0 | 0 | 0 | 0 |
| 7219 | Pig | Central  | 0 | 0 | 0 | 0 | 0 | 0 |
| 7220 | Pig | Central  | 0 | 0 | 0 | 0 | 0 | 0 |
| 7221 | Pig | Central  | 0 | 0 | 0 | 0 | 0 | 0 |
| 7222 | Pig | Central  | 0 | 0 | 0 | 0 | 0 | 0 |
| 7223 | Pig | Central  | 0 | 0 | 0 | 0 | 0 | 0 |
| 7224 | Pig | Central  | 0 | 0 | 0 | 0 | 0 | 0 |
| 7225 | Pig | Central  | 0 | 0 | 0 | 0 | 0 | 0 |
| 7226 | Pig | Central  | 0 | 0 | 0 | 0 | 0 | 0 |
| 7227 | Pig | Central  | 0 | 0 | 0 | 0 | 0 | 0 |
| 7228 | Pig | Central  | 0 | 0 | 0 | 0 | 0 | 0 |
| 7229 | Pig | Central  | 0 | 0 | 0 | 0 | 0 | 0 |
| 7230 | Pig | Central  | 0 | 0 | 0 | 0 | 0 | 0 |
| 7231 | Pig | Central  | 0 | 0 | 0 | 0 | 0 | 0 |
| 7232 | Pig | Central  | 0 | 0 | 0 | 0 | 0 | 0 |
| 7233 | Pig | Central  | 0 | 0 | 0 | 0 | 0 | 0 |
| 7234 | Pig | Central  | 0 | 0 | 0 | 0 | 0 | 0 |
| 7235 | Pig | Central  | 0 | 0 | 0 | 0 | 0 | 0 |
| 7236 | Pig | Central  | 0 | 0 | 0 | 0 | 0 | 0 |
| 7237 | Pig | Central  | 0 | 0 | 0 | 0 | 0 | 0 |
| 7238 | Pig | Central  | 0 | 0 | 0 | 0 | 0 | 0 |
| 7239 | Pig | Central  | 0 | 0 | 0 | 0 | 0 | 0 |
| 7240 | Pig | Central  | 0 | 0 | 0 | 0 | 0 | 0 |
| 7241 | Pig | Central  | 0 | 0 | 0 | 0 | 0 | 0 |
| 7242 | Pig | Southern | 0 | 0 | 0 | 0 | 0 | 0 |
| 7243 | Pig | Southern | 0 | 0 | 0 | 0 | 0 | 0 |
| 7244 | Pig | Southern | 0 | 0 | 0 | 0 | 0 | 0 |
| 7245 | Pig | Southern | 0 | 0 | 0 | 0 | 0 | 0 |
| 7246 | Pig | Southern | 0 | 0 | 0 | 0 | 0 | 0 |
| 7247 | Pig | Southern | 0 | 0 | 0 | 0 | 0 | 0 |

|      |     |          |   |   |   |   |   |   |
|------|-----|----------|---|---|---|---|---|---|
| 7248 | Pig | Southern | 0 | 0 | 0 | 0 | 0 | 0 |
| 7249 | Pig | Southern | 0 | 0 | 0 | 0 | 0 | 0 |
| 7250 | Pig | Southern | 0 | 0 | 0 | 0 | 0 | 0 |
| 7251 | Pig | Southern | 0 | 0 | 0 | 0 | 0 | 0 |
| 7252 | Pig | Southern | 0 | 0 | 0 | 0 | 0 | 0 |
| 7253 | Pig | Southern | 0 | 0 | 0 | 0 | 0 | 0 |
| 7254 | Pig | Southern | 0 | 0 | 0 | 0 | 0 | 0 |
| 7255 | Pig | Southern | 0 | 0 | 0 | 0 | 0 | 0 |
| 7256 | Pig | Southern | 0 | 0 | 0 | 0 | 0 | 0 |
| 7257 | Pig | Southern | 0 | 0 | 0 | 0 | 0 | 0 |
| 7258 | Pig | Southern | 0 | 0 | 0 | 0 | 0 | 0 |
| 7259 | Pig | Southern | 0 | 0 | 0 | 0 | 0 | 0 |
| 7260 | Pig | Southern | 0 | 0 | 0 | 0 | 0 | 0 |
| 7261 | Pig | Southern | 0 | 0 | 0 | 0 | 0 | 0 |
| 7262 | Pig | Southern | 0 | 0 | 0 | 0 | 0 | 0 |
| 7263 | Pig | Southern | 0 | 0 | 0 | 0 | 0 | 0 |
| 7264 | Pig | Southern | 0 | 0 | 0 | 0 | 0 | 0 |
| 7265 | Pig | Southern | 0 | 0 | 0 | 0 | 0 | 0 |
| 7266 | Pig | Southern | 0 | 0 | 0 | 0 | 0 | 0 |
| 7267 | Pig | Southern | 0 | 0 | 0 | 0 | 0 | 0 |
| 7268 | Pig | Southern | 0 | 0 | 0 | 0 | 0 | 0 |
| 7269 | Pig | Southern | 0 | 0 | 0 | 0 | 0 | 0 |
| 7270 | Pig | Southern | 0 | 0 | 0 | 0 | 0 | 0 |
| 7271 | Pig | Southern | 0 | 0 | 0 | 0 | 0 | 0 |
| 7272 | Pig | Eastern  | 0 | 0 | 1 | 1 | 0 | 1 |
| 7273 | Pig | Eastern  | 0 | 0 | 0 | 1 | 0 | 1 |
| 7274 | Pig | Eastern  | 0 | 0 | 0 | 1 | 0 | 1 |
| 7275 | Pig | Eastern  | 0 | 0 | 0 | 0 | 0 | 0 |
| 7276 | Pig | Eastern  | 0 | 0 | 0 | 1 | 0 | 1 |
| 7277 | Pig | Eastern  | 0 | 0 | 0 | 0 | 0 | 0 |
| 7278 | Pig | Eastern  | 0 | 0 | 0 | 0 | 0 | 0 |
| 7279 | Pig | Eastern  | 0 | 0 | 0 | 0 | 0 | 0 |
| 7280 | Pig | Eastern  | 0 | 0 | 0 | 0 | 0 | 0 |
| 7281 | Pig | Eastern  | 0 | 0 | 0 | 1 | 0 | 1 |
| 7282 | Pig | Eastern  | 0 | 0 | 0 | 0 | 0 | 0 |
| 7283 | Pig | Eastern  | 0 | 0 | 0 | 1 | 0 | 1 |
| 7284 | Pig | Eastern  | 0 | 0 | 0 | 0 | 0 | 0 |
| 7285 | Pig | Eastern  | 0 | 0 | 0 | 0 | 0 | 0 |
| 7286 | Pig | Eastern  | 0 | 0 | 0 | 0 | 0 | 0 |
| 7287 | Pig | Eastern  | 0 | 0 | 0 | 0 | 0 | 0 |
| 7288 | Pig | Eastern  | 0 | 0 | 0 | 0 | 0 | 0 |
| 7289 | Pig | Eastern  | 0 | 0 | 0 | 0 | 0 | 0 |
| 7290 | Pig | Eastern  | 0 | 0 | 0 | 0 | 0 | 0 |
| 7291 | Pig | Eastern  | 0 | 0 | 0 | 0 | 0 | 0 |
| 7292 | Pig | Eastern  | 0 | 0 | 0 | 0 | 0 | 0 |
| 7293 | Pig | Eastern  | 0 | 0 | 0 | 0 | 0 | 0 |
| 7294 | Pig | Eastern  | 0 | 0 | 0 | 0 | 0 | 0 |
| 7295 | Pig | Eastern  | 0 | 0 | 0 | 0 | 0 | 0 |



|      |     |         |   |   |   |   |   |   |
|------|-----|---------|---|---|---|---|---|---|
| 7296 | Pig | Eastern | 0 | 0 | 0 | 0 | 0 | 0 |
| 7297 | Pig | Eastern | 0 | 0 | 0 | 0 | 0 | 0 |
| 7298 | Pig | Eastern | 0 | 0 | 0 | 0 | 0 | 0 |
| 7299 | Pig | Eastern | 0 | 0 | 0 | 0 | 0 | 0 |
| 7300 | Pig | Eastern | 0 | 0 | 0 | 0 | 0 | 0 |
| 7301 | Pig | Eastern | 0 | 0 | 0 | 0 | 0 | 0 |
| 7302 | Pig | Central | 0 | 0 | 0 | 0 | 0 | 0 |
| 7303 | Pig | Central | 0 | 0 | 0 | 0 | 0 | 0 |
| 7304 | Pig | Central | 0 | 0 | 0 | 0 | 0 | 0 |
| 7305 | Pig | Central | 0 | 0 | 0 | 0 | 0 | 0 |
| 7306 | Pig | Central | 0 | 0 | 0 | 0 | 0 | 0 |
| 7307 | Pig | Central | 0 | 0 | 0 | 0 | 0 | 0 |
| 7308 | Pig | Central | 0 | 0 | 0 | 0 | 0 | 0 |
| 7309 | Pig | Central | 0 | 0 | 0 | 0 | 0 | 0 |
| 7310 | Pig | Central | 0 | 0 | 0 | 0 | 0 | 0 |
| 7311 | Pig | Central | 0 | 0 | 0 | 0 | 0 | 0 |
| 7312 | Pig | Central | 0 | 0 | 0 | 0 | 0 | 0 |
| 7313 | Pig | Central | 0 | 0 | 0 | 0 | 0 | 0 |
| 7314 | Pig | Central | 0 | 0 | 0 | 0 | 0 | 0 |
| 7315 | Pig | Central | 0 | 0 | 0 | 0 | 0 | 0 |
| 7316 | Pig | Central | 0 | 0 | 0 | 0 | 0 | 0 |
| 7317 | Pig | Central | 0 | 0 | 0 | 0 | 0 | 0 |
| 7318 | Pig | Central | 0 | 0 | 0 | 0 | 0 | 0 |
| 7319 | Pig | Central | 0 | 0 | 1 | 1 | 0 | 1 |
| 7320 | Pig | Central | 0 | 0 | 0 | 0 | 0 | 0 |
| 7321 | Pig | Central | 0 | 0 | 0 | 0 | 0 | 0 |
| 7322 | Pig | Central | 0 | 0 | 0 | 1 | 0 | 1 |
| 7323 | Pig | Central | 0 | 0 | 0 | 0 | 0 | 0 |
| 7324 | Pig | Central | 0 | 0 | 0 | 0 | 0 | 0 |
| 7325 | Pig | Central | 0 | 0 | 0 | 0 | 0 | 0 |
| 7326 | Pig | Central | 0 | 0 | 0 | 0 | 0 | 0 |
| 7327 | Pig | Central | 0 | 0 | 0 | 0 | 0 | 0 |
| 7328 | Pig | Central | 0 | 0 | 0 | 0 | 0 | 0 |
| 7329 | Pig | Central | 0 | 0 | 0 | 1 | 0 | 1 |
| 7330 | Pig | Central | 0 | 0 | 0 | 0 | 0 | 0 |
| 7331 | Pig | Central | 0 | 0 | 0 | 0 | 0 | 0 |
| 7332 | Pig | Central | 0 | 0 | 0 | 0 | 0 | 0 |
| 7333 | Pig | Central | 0 | 0 | 0 | 0 | 0 | 0 |
| 7334 | Pig | Central | 0 | 0 | 0 | 0 | 0 | 0 |
| 7335 | Pig | Central | 0 | 0 | 0 | 0 | 0 | 0 |
| 7336 | Pig | Central | 0 | 0 | 0 | 0 | 0 | 0 |
| 7337 | Pig | Central | 0 | 0 | 0 | 0 | 0 | 0 |
| 7338 | Pig | Central | 1 | 0 | 0 | 0 | 0 | 1 |
| 7339 | Pig | Central | 0 | 0 | 0 | 0 | 0 | 0 |
| 7340 | Pig | Central | 1 | 0 | 0 | 0 | 0 | 1 |
| 7341 | Pig | Central | 0 | 0 | 0 | 0 | 0 | 0 |
| 7342 | Pig | Central | 0 | 0 | 0 | 0 | 0 | 0 |
| 7343 | Pig | Central | 0 | 0 | 0 | 1 | 0 | 1 |

|      |     |         |   |   |   |   |   |   |
|------|-----|---------|---|---|---|---|---|---|
| 7344 | Pig | Central | 0 | 0 | 0 | 0 | 0 | 0 |
| 7345 | Pig | Central | 0 | 0 | 0 | 0 | 0 | 0 |
| 7346 | Pig | Central | 0 | 0 | 0 | 1 | 0 | 1 |
| 7347 | Pig | Central | 0 | 0 | 0 | 0 | 0 | 0 |
| 7348 | Pig | Central | 0 | 0 | 0 | 0 | 0 | 0 |
| 7349 | Pig | Central | 0 | 0 | 0 | 0 | 0 | 0 |
| 7350 | Pig | Central | 0 | 0 | 0 | 0 | 0 | 0 |
| 7351 | Pig | Central | 0 | 0 | 0 | 0 | 0 | 0 |
| 7352 | Pig | Central | 0 | 0 | 0 | 0 | 0 | 0 |
| 7353 | Pig | Central | 0 | 0 | 0 | 1 | 0 | 1 |
| 7354 | Pig | Central | 0 | 0 | 0 | 0 | 0 | 0 |
| 7355 | Pig | Central | 0 | 0 | 0 | 0 | 0 | 0 |
| 7356 | Pig | Central | 0 | 0 | 0 | 0 | 0 | 0 |
| 7357 | Pig | Central | 0 | 0 | 0 | 0 | 0 | 0 |
| 7358 | Pig | Central | 0 | 0 | 0 | 0 | 0 | 0 |
| 7359 | Pig | Central | 0 | 0 | 0 | 0 | 0 | 0 |
| 7360 | Pig | Central | 0 | 0 | 0 | 0 | 0 | 0 |
| 7361 | Pig | Central | 0 | 0 | 0 | 0 | 0 | 0 |
| 7362 | Pig | Central | 0 | 0 | 0 | 0 | 0 | 0 |
| 7363 | Pig | Central | 0 | 0 | 0 | 0 | 0 | 0 |
| 7364 | Pig | Central | 0 | 0 | 0 | 0 | 0 | 0 |
| 7365 | Pig | Central | 0 | 0 | 0 | 0 | 0 | 0 |
| 7366 | Pig | Central | 0 | 0 | 0 | 0 | 0 | 0 |
| 7367 | Pig | Central | 0 | 0 | 0 | 1 | 0 | 1 |
| 7368 | Pig | Central | 0 | 0 | 0 | 0 | 0 | 0 |
| 7369 | Pig | Central | 0 | 0 | 0 | 0 | 0 | 0 |
| 7370 | Pig | Central | 0 | 0 | 0 | 0 | 0 | 0 |
| 7371 | Pig | Central | 0 | 0 | 0 | 0 | 0 | 0 |
| 7372 | Pig | Central | 0 | 0 | 0 | 0 | 0 | 1 |
| 7373 | Pig | Central | 0 | 0 | 0 | 0 | 0 | 0 |
| 7374 | Pig | Central | 0 | 0 | 0 | 0 | 0 | 0 |
| 7375 | Pig | Central | 0 | 0 | 0 | 0 | 0 | 0 |
| 7376 | Pig | Central | 0 | 0 | 0 | 0 | 0 | 0 |
| 7377 | Pig | Central | 0 | 0 | 0 | 1 | 0 | 1 |
| 7378 | Pig | Central | 0 | 0 | 0 | 1 | 0 | 1 |
| 7379 | Pig | Central | 0 | 0 | 0 | 0 | 0 | 0 |
| 7380 | Pig | Central | 0 | 0 | 0 | 1 | 0 | 1 |
| 7381 | Pig | Central | 0 | 0 | 0 | 0 | 0 | 0 |
| 7382 | Pig | Central | 0 | 0 | 0 | 0 | 0 | 0 |
| 7383 | Pig | Central | 0 | 0 | 0 | 1 | 0 | 1 |
| 7384 | Pig | Central | 0 | 0 | 0 | 0 | 0 | 0 |
| 7385 | Pig | Central | 0 | 0 | 0 | 0 | 0 | 0 |
| 7386 | Pig | Central | 0 | 0 | 0 | 0 | 0 | 0 |
| 7387 | Pig | Central | 1 | 0 | 0 | 1 | 0 | 1 |
| 7388 | Pig | Central | 0 | 0 | 0 | 0 | 0 | 0 |
| 7389 | Pig | Central | 0 | 0 | 0 | 0 | 0 | 0 |
| 7390 | Pig | Central | 0 | 0 | 0 | 0 | 0 | 0 |
| 7391 | Pig | Central | 0 | 0 | 0 | 1 | 0 | 1 |

|      |     |         |   |   |   |   |   |   |
|------|-----|---------|---|---|---|---|---|---|
| 7392 | Pig | Central | 0 | 0 | 0 | 0 | 0 | 0 |
| 7393 | Pig | Central | 0 | 0 | 0 | 1 | 0 | 1 |
| 7394 | Pig | Central | 0 | 0 | 0 | 0 | 0 | 0 |
| 7395 | Pig | Central | 0 | 0 | 0 | 0 | 0 | 0 |
| 7396 | Pig | Central | 0 | 0 | 0 | 0 | 0 | 0 |
| 7397 | Pig | Central | 1 | 0 | 0 | 1 | 0 | 1 |
| 7398 | Pig | Central | 0 | 0 | 0 | 0 | 0 | 0 |
| 7399 | Pig | Central | 0 | 0 | 0 | 0 | 0 | 0 |
| 7400 | Pig | Central | 0 | 0 | 0 | 1 | 0 | 1 |
| 7401 | Pig | Central | 0 | 0 | 0 | 0 | 0 | 0 |
| 7402 | Pig | Central | 0 | 0 | 0 | 0 | 0 | 0 |
| 7403 | Pig | Central | 0 | 0 | 0 | 1 | 0 | 1 |
| 7404 | Pig | Central | 0 | 0 | 0 | 0 | 0 | 0 |
| 7405 | Pig | Central | 0 | 0 | 0 | 0 | 0 | 0 |
| 7406 | Pig | Central | 0 | 0 | 0 | 1 | 0 | 1 |
| 7407 | Pig | Central | 0 | 0 | 0 | 0 | 0 | 0 |
| 7408 | Pig | Central | 0 | 0 | 0 | 0 | 0 | 0 |
| 7409 | Pig | Central | 0 | 0 | 0 | 0 | 0 | 0 |
| 7410 | Pig | Central | 0 | 0 | 0 | 1 | 0 | 1 |
| 7411 | Pig | Central | 0 | 0 | 0 | 1 | 0 | 1 |
| 7412 | Pig | Central | 0 | 0 | 0 | 0 | 0 | 0 |
| 7413 | Pig | Central | 0 | 0 | 0 | 1 | 0 | 1 |
| 7414 | Pig | Central | 0 | 0 | 0 | 1 | 0 | 1 |
| 7415 | Pig | Central | 0 | 0 | 0 | 1 | 0 | 1 |
| 7416 | Pig | Central | 0 | 0 | 0 | 1 | 0 | 1 |
| 7417 | Pig | Central | 0 | 0 | 0 | 1 | 0 | 1 |
| 7418 | Pig | Central | 0 | 0 | 0 | 0 | 0 | 0 |
| 7419 | Pig | Central | 0 | 0 | 0 | 0 | 0 | 0 |
| 7420 | Pig | Central | 0 | 0 | 0 | 1 | 0 | 1 |
| 7421 | Pig | Central | 0 | 0 | 0 | 0 | 0 | 0 |
| 7422 | Pig | Central | 0 | 0 | 0 | 0 | 0 | 0 |
| 7423 | Pig | Central | 0 | 0 | 0 | 0 | 0 | 0 |
| 7424 | Pig | Central | 0 | 0 | 0 | 0 | 0 | 0 |
| 7425 | Pig | Central | 0 | 0 | 0 | 0 | 0 | 0 |
| 7426 | Pig | Central | 0 | 0 | 0 | 0 | 0 | 0 |
| 7427 | Pig | Central | 0 | 0 | 0 | 0 | 0 | 0 |
| 7428 | Pig | Central | 0 | 0 | 0 | 0 | 0 | 0 |
| 7429 | Pig | Central | 0 | 0 | 0 | 0 | 0 | 0 |
| 7430 | Pig | Central | 0 | 0 | 0 | 0 | 0 | 0 |
| 7431 | Pig | Central | 0 | 0 | 0 | 0 | 0 | 0 |
| 7432 | Pig | Central | 0 | 0 | 0 | 0 | 0 | 0 |
| 7433 | Pig | Central | 0 | 0 | 0 | 0 | 0 | 0 |
| 7434 | Pig | Central | 0 | 0 | 0 | 0 | 0 | 0 |
| 7435 | Pig | Central | 0 | 0 | 0 | 0 | 0 | 0 |
| 7436 | Pig | Central | 0 | 0 | 0 | 0 | 0 | 0 |
| 7437 | Pig | Central | 0 | 0 | 0 | 0 | 0 | 0 |
| 7438 | Pig | Central | 0 | 0 | 0 | 0 | 0 | 0 |
| 7439 | Pig | Central | 0 | 0 | 0 | 0 | 0 | 0 |

|      |     |         |   |   |   |   |   |   |
|------|-----|---------|---|---|---|---|---|---|
| 7440 | Pig | Central | 0 | 0 | 0 | 0 | 0 | 0 |
| 7441 | Pig | Central | 0 | 0 | 0 | 0 | 0 | 0 |
| 7442 | Pig | Central | 0 | 0 | 0 | 0 | 0 | 0 |
| 7443 | Pig | Central | 0 | 0 | 0 | 0 | 0 | 0 |
| 7444 | Pig | Central | 0 | 0 | 0 | 0 | 0 | 0 |
| 7445 | Pig | Central | 0 | 0 | 0 | 0 | 0 | 0 |
| 7446 | Pig | Central | 0 | 0 | 0 | 0 | 0 | 0 |
| 7447 | Pig | Central | 0 | 0 | 0 | 1 | 0 | 1 |
| 7448 | Pig | Central | 0 | 0 | 0 | 0 | 0 | 0 |
| 7449 | Pig | Central | 0 | 0 | 0 | 0 | 0 | 0 |
| 7450 | Pig | Central | 0 | 0 | 0 | 0 | 0 | 0 |
| 7451 | Pig | Central | 0 | 0 | 0 | 1 | 0 | 1 |
| 7452 | Pig | Central | 0 | 0 | 0 | 0 | 0 | 0 |
| 7453 | Pig | Central | 0 | 0 | 0 | 1 | 0 | 1 |
| 7454 | Pig | Central | 0 | 0 | 0 | 1 | 0 | 1 |
| 7455 | Pig | Central | 0 | 0 | 0 | 0 | 0 | 0 |
| 7456 | Pig | Central | 0 | 0 | 0 | 1 | 0 | 1 |
| 7457 | Pig | Central | 0 | 0 | 0 | 1 | 0 | 1 |
| 7458 | Pig | Central | 0 | 0 | 0 | 0 | 0 | 0 |
| 7459 | Pig | Central | 0 | 0 | 0 | 0 | 0 | 0 |
| 7460 | Pig | Central | 0 | 0 | 0 | 1 | 0 | 1 |
| 7461 | Pig | Central | 0 | 0 | 1 | 1 | 0 | 1 |
| 7462 | Pig | Central | 0 | 0 | 0 | 0 | 0 | 0 |
| 7463 | Pig | Central | 0 | 0 | 0 | 1 | 0 | 1 |
| 7464 | Pig | Central | 0 | 0 | 0 | 0 | 0 | 0 |
| 7465 | Pig | Central | 1 | 0 | 1 | 1 | 0 | 1 |
| 7466 | Pig | Central | 0 | 0 | 0 | 0 | 0 | 0 |
| 7467 | Pig | Central | 0 | 0 | 0 | 1 | 0 | 1 |
| 7468 | Pig | Central | 0 | 0 | 0 | 1 | 0 | 1 |
| 7469 | Pig | Central | 0 | 0 | 0 | 1 | 0 | 1 |
| 7470 | Pig | Central | 0 | 0 | 0 | 0 | 0 | 0 |
| 7471 | Pig | Central | 0 | 0 | 0 | 0 | 0 | 0 |
| 7472 | Pig | Central | 0 | 0 | 1 | 1 | 0 | 1 |
| 7473 | Pig | Central | 0 | 0 | 0 | 1 | 0 | 1 |
| 7474 | Pig | Central | 0 | 0 | 0 | 0 | 0 | 0 |
| 7475 | Pig | Central | 0 | 0 | 0 | 0 | 0 | 0 |
| 7476 | Pig | Central | 0 | 0 | 1 | 1 | 0 | 1 |
| 7477 | Pig | Central | 0 | 0 | 0 | 1 | 0 | 1 |
| 7478 | Pig | Central | 0 | 0 | 0 | 1 | 0 | 1 |
| 7479 | Pig | Central | 0 | 0 | 0 | 1 | 0 | 1 |
| 7480 | Pig | Central | 0 | 0 | 0 | 1 | 0 | 1 |
| 7481 | Pig | Central | 0 | 0 | 1 | 1 | 0 | 1 |
| 7482 | Pig | Central | 0 | 0 | 1 | 1 | 0 | 1 |
| 7483 | Pig | Central | 0 | 0 | 0 | 0 | 0 | 0 |
| 7484 | Pig | Central | 0 | 0 | 0 | 0 | 0 | 0 |
| 7485 | Pig | Central | 0 | 0 | 0 | 0 | 0 | 0 |
| 7486 | Pig | Central | 0 | 0 | 0 | 0 | 0 | 0 |
| 7487 | Pig | Central | 0 | 0 | 0 | 1 | 0 | 1 |

|      |     |         |   |   |   |   |   |   |
|------|-----|---------|---|---|---|---|---|---|
| 7488 | Pig | Central | 0 | 0 | 0 | 1 | 0 | 1 |
| 7489 | Pig | Central | 0 | 0 | 0 | 1 | 0 | 1 |
| 7490 | Pig | Central | 0 | 0 | 0 | 0 | 0 | 0 |
| 7491 | Pig | Central | 0 | 0 | 1 | 1 | 0 | 1 |
| 7492 | Pig | Central | 0 | 0 | 1 | 1 | 0 | 1 |
| 7493 | Pig | Central | 0 | 0 | 1 | 1 | 0 | 1 |
| 7494 | Pig | Central | 0 | 0 | 1 | 1 | 0 | 1 |
| 7495 | Pig | Central | 0 | 0 | 0 | 1 | 0 | 1 |
| 7496 | Pig | Central | 0 | 0 | 0 | 1 | 0 | 1 |
| 7497 | Pig | Central | 0 | 0 | 0 | 1 | 0 | 1 |
| 7498 | Pig | Central | 0 | 0 | 1 | 1 | 0 | 1 |
| 7499 | Pig | Central | 0 | 0 | 0 | 0 | 0 | 0 |
| 7500 | Pig | Central | 0 | 0 | 0 | 0 | 0 | 0 |
| 7501 | Pig | Central | 0 | 0 | 0 | 0 | 0 | 0 |
| 7502 | Pig | Central | 0 | 0 | 0 | 0 | 0 | 0 |
| 7503 | Pig | Central | 0 | 0 | 0 | 0 | 0 | 0 |
| 7504 | Pig | Central | 0 | 0 | 0 | 0 | 0 | 0 |
| 7505 | Pig | Central | 0 | 0 | 0 | 0 | 0 | 0 |
| 7506 | Pig | Central | 0 | 0 | 1 | 1 | 0 | 1 |
| 7507 | Pig | Central | 0 | 0 | 0 | 0 | 0 | 0 |
| 7508 | Pig | Central | 0 | 0 | 1 | 1 | 0 | 1 |
| 7509 | Pig | Central | 0 | 0 | 0 | 1 | 0 | 1 |
| 7510 | Pig | Central | 0 | 0 | 1 | 1 | 0 | 1 |
| 7511 | Pig | Central | 0 | 0 | 1 | 1 | 0 | 1 |
| 7512 | Pig | Central | 0 | 0 | 1 | 1 | 0 | 1 |
| 7513 | Pig | Central | 0 | 0 | 1 | 1 | 0 | 1 |
| 7514 | Pig | Central | 0 | 0 | 0 | 0 | 0 | 0 |
| 7515 | Pig | Central | 0 | 0 | 1 | 1 | 0 | 1 |
| 7516 | Pig | Central | 0 | 0 | 0 | 0 | 0 | 0 |
| 7517 | Pig | Central | 0 | 0 | 0 | 1 | 0 | 1 |
| 7518 | Pig | Central | 0 | 0 | 1 | 1 | 0 | 1 |
| 7519 | Pig | Central | 0 | 0 | 1 | 1 | 0 | 1 |
| 7520 | Pig | Central | 0 | 0 | 1 | 0 | 0 | 1 |
| 7521 | Pig | Central | 0 | 0 | 1 | 1 | 0 | 1 |
| 7522 | Pig | Central | 0 | 0 | 0 | 0 | 0 | 0 |
| 7523 | Pig | Central | 0 | 0 | 0 | 0 | 0 | 0 |
| 7524 | Pig | Central | 0 | 0 | 0 | 0 | 0 | 0 |
| 7525 | Pig | Central | 0 | 0 | 0 | 1 | 0 | 1 |
| 7526 | Pig | Central | 0 | 0 | 1 | 1 | 0 | 1 |
| 7527 | Pig | Central | 0 | 0 | 0 | 1 | 0 | 1 |
| 7528 | Pig | Central | 0 | 0 | 0 | 1 | 0 | 1 |
| 7529 | Pig | Central | 0 | 0 | 0 | 0 | 0 | 0 |
| 7530 | Pig | Central | 0 | 0 | 0 | 0 | 0 | 0 |
| 7531 | Pig | Central | 0 | 0 | 0 | 1 | 0 | 1 |
| 7532 | Pig | Central | 0 | 0 | 0 | 0 | 0 | 0 |
| 7533 | Pig | Central | 0 | 0 | 0 | 0 | 0 | 0 |
| 7534 | Pig | Central | 0 | 0 | 0 | 1 | 0 | 1 |
| 7535 | Pig | Central | 0 | 0 | 0 | 0 | 0 | 0 |

|      |     |         |   |   |   |   |   |   |
|------|-----|---------|---|---|---|---|---|---|
| 7536 | Pig | Central | 0 | 0 | 0 | 1 | 0 | 1 |
| 7537 | Pig | Central | 0 | 0 | 0 | 1 | 0 | 1 |
| 7538 | Pig | Central | 0 | 0 | 0 | 1 | 0 | 1 |
| 7539 | Pig | Central | 0 | 0 | 0 | 0 | 0 | 0 |
| 7540 | Pig | Central | 0 | 0 | 0 | 0 | 0 | 0 |
| 7541 | Pig | Central | 0 | 0 | 0 | 1 | 0 | 1 |
| 7542 | Pig | Central | 0 | 0 | 0 | 0 | 0 | 0 |
| 7543 | Pig | Central | 0 | 0 | 0 | 0 | 0 | 0 |
| 7544 | Pig | Central | 0 | 0 | 0 | 0 | 0 | 0 |
| 7545 | Pig | Central | 0 | 0 | 0 | 0 | 0 | 0 |
| 7546 | Pig | Central | 0 | 0 | 0 | 0 | 0 | 0 |
| 7547 | Pig | Central | 0 | 0 | 0 | 0 | 0 | 1 |
| 7548 | Pig | Central | 0 | 0 | 0 | 0 | 0 | 0 |
| 7549 | Pig | Central | 0 | 0 | 0 | 0 | 0 | 0 |
| 7550 | Pig | Central | 0 | 0 | 0 | 0 | 0 | 0 |
| 7551 | Pig | Central | 0 | 0 | 0 | 1 | 0 | 1 |
| 7552 | Pig | Central | 0 | 0 | 0 | 0 | 0 | 0 |
| 7553 | Pig | Central | 0 | 0 | 0 | 0 | 0 | 0 |
| 7554 | Pig | Central | 0 | 0 | 0 | 0 | 0 | 0 |
| 7555 | Pig | Central | 0 | 0 | 0 | 0 | 0 | 0 |
| 7556 | Pig | Central | 0 | 0 | 0 | 0 | 0 | 0 |
| 7557 | Pig | Central | 0 | 0 | 1 | 1 | 0 | 1 |
| 7558 | Pig | Central | 0 | 0 | 0 | 0 | 0 | 0 |
| 7559 | Pig | Central | 0 | 0 | 1 | 1 | 0 | 1 |
| 7560 | Pig | Central | 0 | 0 | 0 | 1 | 0 | 1 |
| 7561 | Pig | Central | 0 | 0 | 0 | 1 | 0 | 1 |
| 7562 | Pig | Central | 0 | 0 | 1 | 1 | 0 | 1 |
| 7563 | Pig | Central | 0 | 0 | 0 | 1 | 0 | 1 |
| 7564 | Pig | Central | 0 | 0 | 0 | 1 | 0 | 1 |
| 7565 | Pig | Central | 0 | 0 | 0 | 0 | 0 | 0 |
| 7566 | Pig | Central | 0 | 0 | 0 | 0 | 0 | 0 |
| 7567 | Pig | Central | 0 | 0 | 0 | 1 | 0 | 1 |
| 7568 | Pig | Central | 0 | 0 | 0 | 0 | 0 | 0 |
| 7569 | Pig | Central | 0 | 0 | 0 | 0 | 0 | 0 |
| 7570 | Pig | Central | 0 | 0 | 0 | 0 | 0 | 0 |
| 7571 | Pig | Central | 0 | 0 | 0 | 0 | 0 | 0 |
| 7572 | Pig | Central | 0 | 0 | 0 | 0 | 0 | 0 |
| 7573 | Pig | Central | 0 | 0 | 0 | 0 | 0 | 0 |
| 7574 | Pig | Central | 0 | 0 | 0 | 1 | 0 | 1 |
| 7575 | Pig | Central | 0 | 0 | 0 | 1 | 0 | 1 |
| 7576 | Pig | Central | 0 | 0 | 0 | 0 | 0 | 0 |
| 7577 | Pig | Central | 0 | 0 | 0 | 1 | 0 | 1 |
| 7578 | Pig | Central | 0 | 0 | 0 | 0 | 0 | 0 |
| 7579 | Pig | Central | 0 | 0 | 0 | 1 | 0 | 1 |
| 7580 | Pig | Central | 0 | 0 | 0 | 1 | 0 | 1 |
| 7581 | Pig | Central | 0 | 0 | 0 | 1 | 0 | 1 |
| 7582 | Pig | Central | 0 | 0 | 0 | 1 | 0 | 1 |
| 7583 | Pig | Central | 0 | 0 | 0 | 0 | 0 | 0 |

|      |     |         |   |   |   |   |   |   |
|------|-----|---------|---|---|---|---|---|---|
| 7584 | Pig | Central | 0 | 0 | 1 | 1 | 0 | 1 |
| 7585 | Pig | Central | 0 | 0 | 0 | 0 | 0 | 0 |
| 7586 | Pig | Central | 0 | 0 | 0 | 0 | 0 | 0 |
| 7587 | Pig | Central | 0 | 0 | 0 | 0 | 0 | 0 |
| 7588 | Pig | Central | 0 | 0 | 0 | 0 | 0 | 0 |
| 7589 | Pig | Central | 0 | 0 | 0 | 0 | 0 | 0 |
| 7590 | Pig | Central | 0 | 0 | 0 | 1 | 0 | 1 |
| 7591 | Pig | Central | 0 | 0 | 0 | 0 | 0 | 0 |
| 7592 | Pig | Central | 0 | 0 | 0 | 0 | 0 | 0 |
| 7593 | Pig | Central | 0 | 0 | 0 | 1 | 0 | 1 |
| 7594 | Pig | Central | 0 | 0 | 0 | 0 | 0 | 0 |
| 7595 | Pig | Central | 0 | 0 | 0 | 0 | 0 | 0 |
| 7596 | Pig | Central | 0 | 0 | 0 | 0 | 0 | 0 |
| 7597 | Pig | Central | 0 | 0 | 0 | 0 | 0 | 0 |
| 7598 | Pig | Central | 0 | 0 | 1 | 1 | 0 | 1 |
| 7599 | Pig | Central | 0 | 0 | 0 | 0 | 0 | 0 |
| 7600 | Pig | Central | 0 | 0 | 0 | 1 | 0 | 1 |
| 7601 | Pig | Central | 0 | 0 | 0 | 0 | 0 | 0 |
| 7602 | Pig | Central | 0 | 0 | 0 | 0 | 0 | 0 |
| 7603 | Pig | Central | 0 | 0 | 0 | 0 | 0 | 0 |
| 7604 | Pig | Central | 0 | 0 | 0 | 0 | 0 | 0 |
| 7605 | Pig | Central | 0 | 0 | 0 | 0 | 0 | 0 |
| 7606 | Pig | Central | 0 | 0 | 0 | 0 | 0 | 0 |
| 7607 | Pig | Central | 0 | 0 | 0 | 0 | 0 | 0 |
| 7608 | Pig | Central | 0 | 0 | 0 | 0 | 0 | 0 |
| 7609 | Pig | Central | 0 | 0 | 0 | 0 | 0 | 0 |
| 7610 | Pig | Central | 0 | 0 | 0 | 0 | 0 | 0 |
| 7611 | Pig | Central | 0 | 0 | 0 | 0 | 0 | 0 |
| 7612 | Pig | Central | 0 | 0 | 0 | 0 | 0 | 0 |
| 7613 | Pig | Central | 0 | 0 | 0 | 0 | 0 | 0 |
| 7614 | Pig | Central | 0 | 0 | 0 | 0 | 0 | 0 |
| 7615 | Pig | Central | 0 | 0 | 0 | 0 | 0 | 0 |
| 7616 | Pig | Central | 0 | 0 | 0 | 0 | 0 | 0 |
| 7617 | Pig | Central | 0 | 0 | 0 | 0 | 0 | 0 |
| 7618 | Pig | Central | 0 | 0 | 0 | 1 | 0 | 1 |
| 7619 | Pig | Central | 0 | 0 | 0 | 1 | 0 | 1 |
| 7620 | Pig | Central | 0 | 0 | 0 | 1 | 0 | 1 |
| 7621 | Pig | Central | 0 | 0 | 0 | 0 | 0 | 0 |
| 7622 | Pig | Central | 0 | 0 | 0 | 1 | 0 | 1 |
| 7623 | Pig | Central | 0 | 0 | 0 | 0 | 0 | 0 |
| 7624 | Pig | Central | 0 | 0 | 1 | 1 | 0 | 1 |
| 7625 | Pig | Central | 0 | 0 | 0 | 0 | 0 | 0 |
| 7626 | Pig | Central | 0 | 0 | 0 | 0 | 0 | 0 |
| 7627 | Pig | Central | 0 | 0 | 0 | 1 | 0 | 1 |
| 7628 | Pig | Central | 0 | 0 | 0 | 0 | 0 | 0 |
| 7629 | Pig | Central | 0 | 0 | 0 | 0 | 0 | 0 |
| 7630 | Pig | Central | 0 | 0 | 0 | 1 | 0 | 1 |
| 7631 | Pig | Central | 0 | 0 | 0 | 1 | 0 | 1 |

|      |     |         |   |   |   |   |   |   |
|------|-----|---------|---|---|---|---|---|---|
| 7632 | Pig | Central | 0 | 0 | 0 | 1 | 0 | 1 |
| 7633 | Pig | Central | 0 | 0 | 0 | 0 | 0 | 0 |
| 7634 | Pig | Central | 0 | 0 | 1 | 1 | 0 | 1 |
| 7635 | Pig | Central | 0 | 0 | 0 | 0 | 0 | 0 |
| 7636 | Pig | Central | 0 | 0 | 0 | 0 | 0 | 0 |
| 7637 | Pig | Central | 0 | 0 | 0 | 1 | 0 | 1 |
| 7638 | Pig | Central | 0 | 0 | 0 | 1 | 0 | 1 |
| 7639 | Pig | Central | 0 | 0 | 0 | 1 | 0 | 1 |
| 7640 | Pig | Central | 0 | 0 | 0 | 1 | 0 | 1 |
| 7641 | Pig | Central | 0 | 0 | 0 | 0 | 0 | 0 |
| 7642 | Pig | Central | 0 | 0 | 0 | 0 | 0 | 0 |
| 7643 | Pig | Central | 0 | 0 | 0 | 0 | 0 | 0 |
| 7644 | Pig | Central | 0 | 0 | 0 | 0 | 0 | 0 |
| 7645 | Pig | Central | 0 | 0 | 0 | 0 | 0 | 0 |
| 7646 | Pig | Central | 0 | 0 | 0 | 0 | 0 | 0 |
| 7647 | Pig | Central | 0 | 0 | 0 | 0 | 0 | 0 |
| 7648 | Pig | Central | 0 | 0 | 0 | 1 | 0 | 1 |
| 7649 | Pig | Central | 0 | 0 | 0 | 0 | 0 | 0 |
| 7650 | Pig | Central | 0 | 0 | 0 | 0 | 0 | 0 |
| 7651 | Pig | Central | 0 | 0 | 0 | 0 | 0 | 0 |
| 7652 | Pig | Central | 0 | 0 | 0 | 0 | 0 | 0 |
| 7653 | Pig | Central | 0 | 0 | 0 | 0 | 0 | 0 |
| 7654 | Pig | Central | 0 | 0 | 0 | 0 | 0 | 0 |
| 7655 | Pig | Central | 0 | 0 | 0 | 0 | 0 | 0 |
| 7656 | Pig | Central | 0 | 0 | 0 | 0 | 0 | 0 |
| 7657 | Pig | Central | 0 | 0 | 0 | 0 | 0 | 0 |
| 7658 | Pig | Central | 0 | 0 | 0 | 1 | 0 | 1 |
| 7659 | Pig | Central | 0 | 0 | 0 | 1 | 0 | 1 |
| 7660 | Pig | Central | 0 | 0 | 1 | 1 | 0 | 1 |
| 7661 | Pig | Central | 0 | 0 | 0 | 1 | 0 | 1 |
| 7662 | Pig | Central | 0 | 0 | 0 | 0 | 0 | 0 |
| 7663 | Pig | Central | 0 | 0 | 0 | 0 | 0 | 0 |
| 7664 | Pig | Central | 0 | 0 | 1 | 0 | 0 | 1 |
| 7665 | Pig | Central | 0 | 1 | 1 | 0 | 0 | 1 |
| 7666 | Pig | Central | 0 | 0 | 0 | 0 | 0 | 0 |
| 7667 | Pig | Central | 1 | 0 | 1 | 0 | 0 | 1 |
| 7668 | Pig | Central | 0 | 0 | 1 | 0 | 0 | 1 |
| 7669 | Pig | Central | 0 | 0 | 1 | 0 | 0 | 1 |
| 7670 | Pig | Central | 0 | 0 | 0 | 0 | 0 | 0 |
| 7671 | Pig | Central | 0 | 0 | 0 | 0 | 0 | 0 |
| 7672 | Pig | Central | 0 | 0 | 0 | 0 | 0 | 0 |
| 7673 | Pig | Central | 0 | 0 | 0 | 0 | 0 | 0 |
| 7674 | Pig | Central | 0 | 0 | 0 | 0 | 0 | 0 |
| 7675 | Pig | Central | 0 | 0 | 0 | 0 | 0 | 0 |
| 7676 | Pig | Central | 0 | 0 | 0 | 0 | 0 | 0 |
| 7677 | Pig | Central | 0 | 0 | 0 | 0 | 0 | 0 |
| 7678 | Pig | Central | 0 | 0 | 0 | 0 | 0 | 0 |
| 7679 | Pig | Central | 0 | 0 | 0 | 0 | 0 | 0 |



|      |     |          |   |   |   |   |   |   |
|------|-----|----------|---|---|---|---|---|---|
| 7680 | Pig | Central  | 0 | 0 | 0 | 0 | 0 | 0 |
| 7681 | Pig | Central  | 0 | 0 | 0 | 0 | 0 | 0 |
| 7682 | Pig | Central  | 0 | 0 | 0 | 0 | 0 | 0 |
| 7683 | Pig | Central  | 0 | 0 | 0 | 0 | 0 | 0 |
| 7684 | Pig | Central  | 0 | 0 | 0 | 0 | 0 | 0 |
| 7685 | Pig | Central  | 0 | 0 | 0 | 0 | 0 | 0 |
| 7686 | Pig | Southern | 1 | 0 | 0 | 0 | 0 | 1 |
| 7687 | Pig | Southern | 1 | 0 | 1 | 1 | 0 | 1 |
| 7688 | Pig | Southern | 0 | 0 | 1 | 1 | 0 | 1 |
| 7689 | Pig | Southern | 0 | 0 | 0 | 1 | 0 | 1 |
| 7690 | Pig | Southern | 0 | 0 | 0 | 0 | 0 | 0 |
| 7691 | Pig | Southern | 0 | 0 | 0 | 1 | 0 | 1 |
| 7692 | Pig | Southern | 0 | 0 | 0 | 0 | 0 | 0 |
| 7693 | Pig | Southern | 0 | 0 | 1 | 0 | 0 | 1 |
| 7694 | Pig | Southern | 0 | 0 | 1 | 0 | 0 | 1 |
| 7695 | Pig | Southern | 0 | 0 | 0 | 0 | 0 | 0 |
| 7696 | Pig | Southern | 0 | 0 | 1 | 1 | 0 | 1 |
| 7697 | Pig | Southern | 0 | 0 | 1 | 1 | 0 | 1 |
| 7698 | Pig | Southern | 0 | 0 | 1 | 1 | 0 | 1 |
| 7699 | Pig | Southern | 0 | 0 | 0 | 0 | 0 | 0 |
| 7700 | Pig | Southern | 0 | 0 | 1 | 1 | 0 | 1 |
| 7701 | Pig | Southern | 0 | 0 | 1 | 1 | 0 | 1 |
| 7702 | Pig | Southern | 0 | 0 | 1 | 1 | 0 | 1 |
| 7703 | Pig | Southern | 0 | 0 | 0 | 0 | 0 | 0 |
| 7704 | Pig | Southern | 0 | 0 | 0 | 0 | 0 | 0 |
| 7705 | Pig | Southern | 0 | 0 | 0 | 0 | 0 | 0 |
| 7706 | Pig | Southern | 0 | 0 | 0 | 1 | 0 | 1 |
| 7707 | Pig | Southern | 0 | 0 | 0 | 1 | 0 | 1 |
| 7708 | Pig | Southern | 0 | 0 | 0 | 0 | 0 | 0 |
| 7709 | Pig | Southern | 1 | 0 | 0 | 0 | 0 | 1 |
| 7710 | Pig | Southern | 0 | 0 | 0 | 0 | 0 | 0 |
| 7711 | Pig | Southern | 0 | 0 | 0 | 1 | 0 | 1 |
| 7712 | Pig | Southern | 0 | 0 | 0 | 1 | 0 | 1 |
| 7713 | Pig | Southern | 0 | 0 | 1 | 1 | 0 | 1 |
| 7714 | Pig | Southern | 1 | 0 | 1 | 1 | 0 | 1 |
| 7715 | Pig | Southern | 0 | 0 | 0 | 1 | 0 | 1 |
| 7716 | Pig | Southern | 0 | 0 | 0 | 0 | 0 | 0 |
| 7717 | Pig | Southern | 0 | 0 | 1 | 1 | 0 | 1 |
| 7718 | Pig | Southern | 0 | 0 | 0 | 0 | 0 | 0 |
| 7719 | Pig | Southern | 0 | 0 | 0 | 0 | 0 | 0 |
| 7720 | Pig | Southern | 0 | 0 | 0 | 0 | 0 | 0 |
| 7721 | Pig | Southern | 0 | 0 | 0 | 0 | 0 | 0 |
| 7722 | Pig | Southern | 0 | 0 | 0 | 1 | 0 | 1 |
| 7723 | Pig | Southern | 0 | 0 | 0 | 0 | 0 | 0 |
| 7724 | Pig | Southern | 0 | 0 | 0 | 0 | 0 | 0 |
| 7725 | Pig | Southern | 0 | 0 | 0 | 0 | 0 | 0 |
| 7726 | Pig | Southern | 0 | 0 | 0 | 0 | 0 | 0 |
| 7727 | Pig | Southern | 0 | 0 | 0 | 0 | 0 | 0 |

|      |     |          |   |   |   |   |   |   |
|------|-----|----------|---|---|---|---|---|---|
| 7728 | Pig | Southern | 0 | 0 | 0 | 1 | 0 | 1 |
| 7729 | Pig | Southern | 1 | 0 | 1 | 1 | 0 | 1 |
| 7730 | Pig | Southern | 0 | 0 | 0 | 0 | 0 | 0 |
| 7731 | Pig | Southern | 0 | 0 | 0 | 0 | 0 | 0 |
| 7732 | Pig | Southern | 0 | 0 | 0 | 0 | 0 | 0 |
| 7733 | Pig | Southern | 0 | 0 | 0 | 0 | 0 | 0 |
| 7734 | Pig | Southern | 0 | 0 | 0 | 1 | 0 | 1 |
| 7735 | Pig | Southern | 0 | 0 | 0 | 0 | 0 | 0 |
| 7736 | Pig | Southern | 0 | 0 | 0 | 0 | 0 | 0 |
| 7737 | Pig | Southern | 0 | 0 | 0 | 0 | 0 | 0 |
| 7738 | Pig | Southern | 0 | 0 | 0 | 0 | 0 | 0 |
| 7739 | Pig | Southern | 0 | 0 | 0 | 0 | 0 | 0 |
| 7740 | Pig | Southern | 0 | 0 | 0 | 0 | 0 | 0 |
| 7741 | Pig | Southern | 0 | 0 | 0 | 0 | 0 | 0 |
| 7742 | Pig | Southern | 0 | 0 | 0 | 0 | 0 | 0 |
| 7743 | Pig | Southern | 0 | 0 | 0 | 0 | 0 | 0 |
| 7744 | Pig | Southern | 0 | 0 | 0 | 0 | 0 | 0 |
| 7745 | Pig | Southern | 0 | 0 | 0 | 0 | 0 | 0 |
| 7746 | Pig | Southern | 0 | 0 | 1 | 1 | 0 | 1 |
| 7747 | Pig | Southern | 0 | 0 | 0 | 0 | 0 | 0 |
| 7748 | Pig | Southern | 0 | 0 | 0 | 0 | 0 | 0 |
| 7749 | Pig | Southern | 0 | 0 | 0 | 1 | 0 | 1 |
| 7750 | Pig | Southern | 0 | 0 | 0 | 1 | 0 | 1 |
| 7751 | Pig | Southern | 0 | 0 | 0 | 0 | 0 | 0 |
| 7752 | Pig | Southern | 0 | 0 | 0 | 0 | 0 | 0 |
| 7753 | Pig | Southern | 0 | 0 | 0 | 1 | 0 | 1 |
| 7754 | Pig | Southern | 0 | 0 | 0 | 0 | 0 | 0 |
| 7755 | Pig | Southern | 0 | 0 | 0 | 0 | 0 | 0 |
| 7756 | Pig | Southern | 0 | 0 | 0 | 0 | 0 | 0 |
| 7757 | Pig | Southern | 0 | 0 | 0 | 0 | 0 | 0 |
| 7758 | Pig | Southern | 0 | 0 | 0 | 0 | 0 | 0 |
| 7759 | Pig | Southern | 0 | 0 | 0 | 0 | 0 | 1 |
| 7760 | Pig | Southern | 0 | 0 | 0 | 0 | 0 | 0 |
| 7761 | Pig | Southern | 0 | 0 | 0 | 0 | 0 | 0 |
| 7762 | Pig | Southern | 0 | 0 | 0 | 0 | 0 | 0 |
| 7763 | Pig | Southern | 0 | 0 | 0 | 0 | 0 | 0 |
| 7764 | Pig | Southern | 0 | 0 | 0 | 0 | 0 | 0 |
| 7765 | Pig | Southern | 0 | 0 | 0 | 0 | 0 | 0 |
| 7766 | Pig | Southern | 0 | 0 | 0 | 0 | 0 | 0 |
| 7767 | Pig | Southern | 0 | 0 | 0 | 0 | 0 | 0 |
| 7768 | Pig | Southern | 0 | 0 | 0 | 0 | 0 | 0 |
| 7769 | Pig | Southern | 0 | 0 | 0 | 0 | 0 | 0 |
| 7770 | Pig | Southern | 0 | 0 | 0 | 0 | 0 | 0 |
| 7771 | Pig | Southern | 0 | 0 | 0 | 0 | 0 | 0 |
| 7772 | Pig | Southern | 0 | 0 | 0 | 0 | 0 | 0 |
| 7773 | Pig | Southern | 0 | 0 | 0 | 0 | 0 | 0 |
| 7774 | Pig | Southern | 0 | 0 | 0 | 0 | 0 | 0 |
| 7775 | Pig | Southern | 1 | 0 | 0 | 0 | 0 | 1 |

|      |     |          |   |   |   |   |   |   |
|------|-----|----------|---|---|---|---|---|---|
| 7776 | Pig | Southern | 0 | 0 | 0 | 0 | 0 | 0 |
| 7777 | Pig | Southern | 0 | 0 | 0 | 0 | 0 | 0 |
| 7778 | Pig | Southern | 0 | 0 | 0 | 0 | 0 | 0 |
| 7779 | Pig | Southern | 0 | 0 | 0 | 0 | 0 | 0 |
| 7780 | Pig | Southern | 0 | 0 | 0 | 0 | 0 | 0 |
| 7781 | Pig | Southern | 0 | 0 | 0 | 0 | 0 | 0 |
| 7782 | Pig | Southern | 0 | 0 | 0 | 0 | 0 | 0 |
| 7783 | Pig | Southern | 0 | 0 | 0 | 0 | 0 | 0 |
| 7784 | Pig | Southern | 0 | 0 | 0 | 0 | 0 | 0 |
| 7785 | Pig | Southern | 0 | 0 | 0 | 0 | 0 | 0 |
| 7786 | Pig | Southern | 0 | 0 | 0 | 0 | 0 | 0 |
| 7787 | Pig | Southern | 0 | 0 | 0 | 0 | 0 | 0 |
| 7788 | Pig | Southern | 0 | 0 | 0 | 0 | 0 | 0 |
| 7789 | Pig | Southern | 0 | 0 | 0 | 0 | 0 | 0 |
| 7790 | Pig | Southern | 0 | 0 | 0 | 0 | 0 | 0 |
| 7791 | Pig | Southern | 0 | 0 | 0 | 0 | 0 | 0 |
| 7792 | Pig | Southern | 0 | 0 | 0 | 0 | 0 | 0 |
| 7793 | Pig | Southern | 0 | 0 | 0 | 0 | 0 | 0 |
| 7794 | Pig | Southern | 0 | 0 | 0 | 0 | 0 | 0 |
| 7795 | Pig | Southern | 0 | 0 | 0 | 0 | 0 | 0 |
| 7796 | Pig | Southern | 0 | 0 | 0 | 0 | 0 | 0 |
| 7797 | Pig | Southern | 0 | 0 | 0 | 0 | 0 | 0 |
| 7798 | Pig | Southern | 0 | 0 | 0 | 0 | 0 | 0 |
| 7799 | Pig | Southern | 0 | 0 | 0 | 0 | 0 | 0 |
| 7800 | Pig | Southern | 0 | 0 | 0 | 0 | 0 | 0 |
| 7801 | Pig | Southern | 0 | 0 | 0 | 0 | 0 | 0 |
| 7802 | Pig | Southern | 0 | 0 | 0 | 0 | 0 | 0 |
| 7803 | Pig | Southern | 0 | 0 | 1 | 1 | 0 | 1 |
| 7804 | Pig | Southern | 0 | 0 | 0 | 0 | 0 | 0 |
| 7805 | Pig | Southern | 0 | 0 | 0 | 0 | 0 | 0 |
| 7806 | Pig | Southern | 1 | 0 | 0 | 1 | 0 | 1 |
| 7807 | Pig | Southern | 0 | 0 | 0 | 0 | 0 | 0 |
| 7808 | Pig | Southern | 0 | 0 | 0 | 0 | 0 | 0 |
| 7809 | Pig | Southern | 0 | 0 | 0 | 0 | 0 | 0 |
| 7810 | Pig | Southern | 0 | 0 | 0 | 0 | 0 | 0 |
| 7811 | Pig | Southern | 0 | 0 | 0 | 0 | 0 | 0 |
| 7812 | Pig | Southern | 0 | 0 | 0 | 0 | 0 | 0 |
| 7813 | Pig | Southern | 0 | 0 | 0 | 0 | 0 | 0 |
| 7814 | Pig | Southern | 0 | 0 | 0 | 0 | 0 | 0 |
| 7815 | Pig | Southern | 0 | 0 | 0 | 0 | 0 | 0 |
| 7816 | Pig | Southern | 0 | 0 | 0 | 0 | 0 | 0 |
| 7817 | Pig | Southern | 0 | 0 | 0 | 1 | 0 | 1 |
| 7818 | Pig | Southern | 1 | 0 | 0 | 0 | 0 | 1 |
| 7819 | Pig | Southern | 0 | 0 | 0 | 0 | 0 | 0 |
| 7820 | Pig | Southern | 0 | 0 | 1 | 0 | 0 | 1 |
| 7821 | Pig | Southern | 0 | 0 | 0 | 0 | 0 | 0 |
| 7822 | Pig | Southern | 0 | 0 | 1 | 1 | 0 | 1 |
| 7823 | Pig | Southern | 0 | 0 | 0 | 0 | 0 | 0 |

|      |     |          |   |   |   |   |   |   |
|------|-----|----------|---|---|---|---|---|---|
| 7824 | Pig | Southern | 0 | 0 | 0 | 1 | 0 | 1 |
| 7825 | Pig | Eastern  | 0 | 0 | 0 | 0 | 0 | 0 |
| 7826 | Pig | Eastern  | 0 | 0 | 0 | 0 | 0 | 0 |
| 7827 | Pig | Eastern  | 0 | 0 | 0 | 0 | 0 | 0 |
| 7828 | Pig | Eastern  | 0 | 0 | 0 | 0 | 0 | 0 |
| 7829 | Pig | Eastern  | 0 | 0 | 0 | 0 | 0 | 0 |
| 7830 | Pig | Eastern  | 0 | 0 | 0 | 0 | 0 | 0 |
| 7831 | Pig | Eastern  | 0 | 0 | 0 | 0 | 0 | 0 |
| 7832 | Pig | Eastern  | 0 | 0 | 0 | 0 | 0 | 0 |
| 7833 | Pig | Eastern  | 0 | 0 | 0 | 0 | 0 | 0 |
| 7834 | Pig | Eastern  | 0 | 0 | 0 | 0 | 0 | 0 |
| 7835 | Pig | Eastern  | 0 | 0 | 0 | 0 | 0 | 0 |
| 7836 | Pig | Eastern  | 0 | 0 | 0 | 0 | 0 | 0 |
| 7837 | Pig | Eastern  | 0 | 0 | 0 | 0 | 0 | 0 |
| 7838 | Pig | Eastern  | 0 | 0 | 0 | 0 | 0 | 0 |
| 7839 | Pig | Eastern  | 0 | 0 | 0 | 0 | 0 | 0 |
| 7840 | Pig | Eastern  | 0 | 0 | 0 | 0 | 0 | 0 |
| 7841 | Pig | Eastern  | 0 | 0 | 0 | 0 | 0 | 0 |
| 7842 | Pig | Eastern  | 0 | 0 | 0 | 0 | 0 | 0 |
| 7843 | Pig | Eastern  | 0 | 0 | 0 | 0 | 0 | 0 |
| 7844 | Pig | Eastern  | 0 | 0 | 0 | 0 | 0 | 0 |
| 7845 | Pig | Eastern  | 0 | 0 | 0 | 0 | 0 | 0 |
| 7846 | Pig | Eastern  | 0 | 0 | 0 | 0 | 0 | 0 |
| 7847 | Pig | Eastern  | 0 | 0 | 0 | 0 | 0 | 0 |
| 7848 | Pig | Eastern  | 0 | 0 | 0 | 0 | 0 | 0 |
| 7849 | Pig | Eastern  | 0 | 0 | 0 | 0 | 0 | 0 |
| 7850 | Pig | Eastern  | 0 | 0 | 0 | 0 | 0 | 0 |
| 7851 | Pig | Eastern  | 0 | 0 | 0 | 0 | 0 | 0 |
| 7852 | Pig | Eastern  | 0 | 0 | 0 | 0 | 0 | 0 |
| 7853 | Pig | Eastern  | 0 | 0 | 0 | 0 | 0 | 0 |
| 7854 | Pig | Eastern  | 0 | 0 | 0 | 0 | 0 | 0 |
| 7855 | Pig | Eastern  | 0 | 0 | 0 | 0 | 0 | 0 |
| 7856 | Pig | Eastern  | 0 | 0 | 0 | 0 | 0 | 0 |
| 7857 | Pig | Eastern  | 0 | 0 | 0 | 0 | 0 | 0 |
| 7858 | Pig | Eastern  | 0 | 0 | 0 | 0 | 0 | 0 |
| 7859 | Pig | Eastern  | 0 | 0 | 0 | 0 | 0 | 0 |
| 7860 | Pig | Eastern  | 0 | 0 | 0 | 0 | 0 | 0 |
| 7861 | Pig | Eastern  | 0 | 0 | 0 | 0 | 0 | 0 |
| 7862 | Pig | Eastern  | 0 | 0 | 0 | 0 | 0 | 0 |
| 7863 | Pig | Eastern  | 0 | 0 | 0 | 0 | 0 | 0 |
| 7864 | Pig | Eastern  | 0 | 0 | 0 | 0 | 0 | 0 |
| 7865 | Pig | Eastern  | 0 | 0 | 0 | 0 | 0 | 0 |
| 7866 | Pig | Eastern  | 0 | 0 | 0 | 0 | 0 | 0 |
| 7867 | Pig | Eastern  | 0 | 0 | 0 | 0 | 0 | 0 |
| 7868 | Pig | Eastern  | 0 | 0 | 0 | 0 | 0 | 0 |
| 7869 | Pig | Eastern  | 0 | 0 | 0 | 0 | 0 | 0 |
| 7870 | Pig | Eastern  | 0 | 0 | 0 | 0 | 0 | 0 |
| 7871 | Pig | Eastern  | 0 | 0 | 0 | 0 | 0 | 0 |

|      |     |         |   |   |   |   |   |   |
|------|-----|---------|---|---|---|---|---|---|
| 7872 | Pig | Eastern | 0 | 0 | 0 | 0 | 0 | 0 |
| 7873 | Pig | Eastern | 0 | 0 | 0 | 0 | 0 | 0 |
| 7874 | Pig | Eastern | 0 | 0 | 0 | 0 | 0 | 0 |
| 7875 | Pig | Eastern | 0 | 0 | 0 | 0 | 0 | 0 |
| 7876 | Pig | Eastern | 0 | 0 | 0 | 0 | 0 | 0 |
| 7877 | Pig | Eastern | 0 | 0 | 0 | 0 | 0 | 0 |
| 7878 | Pig | Eastern | 0 | 0 | 0 | 0 | 0 | 0 |
| 7879 | Pig | Eastern | 0 | 0 | 0 | 0 | 0 | 0 |
| 7880 | Pig | Eastern | 0 | 0 | 0 | 0 | 0 | 0 |
| 7881 | Pig | Eastern | 0 | 0 | 0 | 0 | 0 | 0 |
| 7882 | Pig | Eastern | 0 | 0 | 0 | 0 | 0 | 0 |
| 7883 | Pig | Eastern | 0 | 0 | 0 | 0 | 0 | 0 |
| 7884 | Pig | Eastern | 0 | 0 | 0 | 0 | 0 | 0 |
| 7885 | Pig | Eastern | 0 | 0 | 0 | 0 | 0 | 0 |
| 7886 | Pig | Eastern | 0 | 0 | 0 | 0 | 0 | 0 |
| 7887 | Pig | Eastern | 0 | 0 | 0 | 0 | 0 | 0 |
| 7888 | Pig | Eastern | 0 | 0 | 0 | 0 | 0 | 0 |
| 7889 | Pig | Eastern | 0 | 0 | 0 | 0 | 0 | 0 |
| 7890 | Pig | Eastern | 0 | 0 | 0 | 0 | 0 | 0 |
| 7891 | Pig | Eastern | 0 | 0 | 0 | 0 | 0 | 0 |
| 7892 | Pig | Eastern | 0 | 0 | 0 | 0 | 0 | 0 |
| 7893 | Pig | Eastern | 0 | 0 | 0 | 0 | 0 | 0 |
| 7894 | Pig | Eastern | 0 | 0 | 0 | 0 | 0 | 0 |
| 7895 | Pig | Eastern | 0 | 0 | 0 | 0 | 0 | 0 |
| 7896 | Pig | Eastern | 0 | 0 | 0 | 0 | 0 | 0 |
| 7897 | Pig | Eastern | 0 | 0 | 0 | 0 | 0 | 0 |
| 7898 | Pig | Eastern | 0 | 0 | 0 | 0 | 0 | 0 |
| 7899 | Pig | Eastern | 0 | 0 | 0 | 0 | 0 | 0 |
| 7900 | Pig | Eastern | 0 | 0 | 0 | 0 | 0 | 0 |
| 7901 | Pig | Eastern | 0 | 0 | 0 | 0 | 0 | 0 |
| 7902 | Pig | Eastern | 0 | 0 | 0 | 0 | 0 | 0 |
| 7903 | Pig | Eastern | 0 | 0 | 0 | 0 | 0 | 0 |
| 7904 | Pig | Eastern | 0 | 0 | 0 | 0 | 0 | 0 |
| 7905 | Pig | Eastern | 0 | 0 | 0 | 0 | 0 | 0 |
| 7906 | Pig | Eastern | 0 | 0 | 0 | 0 | 0 | 0 |
| 7907 | Pig | Eastern | 0 | 0 | 0 | 0 | 0 | 0 |
| 7908 | Pig | Eastern | 0 | 0 | 0 | 0 | 0 | 0 |
| 7909 | Pig | Eastern | 0 | 0 | 0 | 0 | 0 | 0 |
| 7910 | Pig | Eastern | 0 | 0 | 0 | 0 | 0 | 0 |
| 7911 | Pig | Eastern | 0 | 0 | 0 | 0 | 0 | 0 |
| 7912 | Pig | Eastern | 0 | 0 | 0 | 0 | 0 | 0 |
| 7913 | Pig | Eastern | 0 | 0 | 0 | 0 | 0 | 0 |
| 7914 | Pig | Eastern | 0 | 0 | 0 | 0 | 0 | 0 |
| 7915 | Pig | Eastern | 0 | 0 | 0 | 0 | 0 | 0 |
| 7916 | Pig | Eastern | 0 | 0 | 0 | 0 | 0 | 0 |
| 7917 | Pig | Eastern | 0 | 0 | 0 | 0 | 0 | 0 |
| 7918 | Pig | Eastern | 0 | 0 | 0 | 0 | 0 | 0 |
| 7919 | Pig | Eastern | 0 | 0 | 0 | 0 | 0 | 0 |

|      |     |         |   |   |   |   |   |   |
|------|-----|---------|---|---|---|---|---|---|
| 7920 | Pig | Eastern | 0 | 0 | 0 | 0 | 0 | 0 |
| 7921 | Pig | Eastern | 0 | 0 | 0 | 0 | 0 | 0 |
| 7922 | Pig | Eastern | 0 | 0 | 0 | 0 | 0 | 0 |
| 7923 | Pig | Eastern | 0 | 0 | 0 | 0 | 0 | 0 |
| 7924 | Pig | Eastern | 0 | 0 | 0 | 0 | 0 | 0 |
| 7925 | Pig | Eastern | 0 | 0 | 0 | 0 | 0 | 0 |
| 7926 | Pig | Eastern | 0 | 0 | 0 | 0 | 0 | 0 |
| 7927 | Pig | Eastern | 0 | 0 | 0 | 0 | 0 | 0 |
| 7928 | Pig | Eastern | 0 | 0 | 0 | 0 | 0 | 0 |
| 7929 | Pig | Eastern | 0 | 0 | 0 | 0 | 0 | 0 |
| 7930 | Pig | Eastern | 0 | 0 | 0 | 0 | 0 | 0 |
| 7931 | Pig | Eastern | 0 | 0 | 0 | 0 | 0 | 0 |
| 7932 | Pig | Eastern | 0 | 0 | 0 | 0 | 0 | 0 |
| 7933 | Pig | Eastern | 0 | 0 | 0 | 0 | 0 | 0 |
| 7934 | Pig | Eastern | 0 | 0 | 0 | 0 | 0 | 0 |
| 7935 | Pig | Eastern | 0 | 0 | 0 | 0 | 0 | 0 |
| 7936 | Pig | Eastern | 0 | 0 | 0 | 0 | 0 | 0 |
| 7937 | Pig | Eastern | 0 | 0 | 0 | 0 | 0 | 0 |
| 7938 | Pig | Eastern | 0 | 0 | 0 | 0 | 0 | 0 |
| 7939 | Pig | Eastern | 0 | 0 | 0 | 0 | 0 | 0 |
| 7940 | Pig | Eastern | 0 | 0 | 0 | 0 | 0 | 0 |
| 7941 | Pig | Eastern | 0 | 0 | 0 | 0 | 0 | 0 |
| 7942 | Pig | Eastern | 0 | 0 | 0 | 0 | 0 | 0 |
| 7943 | Pig | Eastern | 0 | 0 | 0 | 0 | 0 | 0 |
| 7944 | Pig | Eastern | 0 | 0 | 0 | 0 | 0 | 0 |
| 7945 | Pig | Eastern | 0 | 0 | 0 | 0 | 0 | 0 |
| 7946 | Pig | Eastern | 0 | 0 | 0 | 0 | 0 | 0 |
| 7947 | Pig | Eastern | 0 | 0 | 0 | 0 | 0 | 0 |
| 7948 | Pig | Eastern | 0 | 0 | 0 | 0 | 0 | 0 |
| 7949 | Pig | Eastern | 0 | 0 | 0 | 0 | 0 | 0 |
| 7950 | Pig | Eastern | 0 | 0 | 0 | 0 | 0 | 0 |
| 7951 | Pig | Eastern | 0 | 0 | 0 | 0 | 0 | 0 |
| 7952 | Pig | Eastern | 0 | 0 | 0 | 0 | 0 | 0 |
| 7953 | Pig | Eastern | 0 | 0 | 0 | 0 | 0 | 0 |
| 7954 | Pig | Eastern | 0 | 0 | 0 | 0 | 0 | 0 |
| 7955 | Pig | Eastern | 0 | 0 | 0 | 0 | 0 | 0 |
| 7956 | Pig | Eastern | 0 | 0 | 0 | 0 | 0 | 0 |
| 7957 | Pig | Eastern | 0 | 0 | 0 | 0 | 0 | 0 |
| 7958 | Pig | Eastern | 0 | 0 | 0 | 0 | 0 | 0 |
| 7959 | Pig | Eastern | 0 | 0 | 0 | 0 | 0 | 0 |
| 7960 | Pig | Eastern | 0 | 0 | 0 | 0 | 0 | 0 |
| 7961 | Pig | Eastern | 0 | 0 | 0 | 0 | 0 | 0 |
| 7962 | Pig | Eastern | 0 | 0 | 0 | 0 | 0 | 0 |
| 7963 | Pig | Eastern | 0 | 0 | 0 | 0 | 0 | 0 |
| 7964 | Pig | Eastern | 0 | 0 | 0 | 0 | 0 | 0 |
| 7965 | Pig | Eastern | 0 | 0 | 0 | 0 | 0 | 0 |
| 7966 | Pig | Eastern | 0 | 0 | 0 | 0 | 0 | 0 |
| 7967 | Pig | Eastern | 0 | 0 | 0 | 0 | 0 | 0 |

|      |     |          |   |   |   |   |   |   |
|------|-----|----------|---|---|---|---|---|---|
| 7968 | Pig | Eastern  | 0 | 0 | 0 | 0 | 0 | 0 |
| 7969 | Pig | Eastern  | 0 | 0 | 0 | 0 | 0 | 0 |
| 7970 | Pig | Eastern  | 0 | 0 | 0 | 0 | 0 | 0 |
| 7971 | Pig | Eastern  | 0 | 0 | 0 | 0 | 0 | 0 |
| 7972 | Pig | Eastern  | 0 | 0 | 0 | 0 | 0 | 0 |
| 7973 | Pig | Eastern  | 0 | 0 | 0 | 0 | 0 | 0 |
| 7974 | Pig | Eastern  | 0 | 0 | 0 | 0 | 0 | 0 |
| 7975 | Pig | Eastern  | 0 | 0 | 0 | 0 | 0 | 0 |
| 7976 | Pig | Eastern  | 0 | 0 | 0 | 0 | 0 | 0 |
| 7977 | Pig | Eastern  | 0 | 0 | 0 | 0 | 0 | 0 |
| 7978 | Pig | Eastern  | 0 | 0 | 0 | 0 | 0 | 0 |
| 7979 | Pig | Eastern  | 0 | 0 | 0 | 0 | 0 | 0 |
| 7980 | Pig | Eastern  | 0 | 0 | 0 | 0 | 0 | 0 |
| 7981 | Pig | Eastern  | 0 | 0 | 0 | 0 | 0 | 0 |
| 7982 | Pig | Eastern  | 0 | 0 | 0 | 0 | 0 | 0 |
| 7983 | Pig | Eastern  | 0 | 0 | 0 | 0 | 0 | 0 |
| 7984 | Pig | Eastern  | 0 | 0 | 0 | 0 | 0 | 0 |
| 7985 | Pig | Eastern  | 0 | 0 | 0 | 0 | 0 | 0 |
| 7986 | Pig | Eastern  | 0 | 0 | 0 | 0 | 0 | 0 |
| 7987 | Pig | Eastern  | 0 | 0 | 0 | 0 | 0 | 0 |
| 7988 | Pig | Eastern  | 0 | 0 | 0 | 0 | 0 | 0 |
| 7989 | Pig | Eastern  | 0 | 0 | 0 | 0 | 0 | 0 |
| 7990 | Pig | Eastern  | 0 | 0 | 0 | 0 | 0 | 0 |
| 7991 | Pig | Eastern  | 0 | 0 | 0 | 0 | 0 | 0 |
| 7992 | Pig | Eastern  | 0 | 0 | 0 | 0 | 0 | 0 |
| 7993 | Pig | Eastern  | 0 | 0 | 0 | 0 | 0 | 0 |
| 7994 | Pig | Eastern  | 0 | 0 | 0 | 0 | 0 | 0 |
| 7995 | Pig | Eastern  | 0 | 0 | 0 | 0 | 0 | 0 |
| 7996 | Pig | Eastern  | 0 | 0 | 0 | 0 | 0 | 0 |
| 7997 | Pig | Eastern  | 0 | 0 | 0 | 0 | 0 | 0 |
| 7998 | Pig | Eastern  | 0 | 0 | 0 | 0 | 0 | 0 |
| 7999 | Pig | Eastern  | 0 | 0 | 0 | 0 | 0 | 0 |
| 8000 | Pig | Eastern  | 0 | 0 | 0 | 0 | 0 | 0 |
| 8001 | Pig | Eastern  | 0 | 0 | 0 | 0 | 0 | 0 |
| 8002 | Pig | Eastern  | 0 | 0 | 0 | 0 | 0 | 0 |
| 8003 | Pig | Eastern  | 0 | 0 | 0 | 0 | 0 | 0 |
| 8004 | Pig | Eastern  | 0 | 0 | 0 | 0 | 0 | 0 |
| 8005 | Pig | Southern | 1 | 0 | 0 | 0 | 0 | 1 |
| 8006 | Pig | Southern | 0 | 0 | 0 | 0 | 0 | 0 |
| 8007 | Pig | Southern | 0 | 0 | 0 | 0 | 0 | 0 |
| 8008 | Pig | Southern | 0 | 0 | 0 | 0 | 0 | 0 |
| 8009 | Pig | Southern | 0 | 0 | 0 | 0 | 0 | 0 |
| 8010 | Pig | Southern | 0 | 0 | 0 | 0 | 0 | 0 |
| 8011 | Pig | Southern | 0 | 0 | 0 | 0 | 0 | 0 |
| 8012 | Pig | Southern | 0 | 0 | 0 | 0 | 0 | 0 |
| 8013 | Pig | Southern | 0 | 0 | 0 | 0 | 0 | 0 |
| 8014 | Pig | Southern | 0 | 0 | 1 | 1 | 0 | 1 |
| 8015 | Pig | Southern | 0 | 0 | 1 | 0 | 0 | 1 |

|      |     |          |   |   |   |   |   |   |
|------|-----|----------|---|---|---|---|---|---|
| 8016 | Pig | Southern | 0 | 0 | 0 | 0 | 0 | 0 |
| 8017 | Pig | Eastern  | 0 | 0 | 0 | 0 | 0 | 0 |
| 8018 | Pig | Eastern  | 0 | 0 | 0 | 0 | 0 | 0 |
| 8019 | Pig | Eastern  | 0 | 0 | 0 | 0 | 0 | 0 |
| 8020 | Pig | Eastern  | 0 | 0 | 0 | 0 | 0 | 0 |
| 8021 | Pig | Eastern  | 0 | 0 | 0 | 0 | 0 | 0 |
| 8022 | Pig | Eastern  | 0 | 0 | 0 | 0 | 0 | 0 |
| 8023 | Pig | Eastern  | 0 | 0 | 0 | 0 | 0 | 0 |
| 8024 | Pig | Eastern  | 0 | 0 | 0 | 0 | 0 | 0 |
| 8025 | Pig | Eastern  | 0 | 0 | 0 | 0 | 0 | 0 |
| 8026 | Pig | Eastern  | 0 | 0 | 0 | 0 | 0 | 0 |
| 8027 | Pig | Eastern  | 0 | 0 | 0 | 0 | 0 | 0 |
| 8028 | Pig | Eastern  | 0 | 0 | 0 | 0 | 0 | 0 |
| 8029 | Pig | Eastern  | 0 | 0 | 0 | 0 | 0 | 0 |
| 8030 | Pig | Eastern  | 0 | 0 | 0 | 0 | 0 | 0 |
| 8031 | Pig | Eastern  | 0 | 0 | 0 | 0 | 0 | 0 |
| 8032 | Pig | Eastern  | 0 | 0 | 0 | 0 | 0 | 0 |
| 8033 | Pig | Eastern  | 0 | 0 | 0 | 0 | 0 | 0 |
| 8034 | Pig | Eastern  | 0 | 0 | 0 | 0 | 0 | 0 |
| 8035 | Pig | Eastern  | 0 | 0 | 0 | 0 | 0 | 0 |
| 8036 | Pig | Eastern  | 0 | 0 | 0 | 0 | 0 | 0 |
| 8037 | Pig | Eastern  | 0 | 0 | 0 | 0 | 0 | 0 |
| 8038 | Pig | Eastern  | 0 | 0 | 0 | 0 | 0 | 0 |
| 8039 | Pig | Eastern  | 0 | 0 | 0 | 0 | 0 | 0 |
| 8040 | Pig | Eastern  | 0 | 0 | 0 | 0 | 0 | 0 |
| 8041 | Pig | Eastern  | 0 | 0 | 0 | 0 | 0 | 0 |
| 8042 | Pig | Eastern  | 0 | 0 | 0 | 0 | 0 | 0 |
| 8043 | Pig | Eastern  | 0 | 0 | 0 | 0 | 0 | 0 |
| 8044 | Pig | Eastern  | 0 | 0 | 0 | 0 | 0 | 0 |
| 8045 | Pig | Eastern  | 0 | 0 | 0 | 0 | 0 | 0 |
| 8046 | Pig | Eastern  | 0 | 0 | 0 | 0 | 0 | 0 |
| 8047 | Pig | Central  | 0 | 0 | 0 | 0 | 0 | 0 |
| 8048 | Pig | Central  | 0 | 0 | 0 | 0 | 0 | 0 |
| 8049 | Pig | Central  | 0 | 0 | 0 | 0 | 0 | 0 |
| 8050 | Pig | Central  | 0 | 0 | 0 | 0 | 0 | 0 |
| 8051 | Pig | Central  | 0 | 0 | 0 | 0 | 0 | 0 |
| 8052 | Pig | Central  | 0 | 0 | 0 | 0 | 0 | 0 |
| 8053 | Pig | Central  | 0 | 0 | 0 | 0 | 0 | 0 |
| 8054 | Pig | Central  | 0 | 0 | 0 | 0 | 0 | 0 |
| 8055 | Pig | Central  | 0 | 0 | 0 | 0 | 0 | 0 |
| 8056 | Pig | Central  | 0 | 0 | 0 | 0 | 0 | 0 |
| 8057 | Pig | Central  | 0 | 0 | 0 | 0 | 0 | 0 |
| 8058 | Pig | Central  | 0 | 0 | 0 | 0 | 0 | 0 |
| 8059 | Pig | Central  | 0 | 0 | 0 | 0 | 0 | 0 |
| 8060 | Pig | Central  | 0 | 0 | 0 | 0 | 0 | 0 |
| 8061 | Pig | Central  | 0 | 0 | 0 | 0 | 0 | 0 |
| 8062 | Pig | Central  | 0 | 0 | 0 | 0 | 0 | 0 |
| 8063 | Pig | Central  | 0 | 0 | 0 | 0 | 0 | 0 |



|      |     |         |   |   |   |   |   |   |
|------|-----|---------|---|---|---|---|---|---|
| 8064 | Pig | Central | 0 | 0 | 0 | 0 | 0 | 0 |
| 8065 | Pig | Central | 0 | 0 | 0 | 0 | 0 | 0 |
| 8066 | Pig | Central | 0 | 0 | 0 | 0 | 0 | 0 |
| 8067 | Pig | Central | 0 | 0 | 0 | 0 | 0 | 0 |
| 8068 | Pig | Central | 0 | 0 | 0 | 0 | 0 | 0 |
| 8069 | Pig | Central | 0 | 0 | 0 | 0 | 0 | 0 |
| 8070 | Pig | Central | 0 | 0 | 0 | 0 | 0 | 0 |
| 8071 | Pig | Central | 0 | 0 | 0 | 0 | 0 | 0 |
| 8072 | Pig | Central | 0 | 0 | 0 | 0 | 0 | 0 |
| 8073 | Pig | Central | 0 | 0 | 0 | 0 | 0 | 0 |
| 8074 | Pig | Central | 0 | 0 | 0 | 0 | 0 | 0 |
| 8075 | Pig | Central | 0 | 0 | 0 | 0 | 0 | 0 |
| 8076 | Pig | Central | 0 | 0 | 0 | 0 | 0 | 0 |
| 8077 | Pig | Central | 0 | 0 | 0 | 0 | 0 | 0 |
| 8078 | Pig | Central | 0 | 0 | 0 | 0 | 0 | 0 |
| 8079 | Pig | Central | 0 | 0 | 0 | 0 | 0 | 0 |
| 8080 | Pig | Central | 0 | 0 | 0 | 0 | 0 | 0 |
| 8081 | Pig | Central | 0 | 0 | 0 | 0 | 0 | 0 |
| 8082 | Pig | Central | 0 | 0 | 0 | 0 | 0 | 0 |
| 8083 | Pig | Central | 0 | 0 | 0 | 0 | 0 | 0 |
| 8084 | Pig | Central | 0 | 0 | 0 | 0 | 0 | 0 |
| 8085 | Pig | Central | 0 | 0 | 0 | 0 | 0 | 0 |
| 8086 | Pig | Central | 0 | 0 | 0 | 0 | 0 | 0 |
| 8087 | Pig | Central | 0 | 0 | 0 | 0 | 0 | 0 |
| 8088 | Pig | Central | 0 | 0 | 0 | 0 | 0 | 0 |
| 8089 | Pig | Central | 0 | 0 | 0 | 0 | 0 | 0 |
| 8090 | Pig | Central | 0 | 0 | 0 | 0 | 0 | 0 |
| 8091 | Pig | Central | 0 | 0 | 0 | 0 | 0 | 0 |
| 8092 | Pig | Central | 0 | 0 | 0 | 0 | 0 | 0 |
| 8093 | Pig | Central | 0 | 0 | 0 | 0 | 0 | 0 |
| 8094 | Pig | Central | 0 | 0 | 0 | 0 | 0 | 0 |
| 8095 | Pig | Central | 0 | 0 | 0 | 0 | 0 | 0 |
| 8096 | Pig | Central | 0 | 0 | 0 | 0 | 0 | 0 |
| 8097 | Pig | Central | 0 | 0 | 0 | 0 | 0 | 0 |
| 8098 | Pig | Central | 0 | 0 | 0 | 0 | 0 | 0 |
| 8099 | Pig | Central | 0 | 0 | 0 | 0 | 0 | 0 |
| 8100 | Pig | Central | 0 | 0 | 0 | 0 | 0 | 0 |
| 8101 | Pig | Central | 0 | 0 | 0 | 0 | 0 | 0 |
| 8102 | Pig | Central | 0 | 0 | 0 | 0 | 0 | 0 |
| 8103 | Pig | Central | 0 | 0 | 0 | 0 | 0 | 0 |
| 8104 | Pig | Central | 0 | 0 | 0 | 0 | 0 | 0 |
| 8105 | Pig | Central | 0 | 0 | 0 | 0 | 0 | 0 |
| 8106 | Pig | Central | 0 | 0 | 0 | 0 | 0 | 0 |
| 8107 | Pig | Central | 0 | 0 | 0 | 0 | 0 | 0 |
| 8108 | Pig | Central | 0 | 0 | 0 | 0 | 0 | 0 |
| 8109 | Pig | Central | 0 | 0 | 0 | 0 | 0 | 0 |
| 8110 | Pig | Central | 0 | 0 | 0 | 0 | 0 | 0 |
| 8111 | Pig | Central | 0 | 0 | 0 | 0 | 0 | 0 |

|      |     |         |   |   |   |   |   |   |
|------|-----|---------|---|---|---|---|---|---|
| 8112 | Pig | Central | 0 | 0 | 0 | 0 | 0 | 0 |
| 8113 | Pig | Central | 0 | 0 | 0 | 0 | 0 | 0 |
| 8114 | Pig | Central | 0 | 0 | 0 | 0 | 0 | 0 |
| 8115 | Pig | Central | 0 | 0 | 0 | 0 | 0 | 0 |
| 8116 | Pig | Central | 0 | 0 | 0 | 0 | 0 | 0 |
| 8117 | Pig | Central | 0 | 0 | 0 | 0 | 0 | 0 |
| 8118 | Pig | Eastern | 0 | 0 | 0 | 0 | 0 | 0 |
| 8119 | Pig | Eastern | 0 | 0 | 0 | 0 | 0 | 0 |
| 8120 | Pig | Eastern | 0 | 0 | 0 | 0 | 0 | 0 |
| 8121 | Pig | Eastern | 0 | 0 | 0 | 0 | 0 | 0 |
| 8122 | Pig | Eastern | 0 | 0 | 0 | 0 | 0 | 0 |
| 8123 | Pig | Eastern | 0 | 0 | 0 | 0 | 0 | 0 |
| 8124 | Pig | Eastern | 0 | 0 | 0 | 0 | 0 | 0 |
| 8125 | Pig | Eastern | 0 | 0 | 0 | 0 | 0 | 0 |
| 8126 | Pig | Central | 0 | 0 | 0 | 0 | 0 | 0 |
| 8127 | Pig | Central | 0 | 0 | 0 | 0 | 0 | 0 |
| 8128 | Pig | Central | 0 | 0 | 1 | 1 | 0 | 1 |
| 8129 | Pig | Central | 0 | 0 | 0 | 0 | 0 | 0 |
| 8130 | Pig | Central | 0 | 0 | 0 | 0 | 0 | 0 |
| 8131 | Pig | Central | 0 | 0 | 1 | 1 | 0 | 1 |
| 8132 | Pig | Central | 0 | 0 | 0 | 0 | 0 | 0 |
| 8133 | Pig | Central | 0 | 0 | 0 | 0 | 0 | 0 |
| 8134 | Pig | Central | 0 | 0 | 0 | 0 | 0 | 0 |
| 8135 | Pig | Central | 0 | 0 | 0 | 0 | 0 | 0 |
| 8136 | Pig | Central | 0 | 0 | 0 | 0 | 0 | 0 |
| 8137 | Pig | Central | 0 | 0 | 0 | 0 | 0 | 0 |
| 8138 | Pig | Central | 0 | 0 | 0 | 0 | 0 | 0 |
| 8139 | Pig | Central | 0 | 0 | 1 | 0 | 0 | 1 |
| 8140 | Pig | Central | 0 | 0 | 0 | 0 | 0 | 0 |
| 8141 | Pig | Central | 0 | 0 | 0 | 0 | 0 | 0 |
| 8142 | Pig | Central | 0 | 0 | 0 | 0 | 0 | 0 |
| 8143 | Pig | Central | 0 | 0 | 0 | 0 | 0 | 0 |
| 8144 | Pig | Central | 0 | 0 | 0 | 0 | 0 | 1 |
| 8145 | Pig | Central | 0 | 0 | 0 | 0 | 0 | 0 |
| 8146 | Pig | Central | 0 | 0 | 0 | 0 | 0 | 0 |
| 8147 | Pig | Central | 0 | 0 | 0 | 0 | 0 | 0 |
| 8148 | Pig | Central | 1 | 0 | 0 | 0 | 0 | 1 |
| 8149 | Pig | Central | 0 | 0 | 0 | 0 | 0 | 0 |
| 8150 | Pig | Central | 0 | 0 | 0 | 1 | 0 | 1 |
| 8151 | Pig | Central | 0 | 0 | 0 | 0 | 0 | 0 |
| 8152 | Pig | Central | 0 | 0 | 0 | 0 | 0 | 0 |
| 8153 | Pig | Central | 0 | 0 | 0 | 0 | 0 | 0 |
| 8154 | Pig | Central | 0 | 0 | 0 | 0 | 0 | 0 |
| 8155 | Pig | Central | 0 | 0 | 0 | 0 | 0 | 0 |
| 8156 | Pig | Central | 0 | 0 | 0 | 0 | 0 | 0 |
| 8157 | Pig | Central | 0 | 0 | 0 | 0 | 0 | 0 |
| 8158 | Pig | Central | 0 | 0 | 0 | 0 | 0 | 0 |
| 8159 | Pig | Central | 0 | 0 | 0 | 0 | 0 | 0 |

|      |     |         |   |   |   |   |   |   |
|------|-----|---------|---|---|---|---|---|---|
| 8160 | Pig | Central | 0 | 0 | 0 | 0 | 0 | 0 |
| 8161 | Pig | Central | 0 | 0 | 0 | 0 | 0 | 0 |
| 8162 | Pig | Central | 0 | 0 | 0 | 0 | 0 | 0 |
| 8163 | Pig | Central | 0 | 0 | 0 | 0 | 0 | 0 |
| 8164 | Pig | Central | 0 | 0 | 0 | 0 | 0 | 0 |
| 8165 | Pig | Central | 0 | 0 | 0 | 0 | 0 | 0 |
| 8166 | Pig | Central | 0 | 0 | 0 | 0 | 0 | 0 |
| 8167 | Pig | Central | 0 | 0 | 0 | 0 | 0 | 0 |
| 8168 | Pig | Central | 0 | 0 | 0 | 0 | 0 | 0 |
| 8169 | Pig | Central | 0 | 0 | 0 | 0 | 0 | 0 |
| 8170 | Pig | Central | 0 | 0 | 0 | 0 | 0 | 0 |
| 8171 | Pig | Central | 0 | 0 | 0 | 0 | 0 | 0 |
| 8172 | Pig | Central | 0 | 0 | 0 | 0 | 0 | 0 |
| 8173 | Pig | Central | 0 | 0 | 0 | 0 | 0 | 0 |
| 8174 | Pig | Central | 0 | 0 | 0 | 0 | 0 | 0 |
| 8175 | Pig | Central | 0 | 0 | 0 | 0 | 0 | 0 |
| 8176 | Pig | Central | 0 | 0 | 0 | 0 | 0 | 0 |
| 8177 | Pig | Central | 0 | 0 | 0 | 0 | 0 | 0 |
| 8178 | Pig | Central | 0 | 0 | 0 | 0 | 0 | 0 |
| 8179 | Pig | Central | 0 | 0 | 0 | 0 | 0 | 0 |
| 8180 | Pig | Central | 0 | 0 | 0 | 0 | 0 | 0 |
| 8181 | Pig | Central | 0 | 0 | 0 | 0 | 0 | 0 |
| 8182 | Pig | Central | 0 | 0 | 0 | 0 | 0 | 0 |
| 8183 | Pig | Central | 0 | 0 | 0 | 0 | 0 | 0 |
| 8184 | Pig | Central | 0 | 0 | 0 | 0 | 0 | 0 |
| 8185 | Pig | Central | 0 | 0 | 0 | 0 | 0 | 0 |
| 8186 | Pig | Central | 0 | 0 | 0 | 0 | 0 | 0 |
| 8187 | Pig | Central | 0 | 0 | 0 | 0 | 0 | 0 |
| 8188 | Pig | Central | 0 | 0 | 0 | 0 | 0 | 0 |
| 8189 | Pig | Central | 0 | 0 | 0 | 0 | 0 | 0 |
| 8190 | Pig | Central | 0 | 0 | 0 | 0 | 0 | 0 |
| 8191 | Pig | Central | 0 | 0 | 0 | 0 | 0 | 0 |
| 8192 | Pig | Central | 0 | 0 | 0 | 0 | 0 | 0 |
| 8193 | Pig | Central | 0 | 0 | 0 | 0 | 0 | 0 |
| 8194 | Pig | Central | 0 | 0 | 0 | 0 | 0 | 0 |
| 8195 | Pig | Central | 0 | 0 | 0 | 0 | 0 | 0 |
| 8196 | Pig | Central | 0 | 0 | 0 | 0 | 0 | 0 |
| 8197 | Pig | Central | 0 | 0 | 0 | 0 | 0 | 0 |
| 8198 | Pig | Central | 0 | 0 | 1 | 0 | 0 | 1 |
| 8199 | Pig | Central | 0 | 0 | 0 | 0 | 0 | 0 |
| 8200 | Pig | Central | 0 | 0 | 1 | 0 | 0 | 1 |
| 8201 | Pig | Central | 0 | 0 | 0 | 0 | 0 | 0 |
| 8202 | Pig | Central | 0 | 0 | 0 | 0 | 0 | 0 |
| 8203 | Pig | Central | 0 | 0 | 0 | 0 | 0 | 0 |
| 8204 | Pig | Central | 0 | 0 | 0 | 0 | 0 | 0 |
| 8205 | Pig | Central | 0 | 0 | 0 | 0 | 0 | 0 |
| 8206 | Pig | Central | 0 | 0 | 0 | 0 | 0 | 0 |
| 8207 | Pig | Central | 0 | 0 | 0 | 0 | 0 | 0 |

|      |     |         |   |   |   |   |   |   |
|------|-----|---------|---|---|---|---|---|---|
| 8208 | Pig | Central | 0 | 0 | 0 | 0 | 0 | 0 |
| 8209 | Pig | Central | 0 | 0 | 0 | 0 | 0 | 0 |
| 8210 | Pig | Central | 0 | 0 | 0 | 0 | 0 | 0 |
| 8211 | Pig | Central | 0 | 0 | 0 | 0 | 0 | 0 |
| 8212 | Pig | Central | 0 | 0 | 0 | 0 | 0 | 0 |
| 8213 | Pig | Central | 0 | 0 | 0 | 0 | 0 | 0 |
| 8214 | Pig | Central | 0 | 0 | 0 | 0 | 0 | 0 |
| 8215 | Pig | Central | 0 | 0 | 0 | 0 | 0 | 0 |
| 8216 | Pig | Central | 0 | 0 | 0 | 0 | 0 | 0 |
| 8217 | Pig | Central | 0 | 0 | 0 | 0 | 0 | 0 |
| 8218 | Pig | Central | 0 | 0 | 0 | 0 | 0 | 0 |
| 8219 | Pig | Central | 0 | 0 | 0 | 0 | 0 | 0 |
| 8220 | Pig | Central | 0 | 0 | 0 | 0 | 0 | 0 |
| 8221 | Pig | Central | 0 | 0 | 0 | 0 | 0 | 0 |
| 8222 | Pig | Central | 0 | 0 | 0 | 0 | 0 | 0 |
| 8223 | Pig | Central | 0 | 0 | 0 | 0 | 0 | 0 |
| 8224 | Pig | Central | 0 | 0 | 0 | 0 | 0 | 0 |
| 8225 | Pig | Central | 0 | 0 | 0 | 0 | 0 | 0 |
| 8226 | Pig | Central | 0 | 0 | 0 | 0 | 0 | 0 |
| 8227 | Pig | Central | 0 | 0 | 0 | 0 | 0 | 0 |
| 8228 | Pig | Central | 0 | 0 | 0 | 0 | 0 | 0 |
| 8229 | Pig | Central | 0 | 0 | 0 | 0 | 0 | 0 |
| 8230 | Pig | Central | 0 | 0 | 0 | 0 | 0 | 0 |
| 8231 | Pig | Central | 0 | 0 | 0 | 0 | 0 | 0 |
| 8232 | Pig | Central | 0 | 0 | 0 | 0 | 0 | 0 |
| 8233 | Pig | Central | 0 | 0 | 0 | 0 | 0 | 0 |
| 8234 | Pig | Central | 0 | 0 | 0 | 0 | 0 | 0 |
| 8235 | Pig | Central | 0 | 0 | 0 | 0 | 0 | 0 |
| 8236 | Pig | Central | 0 | 0 | 0 | 0 | 0 | 0 |
| 8237 | Pig | Central | 0 | 0 | 0 | 0 | 0 | 0 |
| 8238 | Pig | Central | 0 | 0 | 0 | 0 | 0 | 0 |
| 8239 | Pig | Central | 0 | 0 | 0 | 0 | 0 | 0 |
| 8240 | Pig | Central | 0 | 0 | 0 | 0 | 0 | 0 |
| 8241 | Pig | Central | 0 | 0 | 0 | 0 | 0 | 0 |
| 8242 | Pig | Central | 0 | 0 | 0 | 0 | 0 | 0 |
| 8243 | Pig | Central | 0 | 0 | 0 | 0 | 0 | 0 |
| 8244 | Pig | Central | 0 | 0 | 0 | 0 | 0 | 0 |
| 8245 | Pig | Central | 0 | 0 | 0 | 0 | 0 | 0 |
| 8246 | Pig | Central | 1 | 0 | 0 | 0 | 0 | 1 |
| 8247 | Pig | Central | 0 | 0 | 1 | 0 | 0 | 1 |
| 8248 | Pig | Central | 0 | 0 | 0 | 0 | 0 | 0 |
| 8249 | Pig | Central | 0 | 0 | 1 | 1 | 0 | 1 |
| 8250 | Pig | Central | 0 | 0 | 0 | 0 | 0 | 0 |
| 8251 | Pig | Central | 0 | 0 | 0 | 0 | 0 | 0 |
| 8252 | Pig | Central | 0 | 0 | 1 | 1 | 0 | 1 |
| 8253 | Pig | Central | 0 | 0 | 0 | 0 | 0 | 0 |
| 8254 | Pig | Central | 0 | 0 | 0 | 0 | 0 | 0 |
| 8255 | Pig | Central | 0 | 0 | 0 | 0 | 0 | 0 |

|      |     |         |   |   |   |   |   |   |
|------|-----|---------|---|---|---|---|---|---|
| 8256 | Pig | Central | 0 | 0 | 0 | 0 | 0 | 0 |
| 8257 | Pig | Central | 0 | 0 | 0 | 0 | 0 | 0 |
| 8258 | Pig | Central | 0 | 0 | 0 | 0 | 0 | 0 |
| 8259 | Pig | Central | 0 | 0 | 0 | 0 | 0 | 0 |
| 8260 | Pig | Central | 0 | 0 | 0 | 0 | 0 | 0 |
| 8261 | Pig | Central | 0 | 0 | 0 | 0 | 0 | 0 |
| 8262 | Pig | Central | 0 | 0 | 0 | 0 | 0 | 0 |
| 8263 | Pig | Central | 0 | 0 | 0 | 0 | 0 | 0 |
| 8264 | Pig | Central | 0 | 0 | 0 | 0 | 0 | 0 |
| 8265 | Pig | Central | 0 | 0 | 0 | 0 | 0 | 0 |
| 8266 | Pig | Central | 0 | 0 | 0 | 0 | 0 | 0 |
| 8267 | Pig | Central | 0 | 0 | 0 | 0 | 0 | 0 |
| 8268 | Pig | Central | 0 | 0 | 0 | 0 | 0 | 0 |
| 8269 | Pig | Central | 0 | 0 | 0 | 0 | 0 | 0 |
| 8270 | Pig | Central | 0 | 0 | 0 | 0 | 0 | 0 |
| 8271 | Pig | Central | 0 | 0 | 0 | 0 | 0 | 0 |
| 8272 | Pig | Central | 0 | 0 | 0 | 0 | 0 | 0 |
| 8273 | Pig | Central | 0 | 0 | 0 | 0 | 0 | 0 |
| 8274 | Pig | Central | 0 | 0 | 0 | 0 | 0 | 0 |
| 8275 | Pig | Central | 0 | 0 | 0 | 0 | 0 | 0 |
| 8276 | Pig | Central | 0 | 0 | 0 | 0 | 0 | 0 |
| 8277 | Pig | Central | 0 | 0 | 0 | 0 | 0 | 0 |
| 8278 | Pig | Central | 0 | 0 | 0 | 0 | 0 | 0 |
| 8279 | Pig | Central | 0 | 0 | 0 | 0 | 0 | 0 |
| 8280 | Pig | Central | 0 | 0 | 0 | 0 | 0 | 0 |
| 8281 | Pig | Central | 0 | 0 | 0 | 0 | 0 | 0 |
| 8282 | Pig | Central | 0 | 0 | 0 | 0 | 0 | 0 |
| 8283 | Pig | Central | 0 | 0 | 0 | 0 | 0 | 0 |
| 8284 | Pig | Central | 0 | 0 | 0 | 0 | 0 | 0 |
| 8285 | Pig | Central | 0 | 0 | 0 | 0 | 0 | 0 |
| 8286 | Pig | Central | 0 | 0 | 0 | 0 | 0 | 0 |
| 8287 | Pig | Central | 0 | 0 | 0 | 0 | 0 | 0 |
| 8288 | Pig | Central | 0 | 0 | 0 | 0 | 0 | 0 |
| 8289 | Pig | Central | 0 | 0 | 0 | 0 | 0 | 0 |
| 8290 | Pig | Central | 0 | 0 | 0 | 0 | 0 | 0 |
| 8291 | Pig | Central | 0 | 0 | 0 | 0 | 0 | 0 |
| 8292 | Pig | Central | 0 | 0 | 0 | 0 | 0 | 0 |
| 8293 | Pig | Central | 0 | 0 | 0 | 0 | 0 | 0 |
| 8294 | Pig | Central | 0 | 0 | 0 | 0 | 0 | 0 |
| 8295 | Pig | Central | 0 | 0 | 0 | 0 | 0 | 0 |
| 8296 | Pig | Central | 0 | 0 | 0 | 0 | 0 | 0 |
| 8297 | Pig | Central | 0 | 0 | 0 | 0 | 0 | 0 |
| 8298 | Pig | Central | 0 | 0 | 0 | 0 | 0 | 0 |
| 8299 | Pig | Central | 0 | 0 | 0 | 0 | 0 | 0 |
| 8300 | Pig | Central | 0 | 0 | 0 | 0 | 0 | 0 |
| 8301 | Pig | Central | 0 | 0 | 0 | 0 | 0 | 0 |
| 8302 | Pig | Central | 0 | 0 | 0 | 0 | 0 | 0 |
| 8303 | Pig | Central | 0 | 0 | 0 | 0 | 0 | 0 |

|      |     |         |   |   |   |   |   |   |
|------|-----|---------|---|---|---|---|---|---|
| 8304 | Pig | Central | 0 | 0 | 0 | 0 | 0 | 0 |
| 8305 | Pig | Central | 0 | 0 | 0 | 0 | 0 | 0 |
| 8306 | Pig | Central | 0 | 0 | 0 | 0 | 0 | 0 |
| 8307 | Pig | Central | 0 | 0 | 0 | 0 | 0 | 0 |
| 8308 | Pig | Central | 0 | 0 | 0 | 0 | 0 | 0 |
| 8309 | Pig | Central | 0 | 0 | 0 | 0 | 0 | 0 |
| 8310 | Pig | Central | 0 | 0 | 0 | 0 | 0 | 0 |
| 8311 | Pig | Central | 0 | 0 | 0 | 0 | 0 | 0 |
| 8312 | Pig | Central | 0 | 0 | 0 | 0 | 0 | 0 |
| 8313 | Pig | Central | 0 | 0 | 0 | 0 | 0 | 0 |
| 8314 | Pig | Central | 0 | 0 | 0 | 0 | 0 | 0 |
| 8315 | Pig | Central | 0 | 0 | 0 | 0 | 0 | 0 |
| 8316 | Pig | Central | 0 | 0 | 0 | 0 | 0 | 0 |
| 8317 | Pig | Central | 0 | 0 | 0 | 0 | 0 | 0 |
| 8318 | Pig | Central | 0 | 0 | 0 | 0 | 0 | 0 |
| 8319 | Pig | Central | 0 | 0 | 0 | 0 | 0 | 0 |
| 8320 | Pig | Central | 0 | 0 | 0 | 0 | 0 | 0 |
| 8321 | Pig | Central | 0 | 0 | 0 | 0 | 0 | 0 |
| 8322 | Pig | Central | 0 | 0 | 0 | 0 | 0 | 0 |
| 8323 | Pig | Central | 0 | 0 | 0 | 0 | 0 | 0 |
| 8324 | Pig | Central | 0 | 0 | 0 | 0 | 0 | 0 |
| 8325 | Pig | Central | 0 | 0 | 0 | 0 | 0 | 0 |
| 8326 | Pig | Central | 0 | 0 | 0 | 0 | 0 | 0 |
| 8327 | Pig | Central | 0 | 0 | 0 | 0 | 0 | 0 |
| 8328 | Pig | Central | 0 | 0 | 0 | 0 | 0 | 0 |
| 8329 | Pig | Central | 0 | 0 | 1 | 0 | 0 | 1 |
| 8330 | Pig | Central | 0 | 0 | 0 | 0 | 0 | 0 |
| 8331 | Pig | Central | 0 | 0 | 0 | 0 | 0 | 0 |
| 8332 | Pig | Central | 0 | 0 | 0 | 0 | 0 | 0 |
| 8333 | Pig | Central | 0 | 0 | 0 | 0 | 0 | 0 |
| 8334 | Pig | Central | 0 | 0 | 0 | 0 | 0 | 0 |
| 8335 | Pig | Central | 0 | 0 | 0 | 0 | 0 | 0 |
| 8336 | Pig | Central | 0 | 0 | 0 | 0 | 0 | 0 |
| 8337 | Pig | Central | 0 | 0 | 0 | 0 | 0 | 0 |
| 8338 | Pig | Central | 0 | 0 | 0 | 0 | 0 | 0 |
| 8339 | Pig | Central | 0 | 0 | 0 | 0 | 0 | 0 |
| 8340 | Pig | Central | 0 | 0 | 0 | 0 | 0 | 0 |
| 8341 | Pig | Central | 0 | 0 | 0 | 0 | 0 | 0 |
| 8342 | Pig | Central | 0 | 0 | 0 | 0 | 0 | 0 |
| 8343 | Pig | Central | 0 | 0 | 0 | 0 | 0 | 0 |
| 8344 | Pig | Central | 0 | 0 | 1 | 0 | 0 | 1 |
| 8345 | Pig | Central | 0 | 0 | 1 | 0 | 0 | 1 |
| 8346 | Pig | Central | 0 | 0 | 0 | 0 | 0 | 0 |
| 8347 | Pig | Central | 0 | 0 | 0 | 0 | 0 | 0 |
| 8348 | Pig | Central | 0 | 0 | 0 | 0 | 0 | 0 |
| 8349 | Pig | Central | 0 | 0 | 0 | 0 | 0 | 0 |
| 8350 | Pig | Central | 0 | 0 | 0 | 0 | 0 | 0 |
| 8351 | Pig | Central | 0 | 0 | 0 | 0 | 0 | 0 |

|      |     |              |   |   |   |   |   |   |
|------|-----|--------------|---|---|---|---|---|---|
| 8352 | Pig | Central      | 0 | 0 | 0 | 0 | 0 | 0 |
| 8353 | Pig | Central      | 0 | 0 | 0 | 0 | 0 | 0 |
| 8354 | Pig | Central      | 0 | 0 | 0 | 0 | 0 | 0 |
| 8355 | Pig | Central      | 0 | 0 | 0 | 0 | 0 | 0 |
| 8356 | Pig | Central      | 0 | 0 | 0 | 0 | 0 | 0 |
| 8357 | Pig | Central      | 0 | 0 | 0 | 0 | 0 | 0 |
| 8358 | Pig | Central      | 0 | 0 | 1 | 0 | 0 | 1 |
| 8359 | Pig | Central      | 0 | 0 | 0 | 0 | 0 | 0 |
| 8360 | Pig | Central      | 0 | 0 | 0 | 0 | 0 | 0 |
| 8361 | Pig | Central      | 0 | 0 | 0 | 0 | 0 | 0 |
| 8362 | Pig | Central      | 0 | 0 | 0 | 0 | 0 | 0 |
| 8363 | Pig | Central      | 0 | 0 | 0 | 0 | 0 | 0 |
| 8364 | Pig | Central      | 0 | 0 | 0 | 0 | 0 | 0 |
| 8365 | Pig | Central      | 0 | 0 | 0 | 0 | 0 | 0 |
| 8366 | Pig | Central      | 0 | 0 | 0 | 0 | 0 | 0 |
| 8367 | Pig | Central      | 0 | 0 | 0 | 0 | 0 | 0 |
| 8368 | Pig | Central      | 0 | 0 | 0 | 0 | 0 | 0 |
| 8369 | Pig | Central      | 0 | 0 | 0 | 0 | 0 | 0 |
| 8370 | Pig | Central      | 0 | 0 | 1 | 0 | 0 | 1 |
| 8371 | Pig | Central      | 0 | 0 | 0 | 0 | 0 | 0 |
| 8372 | Pig | Central      | 0 | 0 | 0 | 0 | 0 | 0 |
| 8373 | Pig | Central      | 0 | 0 | 0 | 0 | 0 | 0 |
| 8374 | Pig | Central      | 0 | 0 | 0 | 0 | 0 | 0 |
| 8375 | Pig | Central      | 0 | 0 | 0 | 0 | 0 | 0 |
| 8376 | Pig | Central      | 0 | 0 | 0 | 0 | 0 | 0 |
| 8377 | Pig | Central      | 0 | 0 | 0 | 0 | 0 | 0 |
| 8378 | Pig | Central      | 0 | 0 | 0 | 0 | 0 | 0 |
| 8379 | Pig | Central      | 0 | 0 | 0 | 0 | 0 | 0 |
| 8380 | Pig | Central      | 0 | 0 | 0 | 0 | 0 | 0 |
| 8381 | Pig | Central      | 0 | 0 | 0 | 0 | 0 | 0 |
| 8382 | Pig | Central      | 0 | 0 | 0 | 0 | 0 | 0 |
| 8383 | Pig | Central      | 0 | 0 | 0 | 0 | 0 | 0 |
| 8384 | Pig | Central      | 0 | 0 | 0 | 0 | 0 | 0 |
| 8385 | Pig | Central      | 0 | 0 | 0 | 0 | 0 | 0 |
| 8386 | Pig | Central      | 0 | 0 | 0 | 0 | 0 | 0 |
| 8387 | Pig | Central      | 0 | 0 | 0 | 0 | 0 | 0 |
| 8388 | Pig | Central      | 0 | 0 | 0 | 0 | 0 | 0 |
| 8389 | Pig | Central      | 0 | 0 | 0 | 0 | 0 | 0 |
| 8390 | Pig | Central      | 0 | 0 | 0 | 0 | 0 | 0 |
| 8391 | Pig | Central      | 0 | 0 | 0 | 0 | 0 | 0 |
| 8392 | Pig | Central      | 0 | 0 | 0 | 0 | 0 | 0 |
| 8393 | Pig | Central      | 0 | 0 | 0 | 0 | 0 | 0 |
| 8394 | Pig | Central      | 0 | 0 | 0 | 0 | 0 | 0 |
| 8395 | Pig | Central      | 0 | 0 | 0 | 0 | 0 | 0 |
| 8396 | Pig | Central      | 0 | 0 | 0 | 0 | 0 | 0 |
| 8397 | Pig | Northeastern | 0 | 0 | 0 | 0 | 0 | 0 |
| 8398 | Pig | Northeastern | 0 | 0 | 0 | 0 | 0 | 0 |
| 8399 | Pig | Northeastern | 0 | 0 | 0 | 0 | 0 | 0 |

|      |     |              |   |   |   |   |   |   |
|------|-----|--------------|---|---|---|---|---|---|
| 8400 | Pig | Northeastern | 0 | 0 | 0 | 0 | 0 | 0 |
| 8401 | Pig | Northeastern | 0 | 0 | 0 | 0 | 0 | 0 |
| 8402 | Pig | Northeastern | 0 | 0 | 0 | 0 | 0 | 0 |
| 8403 | Pig | Northeastern | 0 | 0 | 0 | 0 | 0 | 0 |
| 8404 | Pig | Northeastern | 0 | 0 | 0 | 0 | 0 | 0 |
| 8405 | Pig | Northeastern | 0 | 0 | 0 | 0 | 0 | 0 |
| 8406 | Pig | Northeastern | 0 | 0 | 0 | 0 | 0 | 0 |
| 8407 | Pig | Northeastern | 0 | 0 | 0 | 0 | 0 | 0 |
| 8408 | Pig | Northeastern | 0 | 0 | 0 | 0 | 0 | 0 |
| 8409 | Pig | Northeastern | 0 | 0 | 0 | 0 | 0 | 0 |
| 8410 | Pig | Northeastern | 0 | 0 | 0 | 0 | 0 | 0 |
| 8411 | Pig | Northeastern | 0 | 0 | 0 | 0 | 0 | 0 |
| 8412 | Pig | Northeastern | 0 | 0 | 0 | 0 | 0 | 0 |
| 8413 | Pig | Northeastern | 0 | 0 | 0 | 0 | 0 | 0 |
| 8414 | Pig | Northeastern | 0 | 0 | 0 | 0 | 0 | 0 |
| 8415 | Pig | Northeastern | 0 | 0 | 0 | 0 | 0 | 0 |
| 8416 | Pig | Northeastern | 0 | 0 | 0 | 0 | 0 | 0 |
| 8417 | Pig | Northeastern | 0 | 0 | 0 | 0 | 0 | 0 |
| 8418 | Pig | Northeastern | 0 | 0 | 0 | 0 | 0 | 0 |
| 8419 | Pig | Northeastern | 0 | 0 | 0 | 0 | 0 | 0 |
| 8420 | Pig | Northeastern | 0 | 0 | 0 | 0 | 0 | 0 |
| 8421 | Pig | Northeastern | 0 | 0 | 0 | 0 | 0 | 0 |
| 8422 | Pig | Northeastern | 0 | 0 | 0 | 0 | 0 | 0 |
| 8423 | Pig | Northeastern | 0 | 0 | 0 | 0 | 0 | 0 |
| 8424 | Pig | Northeastern | 0 | 0 | 0 | 0 | 0 | 0 |
| 8425 | Pig | Northeastern | 0 | 0 | 0 | 0 | 0 | 0 |
| 8426 | Pig | Northeastern | 0 | 0 | 0 | 0 | 0 | 0 |
| 8427 | Pig | Northeastern | 0 | 0 | 0 | 0 | 0 | 0 |
| 8428 | Pig | Northeastern | 0 | 0 | 0 | 0 | 0 | 0 |
| 8429 | Pig | Northeastern | 0 | 0 | 0 | 0 | 0 | 0 |
| 8430 | Pig | Northeastern | 0 | 0 | 0 | 0 | 0 | 0 |
| 8431 | Pig | Northeastern | 0 | 0 | 0 | 0 | 0 | 0 |
| 8432 | Pig | Northeastern | 0 | 0 | 0 | 0 | 0 | 0 |
| 8433 | Pig | Northeastern | 0 | 0 | 0 | 0 | 0 | 0 |
| 8434 | Pig | Northeastern | 0 | 0 | 0 | 0 | 0 | 0 |
| 8435 | Pig | Northeastern | 0 | 0 | 0 | 0 | 0 | 0 |
| 8436 | Pig | Northeastern | 0 | 0 | 0 | 0 | 0 | 0 |
| 8437 | Pig | Northeastern | 0 | 0 | 0 | 0 | 0 | 0 |
| 8438 | Pig | Northeastern | 0 | 0 | 0 | 0 | 0 | 0 |
| 8439 | Pig | Northeastern | 0 | 0 | 0 | 0 | 0 | 0 |
| 8440 | Pig | Northeastern | 0 | 0 | 0 | 0 | 0 | 0 |
| 8441 | Pig | Northeastern | 0 | 0 | 0 | 0 | 0 | 0 |
| 8442 | Pig | Northeastern | 0 | 0 | 0 | 0 | 0 | 0 |
| 8443 | Pig | Northeastern | 0 | 0 | 0 | 0 | 0 | 0 |
| 8444 | Pig | Northeastern | 0 | 0 | 0 | 0 | 0 | 0 |
| 8445 | Pig | Northeastern | 0 | 0 | 0 | 0 | 0 | 0 |
| 8446 | Pig | Northeastern | 0 | 0 | 0 | 0 | 0 | 0 |
| 8447 | Pig | Northeastern | 0 | 0 | 0 | 0 | 0 | 0 |



|      |     |              |   |   |   |   |   |   |
|------|-----|--------------|---|---|---|---|---|---|
| 8448 | Pig | Northeastern | 0 | 0 | 0 | 0 | 0 | 0 |
| 8449 | Pig | Northeastern | 0 | 0 | 0 | 0 | 0 | 0 |
| 8450 | Pig | Northeastern | 0 | 0 | 0 | 0 | 0 | 0 |
| 8451 | Pig | Northeastern | 0 | 0 | 0 | 0 | 0 | 0 |
| 8452 | Pig | Northeastern | 0 | 0 | 0 | 0 | 0 | 0 |
| 8453 | Pig | Northeastern | 0 | 0 | 0 | 0 | 0 | 0 |
| 8454 | Pig | Northeastern | 0 | 0 | 0 | 0 | 0 | 0 |
| 8455 | Pig | Northeastern | 0 | 0 | 0 | 0 | 0 | 0 |
| 8456 | Pig | Northeastern | 0 | 0 | 0 | 0 | 0 | 0 |
| 8457 | Pig | Northeastern | 0 | 0 | 0 | 0 | 0 | 0 |
| 8458 | Pig | Northeastern | 0 | 0 | 0 | 0 | 0 | 0 |
| 8459 | Pig | Northeastern | 0 | 0 | 0 | 0 | 0 | 0 |
| 8460 | Pig | Northeastern | 0 | 0 | 0 | 0 | 0 | 0 |
| 8461 | Pig | Northeastern | 0 | 0 | 0 | 0 | 0 | 0 |
| 8462 | Pig | Northeastern | 0 | 0 | 0 | 0 | 0 | 0 |
| 8463 | Pig | Northeastern | 0 | 0 | 0 | 0 | 0 | 0 |
| 8464 | Pig | Northeastern | 0 | 0 | 0 | 0 | 0 | 0 |
| 8465 | Pig | Northeastern | 0 | 0 | 0 | 0 | 0 | 0 |
| 8466 | Pig | Northeastern | 0 | 0 | 0 | 0 | 0 | 0 |
| 8467 | Pig | Northeastern | 0 | 0 | 0 | 0 | 0 | 0 |
| 8468 | Pig | Northeastern | 0 | 0 | 1 | 1 | 0 | 1 |
| 8469 | Pig | Northeastern | 0 | 0 | 0 | 0 | 0 | 0 |
| 8470 | Pig | Northeastern | 0 | 0 | 0 | 0 | 0 | 0 |
| 8471 | Pig | Northeastern | 0 | 0 | 1 | 1 | 0 | 1 |
| 8472 | Pig | Northeastern | 0 | 0 | 0 | 0 | 0 | 0 |
| 8473 | Pig | Northeastern | 0 | 0 | 1 | 1 | 0 | 1 |
| 8474 | Pig | Northeastern | 0 | 0 | 0 | 0 | 0 | 0 |
| 8475 | Pig | Northeastern | 0 | 0 | 0 | 0 | 0 | 0 |
| 8476 | Pig | Northeastern | 0 | 0 | 0 | 0 | 0 | 0 |
| 8477 | Pig | Northeastern | 0 | 0 | 0 | 0 | 0 | 0 |
| 8478 | Pig | Northeastern | 0 | 0 | 1 | 0 | 0 | 1 |
| 8479 | Pig | Northeastern | 0 | 0 | 1 | 1 | 0 | 1 |
| 8480 | Pig | Northeastern | 0 | 0 | 0 | 0 | 0 | 0 |
| 8481 | Pig | Northeastern | 0 | 0 | 0 | 0 | 0 | 0 |
| 8482 | Pig | Northeastern | 0 | 0 | 0 | 0 | 0 | 0 |
| 8483 | Pig | Northeastern | 0 | 0 | 0 | 0 | 0 | 0 |
| 8484 | Pig | Northeastern | 0 | 0 | 0 | 0 | 0 | 0 |
| 8485 | Pig | Northeastern | 0 | 0 | 0 | 0 | 0 | 0 |
| 8486 | Pig | Northeastern | 0 | 0 | 0 | 0 | 0 | 0 |
| 8487 | Pig | Northeastern | 0 | 0 | 0 | 0 | 0 | 0 |
| 8488 | Pig | Northeastern | 0 | 0 | 0 | 0 | 0 | 0 |
| 8489 | Pig | Northeastern | 0 | 0 | 0 | 0 | 0 | 0 |
| 8490 | Pig | Northeastern | 0 | 0 | 0 | 0 | 0 | 0 |
| 8491 | Pig | Northeastern | 0 | 0 | 0 | 0 | 0 | 0 |
| 8492 | Pig | Northeastern | 0 | 0 | 0 | 0 | 0 | 0 |
| 8493 | Pig | Northeastern | 0 | 0 | 0 | 0 | 0 | 0 |
| 8494 | Pig | Northeastern | 0 | 0 | 0 | 0 | 0 | 0 |
| 8495 | Pig | Northeastern | 0 | 0 | 0 | 0 | 0 | 0 |

|      |     |              |   |   |   |   |   |   |
|------|-----|--------------|---|---|---|---|---|---|
| 8496 | Pig | Northeastern | 0 | 0 | 0 | 0 | 0 | 0 |
| 8497 | Pig | Northeastern | 0 | 0 | 0 | 0 | 0 | 0 |
| 8498 | Pig | Northeastern | 0 | 0 | 0 | 0 | 0 | 0 |
| 8499 | Pig | Northeastern | 0 | 0 | 0 | 0 | 0 | 0 |
| 8500 | Pig | Northeastern | 0 | 0 | 0 | 0 | 0 | 0 |
| 8501 | Pig | Northeastern | 0 | 0 | 0 | 0 | 0 | 0 |
| 8502 | Pig | Northeastern | 0 | 0 | 0 | 0 | 0 | 0 |
| 8503 | Pig | Northeastern | 0 | 0 | 0 | 0 | 0 | 0 |
| 8504 | Pig | Northeastern | 0 | 0 | 0 | 0 | 0 | 0 |
| 8505 | Pig | Northeastern | 0 | 0 | 0 | 0 | 0 | 0 |
| 8506 | Pig | Northeastern | 0 | 0 | 0 | 0 | 0 | 0 |
| 8507 | Pig | Northeastern | 0 | 0 | 0 | 0 | 0 | 0 |
| 8508 | Pig | Northeastern | 0 | 0 | 0 | 0 | 0 | 0 |
| 8509 | Pig | Northeastern | 0 | 0 | 0 | 0 | 0 | 0 |
| 8510 | Pig | Northeastern | 0 | 0 | 0 | 0 | 0 | 0 |
| 8511 | Pig | Northeastern | 0 | 0 | 0 | 0 | 0 | 0 |
| 8512 | Pig | Northeastern | 0 | 0 | 0 | 0 | 0 | 0 |
| 8513 | Pig | Northeastern | 0 | 0 | 0 | 0 | 0 | 0 |
| 8514 | Pig | Northeastern | 0 | 0 | 0 | 0 | 0 | 0 |
| 8515 | Pig | Northeastern | 0 | 0 | 0 | 0 | 0 | 0 |
| 8516 | Pig | Northeastern | 0 | 0 | 0 | 0 | 0 | 0 |
| 8517 | Pig | Northeastern | 0 | 0 | 0 | 0 | 0 | 0 |
| 8518 | Pig | Northeastern | 0 | 0 | 0 | 0 | 0 | 0 |
| 8519 | Pig | Northeastern | 0 | 0 | 0 | 0 | 0 | 0 |
| 8520 | Pig | Northeastern | 0 | 0 | 0 | 0 | 0 | 0 |
| 8521 | Pig | Northeastern | 0 | 0 | 0 | 0 | 0 | 0 |
| 8522 | Pig | Northeastern | 0 | 0 | 0 | 0 | 0 | 0 |
| 8523 | Pig | Northeastern | 0 | 0 | 0 | 0 | 0 | 0 |
| 8524 | Pig | Northeastern | 0 | 0 | 0 | 0 | 0 | 0 |
| 8525 | Pig | Northeastern | 0 | 0 | 0 | 0 | 0 | 0 |
| 8526 | Pig | Northeastern | 0 | 0 | 0 | 0 | 0 | 0 |
| 8527 | Pig | Northeastern | 0 | 0 | 0 | 0 | 0 | 0 |
| 8528 | Pig | Northeastern | 0 | 0 | 0 | 0 | 0 | 0 |
| 8529 | Pig | Northeastern | 0 | 0 | 0 | 0 | 0 | 0 |
| 8530 | Pig | Central      | 0 | 0 | 0 | 0 | 0 | 0 |
| 8531 | Pig | Central      | 0 | 0 | 0 | 0 | 0 | 0 |
| 8532 | Pig | Central      | 0 | 0 | 0 | 0 | 0 | 0 |
| 8533 | Pig | Central      | 0 | 0 | 0 | 0 | 0 | 0 |
| 8534 | Pig | Central      | 0 | 0 | 0 | 0 | 0 | 0 |
| 8535 | Pig | Central      | 0 | 0 | 0 | 0 | 0 | 0 |
| 8536 | Pig | Central      | 0 | 0 | 0 | 0 | 0 | 0 |
| 8537 | Pig | Central      | 0 | 0 | 0 | 0 | 0 | 0 |
| 8538 | Pig | Central      | 0 | 0 | 0 | 0 | 0 | 0 |
| 8539 | Pig | Central      | 0 | 0 | 1 | 0 | 0 | 1 |
| 8540 | Pig | Central      | 0 | 0 | 0 | 0 | 0 | 0 |
| 8541 | Pig | Central      | 0 | 0 | 0 | 0 | 0 | 0 |
| 8542 | Pig | Central      | 0 | 0 | 0 | 0 | 0 | 0 |
| 8543 | Pig | Central      | 0 | 0 | 0 | 0 | 0 | 0 |

|      |     |         |   |   |   |   |   |   |
|------|-----|---------|---|---|---|---|---|---|
| 8544 | Pig | Central | 0 | 0 | 0 | 0 | 0 | 0 |
| 8545 | Pig | Central | 0 | 0 | 0 | 0 | 0 | 0 |
| 8546 | Pig | Central | 0 | 0 | 0 | 0 | 0 | 0 |
| 8547 | Pig | Central | 0 | 0 | 0 | 0 | 0 | 0 |
| 8548 | Pig | Central | 0 | 0 | 0 | 0 | 0 | 0 |
| 8549 | Pig | Central | 0 | 0 | 0 | 0 | 0 | 0 |
| 8550 | Pig | Central | 0 | 0 | 0 | 0 | 0 | 0 |
| 8551 | Pig | Central | 0 | 0 | 0 | 0 | 0 | 0 |
| 8552 | Pig | Central | 0 | 0 | 0 | 0 | 0 | 0 |
| 8553 | Pig | Central | 0 | 0 | 0 | 0 | 0 | 0 |
| 8554 | Pig | Central | 0 | 0 | 0 | 0 | 0 | 0 |
| 8555 | Pig | Central | 0 | 0 | 0 | 0 | 0 | 0 |
| 8556 | Pig | Central | 0 | 0 | 0 | 0 | 0 | 0 |
| 8557 | Pig | Central | 0 | 0 | 0 | 0 | 0 | 0 |
| 8558 | Pig | Central | 0 | 0 | 0 | 0 | 0 | 0 |
| 8559 | Pig | Central | 1 | 0 | 0 | 0 | 0 | 1 |
| 8560 | Pig | Central | 0 | 0 | 0 | 0 | 0 | 0 |
| 8561 | Pig | Central | 0 | 0 | 1 | 0 | 0 | 1 |
| 8562 | Pig | Central | 0 | 0 | 0 | 0 | 0 | 0 |
| 8563 | Pig | Central | 0 | 0 | 1 | 0 | 0 | 1 |
| 8564 | Pig | Central | 0 | 0 | 0 | 0 | 0 | 0 |
| 8565 | Pig | Central | 0 | 0 | 0 | 0 | 0 | 0 |
| 8566 | Pig | Central | 0 | 0 | 1 | 0 | 0 | 1 |
| 8567 | Pig | Central | 0 | 0 | 0 | 0 | 0 | 0 |
| 8568 | Pig | Central | 0 | 0 | 0 | 0 | 0 | 0 |
| 8569 | Pig | Central | 0 | 0 | 0 | 0 | 0 | 0 |
| 8570 | Pig | Central | 0 | 0 | 0 | 0 | 0 | 0 |
| 8571 | Pig | Central | 0 | 0 | 0 | 0 | 0 | 0 |
| 8572 | Pig | Central | 0 | 0 | 0 | 0 | 0 | 0 |
| 8573 | Pig | Central | 0 | 0 | 0 | 0 | 0 | 0 |
| 8574 | Pig | Central | 0 | 0 | 0 | 0 | 0 | 0 |
| 8575 | Pig | Central | 0 | 0 | 1 | 0 | 0 | 1 |
| 8576 | Pig | Central | 0 | 0 | 0 | 0 | 0 | 0 |
| 8577 | Pig | Central | 0 | 0 | 1 | 0 | 0 | 1 |
| 8578 | Pig | Central | 0 | 0 | 1 | 0 | 0 | 1 |
| 8579 | Pig | Central | 0 | 0 | 0 | 0 | 0 | 0 |
| 8580 | Pig | Central | 0 | 0 | 0 | 0 | 0 | 0 |
| 8581 | Pig | Central | 0 | 0 | 0 | 0 | 0 | 0 |
| 8582 | Pig | Central | 0 | 0 | 0 | 0 | 0 | 0 |
| 8583 | Pig | Central | 0 | 0 | 1 | 0 | 0 | 1 |
| 8584 | Pig | Central | 0 | 0 | 0 | 0 | 0 | 0 |
| 8585 | Pig | Central | 0 | 0 | 1 | 1 | 0 | 1 |
| 8586 | Pig | Central | 0 | 0 | 0 | 0 | 0 | 0 |
| 8587 | Pig | Central | 0 | 0 | 0 | 0 | 0 | 0 |
| 8588 | Pig | Central | 0 | 0 | 1 | 0 | 0 | 1 |
| 8589 | Pig | Central | 0 | 0 | 0 | 0 | 0 | 0 |
| 8590 | Pig | Central | 0 | 0 | 0 | 0 | 0 | 0 |
| 8591 | Pig | Central | 0 | 0 | 0 | 0 | 0 | 0 |

|      |     |          |   |   |   |   |   |   |
|------|-----|----------|---|---|---|---|---|---|
| 8592 | Pig | Central  | 0 | 0 | 0 | 0 | 0 | 0 |
| 8593 | Pig | Central  | 0 | 0 | 0 | 0 | 0 | 0 |
| 8594 | Pig | Central  | 0 | 0 | 0 | 0 | 0 | 0 |
| 8595 | Pig | Central  | 0 | 0 | 0 | 0 | 0 | 0 |
| 8596 | Pig | Central  | 0 | 0 | 0 | 0 | 0 | 0 |
| 8597 | Pig | Central  | 0 | 0 | 0 | 0 | 0 | 0 |
| 8598 | Pig | Central  | 0 | 0 | 0 | 0 | 0 | 0 |
| 8599 | Pig | Central  | 0 | 0 | 0 | 0 | 0 | 0 |
| 8600 | Pig | Central  | 0 | 0 | 0 | 0 | 0 | 0 |
| 8601 | Pig | Central  | 0 | 0 | 0 | 0 | 0 | 0 |
| 8602 | Pig | Central  | 0 | 0 | 0 | 0 | 0 | 0 |
| 8603 | Pig | Central  | 0 | 0 | 0 | 0 | 0 | 0 |
| 8604 | Pig | Central  | 0 | 0 | 0 | 0 | 0 | 0 |
| 8605 | Pig | Central  | 0 | 0 | 0 | 0 | 0 | 0 |
| 8606 | Pig | Central  | 0 | 0 | 0 | 0 | 0 | 0 |
| 8607 | Pig | Central  | 0 | 0 | 0 | 0 | 0 | 0 |
| 8608 | Pig | Central  | 0 | 0 | 0 | 0 | 0 | 0 |
| 8609 | Pig | Central  | 0 | 0 | 0 | 0 | 0 | 0 |
| 8610 | Pig | Southern | 0 | 0 | 0 | 0 | 0 | 0 |
| 8611 | Pig | Central  | 1 | 0 | 0 | 0 | 0 | 1 |
| 8612 | Pig | Central  | 0 | 0 | 0 | 0 | 0 | 0 |
| 8613 | Pig | Central  | 0 | 0 | 0 | 0 | 0 | 0 |
| 8614 | Pig | Central  | 0 | 0 | 0 | 0 | 0 | 0 |
| 8615 | Pig | Central  | 0 | 0 | 0 | 0 | 0 | 0 |
| 8616 | Pig | Central  | 0 | 0 | 0 | 0 | 0 | 0 |
| 8617 | Pig | Central  | 0 | 0 | 0 | 0 | 0 | 0 |
| 8618 | Pig | Central  | 0 | 0 | 0 | 0 | 0 | 0 |
| 8619 | Pig | Central  | 0 | 0 | 0 | 0 | 0 | 0 |
| 8620 | Pig | Central  | 0 | 0 | 0 | 0 | 0 | 0 |
| 8621 | Pig | Central  | 0 | 0 | 0 | 0 | 0 | 0 |
| 8622 | Pig | Central  | 0 | 0 | 0 | 0 | 0 | 0 |
| 8623 | Pig | Central  | 0 | 0 | 0 | 0 | 0 | 0 |
| 8624 | Pig | Central  | 0 | 0 | 0 | 0 | 0 | 0 |
| 8625 | Pig | Central  | 0 | 0 | 0 | 0 | 0 | 0 |
| 8626 | Pig | Central  | 0 | 0 | 0 | 0 | 0 | 0 |
| 8627 | Pig | Central  | 0 | 0 | 0 | 0 | 0 | 0 |
| 8628 | Pig | Central  | 0 | 0 | 0 | 0 | 0 | 0 |
| 8629 | Pig | Central  | 0 | 0 | 0 | 0 | 0 | 0 |
| 8630 | Pig | Central  | 0 | 0 | 0 | 0 | 0 | 0 |
| 8631 | Pig | Central  | 0 | 0 | 0 | 0 | 0 | 0 |
| 8632 | Pig | Central  | 0 | 0 | 0 | 0 | 0 | 0 |
| 8633 | Pig | Central  | 0 | 0 | 0 | 0 | 0 | 0 |
| 8634 | Pig | Central  | 0 | 0 | 0 | 0 | 0 | 0 |
| 8635 | Pig | Central  | 0 | 0 | 0 | 0 | 0 | 0 |
| 8636 | Pig | Central  | 0 | 0 | 0 | 0 | 0 | 0 |
| 8637 | Pig | Central  | 0 | 0 | 0 | 0 | 0 | 0 |
| 8638 | Pig | Central  | 0 | 0 | 0 | 0 | 0 | 0 |
| 8639 | Pig | Central  | 0 | 0 | 0 | 0 | 0 | 0 |

|      |     |         |   |   |   |   |   |   |
|------|-----|---------|---|---|---|---|---|---|
| 8640 | Pig | Central | 0 | 0 | 0 | 0 | 0 | 0 |
| 8641 | Pig | Central | 0 | 0 | 0 | 0 | 0 | 0 |
| 8642 | Pig | Central | 0 | 0 | 0 | 0 | 0 | 0 |
| 8643 | Pig | Central | 0 | 0 | 0 | 0 | 0 | 0 |
| 8644 | Pig | Central | 0 | 0 | 0 | 0 | 0 | 0 |
| 8645 | Pig | Central | 0 | 0 | 0 | 0 | 0 | 0 |
| 8646 | Pig | Central | 0 | 0 | 0 | 0 | 0 | 0 |
| 8647 | Pig | Central | 0 | 0 | 0 | 0 | 0 | 0 |
| 8648 | Pig | Central | 0 | 0 | 0 | 0 | 0 | 0 |
| 8649 | Pig | Central | 0 | 0 | 0 | 0 | 0 | 0 |
| 8650 | Pig | Central | 0 | 0 | 0 | 0 | 0 | 0 |
| 8651 | Pig | Central | 0 | 0 | 0 | 0 | 0 | 0 |
| 8652 | Pig | Central | 0 | 0 | 0 | 0 | 0 | 0 |
| 8653 | Pig | Central | 0 | 0 | 0 | 0 | 0 | 0 |
| 8654 | Pig | Central | 0 | 0 | 0 | 0 | 0 | 0 |
| 8655 | Pig | Central | 0 | 0 | 0 | 0 | 0 | 0 |
| 8656 | Pig | Central | 0 | 0 | 0 | 0 | 0 | 0 |
| 8657 | Pig | Central | 0 | 0 | 0 | 0 | 0 | 0 |
| 8658 | Pig | Central | 0 | 0 | 0 | 0 | 0 | 0 |
| 8659 | Pig | Central | 0 | 0 | 0 | 0 | 0 | 0 |
| 8660 | Pig | Central | 0 | 0 | 0 | 0 | 0 | 0 |
| 8661 | Pig | Central | 0 | 0 | 0 | 0 | 0 | 0 |
| 8662 | Pig | Central | 0 | 0 | 0 | 0 | 0 | 0 |
| 8663 | Pig | Central | 0 | 0 | 0 | 0 | 0 | 0 |
| 8664 | Pig | Central | 0 | 0 | 0 | 0 | 0 | 0 |
| 8665 | Pig | Central | 1 | 0 | 0 | 1 | 0 | 1 |
| 8666 | Pig | Central | 0 | 0 | 0 | 0 | 0 | 0 |
| 8667 | Pig | Central | 0 | 0 | 0 | 0 | 0 | 0 |
| 8668 | Pig | Central | 0 | 0 | 0 | 0 | 0 | 0 |
| 8669 | Pig | Central | 0 | 0 | 0 | 0 | 0 | 0 |
| 8670 | Pig | Central | 0 | 0 | 0 | 0 | 0 | 0 |
| 8671 | Pig | Central | 0 | 0 | 0 | 0 | 0 | 0 |
| 8672 | Pig | Central | 0 | 0 | 0 | 0 | 0 | 0 |
| 8673 | Pig | Central | 0 | 0 | 0 | 0 | 0 | 0 |
| 8674 | Pig | Central | 0 | 0 | 0 | 0 | 0 | 0 |
| 8675 | Pig | Central | 0 | 0 | 0 | 0 | 0 | 0 |
| 8676 | Pig | Central | 0 | 0 | 0 | 0 | 0 | 0 |
| 8677 | Pig | Central | 0 | 0 | 0 | 0 | 0 | 0 |
| 8678 | Pig | Central | 0 | 0 | 0 | 0 | 0 | 0 |
| 8679 | Pig | Central | 0 | 0 | 0 | 0 | 0 | 0 |
| 8680 | Pig | Central | 0 | 0 | 0 | 0 | 0 | 0 |
| 8681 | Pig | Central | 0 | 0 | 0 | 0 | 0 | 0 |
| 8682 | Pig | Central | 0 | 0 | 0 | 0 | 0 | 0 |
| 8683 | Pig | Central | 0 | 0 | 0 | 0 | 0 | 0 |
| 8684 | Pig | Central | 0 | 0 | 0 | 0 | 0 | 0 |
| 8685 | Pig | Central | 0 | 0 | 0 | 0 | 0 | 0 |
| 8686 | Pig | Central | 0 | 0 | 0 | 0 | 0 | 0 |
| 8687 | Pig | Central | 0 | 0 | 0 | 0 | 0 | 0 |

|      |     |         |   |   |   |   |   |   |
|------|-----|---------|---|---|---|---|---|---|
| 8688 | Pig | Central | 0 | 0 | 0 | 0 | 0 | 0 |
| 8689 | Pig | Central | 0 | 0 | 0 | 0 | 0 | 0 |
| 8690 | Pig | Central | 0 | 0 | 0 | 0 | 0 | 0 |
| 8691 | Pig | Central | 0 | 0 | 0 | 0 | 0 | 0 |
| 8692 | Pig | Central | 0 | 0 | 0 | 0 | 0 | 0 |
| 8693 | Pig | Central | 0 | 0 | 0 | 0 | 0 | 0 |
| 8694 | Pig | Central | 0 | 0 | 0 | 0 | 0 | 0 |
| 8695 | Pig | Central | 0 | 0 | 0 | 0 | 0 | 0 |
| 8696 | Pig | Central | 0 | 0 | 0 | 0 | 0 | 0 |
| 8697 | Pig | Central | 0 | 0 | 0 | 0 | 0 | 0 |
| 8698 | Pig | Central | 0 | 0 | 0 | 0 | 0 | 0 |
| 8699 | Pig | Central | 0 | 0 | 0 | 0 | 0 | 0 |
| 8700 | Pig | Central | 0 | 0 | 0 | 0 | 0 | 0 |
| 8701 | Pig | Central | 0 | 0 | 0 | 0 | 0 | 0 |
| 8702 | Pig | Central | 0 | 0 | 0 | 0 | 0 | 0 |
| 8703 | Pig | Central | 0 | 0 | 0 | 0 | 0 | 0 |
| 8704 | Pig | Central | 0 | 0 | 0 | 0 | 0 | 0 |
| 8705 | Pig | Central | 0 | 0 | 0 | 0 | 0 | 0 |
| 8706 | Pig | Central | 0 | 0 | 0 | 0 | 0 | 0 |
| 8707 | Pig | Central | 0 | 0 | 0 | 0 | 0 | 0 |
| 8708 | Pig | Central | 0 | 0 | 0 | 0 | 0 | 0 |
| 8709 | Pig | Central | 0 | 0 | 0 | 0 | 0 | 0 |
| 8710 | Pig | Central | 0 | 0 | 0 | 0 | 0 | 0 |
| 8711 | Pig | Central | 0 | 0 | 0 | 0 | 0 | 0 |
| 8712 | Pig | Central | 0 | 0 | 0 | 0 | 0 | 0 |
| 8713 | Pig | Central | 0 | 0 | 0 | 0 | 0 | 0 |
| 8714 | Pig | Central | 0 | 0 | 0 | 0 | 0 | 0 |
| 8715 | Pig | Central | 0 | 0 | 0 | 0 | 0 | 0 |
| 8716 | Pig | Central | 0 | 0 | 0 | 0 | 0 | 0 |
| 8717 | Pig | Central | 0 | 0 | 0 | 0 | 0 | 0 |
| 8718 | Pig | Central | 0 | 0 | 0 | 0 | 0 | 0 |
| 8719 | Pig | Central | 0 | 0 | 0 | 0 | 0 | 0 |
| 8720 | Pig | Central | 0 | 0 | 0 | 0 | 0 | 0 |
| 8721 | Pig | Central | 0 | 0 | 0 | 0 | 0 | 0 |
| 8722 | Pig | Central | 0 | 0 | 0 | 0 | 0 | 0 |
| 8723 | Pig | Central | 0 | 0 | 0 | 0 | 0 | 0 |
| 8724 | Pig | Central | 0 | 0 | 0 | 0 | 0 | 0 |
| 8725 | Pig | Central | 0 | 0 | 0 | 0 | 0 | 0 |
| 8726 | Pig | Central | 0 | 0 | 0 | 0 | 0 | 0 |
| 8727 | Pig | Central | 0 | 0 | 0 | 0 | 0 | 0 |
| 8728 | Pig | Central | 0 | 0 | 0 | 0 | 0 | 0 |
| 8729 | Pig | Central | 0 | 0 | 0 | 0 | 0 | 0 |
| 8730 | Pig | Central | 0 | 0 | 0 | 0 | 0 | 0 |
| 8731 | Pig | Central | 0 | 0 | 0 | 0 | 0 | 0 |
| 8732 | Pig | Central | 0 | 0 | 0 | 0 | 0 | 0 |
| 8733 | Pig | Central | 0 | 0 | 0 | 0 | 0 | 0 |
| 8734 | Pig | Central | 0 | 0 | 0 | 0 | 0 | 0 |
| 8735 | Pig | Central | 0 | 0 | 0 | 0 | 0 | 0 |

|      |         |              |   |   |   |   |   |   |
|------|---------|--------------|---|---|---|---|---|---|
| 8736 | Pig     | Central      | 0 | 0 | 0 | 0 | 0 | 0 |
| 8737 | Pig     | Central      | 0 | 0 | 0 | 0 | 0 | 0 |
| 8738 | Pig     | Central      | 0 | 0 | 0 | 0 | 0 | 0 |
| 8739 | Pig     | Central      | 0 | 0 | 0 | 0 | 0 | 0 |
| 8740 | Pig     | Central      | 0 | 0 | 0 | 0 | 0 | 0 |
| 8741 | Pig     | Central      | 0 | 0 | 0 | 0 | 0 | 0 |
| 8742 | Pig     | Central      | 0 | 0 | 0 | 0 | 0 | 0 |
| 8743 | Pig     | Central      | 0 | 0 | 0 | 0 | 0 | 0 |
| 8744 | Pig     | Central      | 0 | 0 | 0 | 0 | 0 | 0 |
| 8745 | Pig     | Central      | 0 | 0 | 0 | 0 | 0 | 0 |
| 8746 | Pig     | Central      | 0 | 0 | 0 | 0 | 0 | 0 |
| 8747 | Pig     | Central      | 0 | 0 | 0 | 0 | 0 | 0 |
| 8748 | Pig     | Central      | 0 | 0 | 0 | 0 | 0 | 0 |
| 8749 | Pig     | Central      | 0 | 0 | 0 | 0 | 0 | 0 |
| 8750 | Pig     | Central      | 0 | 0 | 0 | 0 | 0 | 0 |
| 8751 | Pig     | Central      | 0 | 0 | 0 | 0 | 0 | 0 |
| 8752 | Pig     | Central      | 0 | 0 | 0 | 0 | 0 | 0 |
| 8753 | Pig     | Central      | 0 | 0 | 0 | 0 | 0 | 0 |
| 8754 | Pig     | Central      | 0 | 0 | 0 | 0 | 0 | 0 |
| 8755 | Pig     | Central      | 0 | 0 | 0 | 0 | 0 | 0 |
| 8756 | Pig     | Central      | 0 | 0 | 0 | 0 | 0 | 0 |
| 8757 | Pig     | Central      | 0 | 0 | 0 | 0 | 0 | 0 |
| 8758 | Pig     | Central      | 0 | 0 | 0 | 0 | 0 | 0 |
| 8759 | Pig     | Central      | 0 | 0 | 0 | 0 | 0 | 0 |
| 8760 | Pig     | Central      | 0 | 0 | 0 | 0 | 0 | 0 |
| 8761 | Pig     | Central      | 0 | 0 | 0 | 0 | 0 | 0 |
| 8762 | Pig     | Central      | 0 | 0 | 0 | 0 | 0 | 0 |
| 8763 | Pig     | Central      | 0 | 0 | 0 | 0 | 0 | 0 |
| 8764 | Pig     | Central      | 0 | 0 | 0 | 0 | 0 | 0 |
| 8765 | Pig     | Central      | 0 | 0 | 0 | 0 | 0 | 0 |
| 8766 | Pig     | Central      | 0 | 0 | 0 | 0 | 0 | 0 |
| 8767 | Pig     | Central      | 0 | 0 | 0 | 0 | 0 | 0 |
| 8768 | Pig     | Central      | 0 | 0 | 0 | 0 | 0 | 0 |
| 8769 | Pig     | Central      | 0 | 0 | 0 | 0 | 0 | 0 |
| 8770 | Pig     | Central      | 0 | 0 | 0 | 0 | 0 | 0 |
| 8771 | Pig     | Central      | 0 | 0 | 0 | 0 | 0 | 0 |
| 8772 | Pig     | Central      | 0 | 0 | 0 | 0 | 0 | 0 |
| 8773 | Pig     | Central      | 0 | 0 | 0 | 0 | 0 | 0 |
| 8774 | Pig     | Central      | 0 | 0 | 0 | 0 | 0 | 0 |
| 8775 | Pig     | Central      | 0 | 0 | 0 | 0 | 0 | 0 |
| 8776 | Pig     | Central      | 0 | 0 | 0 | 0 | 0 | 0 |
| 8777 | Buffalo | Northeastern | 0 | 0 | 0 | 0 | 0 | 0 |
| 8778 | Buffalo | Northeastern | 0 | 0 | 0 | 0 | 0 | 0 |
| 8779 | Buffalo | Northeastern | 0 | 0 | 0 | 0 | 0 | 0 |
| 8780 | Buffalo | Northeastern | 0 | 0 | 0 | 0 | 0 | 0 |
| 8781 | Buffalo | Northeastern | 0 | 0 | 0 | 0 | 0 | 0 |
| 8782 | Buffalo | Northeastern | 0 | 0 | 0 | 0 | 1 | 1 |
| 8783 | Buffalo | Northeastern | 0 | 0 | 0 | 0 | 1 | 1 |

|      |         |              |   |   |   |   |   |   |
|------|---------|--------------|---|---|---|---|---|---|
| 8784 | Buffalo | Northeastern | 0 | 0 | 0 | 0 | 0 | 0 |
| 8785 | Buffalo | Northeastern | 0 | 0 | 0 | 0 | 1 | 1 |
| 8786 | Buffalo | Northeastern | 0 | 0 | 0 | 0 | 1 | 1 |
| 8787 | Buffalo | Northeastern | 0 | 0 | 0 | 1 | 0 | 1 |
| 8788 | Buffalo | Northeastern | 0 | 0 | 0 | 0 | 1 | 1 |
| 8789 | Buffalo | Northeastern | 0 | 0 | 0 | 0 | 1 | 1 |
| 8790 | Buffalo | Northeastern | 0 | 0 | 0 | 0 | 0 | 0 |
| 8791 | Buffalo | Northeastern | 0 | 0 | 0 | 1 | 1 | 1 |
| 8792 | Buffalo | Northeastern | 0 | 0 | 0 | 0 | 0 | 0 |
| 8793 | Buffalo | Northeastern | 0 | 0 | 0 | 0 | 1 | 1 |
| 8794 | Buffalo | Northeastern | 0 | 0 | 0 | 0 | 1 | 1 |
| 8795 | Buffalo | Northeastern | 0 | 0 | 0 | 0 | 1 | 1 |
| 8796 | Buffalo | Northeastern | 0 | 0 | 0 | 0 | 0 | 0 |
| 8797 | Buffalo | Northeastern | 0 | 0 | 0 | 0 | 1 | 1 |
| 8798 | Buffalo | Northeastern | 0 | 0 | 0 | 0 | 0 | 0 |
| 8799 | Buffalo | Northeastern | 0 | 0 | 0 | 0 | 0 | 0 |
| 8800 | Buffalo | Northeastern | 0 | 1 | 0 | 0 | 0 | 1 |
| 8801 | Buffalo | Northeastern | 0 | 0 | 0 | 0 | 0 | 0 |
| 8802 | Buffalo | Northeastern | 0 | 0 | 0 | 0 | 0 | 0 |
| 8803 | Buffalo | Northeastern | 0 | 0 | 0 | 0 | 0 | 0 |
| 8804 | Buffalo | Northeastern | 0 | 0 | 0 | 0 | 0 | 0 |
| 8805 | Buffalo | Northeastern | 0 | 0 | 0 | 0 | 0 | 0 |
| 8806 | Buffalo | Northeastern | 0 | 0 | 0 | 0 | 0 | 0 |
| 8807 | Buffalo | Northeastern | 0 | 0 | 0 | 0 | 0 | 0 |
| 8808 | Buffalo | Northeastern | 0 | 0 | 0 | 0 | 0 | 0 |
| 8809 | Buffalo | Northeastern | 0 | 0 | 0 | 0 | 0 | 0 |
| 8810 | Buffalo | Northeastern | 0 | 0 | 0 | 0 | 0 | 0 |
| 8811 | Buffalo | Northeastern | 0 | 0 | 0 | 0 | 0 | 0 |
| 8812 | Buffalo | Northeastern | 0 | 0 | 0 | 1 | 0 | 1 |
| 8813 | Buffalo | Northeastern | 0 | 0 | 0 | 1 | 0 | 1 |
| 8814 | Buffalo | Northeastern | 0 | 0 | 0 | 0 | 0 | 0 |
| 8815 | Buffalo | Northeastern | 0 | 0 | 0 | 0 | 1 | 1 |
| 8816 | Buffalo | Northeastern | 0 | 0 | 0 | 0 | 0 | 0 |
| 8817 | Buffalo | Northeastern | 0 | 0 | 0 | 0 | 0 | 0 |
| 8818 | Buffalo | Northeastern | 0 | 0 | 0 | 0 | 0 | 0 |
| 8819 | Buffalo | Northeastern | 0 | 0 | 0 | 0 | 0 | 0 |
| 8820 | Buffalo | Northeastern | 0 | 0 | 0 | 0 | 0 | 0 |
| 8821 | Buffalo | Northeastern | 0 | 0 | 0 | 1 | 0 | 1 |
| 8822 | Buffalo | Northeastern | 0 | 0 | 0 | 0 | 0 | 0 |
| 8823 | Buffalo | Northeastern | 0 | 0 | 0 | 0 | 0 | 1 |
| 8824 | Buffalo | Northeastern | 0 | 0 | 0 | 0 | 0 | 0 |
| 8825 | Buffalo | Northeastern | 0 | 0 | 0 | 1 | 0 | 1 |
| 8826 | Buffalo | Northeastern | 0 | 0 | 0 | 0 | 0 | 0 |
| 8827 | Buffalo | Northeastern | 0 | 0 | 0 | 1 | 0 | 1 |
| 8828 | Buffalo | Northeastern | 0 | 0 | 0 | 1 | 0 | 1 |
| 8829 | Buffalo | Northeastern | 0 | 0 | 0 | 0 | 0 | 0 |
| 8830 | Buffalo | Northeastern | 0 | 0 | 0 | 0 | 0 | 0 |
| 8831 | Buffalo | Northeastern | 0 | 0 | 0 | 0 | 0 | 0 |



|      |         |              |   |   |   |   |   |   |
|------|---------|--------------|---|---|---|---|---|---|
| 8832 | Buffalo | Northeastern | 0 | 0 | 0 | 1 | 0 | 1 |
| 8833 | Buffalo | Northeastern | 0 | 0 | 0 | 0 | 0 | 0 |
| 8834 | Buffalo | Northeastern | 0 | 0 | 0 | 0 | 0 | 0 |
| 8835 | Buffalo | Northeastern | 0 | 0 | 0 | 0 | 0 | 0 |
| 8836 | Buffalo | Northeastern | 0 | 0 | 0 | 0 | 0 | 0 |
| 8837 | Buffalo | Northeastern | 0 | 0 | 0 | 0 | 1 | 1 |
| 8838 | Buffalo | Northeastern | 0 | 0 | 0 | 0 | 0 | 0 |
| 8839 | Buffalo | Northeastern | 0 | 0 | 0 | 0 | 0 | 0 |
| 8840 | Buffalo | Northeastern | 0 | 0 | 0 | 0 | 0 | 0 |
| 8841 | Buffalo | Northeastern | 0 | 0 | 0 | 0 | 0 | 0 |
| 8842 | Buffalo | Northeastern | 0 | 0 | 0 | 0 | 0 | 0 |
| 8843 | Buffalo | Northeastern | 0 | 0 | 0 | 0 | 0 | 0 |
| 8844 | Buffalo | Northeastern | 0 | 0 | 0 | 0 | 0 | 0 |
| 8845 | Buffalo | Northeastern | 0 | 1 | 0 | 0 | 0 | 1 |
| 8846 | Buffalo | Northeastern | 0 | 0 | 0 | 0 | 0 | 0 |
| 8847 | Buffalo | Northeastern | 0 | 0 | 0 | 0 | 0 | 0 |
| 8848 | Buffalo | Northeastern | 0 | 0 | 0 | 0 | 1 | 1 |
| 8849 | Buffalo | Northeastern | 0 | 0 | 0 | 0 | 0 | 0 |
| 8850 | Buffalo | Northeastern | 0 | 1 | 0 | 0 | 0 | 1 |
| 8851 | Buffalo | Northeastern | 0 | 0 | 0 | 0 | 0 | 0 |
| 8852 | Buffalo | Northeastern | 0 | 0 | 0 | 0 | 0 | 0 |
| 8853 | Buffalo | Northeastern | 0 | 0 | 0 | 0 | 0 | 0 |
| 8854 | Buffalo | Northeastern | 0 | 0 | 0 | 0 | 0 | 0 |
| 8855 | Buffalo | Northeastern | 0 | 0 | 0 | 0 | 0 | 0 |
| 8856 | Buffalo | Northeastern | 0 | 0 | 0 | 0 | 0 | 0 |
| 8857 | Buffalo | Northeastern | 0 | 0 | 0 | 0 | 0 | 0 |
| 8858 | Buffalo | Northeastern | 0 | 0 | 0 | 0 | 0 | 0 |
| 8859 | Buffalo | Northeastern | 0 | 0 | 0 | 0 | 0 | 0 |
| 8860 | Buffalo | Northeastern | 0 | 1 | 0 | 0 | 0 | 1 |
| 8861 | Buffalo | Northeastern | 0 | 0 | 0 | 0 | 0 | 0 |
| 8862 | Buffalo | Northeastern | 0 | 0 | 0 | 0 | 0 | 0 |
| 8863 | Buffalo | Northeastern | 0 | 1 | 0 | 0 | 0 | 1 |
| 8864 | Buffalo | Northeastern | 0 | 1 | 0 | 0 | 0 | 1 |
| 8865 | Buffalo | Northeastern | 0 | 0 | 0 | 0 | 0 | 0 |
| 8866 | Buffalo | Northeastern | 0 | 0 | 0 | 0 | 0 | 0 |
| 8867 | Buffalo | Northeastern | 0 | 1 | 0 | 0 | 0 | 1 |
| 8868 | Buffalo | Northeastern | 0 | 0 | 0 | 0 | 0 | 0 |
| 8869 | Buffalo | Northeastern | 0 | 0 | 0 | 0 | 0 | 0 |
| 8870 | Buffalo | Northeastern | 0 | 0 | 0 | 1 | 0 | 1 |
| 8871 | Buffalo | Northeastern | 0 | 0 | 0 | 0 | 0 | 0 |
| 8872 | Buffalo | Northeastern | 0 | 0 | 0 | 1 | 0 | 1 |
| 8873 | Buffalo | Northeastern | 0 | 0 | 0 | 0 | 0 | 0 |
| 8874 | Buffalo | Northeastern | 0 | 0 | 0 | 0 | 0 | 0 |
| 8875 | Buffalo | Northeastern | 0 | 1 | 0 | 0 | 0 | 1 |
| 8876 | Buffalo | Northeastern | 0 | 0 | 0 | 0 | 0 | 0 |
| 8877 | Buffalo | Northeastern | 0 | 1 | 0 | 0 | 0 | 1 |
| 8878 | Buffalo | Northeastern | 0 | 0 | 0 | 0 | 0 | 0 |
| 8879 | Buffalo | Northeastern | 0 | 0 | 0 | 0 | 0 | 0 |

|      |         |              |   |   |   |   |   |   |
|------|---------|--------------|---|---|---|---|---|---|
| 8880 | Buffalo | Northeastern | 0 | 0 | 0 | 0 | 0 | 0 |
| 8881 | Buffalo | Northeastern | 0 | 0 | 0 | 0 | 0 | 0 |
| 8882 | Buffalo | Northeastern | 0 | 0 | 0 | 0 | 0 | 0 |
| 8883 | Buffalo | Northeastern | 0 | 0 | 0 | 0 | 0 | 0 |
| 8884 | Buffalo | Northeastern | 0 | 0 | 0 | 0 | 0 | 0 |
| 8885 | Buffalo | Northeastern | 0 | 0 | 0 | 0 | 0 | 0 |
| 8886 | Buffalo | Northeastern | 0 | 0 | 0 | 0 | 0 | 0 |
| 8887 | Buffalo | Northeastern | 0 | 0 | 0 | 0 | 0 | 0 |
| 8888 | Buffalo | Northeastern | 0 | 0 | 0 | 0 | 0 | 0 |
| 8889 | Buffalo | Northeastern | 0 | 0 | 0 | 0 | 0 | 0 |
| 8890 | Buffalo | Northeastern | 0 | 0 | 0 | 0 | 0 | 0 |
| 8891 | Buffalo | Northeastern | 0 | 0 | 0 | 0 | 0 | 0 |
| 8892 | Buffalo | Northeastern | 0 | 0 | 0 | 0 | 0 | 0 |
| 8893 | Buffalo | Northeastern | 0 | 0 | 0 | 0 | 0 | 0 |
| 8894 | Buffalo | Northeastern | 0 | 0 | 0 | 0 | 0 | 0 |
| 8895 | Buffalo | Northeastern | 0 | 0 | 0 | 0 | 0 | 0 |
| 8896 | Buffalo | Northeastern | 0 | 0 | 0 | 0 | 0 | 0 |
| 8897 | Buffalo | Northeastern | 0 | 0 | 0 | 0 | 0 | 0 |
| 8898 | Buffalo | Northeastern | 0 | 0 | 0 | 0 | 0 | 0 |
| 8899 | Buffalo | Northeastern | 0 | 0 | 0 | 0 | 0 | 0 |
| 8900 | Buffalo | Northeastern | 0 | 0 | 0 | 0 | 0 | 0 |
| 8901 | Buffalo | Northeastern | 0 | 0 | 0 | 0 | 0 | 0 |
| 8902 | Buffalo | Northeastern | 0 | 0 | 0 | 0 | 0 | 0 |
| 8903 | Buffalo | Northeastern | 0 | 0 | 0 | 0 | 0 | 0 |
| 8904 | Buffalo | Northeastern | 0 | 0 | 0 | 0 | 0 | 0 |
| 8905 | Buffalo | Northeastern | 0 | 0 | 0 | 0 | 0 | 0 |
| 8906 | Buffalo | Northeastern | 0 | 0 | 0 | 0 | 0 | 0 |
| 8907 | Buffalo | Northeastern | 0 | 0 | 0 | 0 | 0 | 0 |
| 8908 | Buffalo | Northeastern | 0 | 0 | 0 | 0 | 0 | 0 |
| 8909 | Buffalo | Northeastern | 0 | 0 | 0 | 0 | 0 | 0 |
| 8910 | Buffalo | Northeastern | 0 | 0 | 0 | 0 | 0 | 0 |
| 8911 | Buffalo | Northeastern | 0 | 0 | 0 | 0 | 0 | 0 |
| 8912 | Buffalo | Northeastern | 0 | 0 | 0 | 0 | 0 | 0 |
| 8913 | Buffalo | Northeastern | 0 | 0 | 0 | 0 | 0 | 0 |
| 8914 | Buffalo | Northeastern | 0 | 0 | 0 | 0 | 0 | 0 |
| 8915 | Buffalo | Northeastern | 0 | 0 | 0 | 0 | 0 | 0 |
| 8916 | Buffalo | Northeastern | 0 | 0 | 0 | 0 | 0 | 0 |
| 8917 | Buffalo | Northeastern | 0 | 0 | 0 | 0 | 0 | 0 |
| 8918 | Buffalo | Northeastern | 0 | 0 | 0 | 0 | 0 | 0 |
| 8919 | Buffalo | Northeastern | 0 | 0 | 0 | 0 | 0 | 0 |
| 8920 | Buffalo | Northeastern | 0 | 0 | 0 | 0 | 0 | 0 |
| 8921 | Buffalo | Northeastern | 0 | 0 | 0 | 0 | 0 | 0 |
| 8922 | Buffalo | Northeastern | 0 | 0 | 0 | 0 | 0 | 0 |
| 8923 | Buffalo | Northeastern | 0 | 0 | 0 | 0 | 0 | 0 |
| 8924 | Buffalo | Northeastern | 0 | 0 | 0 | 0 | 0 | 0 |
| 8925 | Buffalo | Northeastern | 0 | 0 | 0 | 0 | 0 | 0 |
| 8926 | Buffalo | Northeastern | 0 | 0 | 0 | 0 | 0 | 0 |
| 8927 | Buffalo | Northeastern | 0 | 0 | 0 | 0 | 0 | 0 |

|      |         |              |   |   |   |   |   |   |
|------|---------|--------------|---|---|---|---|---|---|
| 8928 | Buffalo | Northeastern | 0 | 0 | 0 | 0 | 0 | 0 |
| 8929 | Buffalo | Northeastern | 0 | 0 | 0 | 0 | 0 | 0 |
| 8930 | Buffalo | Northeastern | 0 | 0 | 0 | 0 | 0 | 0 |
| 8931 | Buffalo | Northeastern | 0 | 0 | 0 | 0 | 0 | 0 |
| 8932 | Buffalo | Northeastern | 0 | 0 | 0 | 0 | 0 | 0 |
| 8933 | Buffalo | Northeastern | 0 | 0 | 0 | 0 | 0 | 0 |
| 8934 | Buffalo | Northeastern | 0 | 0 | 0 | 0 | 0 | 0 |
| 8935 | Buffalo | Northeastern | 0 | 0 | 0 | 0 | 0 | 0 |
| 8936 | Buffalo | Northeastern | 0 | 0 | 0 | 0 | 0 | 0 |
| 8937 | Buffalo | Northeastern | 0 | 0 | 0 | 0 | 0 | 0 |
| 8938 | Buffalo | Northeastern | 0 | 0 | 0 | 0 | 0 | 0 |
| 8939 | Buffalo | Northeastern | 0 | 0 | 0 | 0 | 0 | 0 |
| 8940 | Buffalo | Northeastern | 0 | 0 | 0 | 0 | 0 | 0 |
| 8941 | Buffalo | Northeastern | 0 | 0 | 0 | 0 | 0 | 0 |
| 8942 | Buffalo | Northeastern | 0 | 0 | 0 | 0 | 0 | 0 |
| 8943 | Buffalo | Northeastern | 0 | 0 | 0 | 0 | 0 | 0 |
| 8944 | Buffalo | Northeastern | 0 | 0 | 0 | 0 | 0 | 0 |
| 8945 | Buffalo | Northeastern | 0 | 0 | 0 | 0 | 0 | 0 |
| 8946 | Buffalo | Northeastern | 0 | 0 | 0 | 0 | 0 | 0 |
| 8947 | Buffalo | Northeastern | 0 | 0 | 0 | 0 | 0 | 0 |
| 8948 | Buffalo | Northeastern | 0 | 0 | 0 | 0 | 0 | 0 |
| 8949 | Buffalo | Northeastern | 0 | 0 | 0 | 0 | 0 | 0 |
| 8950 | Buffalo | Northeastern | 0 | 0 | 0 | 0 | 0 | 0 |
| 8951 | Buffalo | Northeastern | 0 | 0 | 0 | 0 | 0 | 0 |
| 8952 | Buffalo | Northeastern | 0 | 0 | 0 | 0 | 0 | 0 |
| 8953 | Buffalo | Northeastern | 0 | 0 | 0 | 0 | 0 | 0 |
| 8954 | Buffalo | Northeastern | 0 | 0 | 0 | 0 | 0 | 0 |
| 8955 | Buffalo | Northeastern | 0 | 0 | 0 | 0 | 0 | 0 |
| 8956 | Buffalo | Northeastern | 0 | 0 | 0 | 0 | 0 | 0 |
| 8957 | Buffalo | Northeastern | 0 | 0 | 0 | 0 | 0 | 0 |
| 8958 | Buffalo | Northeastern | 0 | 0 | 0 | 0 | 0 | 0 |
| 8959 | Buffalo | Northeastern | 0 | 0 | 0 | 0 | 0 | 0 |
| 8960 | Buffalo | Northeastern | 0 | 0 | 0 | 0 | 0 | 0 |
| 8961 | Buffalo | Northeastern | 0 | 0 | 0 | 0 | 0 | 0 |
| 8962 | Buffalo | Northeastern | 0 | 0 | 0 | 0 | 0 | 0 |
| 8963 | Buffalo | Northeastern | 0 | 0 | 0 | 0 | 0 | 0 |
| 8964 | Buffalo | Northeastern | 0 | 0 | 0 | 0 | 0 | 0 |
| 8965 | Buffalo | Northeastern | 0 | 0 | 0 | 0 | 0 | 0 |
| 8966 | Buffalo | Northeastern | 0 | 0 | 0 | 0 | 0 | 0 |
| 8967 | Buffalo | Northeastern | 0 | 0 | 0 | 0 | 0 | 0 |
| 8968 | Buffalo | Northeastern | 0 | 0 | 0 | 0 | 0 | 0 |
| 8969 | Buffalo | Northeastern | 0 | 0 | 0 | 0 | 0 | 0 |
| 8970 | Buffalo | Northeastern | 0 | 0 | 0 | 0 | 0 | 0 |
| 8971 | Buffalo | Northeastern | 0 | 0 | 0 | 0 | 0 | 0 |
| 8972 | Buffalo | Northeastern | 0 | 0 | 0 | 0 | 0 | 0 |
| 8973 | Buffalo | Northeastern | 0 | 0 | 0 | 0 | 0 | 0 |
| 8974 | Buffalo | Northeastern | 0 | 0 | 0 | 0 | 0 | 0 |
| 8975 | Buffalo | Northeastern | 0 | 0 | 0 | 0 | 0 | 0 |

|      |         |              |   |   |   |   |   |   |
|------|---------|--------------|---|---|---|---|---|---|
| 8976 | Buffalo | Northeastern | 0 | 0 | 0 | 0 | 0 | 0 |
| 8977 | Buffalo | Northeastern | 0 | 0 | 0 | 0 | 0 | 0 |
| 8978 | Buffalo | Northeastern | 0 | 0 | 0 | 0 | 0 | 0 |
| 8979 | Buffalo | Northeastern | 0 | 0 | 0 | 0 | 0 | 0 |
| 8980 | Buffalo | Northeastern | 0 | 0 | 0 | 0 | 0 | 0 |
| 8981 | Buffalo | Northeastern | 0 | 0 | 0 | 0 | 0 | 0 |
| 8982 | Buffalo | Northeastern | 0 | 0 | 0 | 0 | 0 | 0 |
| 8983 | Buffalo | Central      | 0 | 0 | 0 | 0 | 0 | 0 |
| 8984 | Buffalo | Central      | 0 | 0 | 0 | 0 | 0 | 0 |
| 8985 | Buffalo | Central      | 0 | 0 | 0 | 0 | 0 | 0 |
| 8986 | Buffalo | Eastern      | 0 | 0 | 0 | 0 | 1 | 1 |
| 8987 | Buffalo | Eastern      | 0 | 0 | 0 | 0 | 0 | 0 |
| 8988 | Buffalo | Eastern      | 0 | 0 | 0 | 0 | 0 | 0 |
| 8989 | Buffalo | Eastern      | 0 | 0 | 0 | 0 | 0 | 0 |
| 8990 | Buffalo | Eastern      | 0 | 0 | 1 | 0 | 0 | 1 |
| 8991 | Buffalo | Eastern      | 0 | 0 | 0 | 0 | 0 | 1 |
| 8992 | Buffalo | Eastern      | 0 | 0 | 0 | 0 | 0 | 0 |
| 8993 | Buffalo | Eastern      | 0 | 0 | 0 | 0 | 1 | 1 |
| 8994 | Buffalo | Eastern      | 0 | 0 | 0 | 0 | 0 | 0 |
| 8995 | Buffalo | Eastern      | 0 | 0 | 0 | 1 | 1 | 1 |
| 8996 | Buffalo | Eastern      | 0 | 1 | 0 | 0 | 0 | 1 |
| 8997 | Buffalo | Eastern      | 0 | 0 | 0 | 0 | 0 | 0 |
| 8998 | Buffalo | Eastern      | 0 | 0 | 0 | 0 | 0 | 0 |
| 8999 | Buffalo | Eastern      | 0 | 0 | 0 | 0 | 1 | 1 |
| 9000 | Buffalo | Eastern      | 0 | 0 | 0 | 0 | 1 | 1 |
| 9001 | Buffalo | Eastern      | 0 | 0 | 0 | 0 | 0 | 0 |
| 9002 | Buffalo | Eastern      | 0 | 0 | 0 | 0 | 0 | 0 |
| 9003 | Buffalo | Eastern      | 0 | 0 | 0 | 1 | 1 | 1 |
| 9004 | Buffalo | Eastern      | 0 | 0 | 0 | 0 | 1 | 1 |
| 9005 | Buffalo | Eastern      | 0 | 0 | 0 | 0 | 0 | 0 |
| 9006 | Buffalo | Eastern      | 0 | 0 | 0 | 0 | 1 | 1 |
| 9007 | Buffalo | Eastern      | 0 | 0 | 0 | 0 | 0 | 0 |
| 9008 | Buffalo | Eastern      | 0 | 0 | 0 | 0 | 0 | 0 |
| 9009 | Buffalo | Eastern      | 0 | 0 | 0 | 0 | 1 | 1 |
| 9010 | Buffalo | Eastern      | 0 | 0 | 0 | 0 | 0 | 0 |
| 9011 | Buffalo | Eastern      | 0 | 0 | 0 | 0 | 0 | 0 |
| 9012 | Buffalo | Eastern      | 0 | 0 | 0 | 0 | 0 | 0 |
| 9013 | Buffalo | Eastern      | 0 | 0 | 0 | 0 | 0 | 0 |
| 9014 | Buffalo | Eastern      | 0 | 0 | 0 | 0 | 1 | 1 |
| 9015 | Buffalo | Eastern      | 0 | 0 | 0 | 0 | 0 | 0 |
| 9016 | Buffalo | Eastern      | 0 | 0 | 0 | 0 | 0 | 0 |
| 9017 | Buffalo | Eastern      | 0 | 0 | 0 | 0 | 0 | 0 |
| 9018 | Buffalo | Eastern      | 0 | 1 | 0 | 0 | 0 | 1 |
| 9019 | Buffalo | Eastern      | 0 | 0 | 0 | 0 | 0 | 0 |
| 9020 | Buffalo | Eastern      | 0 | 0 | 0 | 1 | 1 | 1 |
| 9021 | Buffalo | Eastern      | 0 | 0 | 0 | 0 | 0 | 0 |
| 9022 | Buffalo | Eastern      | 0 | 0 | 0 | 0 | 0 | 0 |
| 9023 | Buffalo | Eastern      | 0 | 0 | 0 | 0 | 0 | 0 |

|      |         |              |   |   |   |   |   |   |
|------|---------|--------------|---|---|---|---|---|---|
| 9024 | Buffalo | Northeastern | 0 | 0 | 0 | 0 | 0 | 0 |
| 9025 | Buffalo | Central      | 0 | 0 | 0 | 0 | 0 | 0 |
| 9026 | Buffalo | Central      | 0 | 0 | 0 | 1 | 0 | 1 |
| 9027 | Buffalo | Central      | 0 | 0 | 0 | 1 | 0 | 1 |
| 9028 | Buffalo | Northern     | 0 | 0 | 1 | 1 | 1 | 1 |
| 9029 | Buffalo | Northern     | 0 | 0 | 1 | 1 | 1 | 1 |
| 9030 | Buffalo | Northern     | 0 | 0 | 1 | 1 | 0 | 1 |
| 9031 | Buffalo | Northern     | 0 | 0 | 0 | 1 | 0 | 1 |
| 9032 | Buffalo | Northern     | 0 | 0 | 1 | 0 | 0 | 1 |
| 9033 | Buffalo | Northern     | 0 | 0 | 1 | 1 | 0 | 1 |
| 9034 | Buffalo | Northern     | 0 | 0 | 0 | 1 | 1 | 1 |
| 9035 | Buffalo | Northern     | 0 | 0 | 1 | 1 | 0 | 1 |
| 9036 | Buffalo | Northern     | 0 | 0 | 1 | 1 | 0 | 1 |
| 9037 | Buffalo | Northern     | 0 | 0 | 1 | 1 | 0 | 1 |
| 9038 | Buffalo | Northern     | 0 | 0 | 1 | 1 | 0 | 1 |
| 9039 | Buffalo | Northern     | 0 | 0 | 1 | 1 | 0 | 1 |
| 9040 | Buffalo | Northern     | 0 | 0 | 1 | 1 | 0 | 1 |
| 9041 | Buffalo | Northern     | 0 | 0 | 1 | 1 | 0 | 1 |
| 9042 | Buffalo | Northern     | 0 | 0 | 1 | 1 | 0 | 1 |
| 9043 | Buffalo | Northern     | 0 | 0 | 1 | 1 | 0 | 1 |
| 9044 | Buffalo | Northern     | 0 | 0 | 1 | 1 | 0 | 1 |
| 9045 | Buffalo | Northern     | 0 | 0 | 0 | 0 | 0 | 0 |
| 9046 | Buffalo | Northern     | 0 | 0 | 0 | 0 | 0 | 0 |
| 9047 | Buffalo | Northern     | 0 | 0 | 0 | 0 | 0 | 0 |
| 9048 | Buffalo | Northern     | 0 | 0 | 0 | 0 | 0 | 0 |
| 9049 | Buffalo | Northern     | 0 | 0 | 0 | 0 | 0 | 0 |
| 9050 | Buffalo | Northern     | 0 | 0 | 0 | 0 | 0 | 0 |
| 9051 | Buffalo | Northern     | 0 | 0 | 0 | 0 | 0 | 0 |
| 9052 | Buffalo | Northern     | 0 | 0 | 0 | 0 | 0 | 0 |
| 9053 | Buffalo | Northern     | 0 | 0 | 0 | 0 | 0 | 0 |
| 9054 | Buffalo | Northern     | 0 | 0 | 0 | 0 | 0 | 0 |
| 9055 | Buffalo | Northern     | 0 | 0 | 0 | 0 | 0 | 0 |
| 9056 | Buffalo | Northern     | 0 | 0 | 0 | 0 | 0 | 0 |
| 9057 | Buffalo | Northern     | 0 | 0 | 0 | 0 | 0 | 0 |
| 9058 | Buffalo | Northern     | 0 | 0 | 0 | 0 | 0 | 0 |
| 9059 | Buffalo | Northern     | 0 | 0 | 0 | 0 | 0 | 0 |
| 9060 | Buffalo | Northern     | 0 | 0 | 0 | 0 | 0 | 0 |
| 9061 | Buffalo | Northern     | 0 | 0 | 0 | 0 | 0 | 0 |
| 9062 | Buffalo | Northern     | 0 | 0 | 0 | 0 | 0 | 0 |
| 9063 | Buffalo | Northern     | 0 | 0 | 0 | 0 | 0 | 0 |
| 9064 | Buffalo | Northern     | 0 | 0 | 0 | 0 | 0 | 0 |
| 9065 | Buffalo | Northern     | 0 | 0 | 0 | 0 | 0 | 0 |
| 9066 | Buffalo | Northern     | 0 | 0 | 0 | 0 | 0 | 0 |
| 9067 | Buffalo | Northern     | 0 | 0 | 0 | 0 | 0 | 0 |
| 9068 | Buffalo | Northern     | 0 | 0 | 0 | 0 | 0 | 0 |
| 9069 | Buffalo | Northern     | 0 | 0 | 0 | 0 | 0 | 0 |
| 9070 | Buffalo | Northern     | 0 | 0 | 0 | 0 | 0 | 0 |
| 9071 | Buffalo | Northern     | 0 | 0 | 0 | 0 | 0 | 1 |

|      |         |          |   |   |   |   |   |   |
|------|---------|----------|---|---|---|---|---|---|
| 9072 | Buffalo | Northern | 0 | 0 | 0 | 0 | 0 | 0 |
| 9073 | Buffalo | Northern | 0 | 0 | 0 | 0 | 0 | 0 |
| 9074 | Buffalo | Northern | 0 | 0 | 0 | 0 | 0 | 1 |
| 9075 | Buffalo | Northern | 0 | 0 | 0 | 0 | 0 | 1 |
| 9076 | Buffalo | Northern | 0 | 0 | 0 | 0 | 0 | 0 |
| 9077 | Buffalo | Northern | 0 | 0 | 0 | 0 | 0 | 0 |
| 9078 | Buffalo | Northern | 0 | 0 | 0 | 0 | 0 | 0 |
| 9079 | Buffalo | Northern | 0 | 0 | 0 | 0 | 0 | 0 |
| 9080 | Buffalo | Northern | 0 | 0 | 0 | 0 | 0 | 0 |
| 9081 | Buffalo | Northern | 0 | 0 | 0 | 0 | 0 | 0 |
| 9082 | Buffalo | Northern | 0 | 0 | 0 | 0 | 0 | 0 |
| 9083 | Buffalo | Northern | 0 | 0 | 0 | 0 | 0 | 0 |
| 9084 | Buffalo | Northern | 0 | 0 | 0 | 0 | 0 | 0 |
| 9085 | Buffalo | Northern | 0 | 0 | 0 | 0 | 0 | 0 |
| 9086 | Buffalo | Northern | 0 | 0 | 0 | 0 | 0 | 0 |
| 9087 | Buffalo | Northern | 0 | 0 | 0 | 0 | 0 | 0 |
| 9088 | Buffalo | Northern | 0 | 0 | 0 | 0 | 0 | 0 |
| 9089 | Buffalo | Northern | 0 | 0 | 0 | 0 | 0 | 0 |
| 9090 | Buffalo | Northern | 0 | 0 | 0 | 0 | 0 | 0 |
| 9091 | Buffalo | Northern | 0 | 0 | 0 | 0 | 0 | 0 |
| 9092 | Buffalo | Northern | 0 | 0 | 0 | 0 | 0 | 0 |
| 9093 | Buffalo | Northern | 0 | 0 | 0 | 0 | 0 | 0 |
| 9094 | Buffalo | Central  | 0 | 0 | 0 | 1 | 0 | 1 |
| 9095 | Buffalo | Central  | 0 | 0 | 0 | 0 | 0 | 0 |
| 9096 | Buffalo | Central  | 0 | 0 | 0 | 0 | 0 | 0 |
| 9097 | Buffalo | Central  | 0 | 0 | 0 | 0 | 0 | 0 |
| 9098 | Buffalo | Central  | 0 | 0 | 0 | 0 | 0 | 0 |
| 9099 | Buffalo | Central  | 0 | 0 | 0 | 0 | 0 | 0 |
| 9100 | Buffalo | Central  | 0 | 0 | 0 | 0 | 0 | 0 |
| 9101 | Buffalo | Central  | 0 | 0 | 0 | 0 | 0 | 0 |
| 9102 | Buffalo | Central  | 0 | 0 | 0 | 0 | 0 | 1 |
| 9103 | Buffalo | Central  | 0 | 0 | 0 | 0 | 0 | 0 |
| 9104 | Buffalo | Central  | 0 | 0 | 0 | 0 | 0 | 0 |
| 9105 | Buffalo | Central  | 0 | 0 | 0 | 0 | 0 | 0 |
| 9106 | Buffalo | Central  | 0 | 0 | 0 | 0 | 0 | 0 |
| 9107 | Buffalo | Central  | 0 | 0 | 0 | 0 | 0 | 0 |
| 9108 | Buffalo | Southern | 0 | 0 | 0 | 0 | 0 | 0 |
| 9109 | Buffalo | Southern | 0 | 0 | 0 | 0 | 0 | 0 |
| 9110 | Buffalo | Southern | 0 | 0 | 0 | 0 | 0 | 0 |
| 9111 | Buffalo | Southern | 0 | 0 | 0 | 0 | 0 | 0 |
| 9112 | Buffalo | Southern | 0 | 0 | 0 | 0 | 0 | 0 |
| 9113 | Buffalo | Southern | 0 | 0 | 0 | 0 | 0 | 0 |
| 9114 | Buffalo | Southern | 0 | 0 | 0 | 0 | 0 | 0 |
| 9115 | Buffalo | Southern | 0 | 0 | 0 | 0 | 0 | 0 |
| 9116 | Buffalo | Southern | 0 | 0 | 0 | 0 | 0 | 0 |
| 9117 | Buffalo | Southern | 0 | 0 | 0 | 0 | 0 | 0 |
| 9118 | Buffalo | Southern | 0 | 0 | 0 | 0 | 0 | 0 |
| 9119 | Buffalo | Southern | 0 | 0 | 0 | 0 | 0 | 0 |

|      |         |          |   |   |   |   |   |   |
|------|---------|----------|---|---|---|---|---|---|
| 9120 | Buffalo | Southern | 0 | 0 | 0 | 0 | 0 | 0 |
| 9121 | Buffalo | Southern | 0 | 0 | 0 | 0 | 0 | 0 |
| 9122 | Buffalo | Southern | 0 | 0 | 0 | 0 | 0 | 0 |
| 9123 | Buffalo | Southern | 0 | 0 | 0 | 0 | 0 | 0 |
| 9124 | Buffalo | Southern | 0 | 0 | 0 | 0 | 0 | 0 |
| 9125 | Buffalo | Southern | 0 | 0 | 0 | 0 | 0 | 0 |
| 9126 | Buffalo | Southern | 0 | 0 | 0 | 0 | 0 | 0 |
| 9127 | Buffalo | Southern | 0 | 0 | 0 | 0 | 0 | 0 |
| 9128 | Buffalo | Southern | 0 | 0 | 0 | 0 | 0 | 0 |
| 9129 | Buffalo | Southern | 0 | 0 | 0 | 0 | 0 | 0 |
| 9130 | Buffalo | Southern | 0 | 0 | 0 | 0 | 0 | 0 |
| 9131 | Buffalo | Southern | 0 | 0 | 0 | 0 | 0 | 0 |
| 9132 | Buffalo | Southern | 1 | 0 | 0 | 0 | 0 | 1 |
| 9133 | Buffalo | Southern | 0 | 0 | 0 | 0 | 0 | 0 |
| 9134 | Buffalo | Southern | 0 | 0 | 0 | 0 | 0 | 0 |
| 9135 | Buffalo | Southern | 0 | 0 | 0 | 0 | 0 | 0 |
| 9136 | Buffalo | Southern | 0 | 0 | 0 | 0 | 0 | 0 |
| 9137 | Buffalo | Southern | 0 | 0 | 0 | 0 | 0 | 0 |
| 9138 | Buffalo | Eastern  | 0 | 0 | 0 | 0 | 0 | 0 |
| 9139 | Buffalo | Eastern  | 0 | 0 | 0 | 0 | 0 | 0 |
| 9140 | Buffalo | Eastern  | 0 | 0 | 0 | 0 | 0 | 0 |
| 9141 | Buffalo | Eastern  | 0 | 0 | 0 | 0 | 0 | 0 |
| 9142 | Buffalo | Eastern  | 0 | 0 | 0 | 0 | 0 | 0 |
| 9143 | Buffalo | Eastern  | 0 | 0 | 0 | 0 | 0 | 0 |
| 9144 | Buffalo | Eastern  | 0 | 0 | 0 | 0 | 0 | 0 |
| 9145 | Buffalo | Eastern  | 0 | 0 | 0 | 0 | 0 | 0 |
| 9146 | Buffalo | Eastern  | 0 | 0 | 0 | 0 | 0 | 0 |
| 9147 | Buffalo | Northern | 0 | 0 | 0 | 0 | 0 | 0 |
| 9148 | Buffalo | Eastern  | 0 | 0 | 0 | 0 | 0 | 0 |
| 9149 | Buffalo | Eastern  | 0 | 0 | 0 | 0 | 0 | 0 |
| 9150 | Buffalo | Eastern  | 0 | 0 | 0 | 0 | 0 | 0 |
| 9151 | Buffalo | Northern | 0 | 0 | 0 | 0 | 0 | 0 |
| 9152 | Buffalo | Central  | 0 | 0 | 1 | 1 | 0 | 1 |
| 9153 | Buffalo | Central  | 0 | 0 | 0 | 0 | 0 | 0 |
| 9154 | Buffalo | Central  | 0 | 0 | 0 | 1 | 0 | 1 |
| 9155 | Buffalo | Central  | 0 | 0 | 0 | 1 | 0 | 1 |
| 9156 | Buffalo | Eastern  | 0 | 0 | 1 | 0 | 0 | 1 |
| 9157 | Buffalo | Eastern  | 0 | 0 | 1 | 1 | 0 | 1 |
| 9158 | Buffalo | Eastern  | 0 | 0 | 0 | 0 | 0 | 0 |
| 9159 | Buffalo | Eastern  | 0 | 0 | 1 | 1 | 0 | 1 |
| 9160 | Buffalo | Eastern  | 0 | 0 | 0 | 1 | 0 | 1 |
| 9161 | Buffalo | Eastern  | 0 | 0 | 0 | 0 | 0 | 0 |
| 9162 | Buffalo | Eastern  | 0 | 0 | 0 | 0 | 0 | 0 |
| 9163 | Buffalo | Eastern  | 0 | 0 | 0 | 0 | 0 | 0 |
| 9164 | Buffalo | Eastern  | 0 | 0 | 1 | 1 | 0 | 1 |
| 9165 | Buffalo | Eastern  | 0 | 0 | 1 | 1 | 0 | 1 |
| 9166 | Buffalo | Central  | 0 | 0 | 0 | 0 | 0 | 0 |
| 9167 | Buffalo | Central  | 0 | 0 | 0 | 0 | 0 | 0 |

|      |         |          |   |   |   |   |   |   |
|------|---------|----------|---|---|---|---|---|---|
| 9168 | Buffalo | Central  | 0 | 0 | 0 | 0 | 0 | 0 |
| 9169 | Buffalo | Central  | 0 | 0 | 0 | 0 | 0 | 0 |
| 9170 | Buffalo | Central  | 0 | 0 | 0 | 0 | 0 | 0 |
| 9171 | Buffalo | Central  | 0 | 0 | 0 | 0 | 0 | 0 |
| 9172 | Buffalo | Northern | 0 | 0 | 0 | 0 | 0 | 0 |
| 9173 | Buffalo | Central  | 0 | 0 | 0 | 0 | 0 | 0 |
| 9174 | Buffalo | Northern | 0 | 0 | 0 | 0 | 0 | 0 |
| 9175 | Buffalo | Central  | 0 | 0 | 0 | 0 | 0 | 0 |
| 9176 | Buffalo | Central  | 0 | 0 | 0 | 0 | 0 | 0 |
| 9177 | Buffalo | Central  | 0 | 0 | 1 | 1 | 0 | 1 |
| 9178 | Buffalo | Central  | 0 | 0 | 0 | 0 | 0 | 0 |
| 9179 | Buffalo | Central  | 0 | 0 | 0 | 0 | 0 | 0 |
| 9180 | Buffalo | Central  | 0 | 0 | 0 | 0 | 0 | 0 |
| 9181 | Buffalo | Eastern  | 0 | 0 | 0 | 0 | 0 | 0 |
| 9182 | Buffalo | Eastern  | 0 | 0 | 0 | 0 | 0 | 0 |
| 9183 | Buffalo | Eastern  | 0 | 0 | 1 | 1 | 0 | 1 |
| 9184 | Buffalo | Eastern  | 0 | 0 | 1 | 1 | 0 | 1 |
| 9185 | Buffalo | Eastern  | 0 | 0 | 1 | 1 | 0 | 1 |
| 9186 | Buffalo | Eastern  | 0 | 0 | 0 | 1 | 0 | 1 |
| 9187 | Buffalo | Eastern  | 0 | 0 | 1 | 0 | 0 | 1 |
| 9188 | Buffalo | Eastern  | 0 | 0 | 0 | 0 | 0 | 0 |
| 9189 | Buffalo | Eastern  | 0 | 0 | 0 | 0 | 0 | 0 |
| 9190 | Buffalo | Eastern  | 0 | 0 | 1 | 0 | 0 | 1 |
| 9191 | Buffalo | Eastern  | 0 | 0 | 1 | 0 | 0 | 1 |
| 9192 | Buffalo | Eastern  | 0 | 0 | 1 | 0 | 0 | 1 |
| 9193 | Buffalo | Eastern  | 0 | 0 | 1 | 0 | 0 | 1 |
| 9194 | Buffalo | Central  | 0 | 0 | 0 | 0 | 0 | 0 |
| 9195 | Buffalo | Central  | 0 | 0 | 1 | 1 | 0 | 1 |
| 9196 | Buffalo | Central  | 0 | 0 | 1 | 0 | 0 | 1 |
| 9197 | Buffalo | Central  | 0 | 1 | 1 | 1 | 0 | 1 |
| 9198 | Buffalo | Central  | 0 | 1 | 1 | 1 | 0 | 1 |
| 9199 | Buffalo | Central  | 1 | 0 | 1 | 1 | 0 | 1 |
| 9200 | Buffalo | Central  | 0 | 0 | 1 | 1 | 0 | 1 |
| 9201 | Buffalo | Central  | 0 | 0 | 1 | 1 | 0 | 1 |
| 9202 | Buffalo | Central  | 0 | 1 | 1 | 1 | 0 | 1 |
| 9203 | Buffalo | Central  | 0 | 0 | 1 | 1 | 0 | 1 |
| 9204 | Buffalo | Central  | 0 | 0 | 1 | 0 | 0 | 1 |
| 9205 | Buffalo | Central  | 0 | 0 | 1 | 0 | 0 | 1 |
| 9206 | Buffalo | Central  | 0 | 0 | 1 | 0 | 0 | 1 |
| 9207 | Buffalo | Central  | 0 | 1 | 0 | 0 | 0 | 1 |
| 9208 | Buffalo | Northern | 0 | 1 | 0 | 0 | 0 | 1 |

1 = Seropositive

0 = Seronegative
